# Supplementary material
Source: PubMed Central journal article supplement (PMC1697327)
Supplement: pnas_0606909103_5.pdf [file pnas_0606909103_5.pdf]

### **Table 5. Functional analysis of gene lists using Gene Ontology (GO) terms.**

255 GO terms were analyzed for representational or directional bias in gene lists from Table 1 and PCA. Contingency tables were analyzed by Chi-squared test with Yates' continuity correction. For representational bias, genes were categorized as regulated (up or down) or not regulated. For directional bias, significant genes (only) were categorized as up or down regulated. For both analyses, genes on microarray were categorized as belonging to GO term ("term") or not belonging to GO term ("n.term"). Only microarray cDNAs assigned to official gene predictions (see Methods) were analyzed (cDNAs with EST identifier only were not assigned GO annotation and were not analyzed here). Significance levels were set to achieve similarly sized gene lists: pre-foraging maturation, hive bee-to-forager transition, and subspecies ( $p < 0.001$ ); all treatment experiments ( $p < 0.01$ ). For PCs, upper and lower 25% were analyzed (as "up-" and "down-regulated"); note that polarity of PCs is arbitrary. Significance of Chi-squared test is indicated by bold ( $p < 0.05$ ) or bold/underlined ( $p < 0.001$ ).

## Pre-foraging maturation (d1 → [d8, d12, d17])

| GO#     | GO term                                                                           | Representational bias |             |               |             |              | Directional bias |            |            |            |              |
|---------|-----------------------------------------------------------------------------------|-----------------------|-------------|---------------|-------------|--------------|------------------|------------|------------|------------|--------------|
|         |                                                                                   | regulated             |             | not regulated |             | $p$          | up-reg.          |            | down-reg.  |            | $p$          |
|         |                                                                                   | term                  | n.term      | term          | n.term      |              | term             | n.term     | term       | n.term     |              |
| 0008150 | biological_process                                                                | 924                   | 657         | 830           | 578         | 0.808        | 495              | 376        | 429        | 281        | 0.165        |
| 0007610 | behavior                                                                          | 81                    | 1500        | 81            | 1327        | 0.498        | <b>30</b>        | <b>841</b> | <b>51</b>  | <b>659</b> | <b>0.001</b> |
| 0030534 | adult behavior                                                                    | <b>18</b>             | <b>1563</b> | <b>6</b>      | <b>1402</b> | <b>0.048</b> | <b>4</b>         | <b>867</b> | <b>14</b>  | <b>696</b> | <b>0.01</b>  |
| 0030537 | larval behavior                                                                   | 3                     | 1578        | 6             | 1402        | 0.399        | 0                | 871        | 3          | 707        | 0.18         |
| 0007611 | learning and/or memory                                                            | 14                    | 1567        | 10            | 1398        | 0.741        | <b>2</b>         | <b>869</b> | <b>12</b>  | <b>698</b> | <b>0.005</b> |
| 0007612 | learning                                                                          | 8                     | 1573        | 7             | 1401        | 0.822        | <b>1</b>         | <b>870</b> | <b>7</b>   | <b>703</b> | <b>0.038</b> |
| 0007613 | memory                                                                            | 6                     | 1575        | 5             | 1403        | 0.847        | 2                | 869        | 4          | 706        | 0.508        |
| 0007626 | locomotory behavior                                                               | 61                    | 1520        | 62            | 1346        | 0.511        | <b>23</b>        | <b>848</b> | <b>38</b>  | <b>672</b> | <b>0.008</b> |
| 0007635 | chemosensory behavior                                                             | 9                     | 1572        | 9             | 1399        | 0.992        | 2                | 869        | 7          | 703        | 0.099        |
| 0007622 | rhythmic behavior                                                                 | 8                     | 1573        | 7             | 1401        | 0.822        | 4                | 867        | 4          | 706        | 0.947        |
| 0048512 | circadian behavior                                                                | 8                     | 1573        | 6             | 1402        | 0.959        | 4                | 867        | 4          | 706        | 0.947        |
| 0009987 | cellular process                                                                  | 853                   | 728         | 775           | 633         | 0.575        | 459              | 412        | 394        | 316        | 0.29         |
| 0007154 | cell communication                                                                | 263                   | 1318        | 226           | 1182        | 0.703        | <b>107</b>       | <b>764</b> | <b>156</b> | <b>554</b> | <b>4E-07</b> |
| 0007155 | cell adhesion                                                                     | 51                    | 1530        | 39            | 1369        | 0.535        | <b>17</b>        | <b>854</b> | <b>34</b>  | <b>676</b> | <b>0.002</b> |
| 0008037 | cell recognition                                                                  | 2                     | 1579        | 0             | 1408        | 0.531        | 0                | 871        | 2          | 708        | 0.392        |
| 0008038 | neuronal cell recognition                                                         | 2                     | 1579        | 0             | 1408        | 0.531        | 0                | 871        | 2          | 708        | 0.392        |
| 0016337 | cell-cell adhesion                                                                | 22                    | 1559        | 17            | 1391        | 0.778        | 8                | 863        | 14         | 696        | 0.118        |
| 0016339 | calcium-dependent cell-cell adhesion                                              | 2                     | 1579        | 5             | 1403        | 0.362        | 1                | 870        | 1          | 709        | 0.571        |
| 0007156 | homophilic cell adhesion                                                          | 3                     | 1578        | 6             | 1402        | 0.399        | 1                | 870        | 2          | 708        | 0.859        |
| 0007160 | cell-matrix adhesion                                                              | 6                     | 1575        | 3             | 1405        | 0.621        | 2                | 869        | 4          | 706        | 0.508        |
| 0007267 | cell-cell signaling                                                               | 87                    | 1494        | 69            | 1339        | 0.511        | <b>30</b>        | <b>841</b> | <b>57</b>  | <b>653</b> | <b>1E-04</b> |
| 0019226 | transmission of nerve impulse                                                     | 79                    | 1502        | 59            | 1349        | 0.336        | <b>27</b>        | <b>844</b> | <b>52</b>  | <b>658</b> | <b>2E-04</b> |
| 0007268 | synaptic transmission                                                             | 59                    | 1522        | 42            | 1366        | 0.303        | <b>15</b>        | <b>856</b> | <b>44</b>  | <b>666</b> | <b>6E-06</b> |
| 0007270 | nerve-nerve synaptic transmission                                                 | 10                    | 1571        | 6             | 1402        | 0.603        | <b>1</b>         | <b>870</b> | <b>9</b>   | <b>701</b> | <b>0.011</b> |
| 0001505 | regulation of neurotransmitter levels                                             | 35                    | 1546        | 25            | 1383        | 0.47         | <b>12</b>        | <b>859</b> | <b>23</b>  | <b>687</b> | <b>0.02</b>  |
| 0042133 | neurotransmitter metabolism                                                       | 7                     | 1574        | 1             | 1407        | 0.108        | 3                | 868        | 4          | 706        | 0.786        |
| 0007269 | neurotransmitter secretion                                                        | 29                    | 1552        | 24            | 1384        | 0.897        | <b>10</b>        | <b>861</b> | <b>19</b>  | <b>691</b> | <b>0.039</b> |
| 0007165 | signal transduction                                                               | 198                   | 1383        | 181           | 1227        | 0.828        | <b>83</b>        | <b>788</b> | <b>115</b> | <b>595</b> | <b>9E-05</b> |
| 0007166 | cell surface receptor linked signal transduction                                  | 77                    | 1504        | 80            | 1328        | 0.363        | <b>33</b>        | <b>838</b> | <b>44</b>  | <b>666</b> | <b>0.036</b> |
| 0007167 | enzyme linked receptor protein signaling pathway                                  | 19                    | 1562        | 27            | 1381        | 0.15         | <b>5</b>         | <b>866</b> | <b>14</b>  | <b>696</b> | <b>0.021</b> |
| 0007178 | transmembrane receptor protein serine/threonine kinase signaling pathway          | 7                     | 1574        | 9             | 1399        | 0.629        | <b>0</b>         | <b>871</b> | <b>7</b>   | <b>703</b> | <b>0.011</b> |
| 0007179 | transforming growth factor beta receptor signaling pathway                        | 4                     | 1577        | 5             | 1403        | 0.862        | 0                | 871        | 4          | 706        | 0.086        |
| 0007169 | transmembrane receptor protein tyrosine kinase signaling pathway                  | 14                    | 1567        | 18            | 1390        | 0.388        | 5                | 866        | 9          | 701        | 0.232        |
| 0007173 | epidermal growth factor receptor signaling pathway                                | 2                     | 1579        | 6             | 1402        | 0.219        | 0                | 871        | 2          | 708        | 0.392        |
| 0008286 | insulin receptor signaling pathway                                                | 2                     | 1579        | 2             | 1406        | 0.7          | 0                | 871        | 2          | 708        | 0.392        |
| 0008293 | torso signaling pathway                                                           | 2                     | 1579        | 5             | 1403        | 0.362        | 0                | 871        | 2          | 708        | 0.392        |
| 0007186 | G-protein coupled receptor protein signaling pathway                              | 41                    | 1540        | 30            | 1378        | 0.478        | 17               | 854        | 24         | 686        | 0.106        |
| 0007200 | G-protein signaling, coupled to IP3 second messenger (phospholipase C activating) | 3                     | 1578        | 2             | 1406        | 0.897        | 2                | 869        | 1          | 709        | 0.859        |
| 0007219 | Notch signaling pathway                                                           | 6                     | 1575        | 7             | 1401        | 0.834        | 3                | 868        | 3          | 707        | 0.873        |
| 0007224 | smoothened signaling pathway                                                      | 4                     | 1577        | 2             | 1406        | 0.789        | 2                | 869        | 2          | 708        | 0.766        |
| 0008063 | Toll signaling pathway                                                            | 1                     | 1580        | 3             | 1405        | 0.537        | 1                | 870        | 0          | 710        | 0.918        |
| 0016055 | Wnt receptor signaling pathway                                                    | 9                     | 1572        | 7             | 1401        | 0.985        | 5                | 866        | 4          | 706        | 0.758        |
| 0007242 | intracellular signaling cascade                                                   | 92                    | 1489        | 90            | 1318        | 0.564        | <b>41</b>        | <b>830</b> | <b>51</b>  | <b>659</b> | <b>0.047</b> |
| 0007263 | nitric oxide mediated signal transduction                                         | 2                     | 1579        | 2             | 1406        | 0.7          | 0                | 871        | 2          | 708        | 0.392        |
| 0007243 | protein kinase cascade                                                            | 18                    | 1563        | 23            | 1385        | 0.315        | 8                | 863        | 10         | 700        | 0.5          |
| 0007259 | JAK-STAT cascade                                                                  | 3                     | 1578        | 3             | 1405        | 0.789        | 3                | 868        | 0          | 710        | 0.325        |
| 0000165 | MAPKKK cascade                                                                    | 15                    | 1566        | 18            | 1390        | 0.493        | 5                | 866        | 10         | 700        | 0.149        |
| 0019932 | second-messenger-mediated signaling                                               | 14                    | 1567        | 8             | 1400        | 0.424        | 5                | 866        | 9          | 701        | 0.232        |
| 0019722 | calcium-mediated signaling                                                        | 10                    | 1571        | 5             | 1403        | 0.417        | 3                | 868        | 7          | 703        | 0.2          |
| 0048015 | phosphoinositide-mediated signaling                                               | 3                     | 1578        | 2             | 1406        | 0.897        | 2                | 869        | 1          | 709        | 0.859        |
| 0007264 | small GTPase mediated signal transduction                                         | 23                    | 1558        | 21            | 1387        | 0.945        | 9                | 862        | 14         | 696        | 0.181        |
| 0007265 | Ras protein signal transduction                                                   | 5                     | 1576        | 5             | 1403        | 0.894        | 1                | 870        | 4          | 706        | 0.259        |
| 0009966 | regulation of signal transduction                                                 | 18                    | 1563        | 16            | 1392        | 0.867        | 10               | 861        | 8          | 702        | 0.843        |
| 0007275 | development                                                                       | 246                   | 1335        | 214           | 1194        | 0.824        | <b>116</b>       | <b>755</b> | <b>130</b> | <b>580</b> | <b>0.008</b> |
| 0007568 | aging                                                                             | 6                     | 1575        | 5             | 1403        | 0.847        | 4                | 867        | 2          | 708        | 0.873        |
| 0030154 | cell differentiation                                                              | 59                    | 1522        | 60            | 1348        | 0.519        | 25               | 846        | 34         | 676        | 0.062        |
| 0048468 | cell development                                                                  | 40                    | 1541        | 35            | 1373        | 0.968        | 16               | 855        | 24         | 686        | 0.075        |
| 0000904 | cellular morphogenesis during differentiation                                     | 12                    | 1569        | 7             | 1401        | 0.504        | 6                | 865        | 6          | 704        | 0.948        |
| 0042461 | photoreceptor cell development                                                    | 11                    | 1570        | 7             | 1401        | 0.643        | 5                | 866        | 6          | 704        | 0.733        |
| 0042051 | eye photoreceptor development (sensu Endopterygota)                               | 11                    | 1570        | 6             | 1402        | 0.462        | 5                | 866        | 6          | 704        | 0.733        |
| 0045165 | cell fate commitment                                                              | 22                    | 1559        | 27            | 1381        | 0.324        | 10               | 861        | 12         | 698        | 0.484        |

## Pre-foraging maturation (d1 → [d8, d12, d17])

| GO#     | GO term                                                        | Representational bias |             |               |             |              | Directional bias |            |            |            |              |
|---------|----------------------------------------------------------------|-----------------------|-------------|---------------|-------------|--------------|------------------|------------|------------|------------|--------------|
|         |                                                                | regulated             |             | not regulated |             | $\rho$       | up-reg.          |            | down-reg.  |            | $\rho$       |
|         |                                                                | term                  | n.term      | term          | n.term      |              | term             | n.term     | term       | n.term     |              |
| 0001709 | cell fate determination                                        | 17                    | 1564        | 13            | 1395        | 0.816        | 7                | 864        | 10         | 700        | 0.36         |
| 0007400 | neuroblast cell fate determination                             | 2                     | 1579        | 6             | 1402        | 0.219        | 2                | 869        | 0          | 710        | 0.571        |
| 0001708 | cell fate specification                                        | 3                     | 1578        | 5             | 1403        | 0.604        | 1                | 870        | 2          | 708        | 0.859        |
| 0007349 | cellularization                                                | 7                     | 1574        | 4             | 1404        | 0.68         | 1                | 870        | 6          | 704        | 0.073        |
| 0040007 | growth                                                         | 18                    | 1563        | 18            | 1390        | 0.856        | 8                | 863        | 10         | 700        | 0.5          |
| 0002164 | larval development                                             | 12                    | 1569        | 5             | 1403        | 0.222        | 6                | 865        | 6          | 704        | 0.948        |
| 0002165 | larval or pupal development (sensu Insecta)                    | 62                    | 1519        | 67            | 1341        | 0.301        | 32               | 839        | 30         | 680        | 0.666        |
| 0007552 | metamorphosis                                                  | 56                    | 1525        | 65            | 1343        | 0.163        | 29               | 842        | 27         | 683        | 0.712        |
| 0009653 | morphogenesis                                                  | 164                   | 1417        | 155           | 1253        | 0.616        | <b>72</b>        | <b>799</b> | <b>92</b>  | <b>618</b> | <b>0.003</b> |
| 0002009 | morphogenesis of an epithelium                                 | 19                    | 1562        | 25            | 1383        | 0.251        | <b>5</b>         | <b>866</b> | <b>14</b>  | <b>696</b> | <b>0.021</b> |
| 0009887 | organogenesis                                                  | 143                   | 1438        | 139           | 1269        | 0.478        | <b>64</b>        | <b>807</b> | <b>79</b>  | <b>631</b> | <b>0.012</b> |
| 0001654 | eye morphogenesis                                              | 29                    | 1552        | 28            | 1380        | 0.862        | 14               | 857        | 15         | 695        | 0.578        |
| 0008406 | gonad development                                              | 6                     | 1575        | 5             | 1403        | 0.847        | 5                | 866        | 1          | 709        | 0.326        |
| 0007444 | imaginal disc development                                      | 41                    | 1540        | 52            | 1356        | 0.105        | 21               | 850        | 20         | 690        | 0.729        |
| 0007494 | midgut development                                             | 2                     | 1579        | 3             | 1405        | 0.897        | 1                | 870        | 1          | 709        | 0.571        |
| 0007517 | muscle development                                             | 20                    | 1561        | 14            | 1394        | 0.6          | 7                | 864        | 13         | 697        | 0.111        |
| 0007399 | neurogenesis                                                   | 84                    | 1497        | 78            | 1330        | 0.848        | <b>33</b>        | <b>838</b> | <b>51</b>  | <b>659</b> | <b>0.004</b> |
| 0007409 | axonogenesis                                                   | 18                    | 1563        | 25            | 1383        | 0.192        | <b>5</b>         | <b>866</b> | <b>13</b>  | <b>697</b> | <b>0.035</b> |
| 0007411 | axon guidance                                                  | 13                    | 1568        | 20            | 1388        | 0.165        | 5                | 866        | 8          | 702        | 0.352        |
| 0007417 | central nervous system development                             | <b>14</b>             | <b>1567</b> | <b>25</b>     | <b>1383</b> | <b>0.048</b> | 8                | 863        | 6          | 704        | 0.909        |
| 0016358 | dendrite morphogenesis                                         | 6                     | 1575        | 8             | 1400        | 0.627        | 1                | 870        | 5          | 705        | 0.138        |
| 0042063 | gliogenesis                                                    | 5                     | 1576        | 6             | 1402        | 0.847        | 1                | 870        | 4          | 706        | 0.259        |
| 0007422 | peripheral nervous system development                          | 18                    | 1563        | 22            | 1386        | 0.397        | <b>5</b>         | <b>866</b> | <b>13</b>  | <b>697</b> | <b>0.035</b> |
| 0050767 | regulation of neurogenesis                                     | 3                     | 1578        | 2             | 1406        | 0.897        | 2                | 869        | 1          | 709        | 0.859        |
| 0007424 | tracheal system development (sensu Insecta)                    | 17                    | 1564        | 20            | 1388        | 0.493        | 5                | 866        | 12         | 698        | 0.058        |
| 0048513 | organ development                                              | 145                   | 1436        | 141           | 1267        | 0.472        | <b>66</b>        | <b>805</b> | <b>79</b>  | <b>631</b> | <b>0.019</b> |
| 0007389 | pattern specification                                          | 32                    | 1549        | 44            | 1364        | 0.073        | 12               | 859        | 20         | 690        | 0.066        |
| 0048066 | pigmentation                                                   | 9                     | 1572        | 2             | 1406        | 0.105        | 5                | 866        | 4          | 706        | 0.758        |
| 0009791 | post-embryonic development                                     | 12                    | 1569        | 5             | 1403        | 0.222        | 6                | 865        | 6          | 704        | 0.948        |
| 0009790 | embryonic development                                          | 51                    | 1530        | 49            | 1359        | 0.776        | 24               | 847        | 27         | 683        | 0.303        |
| 0007530 | sex determination                                              | 7                     | 1574        | 3             | 1405        | 0.442        | 4                | 867        | 3          | 707        | 0.786        |
| 0007548 | sex differentiation                                            | 13                    | 1568        | 6             | 1402        | 0.259        | 9                | 862        | 4          | 706        | 0.454        |
| 0019827 | stem cell maintenance                                          | 3                     | 1578        | 5             | 1403        | 0.604        | 1                | 870        | 2          | 708        | 0.859        |
| 0000003 | reproduction                                                   | 75                    | 1506        | 69            | 1339        | 0.909        | <b>30</b>        | <b>841</b> | <b>45</b>  | <b>665</b> | <b>0.01</b>  |
| 0050793 | regulation of development                                      | 22                    | 1559        | 21            | 1387        | 0.94         | 9                | 862        | 13         | 697        | 0.258        |
| 0007582 | physiological process                                          | 837                   | 744         | 768           | 640         | 0.4          | 462              | 409        | 375        | 335        | 0.969        |
| 0008152 | metabolism                                                     | 605                   | 976         | 561           | 847         | 0.398        | <b>369</b>       | <b>502</b> | <b>236</b> | <b>474</b> | <b>3E-04</b> |
| 0009056 | catabolism                                                     | <b>96</b>             | <b>1485</b> | <b>113</b>    | <b>1295</b> | <b>0.044</b> | 52               | 819        | 44         | 666        | 0.935        |
| 0006091 | energy pathways                                                | 60                    | 1521        | 48            | 1360        | 0.641        | <b>21</b>        | <b>850</b> | <b>39</b>  | <b>671</b> | <b>0.002</b> |
| 0006118 | electron transport                                             | 31                    | 1550        | 24            | 1384        | 0.701        | 13               | 858        | 18         | 692        | 0.192        |
| 0006139 | nucleobase, nucleoside, nucleotide and nucleic acid metabolism | 228                   | 1353        | 204           | 1204        | 1            | <b>157</b>       | <b>714</b> | <b>71</b>  | <b>639</b> | <b>9E-06</b> |
| 0006259 | DNA metabolism                                                 | 37                    | 1544        | 42            | 1366        | 0.328        | <b>27</b>        | <b>844</b> | <b>10</b>  | <b>700</b> | <b>0.041</b> |
| 0006350 | transcription                                                  | 118                   | 1463        | 109           | 1299        | 0.828        | <b>86</b>        | <b>785</b> | <b>32</b>  | <b>678</b> | <b>8E-05</b> |
| 0043170 | macromolecule metabolism                                       | <b>303</b>            | <b>1278</b> | <b>325</b>    | <b>1083</b> | <b>0.01</b>  | 173              | 698        | 130        | 580        | 0.474        |
| 0019538 | protein metabolism                                             | <b>255</b>            | <b>1326</b> | <b>272</b>    | <b>1136</b> | <b>0.025</b> | 147              | 724        | 108        | 602        | 0.408        |
| 0006412 | protein biosynthesis                                           | 66                    | 1515        | 44            | 1364        | 0.154        | 44               | 827        | 22         | 688        | 0.071        |
| 0006464 | protein modification                                           | <b>119</b>            | <b>1462</b> | <b>137</b>    | <b>1271</b> | <b>0.037</b> | 73               | 798        | 46         | 664        | 0.183        |
| 0006457 | protein folding                                                | 20                    | 1561        | 23            | 1385        | 0.49         | 9                | 862        | 11         | 699        | 0.492        |
| 0005975 | carbohydrate metabolism                                        | 54                    | 1527        | 53            | 1355        | 0.679        | 27               | 844        | 27         | 683        | 0.531        |
| 0006519 | amino acid and derivative metabolism                           | <b>47</b>             | <b>1534</b> | <b>23</b>     | <b>1385</b> | <b>0.022</b> | 29               | 842        | 18         | 692        | 0.438        |
| 0006629 | lipid metabolism                                               | 49                    | 1532        | 40            | 1368        | 0.759        | 32               | 839        | 17         | 693        | 0.189        |
| 0009308 | amine metabolism                                               | <b>54</b>             | <b>1527</b> | <b>27</b>     | <b>1381</b> | <b>0.016</b> | 31               | 840        | 23         | 687        | 0.835        |
| 0042440 | pigment metabolism                                             | 7                     | 1574        | 5             | 1403        | 0.929        | 5                | 866        | 2          | 708        | 0.624        |
| 0042445 | hormone metabolism                                             | 4                     | 1577        | 3             | 1405        | 0.878        | 3                | 868        | 1          | 709        | 0.766        |
| 0009058 | biosynthesis                                                   | <b>127</b>            | <b>1454</b> | <b>77</b>     | <b>1331</b> | <b>0.007</b> | 81               | 790        | 46         | 664        | 0.05         |
| 0019748 | secondary metabolism                                           | 8                     | 1573        | 6             | 1402        | 0.959        | 6                | 865        | 2          | 708        | 0.436        |
| 0019222 | regulation of metabolism                                       | 119                   | 1462        | 119           | 1289        | 0.387        | <b>77</b>        | <b>794</b> | <b>42</b>  | <b>668</b> | <b>0.036</b> |
| 0016265 | death                                                          | 45                    | 1536        | 41            | 1367        | 0.998        | 27               | 844        | 18         | 692        | 0.603        |
| 0008219 | cell death                                                     | 39                    | 1542        | 35            | 1373        | 0.933        | 23               | 848        | 16         | 694        | 0.741        |
| 0016271 | tissue death                                                   | 13                    | 1568        | 14            | 1394        | 0.762        | 6                | 865        | 7          | 703        | 0.711        |
| 0042592 | homeostasis                                                    | 12                    | 1569        | 17            | 1391        | 0.289        | 7                | 864        | 5          | 705        | 0.948        |
| 0019725 | cell homeostasis                                               | 11                    | 1570        | 15            | 1393        | 0.374        | 6                | 865        | 5          | 705        | 0.789        |
| 0050801 | ion homeostasis                                                | 8                     | 1573        | 6             | 1402        | 0.959        | 5                | 866        | 3          | 707        | 0.947        |
| 0043062 | extracellular structure organization and biogenesis            | 10                    | 1571        | 9             | 1399        | 0.836        | 3                | 868        | 7          | 703        | 0.2          |
| 0046903 | secretion                                                      | 51                    | 1530        | 50            | 1358        | 0.697        | <b>15</b>        | <b>856</b> | <b>36</b>  | <b>674</b> | <b>3E-04</b> |
| 0048511 | rhythmic process                                               | 8                     | 1573        | 9             | 1399        | 0.811        | 4                | 867        | 4          | 706        | 0.947        |

| GO#     | GO term                                                       | Representational bias |             |               |             |              | Directional bias |            |            |            |              |
|---------|---------------------------------------------------------------|-----------------------|-------------|---------------|-------------|--------------|------------------|------------|------------|------------|--------------|
|         |                                                               | regulated             |             | not regulated |             | $\rho$       | up-reg.          |            | down-reg.  |            | $\rho$       |
|         |                                                               | term                  | n_term      | term          | n_term      |              | term             | n_term     | term       | n_term     |              |
| 0050791 | regulation of physiological process                           | 178                   | 1403        | 169           | 1239        | 0.564        | 104              | 767        | 74         | 636        | 0.384        |
| 0050874 | organismal physiological process                              | 127                   | 1454        | 105           | 1303        | 0.604        | <b>54</b>        | <b>817</b> | <b>73</b>  | <b>637</b> | <b>0.004</b> |
| 0050875 | cellular physiological process                                | 787                   | 794         | 732           | 676         | 0.242        | 437              | 434        | 350        | 360        | 0.767        |
| 0006810 | transport                                                     | 225                   | 1356        | 173           | 1235        | 0.132        | <b>85</b>        | <b>786</b> | <b>140</b> | <b>570</b> | <b>3E-08</b> |
| 0006811 | ion transport                                                 | <b>86</b>             | <b>1495</b> | <b>34</b>     | <b>1374</b> | <b>4E-05</b> | <b>24</b>        | <b>847</b> | <b>62</b>  | <b>648</b> | <b>3E-07</b> |
| 0006818 | hydrogen transport                                            | 13                    | 1568        | 5             | 1403        | 0.158        | 1                | <b>870</b> | <b>12</b>  | <b>698</b> | <b>0.002</b> |
| 0006836 | neurotransmitter transport                                    | 3                     | 1578        | 2             | 1406        | 0.897        | 0                | 871        | 3          | 707        | 0.18         |
| 0006858 | extracellular transport                                       | 11                    | 1570        | 4             | 1404        | 0.183        | 4                | 867        | 7          | 703        | 0.343        |
| 0006869 | lipid transport                                               | 10                    | 1571        | 6             | 1402        | 0.603        | 3                | 868        | 7          | 703        | 0.2          |
| 0008643 | carbohydrate transport                                        | 11                    | 1570        | 4             | 1404        | 0.183        | 7                | 864        | 4          | 706        | 0.789        |
| 0015031 | protein transport                                             | 83                    | 1498        | 97            | 1311        | 0.071        | <b>31</b>        | <b>840</b> | <b>52</b>  | <b>658</b> | <b>0.001</b> |
| 0015837 | amine transport                                               | 9                     | 1572        | 3             | 1405        | 0.212        | 4                | 867        | 5          | 705        | 0.758        |
| 0015931 | nucleobase, nucleoside, nucleotide and nucleic acid transport | 7                     | 1574        | 6             | 1402        | 0.834        | 5                | 866        | 2          | 708        | 0.624        |
| 0016192 | vesicle-mediated transport                                    | 56                    | 1525        | 63            | 1345        | 0.227        | <b>15</b>        | <b>856</b> | <b>41</b>  | <b>669</b> | <b>3E-05</b> |
| 0045045 | secretory pathway                                             | 47                    | 1534        | 48            | 1360        | 0.566        | <b>14</b>        | <b>857</b> | <b>33</b>  | <b>677</b> | <b>7E-04</b> |
| 0046907 | intracellular transport                                       | 93                    | 1488        | 105           | 1303        | 0.098        | <b>35</b>        | <b>836</b> | <b>58</b>  | <b>652</b> | <b>7E-04</b> |
| 0051049 | regulation of transport                                       | 13                    | 1568        | 5             | 1403        | 0.158        | 1                | <b>870</b> | <b>12</b>  | <b>698</b> | <b>0.002</b> |
| 0008283 | cell proliferation                                            | 40                    | 1541        | 31            | 1377        | 0.64         | 21               | 850        | 19         | 691        | 0.863        |
| 0007049 | cell cycle                                                    | 70                    | 1511        | 58            | 1350        | 0.745        | 37               | 834        | 33         | 677        | 0.794        |
| 0017145 | stem cell division                                            | 5                     | 1576        | 7             | 1401        | 0.623        | 3                | 868        | 2          | 708        | 0.819        |
| 0016043 | cell organization and biogenesis                              | 136                   | 1445        | 139           | 1269        | 0.256        | 67               | 804        | 69         | 641        | 0.181        |
| 0000902 | cellular morphogenesis                                        | 38                    | 1543        | 42            | 1366        | 0.386        | 17               | 854        | 21         | 689        | 0.257        |
| 0006996 | organelle organization and biogenesis                         | 116                   | 1465        | 122           | 1286        | 0.204        | 54               | 817        | 62         | 648        | 0.068        |
| 0007010 | cytoskeleton organization and biogenesis                      | 85                    | 1496        | 85            | 1323        | 0.484        | <b>34</b>        | <b>837</b> | <b>51</b>  | <b>659</b> | <b>0.006</b> |
| 0006997 | nuclear organization and biogenesis                           | 3                     | 1578        | 7             | 1401        | 0.256        | 0                | 871        | 3          | 707        | 0.18         |
| 0007028 | cytoplasm organization and biogenesis                         | 10                    | 1571        | 9             | 1399        | 0.836        | 4                | 867        | 6          | 704        | 0.52         |
| 0016044 | membrane organization and biogenesis                          | 5                     | 1576        | 4             | 1404        | 0.862        | 2                | 869        | 3          | 707        | 0.819        |
| 0051128 | regulation of cell organization and biogenesis                | 6                     | 1575        | 5             | 1403        | 0.847        | 4                | 867        | 2          | 708        | 0.873        |
| 0016049 | cell growth                                                   | 2                     | 1579        | 7             | 1401        | 0.131        | 1                | 870        | 1          | 709        | 0.571        |
| 0050896 | response to stimulus                                          | 88                    | 1493        | 93            | 1315        | 0.266        | 50               | 821        | 38         | 672        | 0.822        |
| 0006950 | response to stress                                            | <b>19</b>             | <b>1562</b> | <b>40</b>     | <b>1368</b> | <b>0.002</b> | 12               | 859        | 7          | 703        | 0.632        |
| 0009408 | response to heat                                              | <b>1</b>              | <b>1580</b> | <b>9</b>      | <b>1399</b> | <b>0.016</b> | 1                | 870        | 0          | 710        | 0.918        |
| 0006979 | response to oxidative stress                                  | 1                     | 1580        | 1             | 1407        | 0.531        | 1                | 870        | 0          | 710        | 0.918        |
| 0051179 | localization                                                  | 243                   | 1338        | 186           | 1222        | 0.103        | <b>94</b>        | <b>777</b> | <b>149</b> | <b>561</b> | <b>3E-08</b> |
| 0006403 | RNA localization                                              | 18                    | 1563        | 14            | 1394        | 0.838        | 10               | 861        | 8          | 702        | 0.843        |
| 0008104 | protein localization                                          | 94                    | 1487        | 101           | 1307        | 0.2          | <b>35</b>        | <b>836</b> | <b>59</b>  | <b>651</b> | <b>5E-04</b> |
| 0051234 | establishment of localization                                 | 228                   | 1353        | 175           | 1233        | 0.124        | <b>86</b>        | <b>785</b> | <b>142</b> | <b>568</b> | <b>2E-08</b> |
| 0051235 | maintenance of localization                                   | 2                     | 1579        | 2             | 1406        | 0.7          | 2                | 869        | 0          | 710        | 0.571        |
| 0050789 | regulation of biological process                              | 204                   | 1377        | 199           | 1209        | 0.353        | 119              | 752        | 85         | 625        | 0.357        |
| 0050790 | regulation of enzyme activity                                 | 6                     | 1575        | 8             | 1400        | 0.627        | 4                | 867        | 2          | 708        | 0.873        |
| 0040029 | regulation of gene expression, epigenetic                     | 12                    | 1569        | 8             | 1400        | 0.679        | 8                | 863        | 4          | 706        | 0.605        |
| 0006306 | DNA methylation                                               | 5                     | 1576        | 2             | 1406        | 0.546        | 4                | 867        | 1          | 709        | 0.502        |
| 0045814 | negative regulation of gene expression, epigenetic            | 4                     | 1577        | 3             | 1405        | 0.878        | 2                | 869        | 2          | 708        | 0.766        |
| 0006342 | chromatin silencing                                           | 4                     | 1577        | 3             | 1405        | 0.878        | 2                | 869        | 2          | 708        | 0.766        |
| 0003674 | molecular_function                                            | 927                   | 654         | 805           | 603         | 0.441        | 500              | 371        | 427        | 283        | 0.295        |
| 0016209 | antioxidant activity                                          | 4                     | 1577        | 5             | 1403        | 0.862        | 3                | 868        | 1          | 709        | 0.766        |
| 0005488 | binding                                                       | 527                   | 1054        | 480           | 928         | 0.69         | 296              | 575        | 231        | 479        | 0.579        |
| 0005509 | calcium ion binding                                           | 31                    | 1550        | 30            | 1378        | 0.843        | 16               | 855        | 15         | 695        | 0.833        |
| 0030246 | carbohydrate binding                                          | 11                    | 1570        | 4             | 1404        | 0.183        | 3                | 868        | 8          | 702        | 0.119        |
| 0008289 | lipid binding                                                 | 17                    | 1564        | 9             | 1399        | 0.278        | 12               | 859        | 5          | 705        | 0.295        |
| 0003676 | nucleic acid binding                                          | 211                   | 1370        | 178           | 1230        | 0.606        | <b>145</b>       | <b>726</b> | <b>66</b>  | <b>644</b> | <b>3E-05</b> |
| 0003677 | DNA binding                                                   | 104                   | 1477        | 90            | 1318        | 0.895        | <b>74</b>        | <b>797</b> | <b>30</b>  | <b>680</b> | <b>9E-04</b> |
| 0003682 | chromatin binding                                             | 13                    | 1568        | 10            | 1398        | 0.888        | 11               | 860        | 2          | 708        | 0.062        |
| 0003700 | transcription factor activity                                 | 48                    | 1533        | 38            | 1370        | 0.659        | 29               | 842        | 19         | 691        | 0.545        |
| 0003723 | RNA binding                                                   | 70                    | 1511        | 49            | 1359        | 0.219        | <b>49</b>        | <b>822</b> | <b>21</b>  | <b>689</b> | <b>0.015</b> |
| 0008135 | translation factor activity, nucleic acid binding             | 19                    | 1562        | 16            | 1392        | 0.996        | 12               | 859        | 7          | 703        | 0.632        |
| 0000166 | nucleotide binding                                            | 136                   | 1445        | 119           | 1289        | 0.935        | 75               | 796        | 61         | 649        | 0.939        |
| 0005515 | protein binding                                               | <b>180</b>            | <b>1401</b> | <b>199</b>    | <b>1209</b> | <b>0.028</b> | 90               | 781        | 90         | 620        | 0.168        |
| 0008134 | transcription factor binding                                  | 11                    | 1570        | 20            | 1388        | 0.077        | 9                | 862        | 2          | 708        | 0.138        |
| 0008092 | cytoskeletal protein binding                                  | 43                    | 1538        | 45            | 1363        | 0.509        | 19               | 852        | 24         | 686        | 0.193        |
| 0003779 | actin binding                                                 | 29                    | 1552        | 24            | 1384        | 0.897        | 14               | 857        | 15         | 695        | 0.578        |
| 0003824 | catalytic activity                                            | 445                   | 1136        | 394           | 1014        | 0.953        | 246              | 625        | 199        | 511        | 0.969        |
| 0016787 | hydrolase activity                                            | 197                   | 1384        | 175           | 1233        | 0.976        | 96               | 775        | 101        | 609        | 0.066        |
| 0003924 | GTPase activity                                               | 24                    | 1557        | 16            | 1392        | 0.455        | 9                | 862        | 15         | 695        | 0.124        |
| 0004518 | nuclease activity                                             | 5                     | 1576        | 10            | 1398        | 0.207        | 4                | 867        | 1          | 709        | 0.502        |

## Pre-foraging maturation (d1 → [d8, d12, d17])

| GO#     | GO term                                    | Representational bias |             |               |             |              | Directional bias |            |            |            |              |
|---------|--------------------------------------------|-----------------------|-------------|---------------|-------------|--------------|------------------|------------|------------|------------|--------------|
|         |                                            | regulated             |             | not regulated |             | <i>p</i>     | up-reg.          |            | down-reg.  |            | <i>p</i>     |
|         |                                            | term                  | n.term      | term          | n.term      |              | term             | n.term     | term       | n.term     |              |
| 0008233 | peptidase activity                         | <b>50</b>             | <b>1531</b> | <b>68</b>     | <b>1340</b> | <b>0.025</b> | 26               | 845        | 24         | 686        | 0.763        |
| 0004721 | phosphoprotein phosphatase activity        | 13                    | 1568        | 17            | 1391        | 0.384        | 7                | 864        | 6          | 704        | 0.85         |
| 0016740 | transferase activity                       | 122                   | 1459        | 119           | 1289        | 0.503        | <b>80</b>        | <b>791</b> | <b>42</b>  | <b>668</b> | <b>0.02</b>  |
| 0016301 | kinase activity                            | 67                    | 1514        | 68            | 1340        | 0.491        | 36               | 835        | 31         | 679        | 0.918        |
| 0004672 | protein kinase activity                    | 49                    | 1532        | 46            | 1362        | 0.876        | 27               | 844        | 22         | 688        | 0.885        |
| 0030234 | enzyme regulator activity                  | <b>43</b>             | <b>1538</b> | <b>62</b>     | <b>1346</b> | <b>0.017</b> | 21               | 850        | 22         | 688        | 0.496        |
| 0003774 | motor activity                             | 14                    | 1567        | 14            | 1394        | 0.906        | 4                | 867        | 10         | 700        | 0.083        |
| 0004871 | signal transducer activity                 | 145                   | 1436        | 111           | 1297        | 0.234        | <b>67</b>        | <b>804</b> | <b>78</b>  | <b>632</b> | <b>0.03</b>  |
| 0004872 | receptor activity                          | 60                    | 1521        | 49            | 1359        | 0.718        | <b>22</b>        | <b>849</b> | <b>38</b>  | <b>672</b> | <b>0.005</b> |
| 0004879 | ligand-dependent nuclear receptor activity | 7                     | 1574        | 2             | 1406        | 0.245        | 4                | 867        | 3          | 707        | 0.786        |
| 0004888 | transmembrane receptor activity            | 38                    | 1543        | 36            | 1372        | 0.88         | <b>9</b>         | <b>862</b> | <b>29</b>  | <b>681</b> | <b>2E-04</b> |
| 0004930 | G-protein coupled receptor activity        | 16                    | 1565        | 14            | 1394        | 0.892        | <b>4</b>         | <b>867</b> | <b>12</b>  | <b>698</b> | <b>0.029</b> |
| 0005057 | receptor signaling protein activity        | 41                    | 1540        | 39            | 1369        | 0.853        | 24               | 847        | 17         | 693        | 0.772        |
| 0005102 | receptor binding                           | 37                    | 1544        | 32            | 1376        | 0.999        | 18               | 853        | 19         | 691        | 0.529        |
| 0005198 | structural molecule activity               | 91                    | 1490        | 71            | 1337        | 0.436        | <b>39</b>        | <b>832</b> | <b>52</b>  | <b>658</b> | <b>0.021</b> |
| 0030528 | transcription regulator activity           | 98                    | 1483        | 101           | 1307        | 0.32         | <b>71</b>        | <b>800</b> | <b>27</b>  | <b>683</b> | <b>5E-04</b> |
| 0045182 | translation regulator activity             | 19                    | 1562        | 16            | 1392        | 0.996        | 12               | 859        | 7          | 703        | 0.632        |
| 0005215 | transporter activity                       | <b>157</b>            | <b>1424</b> | <b>96</b>     | <b>1312</b> | <b>0.003</b> | <b>58</b>        | <b>813</b> | <b>99</b>  | <b>611</b> | <b>2E-06</b> |
| 0005489 | electron transporter activity              | 18                    | 1563        | 11            | 1397        | 0.419        | 7                | 864        | 11         | 699        | 0.249        |
| 0005216 | ion channel activity                       | <b>36</b>             | <b>1545</b> | <b>16</b>     | <b>1392</b> | <b>0.025</b> | <b>10</b>        | <b>861</b> | <b>26</b>  | <b>684</b> | <b>0.002</b> |
| 0005244 | voltage-gated ion channel activity         | 18                    | 1563        | 8             | 1400        | 0.139        | <b>3</b>         | <b>868</b> | <b>15</b>  | <b>695</b> | <b>0.002</b> |
| 0005575 | cellular_component                         | 650                   | 931         | 573           | 835         | 0.846        | <b>321</b>       | <b>550</b> | <b>329</b> | <b>381</b> | <b>2E-04</b> |
| 0005623 | cell                                       | 587                   | 994         | 525           | 883         | 0.959        | <b>289</b>       | <b>582</b> | <b>298</b> | <b>412</b> | <b>4E-04</b> |
| 0005622 | intracellular                              | 436                   | 1145        | 421           | 987         | 0.173        | 233              | 638        | 203        | 507        | 0.448        |
| 0005737 | cytoplasm                                  | 230                   | 1351        | 228           | 1180        | 0.232        | <b>101</b>       | <b>770</b> | <b>129</b> | <b>581</b> | <b>3E-04</b> |
| 0016023 | cytoplasmic vesicle                        | 20                    | 1561        | 21            | 1387        | 0.709        | <b>6</b>         | <b>865</b> | <b>14</b>  | <b>696</b> | <b>0.041</b> |
| 0005829 | cytosol                                    | <b>30</b>             | <b>1551</b> | <b>49</b>     | <b>1359</b> | <b>0.01</b>  | 13               | 858        | 17         | 693        | 0.262        |
| 0005783 | endoplasmic reticulum                      | 26                    | 1555        | 31            | 1377        | 0.328        | 14               | 857        | 12         | 698        | 0.944        |
| 0005794 | Golgi apparatus                            | 9                     | 1572        | 16            | 1392        | 0.134        | 3                | 868        | 6          | 704        | 0.327        |
| 0005815 | microtubule organizing center              | 3                     | 1578        | 6             | 1402        | 0.399        | 2                | 869        | 1          | 709        | 0.859        |
| 0005739 | mitochondrion                              | 60                    | 1521        | 45            | 1363        | 0.43         | <b>24</b>        | <b>847</b> | <b>36</b>  | <b>674</b> | <b>0.024</b> |
| 0005840 | ribosome                                   | 15                    | 1566        | 9             | 1399        | 0.459        | 10               | 861        | 5          | 705        | 0.519        |
| 0005773 | vacuole                                    | 8                     | 1573        | 6             | 1402        | 0.959        | <b>0</b>         | <b>871</b> | <b>8</b>   | <b>702</b> | <b>0.005</b> |
| 0005764 | lysosome                                   | 2                     | 1579        | 3             | 1405        | 0.897        | 0                | 871        | 2          | 708        | 0.392        |
| 0005856 | cytoskeleton                               | 46                    | 1535        | 39            | 1369        | 0.905        | <b>16</b>        | <b>855</b> | <b>30</b>  | <b>680</b> | <b>0.008</b> |
| 0005694 | chromosome                                 | 22                    | 1559        | 18            | 1390        | 0.913        | 15               | 856        | 7          | 703        | 0.304        |
| 0000228 | nuclear chromosome                         | 2                     | 1579        | 3             | 1405        | 0.897        | 1                | 870        | 1          | 709        | 0.571        |
| 0005634 | nucleus                                    | 184                   | 1397        | 188           | 1220        | 0.173        | <b>128</b>       | <b>743</b> | <b>56</b>  | <b>654</b> | <b>4E-05</b> |
| 0005635 | nuclear membrane                           | 8                     | 1573        | 9             | 1399        | 0.811        | 5                | 866        | 3          | 707        | 0.947        |
| 0005730 | nucleolus                                  | 5                     | 1576        | 6             | 1402        | 0.847        | 3                | 868        | 2          | 708        | 0.819        |
| 0005654 | nucleoplasm                                | 35                    | 1546        | 37            | 1371        | 0.537        | <b>26</b>        | <b>845</b> | <b>9</b>   | <b>701</b> | <b>0.033</b> |
| 0005777 | peroxisome                                 | 6                     | 1575        | 3             | 1405        | 0.621        | 5                | 866        | 1          | 709        | 0.326        |
| 0005886 | plasma membrane                            | 89                    | 1492        | 67            | 1341        | 0.324        | <b>27</b>        | <b>844</b> | <b>62</b>  | <b>648</b> | <b>2E-06</b> |
| 0005576 | extracellular region                       | <b>53</b>             | <b>1528</b> | <b>23</b>     | <b>1385</b> | <b>0.004</b> | 22               | 849        | 31         | 679        | 0.06         |
| 0005578 | extracellular matrix (sensu Metazoa)       | <b>26</b>             | <b>1555</b> | <b>9</b>      | <b>1399</b> | <b>0.017</b> | 7                | 864        | 19         | 691        | 0.007        |

## Hive bee-to-forager ([d8, d12, d17] → d17F)

| GO#     | GO term                                                                           | Representational bias |             |               |             |              | Directional bias |        |           |        |       |
|---------|-----------------------------------------------------------------------------------|-----------------------|-------------|---------------|-------------|--------------|------------------|--------|-----------|--------|-------|
|         |                                                                                   | regulated             |             | not regulated |             | p            | up-reg.          |        | down-reg. |        | p     |
|         |                                                                                   | term                  | n.term      | term          | n.term      |              | term             | n.term | term      | n.term |       |
| 0008150 | biological_process                                                                | 917                   | 630         | 837           | 605         | 0.518        | 464              | 341    | 453       | 289    | 0.189 |
| 0007610 | behavior                                                                          | 91                    | 1456        | 71            | 1371        | 0.282        | 45               | 760    | 46        | 696    | 0.689 |
| 0030534 | adult behavior                                                                    | 14                    | 1533        | 10            | 1432        | 0.658        | 5                | 800    | 9         | 733    | 0.337 |
| 0030537 | larval behavior                                                                   | 6                     | 1541        | 3             | 1439        | 0.574        | 3                | 802    | 3         | 739    | 0.757 |
| 0007611 | learning and/or memory                                                            | 16                    | 1531        | 8             | 1434        | 0.207        | 7                | 798    | 9         | 733    | 0.678 |
| 0007612 | learning                                                                          | 10                    | 1537        | 5             | 1437        | 0.368        | 4                | 801    | 6         | 736    | 0.655 |
| 0007613 | memory                                                                            | 8                     | 1539        | 3             | 1439        | 0.275        | 5                | 800    | 3         | 739    | 0.811 |
| 0007626 | locomotory behavior                                                               | 69                    | 1478        | 54            | 1388        | 0.372        | 35               | 770    | 34        | 708    | 0.92  |
| 0007635 | chemosensory behavior                                                             | 11                    | 1536        | 7             | 1435        | 0.575        | 5                | 800    | 6         | 736    | 0.892 |
| 0007622 | rhythmic behavior                                                                 | 10                    | 1537        | 5             | 1437        | 0.368        | 6                | 799    | 4         | 738    | 0.851 |
| 0048512 | circadian behavior                                                                | 10                    | 1537        | 4             | 1438        | 0.227        | 6                | 799    | 4         | 738    | 0.851 |
| 0009987 | cellular process                                                                  | 849                   | 698         | 779           | 663         | 0.664        | 431              | 374    | 418       | 324    | 0.293 |
| 0007154 | cell communication                                                                | 271                   | 1276        | 218           | 1224        | 0.085        | 144              | 661    | 127       | 615    | 0.74  |
| 0007155 | cell adhesion                                                                     | 55                    | 1492        | 35            | 1407        | 0.09         | 26               | 779    | 29        | 713    | 0.56  |
| 0008037 | cell recognition                                                                  | 1                     | 1546        | 1             | 1441        | 0.511        | 0                | 805    | 1         | 741    | 0.967 |
| 0008038 | neuronal cell recognition                                                         | 1                     | 1546        | 1             | 1441        | 0.511        | 0                | 805    | 1         | 741    | 0.967 |
| 0016337 | cell-cell adhesion                                                                | 24                    | 1523        | 15            | 1427        | 0.285        | 12               | 793    | 12        | 730    | 0.996 |
| 0016339 | calcium-dependent cell-cell adhesion                                              | 4                     | 1543        | 3             | 1439        | 0.926        | 3                | 802    | 1         | 741    | 0.675 |
| 0007156 | homophilic cell adhesion                                                          | 5                     | 1542        | 4             | 1438        | 0.916        | 3                | 802    | 2         | 740    | 0.927 |
| 0007160 | cell-matrix adhesion                                                              | 4                     | 1543        | 5             | 1437        | 0.916        | 1                | 804    | 3         | 739    | 0.56  |
| 0007267 | cell-cell signaling                                                               | 91                    | 1456        | 65            | 1377        | 0.108        | 45               | 760    | 46        | 696    | 0.689 |
| 0019226 | transmission of nerve impulse                                                     | 80                    | 1467        | 58            | 1384        | 0.159        | 38               | 767    | 42        | 700    | 0.472 |
| 0007268 | synaptic transmission                                                             | 57                    | 1490        | 44            | 1398        | 0.392        | 29               | 776    | 28        | 714    | 0.965 |
| 0007270 | nerve-nerve synaptic transmission                                                 | 5                     | 1542        | 11            | 1431        | 0.163        | 2                | 803    | 3         | 739    | 0.927 |
| 0001505 | regulation of neurotransmitter levels                                             | 35                    | 1512        | 25            | 1417        | 0.368        | 19               | 786    | 16        | 726    | 0.922 |
| 0042133 | neurotransmitter metabolism                                                       | 5                     | 1542        | 3             | 1439        | 0.799        | 3                | 802    | 2         | 740    | 0.927 |
| 0007269 | neurotransmitter secretion                                                        | 30                    | 1517        | 23            | 1419        | 0.566        | 16               | 789    | 14        | 728    | 0.967 |
| 0007165 | signal transduction                                                               | 208                   | 1339        | 171           | 1271        | 0.212        | 118              | 687    | 90        | 652    | 0.167 |
| 0007166 | cell surface receptor linked signal transduction                                  | 83                    | 1464        | 74            | 1368        | 0.838        | 46               | 759    | 37        | 705    | 0.602 |
| 0007167 | enzyme linked receptor protein signaling pathway                                  | 25                    | 1522        | 21            | 1421        | 0.837        | 13               | 792    | 12        | 730    | 0.843 |
| 0007178 | transmembrane receptor protein serine/threonine kinase signaling pathway          | 11                    | 1536        | 5             | 1437        | 0.266        | 5                | 800    | 6         | 736    | 0.892 |
| 0007179 | transforming growth factor beta receptor signaling pathway                        | 6                     | 1541        | 3             | 1439        | 0.574        | 4                | 801    | 2         | 740    | 0.757 |
| 0007169 | transmembrane receptor protein tyrosine kinase signaling pathway                  | 15                    | 1532        | 17            | 1425        | 0.706        | 8                | 797    | 7         | 735    | 0.874 |
| 0007173 | epidermal growth factor receptor signaling pathway                                | 4                     | 1543        | 4             | 1438        | 0.799        | 3                | 802    | 1         | 741    | 0.675 |
| 0008286 | insulin receptor signaling pathway                                                | 1                     | 1546        | 3             | 1439        | 0.568        | 0                | 805    | 1         | 741    | 0.967 |
| 0008293 | torso signaling pathway                                                           | 3                     | 1544        | 4             | 1438        | 0.926        | 3                | 802    | 0         | 742    | 0.277 |
| 0007186 | G-protein coupled receptor protein signaling pathway                              | 38                    | 1509        | 33            | 1409        | 0.856        | 19               | 786    | 19        | 723    | 0.928 |
| 0007200 | G-protein signaling, coupled to IP3 second messenger (phospholipase C activating) | 3                     | 1544        | 2             | 1440        | 0.937        | 1                | 804    | 2         | 740    | 0.944 |
| 0007219 | Notch signaling pathway                                                           | 8                     | 1539        | 5             | 1437        | 0.668        | 5                | 800    | 3         | 739    | 0.811 |
| 0007224 | smoothed signaling pathway                                                        | 4                     | 1543        | 2             | 1440        | 0.747        | 2                | 803    | 2         | 740    | 0.675 |
| 0008063 | Toll signaling pathway                                                            | 2                     | 1545        | 2             | 1440        | 0.667        | 2                | 803    | 0         | 742    | 0.515 |
| 0016055 | Wnt receptor signaling pathway                                                    | 6                     | 1541        | 10            | 1432        | 0.372        | 4                | 801    | 2         | 740    | 0.757 |
| 0007242 | intracellular signaling cascade                                                   | <b>109</b>            | <b>1438</b> | <b>73</b>     | <b>1369</b> | <b>0.029</b> | 62               | 743    | 47        | 695    | 0.342 |
| 0007263 | nitric oxide mediated signal transduction                                         | 1                     | 1546        | 3             | 1439        | 0.568        | 1                | 804    | 0         | 742    | 0.967 |
| 0007243 | protein kinase cascade                                                            | 21                    | 1526        | 20            | 1422        | 0.93         | 12               | 793    | 9         | 733    | 0.801 |
| 0007259 | JAK-STAT cascade                                                                  | 3                     | 1544        | 3             | 1439        | 0.747        | 2                | 803    | 1         | 741    | 0.944 |
| 0000165 | MAPKKK cascade                                                                    | 17                    | 1530        | 16            | 1426        | 0.883        | 10               | 795    | 7         | 735    | 0.75  |
| 0019932 | second-messenger-mediated signaling                                               | 13                    | 1534        | 9             | 1433        | 0.633        | 5                | 800    | 8         | 734    | 0.481 |
| 0019722 | calcium-mediated signaling                                                        | 7                     | 1540        | 8             | 1434        | 0.891        | 2                | 803    | 5         | 737    | 0.386 |
| 0048015 | phosphoinositide-mediated signaling                                               | 3                     | 1544        | 2             | 1440        | 0.937        | 1                | 804    | 2         | 740    | 0.944 |
| 0007264 | small GTPase mediated signal transduction                                         | 22                    | 1525        | 22            | 1420        | 0.934        | 11               | 794    | 11        | 731    | 0.982 |
| 0007265 | Ras protein signal transduction                                                   | 6                     | 1541        | 4             | 1438        | 0.837        | 1                | 804    | 5         | 737    | 0.184 |
| 0009966 | regulation of signal transduction                                                 | 20                    | 1527        | 14            | 1428        | 0.511        | 14               | 791    | 6         | 736    | 0.164 |
| 0007275 | development                                                                       | 251                   | 1296        | 209           | 1233        | 0.208        | 129              | 676    | 122       | 620    | 0.878 |
| 0007568 | aging                                                                             | 6                     | 1541        | 5             | 1437        | 0.907        | 4                | 801    | 2         | 740    | 0.757 |
| 0030154 | cell differentiation                                                              | 61                    | 1486        | 58            | 1384        | 0.987        | 31               | 774    | 30        | 712    | 0.95  |
| 0048468 | cell development                                                                  | 42                    | 1505        | 33            | 1409        | 0.53         | 22               | 783    | 20        | 722    | 0.911 |
| 0000904 | cellular morphogenesis during differentiation                                     | 11                    | 1536        | 8             | 1434        | 0.759        | 9                | 796    | 2         | 740    | 0.093 |
| 0042461 | photoreceptor cell development                                                    | 10                    | 1537        | 8             | 1434        | 0.931        | 8                | 797    | 2         | 740    | 0.145 |
| 0042051 | eye photoreceptor development (sensu Endopterygota)                               | 9                     | 1538        | 8             | 1434        | 0.884        | 7                | 798    | 2         | 740    | 0.224 |
| 0045165 | cell fate commitment                                                              | 22                    | 1525        | 27            | 1415        | 0.41         | 13               | 792    | 9         | 733    | 0.651 |

## Hive bee-to-forager (d8, d12, d17) → d17F)

| GO#     | GO term                                                        | Representational bias |             |               |             |              | Directional bias |            |           |            |              |
|---------|----------------------------------------------------------------|-----------------------|-------------|---------------|-------------|--------------|------------------|------------|-----------|------------|--------------|
|         |                                                                | regulated             |             | not regulated |             | p            | up-reg.          |            | down-reg. |            | p            |
|         |                                                                | term                  | n.term      | term          | n.term      |              | term             | n.term     | term      | n.term     |              |
| 0001709 | cell fate determination                                        | 10                    | 1537        | 20            | 1422        | 0.065        | 6                | 799        | 4         | 738        | 0.851        |
| 0007400 | neuroblast cell fate determination                             | 4                     | 1543        | 4             | 1438        | 0.799        | 2                | 803        | 2         | 740        | 0.675        |
| 0001708 | cell fate specification                                        | 2                     | 1545        | 6             | 1436        | 0.245        | 2                | 803        | 0         | 742        | 0.515        |
| 0007349 | cellularization                                                | 5                     | 1542        | 6             | 1436        | 0.907        | 2                | 803        | 3         | 739        | 0.927        |
| 0040007 | growth                                                         | 21                    | 1526        | 15            | 1427        | 0.531        | 12               | 793        | 9         | 733        | 0.801        |
| 0002164 | larval development                                             | 10                    | 1537        | 7             | 1435        | 0.733        | 7                | 798        | 3         | 739        | 0.41         |
| 0002165 | larval or pupal development (sensu Insecta)                    | <b>83</b>             | <b>1464</b> | <b>46</b>     | <b>1396</b> | <b>0.005</b> | 47               | 758        | 36        | 706        | 0.455        |
| 0007552 | metamorphosis                                                  | <b>78</b>             | <b>1469</b> | <b>43</b>     | <b>1399</b> | <b>0.006</b> | 45               | 760        | 33        | 709        | 0.363        |
| 0009653 | morphogenesis                                                  | 170                   | 1377        | 149           | 1293        | 0.602        | 93               | 712        | 77        | 665        | 0.511        |
| 0002009 | morphogenesis of an epithelium                                 | 23                    | 1524        | 21            | 1421        | 0.934        | 13               | 792        | 10        | 732        | 0.823        |
| 0009887 | organogenesis                                                  | 151                   | 1396        | 131           | 1311        | 0.569        | 82               | 723        | 69        | 673        | 0.616        |
| 0001654 | eye morphogenesis                                              | 33                    | 1514        | 24            | 1418        | 0.422        | 22               | 783        | 11        | 731        | 0.127        |
| 0008406 | gonad development                                              | 5                     | 1542        | 6             | 1436        | 0.907        | 3                | 802        | 2         | 740        | 0.927        |
| 0007444 | imaginal disc development                                      | 51                    | 1496        | 42            | 1400        | 0.618        | 31               | 774        | 20        | 722        | 0.259        |
| 0007494 | midgut development                                             | 1                     | 1546        | 4             | 1438        | 0.33         | 0                | 805        | 1         | 741        | 0.967        |
| 0007517 | muscle development                                             | 15                    | 1532        | 19            | 1423        | 0.469        | 8                | 797        | 7         | 735        | 0.874        |
| 0007399 | neurogenesis                                                   | 84                    | 1463        | 78            | 1364        | 0.955        | 45               | 760        | 39        | 703        | 0.859        |
| 0007409 | axonogenesis                                                   | 21                    | 1526        | 22            | 1420        | 0.816        | 10               | 795        | 11        | 731        | 0.851        |
| 0007411 | axon guidance                                                  | 16                    | 1531        | 17            | 1425        | 0.839        | 9                | 796        | 7         | 735        | 0.93         |
| 0007417 | central nervous system development                             | 19                    | 1528        | 20            | 1422        | 0.825        | 10               | 795        | 9         | 733        | 0.858        |
| 0016358 | dendrite morphogenesis                                         | 4                     | 1543        | 10            | 1432        | 0.141        | 1                | 804        | 3         | 739        | 0.56         |
| 0042063 | gliogenesis                                                    | 4                     | 1543        | 7             | 1435        | 0.471        | 1                | 804        | 3         | 739        | 0.56         |
| 0007422 | peripheral nervous system development                          | 16                    | 1531        | 24            | 1418        | 0.181        | 11               | 794        | 5         | 737        | 0.274        |
| 0050767 | regulation of neurogenesis                                     | 1                     | 1546        | 4             | 1438        | 0.33         | 0                | 805        | 1         | 741        | 0.967        |
| 0007424 | tracheal system development (sensu Insecta)                    | 17                    | 1530        | 20            | 1422        | 0.585        | 11               | 794        | 6         | 736        | 0.419        |
| 0048513 | organ development                                              | 154                   | 1393        | 132           | 1310        | 0.496        | 84               | 721        | 70        | 672        | 0.567        |
| 0007389 | pattern specification                                          | 33                    | 1514        | 43            | 1399        | 0.175        | 18               | 787        | 15        | 727        | 0.908        |
| 0048066 | pigmentation                                                   | 6                     | 1541        | 5             | 1437        | 0.907        | 5                | 800        | 1         | 741        | 0.259        |
| 0009791 | post-embryonic development                                     | 10                    | 1537        | 7             | 1435        | 0.733        | 7                | 798        | 3         | 739        | 0.41         |
| 0009790 | embryonic development                                          | 49                    | 1498        | 51            | 1391        | 0.646        | 32               | 773        | 17        | 725        | 0.081        |
| 0007530 | sex determination                                              | 5                     | 1542        | 5             | 1437        | 0.837        | 2                | 803        | 3         | 739        | 0.927        |
| 0007548 | sex differentiation                                            | 9                     | 1538        | 10            | 1432        | 0.878        | 6                | 799        | 3         | 739        | 0.585        |
| 0019827 | stem cell maintenance                                          | 6                     | 1541        | 2             | 1440        | 0.335        | 4                | 801        | 2         | 740        | 0.757        |
| 0000003 | reproduction                                                   | 76                    | 1471        | 68            | 1374        | 0.868        | 41               | 764        | 35        | 707        | 0.823        |
| 0050793 | regulation of development                                      | 19                    | 1528        | 24            | 1418        | 0.397        | 10               | 795        | 9         | 733        | 0.858        |
| 0007582 | physiological process                                          | 833                   | 714         | 772           | 670         | 0.894        | 422              | 383        | 411       | 331        | 0.263        |
| 0008152 | metabolism                                                     | 605                   | 942         | 561           | 881         | 0.939        | 300              | 505        | 305       | 437        | 0.135        |
| 0009056 | catabolism                                                     | 119                   | 1428        | 90            | 1352        | 0.138        | 57               | 748        | 62        | 680        | 0.398        |
| 0006091 | energy pathways                                                | 60                    | 1487        | 48            | 1394        | 0.48         | <b>18</b>        | <b>787</b> | <b>42</b> | <b>700</b> | <b>8E-04</b> |
| 0006118 | electron transport                                             | 29                    | 1518        | 26            | 1416        | 0.993        | <b>8</b>         | <b>797</b> | <b>21</b> | <b>721</b> | <b>0.013</b> |
| 0006139 | nucleobase, nucleoside, nucleotide and nucleic acid metabolism | 226                   | 1321        | 206           | 1236        | 0.842        | 123              | 682        | 103       | 639        | 0.48         |
| 0006259 | DNA metabolism                                                 | 42                    | 1505        | 37            | 1405        | 0.889        | 18               | 787        | 24        | 718        | 0.293        |
| 0006350 | transcription                                                  | <b>133</b>            | <b>1414</b> | <b>94</b>     | <b>1348</b> | <b>0.038</b> | 76               | 729        | 57        | 685        | 0.253        |
| 0043170 | macromolecule metabolism                                       | 322                   | 1225        | 306           | 1136        | 0.82         | 158              | 647        | 164       | 578        | 0.256        |
| 0019538 | protein metabolism                                             | 273                   | 1274        | 254           | 1188        | 0.98         | 134              | 671        | 139       | 603        | 0.313        |
| 0006412 | protein biosynthesis                                           | 52                    | 1495        | 58            | 1384        | 0.389        | 22               | 783        | 30        | 712        | 0.198        |
| 0006464 | protein modification                                           | 139                   | 1408        | 117           | 1325        | 0.432        | 74               | 731        | 65        | 677        | 0.835        |
| 0006457 | protein folding                                                | 21                    | 1526        | 22            | 1420        | 0.816        | 13               | 792        | 8         | 734        | 0.489        |
| 0005975 | carbohydrate metabolism                                        | 54                    | 1493        | 53            | 1389        | 0.862        | 26               | 779        | 28        | 714        | 0.657        |
| 0006519 | amino acid and derivative metabolism                           | 32                    | 1515        | 38            | 1404        | 0.367        | 17               | 788        | 15        | 727        | 0.957        |
| 0006629 | lipid metabolism                                               | 41                    | 1506        | 48            | 1394        | 0.326        | 20               | 785        | 21        | 721        | 0.791        |
| 0009308 | amine metabolism                                               | 35                    | 1512        | 46            | 1396        | 0.148        | 19               | 786        | 16        | 726        | 0.922        |
| 0042440 | pigment metabolism                                             | 5                     | 1542        | 7             | 1435        | 0.681        | 3                | 802        | 2         | 740        | 0.927        |
| 0042445 | hormone metabolism                                             | 5                     | 1542        | 2             | 1440        | 0.507        | 2                | 803        | 3         | 739        | 0.927        |
| 0009058 | biosynthesis                                                   | 98                    | 1449        | 106           | 1336        | 0.304        | 45               | 760        | 53        | 689        | 0.251        |
| 0019748 | secondary metabolism                                           | 7                     | 1540        | 7             | 1435        | 0.892        | 4                | 801        | 3         | 739        | 0.914        |
| 0019222 | regulation of metabolism                                       | 129                   | 1418        | 109           | 1333        | 0.472        | 73               | 732        | 56        | 686        | 0.323        |
| 0016265 | death                                                          | 53                    | 1494        | 33            | 1409        | 0.08         | 30               | 775        | 23        | 719        | 0.591        |
| 0008219 | cell death                                                     | 47                    | 1500        | 27            | 1415        | 0.053        | 26               | 779        | 21        | 721        | 0.757        |
| 0016271 | tissue death                                                   | <b>21</b>             | <b>1526</b> | <b>6</b>      | <b>1436</b> | <b>0.012</b> | 11               | 794        | 10        | 732        | 0.851        |
| 0042592 | homeostasis                                                    | 13                    | 1534        | 16            | 1426        | 0.573        | 7                | 798        | 6         | 736        | 0.883        |
| 0019725 | cell homeostasis                                               | 12                    | 1535        | 14            | 1428        | 0.706        | 6                | 799        | 6         | 736        | 0.882        |
| 0050801 | ion homeostasis                                                | 4                     | 1543        | 10            | 1432        | 0.141        | 3                | 802        | 1         | 741        | 0.675        |
| 0043062 | extracellular structure organization and biogenesis            | 9                     | 1538        | 10            | 1432        | 0.878        | 5                | 800        | 4         | 738        | 0.902        |
| 0046903 | secretion                                                      | 55                    | 1492        | 46            | 1396        | 0.652        | 29               | 776        | 26        | 716        | 0.974        |
| 0048511 | rhythmic process                                               | 12                    | 1535        | 5             | 1437        | 0.189        | 6                | 799        | 6         | 736        | 0.882        |

## Hive bee-to-forager (d8, d12, d17) → d17F)

| GO#     | GO term                                                       | Representational bias |             |               |             |              | Directional bias |            |            |            |              |
|---------|---------------------------------------------------------------|-----------------------|-------------|---------------|-------------|--------------|------------------|------------|------------|------------|--------------|
|         |                                                               | regulated             |             | not regulated |             | p            | up-reg.          |            | down-reg.  |            | p            |
|         |                                                               | term                  | n.term      | term          | n.term      |              | term             | n.term     | term       | n.term     |              |
| 0050791 | regulation of physiological process                           | 191                   | 1356        | 156           | 1286        | 0.213        | 103              | 702        | 88         | 654        | 0.63         |
| 0050874 | organismal physiological process                              | 134                   | 1413        | 98            | 1344        | 0.066        | 67               | 738        | 67         | 675        | 0.687        |
| 0050875 | cellular physiological process                                | 788                   | 759         | 731           | 711         | 0.923        | 400              | 405        | 388        | 354        | 0.331        |
| 0006810 | transport                                                     | 193                   | 1354        | 205           | 1237        | 0.178        | 92               | 713        | 101        | 641        | 0.222        |
| 0006811 | ion transport                                                 | 58                    | 1489        | 62            | 1380        | 0.501        | 24               | 781        | 34         | 708        | 0.128        |
| 0006818 | hydrogen transport                                            | 13                    | 1534        | 5             | 1437        | 0.132        | 4                | 801        | 9          | 733        | 0.207        |
| 0006836 | neurotransmitter transport                                    | 3                     | 1544        | 2             | 1440        | 0.937        | 1                | 804        | 2          | 740        | 0.944        |
| 0006858 | extracellular transport                                       | 7                     | 1540        | 8             | 1434        | 0.891        | 2                | 803        | 5          | 737        | 0.386        |
| 0006869 | lipid transport                                               | 7                     | 1540        | 9             | 1433        | 0.695        | 2                | 803        | 5          | 737        | 0.386        |
| 0008643 | carbohydrate transport                                        | 6                     | 1541        | 9             | 1433        | 0.513        | 3                | 802        | 3          | 739        | 0.757        |
| 0015031 | protein transport                                             | 82                    | 1465        | 98            | 1344        | 0.101        | 39               | 766        | 43         | 699        | 0.472        |
| 0015837 | amine transport                                               | 6                     | 1541        | 6             | 1436        | 0.867        | 2                | 803        | 4          | 738        | 0.61         |
| 0015931 | nucleobase, nucleoside, nucleotide and nucleic acid transport | 8                     | 1539        | 5             | 1437        | 0.668        | 5                | 800        | 3          | 739        | 0.811        |
| 0016192 | vesicle-mediated transport                                    | 60                    | 1487        | 59            | 1383        | 0.838        | 32               | 773        | 28         | 714        | 0.942        |
| 0045045 | secretory pathway                                             | 50                    | 1497        | 45            | 1397        | 0.945        | 26               | 779        | 24         | 718        | 0.89         |
| 0046907 | intracellular transport                                       | 94                    | 1453        | 104           | 1338        | 0.24         | 43               | 762        | 51         | 691        | 0.249        |
| 0051049 | regulation of transport                                       | 6                     | 1541        | 12            | 1430        | 0.183        | 2                | 803        | 4          | 738        | 0.61         |
| 0008283 | cell proliferation                                            | <b>48</b>             | <b>1499</b> | <b>23</b>     | <b>1419</b> | <b>0.01</b>  | 27               | 778        | 21         | 721        | 0.655        |
| 0007049 | cell cycle                                                    | 75                    | 1472        | 53            | 1389        | 0.136        | 33               | 772        | 42         | 700        | 0.19         |
| 0017145 | stem cell division                                            | 7                     | 1540        | 5             | 1437        | 0.867        | 4                | 801        | 3          | 739        | 0.914        |
| 0016043 | cell organization and biogenesis                              | 152                   | 1395        | 123           | 1319        | 0.246        | 75               | 730        | 77         | 665        | 0.539        |
| 0000902 | cellular morphogenesis                                        | 43                    | 1504        | 37            | 1405        | 0.804        | 25               | 780        | 18         | 724        | 0.511        |
| 0006996 | organelle organization and biogenesis                         | 131                   | 1416        | 107           | 1335        | 0.322        | 61               | 744        | 70         | 672        | 0.223        |
| 0007010 | cytoskeleton organization and biogenesis                      | 98                    | 1449        | 72            | 1370        | 0.133        | 44               | 761        | 54         | 688        | 0.175        |
| 0006997 | nuclear organization and biogenesis                           | 5                     | 1542        | 5             | 1437        | 0.837        | 5                | 800        | 0          | 742        | 0.089        |
| 0007028 | cytoplasm organization and biogenesis                         | 10                    | 1537        | 9             | 1433        | 0.878        | 8                | 797        | 2          | 740        | 0.145        |
| 0016044 | membrane organization and biogenesis                          | 8                     | 1539        | 1             | 1441        | 0.058        | 5                | 800        | 3          | 739        | 0.811        |
| 0051128 | regulation of cell organization and biogenesis                | 5                     | 1542        | 6             | 1436        | 0.907        | 1                | 804        | 4          | 738        | 0.323        |
| 0016049 | cell growth                                                   | 5                     | 1542        | 4             | 1438        | 0.916        | 2                | 803        | 3          | 739        | 0.927        |
| 0050896 | response to stimulus                                          | 98                    | 1449        | 83            | 1359        | 0.558        | 52               | 753        | 46         | 696        | 0.916        |
| 0006950 | response to stress                                            | 37                    | 1510        | 22            | 1420        | 0.117        | 24               | 781        | 13         | 729        | 0.157        |
| 0009408 | response to heat                                              | 7                     | 1540        | 3             | 1439        | 0.401        | 5                | 800        | 2          | 740        | 0.516        |
| 0006979 | response to oxidative stress                                  | 1                     | 1546        | 1             | 1441        | 0.511        | 1                | 804        | 0          | 742        | 0.967        |
| 0051179 | localization                                                  | 214                   | 1333        | 215           | 1227        | 0.431        | 101              | 704        | 113        | 629        | 0.146        |
| 0006403 | RNA localization                                              | 16                    | 1531        | 16            | 1426        | 0.982        | 7                | 798        | 9          | 733        | 0.678        |
| 0008104 | protein localization                                          | 92                    | 1455        | 103           | 1339        | 0.212        | 44               | 761        | 48         | 694        | 0.468        |
| 0051234 | establishment of localization                                 | 198                   | 1349        | 205           | 1237        | 0.28         | 95               | 710        | 103        | 639        | 0.251        |
| 0051235 | maintenance of localization                                   | 1                     | 1546        | 3             | 1439        | 0.568        | 1                | 804        | 0          | 742        | 0.967        |
| 0050789 | regulation of biological process                              | 224                   | 1323        | 179           | 1263        | 0.11         | 122              | 683        | 102        | 640        | 0.475        |
| 0050790 | regulation of enzyme activity                                 | 7                     | 1540        | 7             | 1435        | 0.892        | 4                | 801        | 3          | 739        | 0.914        |
| 0040029 | regulation of gene expression, epigenetic                     | <b>17</b>             | <b>1530</b> | <b>3</b>      | <b>1439</b> | <b>0.006</b> | 6                | 799        | 11         | 731        | 0.252        |
| 0006306 | DNA methylation                                               | <b>7</b>              | <b>1540</b> | <b>0</b>      | <b>1442</b> | <b>0.029</b> | 3                | 802        | 4          | 738        | 0.914        |
| 0045814 | negative regulation of gene expression, epigenetic            | 5                     | 1542        | 2             | 1440        | 0.507        | 1                | 804        | 4          | 738        | 0.323        |
| 0006342 | chromatin silencing                                           | 5                     | 1542        | 2             | 1440        | 0.507        | 1                | 804        | 4          | 738        | 0.323        |
| 0003674 | molecular_function                                            | 911                   | 636         | 821           | 621         | 0.297        | 459              | 346        | 452        | 290        | 0.132        |
| 0016209 | antioxidant activity                                          | 5                     | 1542        | 4             | 1438        | 0.916        | 0                | 805        | 5          | 737        | 0.059        |
| 0005488 | binding                                                       | 529                   | 1018        | 478           | 964         | 0.571        | 280              | 525        | 249        | 493        | 0.65         |
| 0005509 | calcium ion binding                                           | 34                    | 1513        | 27            | 1415        | 0.618        | 19               | 786        | 15         | 727        | 0.779        |
| 0030246 | carbohydrate binding                                          | 8                     | 1539        | 7             | 1435        | 0.891        | 5                | 800        | 3          | 739        | 0.811        |
| 0008289 | lipid binding                                                 | 15                    | 1532        | 11            | 1431        | 0.681        | 5                | 800        | 10         | 732        | 0.231        |
| 0003676 | nucleic acid binding                                          | 197                   | 1350        | 192           | 1250        | 0.677        | 97               | 708        | 100        | 642        | 0.444        |
| 0003677 | DNA binding                                                   | 104                   | 1443        | 90            | 1352        | 0.646        | 56               | 749        | 48         | 694        | 0.779        |
| 0003682 | chromatin binding                                             | 11                    | 1536        | 12            | 1430        | 0.866        | 6                | 799        | 5          | 737        | 0.892        |
| 0003700 | transcription factor activity                                 | 41                    | 1506        | 45            | 1397        | 0.51         | 26               | 779        | 15         | 727        | 0.187        |
| 0003723 | RNA binding                                                   | 54                    | 1493        | 65            | 1377        | 0.184        | 22               | 783        | 32         | 710        | 0.121        |
| 0008135 | translation factor activity, nucleic acid binding             | 14                    | 1533        | 21            | 1421        | 0.219        | 7                | 798        | 7          | 735        | 0.908        |
| 0000166 | nucleotide binding                                            | 139                   | 1408        | 116           | 1326        | 0.393        | 72               | 733        | 67         | 675        | 0.976        |
| 0005515 | protein binding                                               | <b>220</b>            | <b>1327</b> | <b>159</b>    | <b>1283</b> | <b>0.01</b>  | 120              | 685        | 100        | 642        | 0.464        |
| 0008134 | transcription factor binding                                  | 21                    | 1526        | 10            | 1432        | 0.107        | 10               | 795        | 11         | 731        | 0.851        |
| 0008092 | cytoskeletal protein binding                                  | 55                    | 1492        | 33            | 1409        | 0.053        | 27               | 778        | 28         | 714        | 0.758        |
| 0003779 | actin binding                                                 | 31                    | 1516        | 22            | 1420        | 0.395        | 15               | 790        | 16         | 726        | 0.819        |
| 0003824 | catalytic activity                                            | 440                   | 1107        | 399           | 1043        | 0.668        | <b>207</b>       | <b>598</b> | <b>233</b> | <b>509</b> | <b>0.015</b> |
| 0016787 | hydrolase activity                                            | 189                   | 1358        | 183           | 1259        | 0.737        | 96               | 709        | 93         | 649        | 0.774        |
| 0003924 | GTPase activity                                               | 19                    | 1528        | 21            | 1421        | 0.702        | 6                | 799        | 13         | 729        | 0.118        |
| 0004518 | nuclease activity                                             | 7                     | 1540        | 8             | 1434        | 0.891        | 5                | 800        | 2          | 740        | 0.516        |



## Hive bee-to-forager (d8, d12, d17) → d17F)

| GO#     | GO term                                    | Representational bias |             |               |             |              | Directional bias |            |            |            |              |
|---------|--------------------------------------------|-----------------------|-------------|---------------|-------------|--------------|------------------|------------|------------|------------|--------------|
|         |                                            | regulated             |             | not regulated |             | p            | up-reg.          |            | down-reg.  |            | p            |
|         |                                            | term                  | n.term      | term          | n.term      |              | term             | n.term     | term       | n.term     |              |
| 0008233 | peptidase activity                         | 67                    | 1480        | 51            | 1391        | 0.308        | 32               | 773        | 35         | 707        | 0.554        |
| 0004721 | phosphoprotein phosphatase activity        | 10                    | 1537        | 20            | 1422        | 0.065        | 6                | 799        | 4          | 738        | 0.851        |
| 0016740 | transferase activity                       | 137                   | 1410        | 104           | 1338        | 0.114        | 67               | 738        | 70         | 672        | 0.497        |
| 0016301 | kinase activity                            | 79                    | 1468        | 56            | 1386        | 0.128        | 43               | 762        | 36         | 706        | 0.748        |
| 0004672 | protein kinase activity                    | <b>60</b>             | <b>1487</b> | <b>35</b>     | <b>1407</b> | <b>0.031</b> | 31               | 774        | 29         | 713        | 0.942        |
| 0030234 | enzyme regulator activity                  | 60                    | 1487        | 45            | 1397        | 0.305        | 32               | 773        | 28         | 714        | 0.942        |
| 0003774 | motor activity                             | 16                    | 1531        | 12            | 1430        | 0.702        | 9                | 796        | 7          | 735        | 0.93         |
| 0004871 | signal transducer activity                 | <b>151</b>            | <b>1396</b> | <b>105</b>    | <b>1337</b> | <b>0.019</b> | 85               | 720        | 66         | 676        | 0.31         |
| 0004872 | receptor activity                          | 60                    | 1487        | 49            | 1393        | 0.547        | 26               | 779        | 34         | 708        | 0.213        |
| 0004879 | ligand-dependent nuclear receptor activity | 5                     | 1542        | 4             | 1438        | 0.916        | 3                | 802        | 2          | 740        | 0.927        |
| 0004888 | transmembrane receptor activity            | 40                    | 1507        | 34            | 1408        | 0.777        | 17               | 788        | 23         | 719        | 0.288        |
| 0004930 | G-protein coupled receptor activity        | 18                    | 1529        | 12            | 1430        | 0.469        | 8                | 797        | 10         | 732        | 0.681        |
| 0005057 | receptor signaling protein activity        | <b>54</b>             | <b>1493</b> | <b>26</b>     | <b>1416</b> | <b>0.006</b> | 31               | 774        | 23         | 719        | 0.506        |
| 0005102 | receptor binding                           | 43                    | 1504        | 26            | 1416        | 0.098        | 28               | 777        | 15         | 727        | 0.113        |
| 0005198 | structural molecule activity               | <b>97</b>             | <b>1450</b> | <b>65</b>     | <b>1377</b> | <b>0.041</b> | 44               | 761        | 53         | 689        | 0.21         |
| 0030528 | transcription regulator activity           | 114                   | 1433        | 85            | 1357        | 0.123        | 67               | 738        | 47         | 695        | 0.162        |
| 0045182 | translation regulator activity             | 14                    | 1533        | 21            | 1421        | 0.219        | 7                | 798        | 7          | 735        | 0.908        |
| 0005215 | transporter activity                       | 119                   | 1428        | 134           | 1308        | 0.132        | <b>45</b>        | <b>760</b> | <b>74</b>  | <b>668</b> | <b>0.002</b> |
| 0005489 | electron transporter activity              | 14                    | 1533        | 15            | 1427        | 0.849        | <b>3</b>         | <b>802</b> | <b>11</b>  | <b>731</b> | <b>0.042</b> |
| 0005216 | ion channel activity                       | 23                    | 1524        | 29            | 1413        | 0.339        | 8                | 797        | 15         | 727        | 0.145        |
| 0005244 | voltage-gated ion channel activity         | 14                    | 1533        | 12            | 1430        | 0.986        | 6                | 799        | 8          | 734        | 0.673        |
| 0005575 | cellular_component                         | 630                   | 917         | 593           | 849         | 0.853        | <b>292</b>       | <b>513</b> | <b>338</b> | <b>404</b> | <b>3E-04</b> |
| 0005623 | cell                                       | 571                   | 976         | 541           | 901         | 0.76         | <b>265</b>       | <b>540</b> | <b>306</b> | <b>436</b> | <b>9E-04</b> |
| 0005622 | intracellular                              | 454                   | 1093        | 403           | 1039        | 0.421        | <b>207</b>       | <b>598</b> | <b>247</b> | <b>495</b> | <b>0.001</b> |
| 0005737 | cytoplasm                                  | 242                   | 1305        | 216           | 1226        | 0.651        | <b>88</b>        | <b>717</b> | <b>154</b> | <b>588</b> | <b>2E-07</b> |
| 0016023 | cytoplasmic vesicle                        | 23                    | 1524        | 18            | 1424        | 0.687        | 12               | 793        | 11         | 731        | 0.844        |
| 0005829 | cytosol                                    | 43                    | 1504        | 36            | 1406        | 0.713        | 17               | 788        | 26         | 716        | 0.131        |
| 0005783 | endoplasmic reticulum                      | 26                    | 1521        | 31            | 1411        | 0.422        | 10               | 795        | 16         | 726        | 0.23         |
| 0005794 | Golgi apparatus                            | 15                    | 1532        | 10            | 1432        | 0.53         | 8                | 797        | 7          | 735        | 0.874        |
| 0005815 | microtubule organizing center              | 4                     | 1543        | 5             | 1437        | 0.916        | 2                | 803        | 2          | 740        | 0.675        |
| 0005739 | mitochondrion                              | <b>66</b>             | <b>1481</b> | <b>39</b>     | <b>1403</b> | <b>0.027</b> | <b>13</b>        | <b>792</b> | <b>53</b>  | <b>689</b> | <b>2E-07</b> |
| 0005840 | ribosome                                   | 15                    | 1532        | 9             | 1433        | 0.394        | 4                | 801        | 11         | 731        | 0.086        |
| 0005773 | vacuole                                    | 8                     | 1539        | 6             | 1436        | 0.892        | 2                | 803        | 6          | 736        | 0.238        |
| 0005764 | lysosome                                   | 3                     | 1544        | 2             | 1440        | 0.937        | 1                | 804        | 2          | 740        | 0.944        |
| 0005856 | cytoskeleton                               | 48                    | 1499        | 37            | 1405        | 0.44         | 23               | 782        | 25         | 717        | 0.665        |
| 0005694 | chromosome                                 | 24                    | 1523        | 16            | 1426        | 0.373        | 9                | 796        | 15         | 727        | 0.218        |
| 0000228 | nuclear chromosome                         | 4                     | 1543        | 1             | 1441        | 0.414        | 1                | 804        | 3          | 739        | 0.56         |
| 0005634 | nucleus                                    | 192                   | 1355        | 180           | 1262        | 0.997        | 103              | 702        | 89         | 653        | 0.689        |
| 0005635 | nuclear membrane                           | 7                     | 1540        | 10            | 1432        | 0.527        | 6                | 799        | 1          | 741        | 0.159        |
| 0005730 | nucleolus                                  | 6                     | 1541        | 5             | 1437        | 0.907        | 2                | 803        | 4          | 738        | 0.61         |
| 0005654 | nucleoplasm                                | 38                    | 1509        | 34            | 1408        | 0.955        | 20               | 785        | 18         | 724        | 0.928        |
| 0005777 | peroxisome                                 | 5                     | 1542        | 4             | 1438        | 0.916        | 2                | 803        | 3          | 739        | 0.927        |
| 0005886 | plasma membrane                            | 75                    | 1472        | 81            | 1361        | 0.388        | <b>28</b>        | <b>777</b> | <b>47</b>  | <b>695</b> | <b>0.013</b> |
| 0005576 | extracellular region                       | 35                    | 1512        | 41            | 1401        | 0.373        | 16               | 789        | 19         | 723        | 0.558        |
| 0005578 | extracellular matrix (sensu Metazoa)       | 14                    | 1533        | 21            | 1421        | 0.219        | 5                | 800        | 9          | 733        | 0.337        |

Hive bee-to-forager, experience independent ([d8, d12, d17] → d17F; forager not different than hive-restricted, p>0.2)

| GO#     | GO term                                                                           | Representational bias |             |               |             |             | Directional bias |            |           |            |              |
|---------|-----------------------------------------------------------------------------------|-----------------------|-------------|---------------|-------------|-------------|------------------|------------|-----------|------------|--------------|
|         |                                                                                   | regulated             |             | not regulated |             | p           | up-reg.          |            | down-reg. |            | p            |
|         |                                                                                   | term                  | n.term      | term          | n.term      |             | term             | n.term     | term      | n.term     |              |
| 0008150 | biological_process                                                                | 818                   | 544         | 872           | 642         | 0.193       | 399              | 284        | 419       | 260        | 0.236        |
| 0007610 | behavior                                                                          | 79                    | 1283        | 76            | 1438        | 0.399       | 39               | 644        | 40        | 639        | 0.979        |
| 0030534 | adult behavior                                                                    | 11                    | 1351        | 12            | 1502        | 0.869       | 4                | 679        | 7         | 672        | 0.538        |
| 0030537 | larval behavior                                                                   | 6                     | 1356        | 3             | 1511        | 0.408       | 3                | 680        | 3         | 676        | 0.688        |
| 0007611 | learning and/or memory                                                            | 12                    | 1350        | 11            | 1503        | 0.799       | 5                | 678        | 7         | 672        | 0.764        |
| 0007612 | learning                                                                          | 8                     | 1354        | 7             | 1507        | 0.837       | 4                | 679        | 4         | 675        | 0.729        |
| 0007613 | memory                                                                            | 5                     | 1357        | 5             | 1509        | 0.881       | 3                | 680        | 2         | 677        | 0.995        |
| 0007626 | locomotory behavior                                                               | 60                    | 1302        | 58            | 1456        | 0.496       | 30               | 653        | 30        | 649        | 0.913        |
| 0007635 | chemosensory behavior                                                             | 9                     | 1353        | 9             | 1505        | 0.991       | 5                | 678        | 4         | 675        | 0.993        |
| 0007622 | rhythmic behavior                                                                 | 6                     | 1356        | 9             | 1505        | 0.754       | 5                | 678        | 1         | 678        | 0.222        |
| 0048512 | circadian behavior                                                                | 6                     | 1356        | 8             | 1506        | 0.944       | 5                | 678        | 1         | 678        | 0.222        |
| 0009987 | cellular process                                                                  | 762                   | 600         | 807           | 707         | 0.166       | 371              | 312        | 391       | 288        | 0.246        |
| 0007154 | cell communication                                                                | 240                   | 1122        | 226           | 1288        | 0.057       | 125              | 558        | 115       | 564        | 0.555        |
| 0007155 | cell adhesion                                                                     | 46                    | 1316        | 37            | 1477        | 0.167       | 21               | 662        | 25        | 654        | 0.638        |
| 0008037 | cell recognition                                                                  | 1                     | 1361        | 1             | 1513        | 0.526       | 0                | 683        | 1         | 678        | 0.998        |
| 0008038 | neuronal cell recognition                                                         | 1                     | 1361        | 1             | 1513        | 0.526       | 0                | 683        | 1         | 678        | 0.998        |
| 0016337 | cell-cell adhesion                                                                | 20                    | 1342        | 15            | 1499        | 0.319       | 9                | 674        | 11        | 668        | 0.811        |
| 0016339 | calcium-dependent cell-cell adhesion                                              | 3                     | 1359        | 3             | 1511        | 0.78        | 2                | 681        | 1         | 678        | 0.996        |
| 0007156 | homophilic cell adhesion                                                          | 3                     | 1359        | 5             | 1509        | 0.838       | 2                | 681        | 1         | 678        | 0.996        |
| 0007160 | cell-matrix adhesion                                                              | 4                     | 1358        | 5             | 1509        | 0.874       | 1                | 682        | 3         | 676        | 0.612        |
| 0007267 | cell-cell signaling                                                               | 82                    | 1280        | 67            | 1447        | 0.065       | 40               | 643        | 42        | 637        | 0.888        |
| 0019226 | transmission of nerve impulse                                                     | 73                    | 1289        | 59            | 1455        | 0.075       | 35               | 648        | 38        | 641        | 0.79         |
| 0007268 | synaptic transmission                                                             | 52                    | 1310        | 47            | 1467        | 0.344       | 27               | 656        | 25        | 654        | 0.905        |
| 0007270 | nerve-nerve synaptic transmission                                                 | 5                     | 1357        | 10            | 1504        | 0.406       | 2                | 681        | 3         | 676        | 0.995        |
| 0001505 | regulation of neurotransmitter levels                                             | 32                    | 1330        | 27            | 1487        | 0.348       | 18               | 665        | 14        | 665        | 0.603        |
| 0042133 | neurotransmitter metabolism                                                       | 4                     | 1358        | 4             | 1510        | 0.838       | 3                | 680        | 1         | 678        | 0.621        |
| 0007269 | neurotransmitter secretion                                                        | 28                    | 1334        | 24            | 1490        | 0.42        | 15               | 668        | 13        | 666        | 0.861        |
| 0007165 | signal transduction                                                               | 187                   | 1175        | 174           | 1340        | 0.08        | 102              | 581        | 85        | 594        | 0.224        |
| 0007166 | cell surface receptor linked signal transduction                                  | 77                    | 1285        | 72            | 1442        | 0.317       | 43               | 640        | 34        | 645        | 0.362        |
| 0007167 | enzyme linked receptor protein signaling pathway                                  | 21                    | 1341        | 21            | 1493        | 0.849       | 11               | 672        | 10        | 669        | 0.989        |
| 0007178 | transmembrane receptor protein serine/threonine kinase signaling pathway          | 8                     | 1354        | 6             | 1508        | 0.641       | 3                | 680        | 5         | 674        | 0.717        |
| 0007179 | transforming growth factor beta receptor signaling pathway                        | 3                     | 1359        | 4             | 1510        | 0.889       | 2                | 681        | 1         | 678        | 0.996        |
| 0007169 | transmembrane receptor protein tyrosine kinase signaling pathway                  | 14                    | 1348        | 16            | 1498        | 0.914       | 8                | 675        | 6         | 673        | 0.797        |
| 0007173 | epidermal growth factor receptor signaling pathway                                | 4                     | 1358        | 3             | 1511        | 0.889       | 3                | 680        | 1         | 678        | 0.621        |
| 0008286 | insulin receptor signaling pathway                                                | 1                     | 1361        | 2             | 1512        | 0.927       | 0                | 683        | 1         | 678        | 0.998        |
| 0008293 | torso signaling pathway                                                           | 3                     | 1359        | 4             | 1510        | 0.889       | 3                | 680        | 0         | 679        | 0.25         |
| 0007186 | G-protein coupled receptor protein signaling pathway                              | 37                    | 1325        | 31            | 1483        | 0.291       | 18               | 665        | 19        | 660        | 0.986        |
| 0007200 | G-protein signaling, coupled to IP3 second messenger (phospholipase C activating) | 3                     | 1359        | 2             | 1512        | 0.906       | 1                | 682        | 2         | 677        | 0.996        |
| 0007219 | Notch signaling pathway                                                           | 8                     | 1354        | 5             | 1509        | 0.454       | 5                | 678        | 3         | 676        | 0.729        |
| 0007224 | smoothed signaling pathway                                                        | 3                     | 1359        | 3             | 1511        | 0.78        | 2                | 681        | 1         | 678        | 0.996        |
| 0008063 | Toll signaling pathway                                                            | 2                     | 1360        | 2             | 1512        | 0.693       | 2                | 681        | 0         | 679        | 0.482        |
| 0016055 | Wnt receptor signaling pathway                                                    | 5                     | 1357        | 10            | 1504        | 0.406       | 4                | 679        | 1         | 678        | 0.374        |
| 0007242 | intracellular signaling cascade                                                   | <b>96</b>             | <b>1266</b> | <b>78</b>     | <b>1436</b> | <b>0.04</b> | 51               | 632        | 45        | 634        | 0.617        |
| 0007263 | nitric oxide mediated signal transduction                                         | 1                     | 1361        | 3             | 1511        | 0.693       | 1                | 682        | 0         | 679        | 0.998        |
| 0007243 | protein kinase cascade                                                            | 20                    | 1342        | 20            | 1494        | 0.859       | 11               | 672        | 9         | 670        | 0.832        |
| 0007259 | JAK-STAT cascade                                                                  | 3                     | 1359        | 3             | 1511        | 0.78        | 2                | 681        | 1         | 678        | 0.996        |
| 0000165 | MAPKKK cascade                                                                    | 16                    | 1346        | 16            | 1498        | 0.902       | 9                | 674        | 7         | 672        | 0.811        |
| 0019932 | second-messenger-mediated signaling                                               | 12                    | 1350        | 9             | 1505        | 0.495       | 5                | 678        | 7         | 672        | 0.764        |
| 0019722 | calcium-mediated signaling                                                        | 7                     | 1355        | 7             | 1507        | 0.944       | 2                | 681        | 5         | 674        | 0.444        |
| 0048015 | phosphoinositide-mediated signaling                                               | 3                     | 1359        | 2             | 1512        | 0.906       | 1                | 682        | 2         | 677        | 0.996        |
| 0007264 | small GTPase mediated signal transduction                                         | 17                    | 1345        | 25            | 1489        | 0.457       | 7                | 676        | 10        | 669        | 0.617        |
| 0007265 | Ras protein signal transduction                                                   | 5                     | 1357        | 5             | 1509        | 0.881       | 0                | 683        | 5         | 674        | 0.072        |
| 0009966 | regulation of signal transduction                                                 | 17                    | 1345        | 17            | 1497        | 0.89        | 12               | 671        | 5         | 674        | 0.146        |
| 0007275 | development                                                                       | 220                   | 1142        | 223           | 1291        | 0.315       | 110              | 573        | 110       | 569        | 0.979        |
| 0007568 | aging                                                                             | 5                     | 1357        | 4             | 1510        | 0.874       | 3                | 680        | 2         | 677        | 0.995        |
| 0030154 | cell differentiation                                                              | 55                    | 1307        | 60            | 1454        | 0.994       | 29               | 654        | 26        | 653        | 0.8          |
| 0048468 | cell development                                                                  | 37                    | 1325        | 35            | 1479        | 0.566       | 20               | 663        | 17        | 662        | 0.753        |
| 0000904 | cellular morphogenesis during differentiation                                     | 10                    | 1352        | 9             | 1505        | 0.817       | <b>9</b>         | <b>674</b> | <b>1</b>  | <b>678</b> | <b>0.027</b> |
| 0042461 | photoreceptor cell development                                                    | 9                     | 1353        | 9             | 1505        | 0.991       | <b>8</b>         | <b>675</b> | <b>1</b>  | <b>678</b> | <b>0.046</b> |
| 0042051 | eye photoreceptor development (sensu Endopterygota)                               | 8                     | 1354        | 9             | 1505        | 0.827       | 7                | 676        | 1         | 678        | 0.078        |
| 0045165 | cell fate commitment                                                              | 21                    | 1341        | 26            | 1488        | 0.823       | 13               | 670        | 8         | 671        | 0.386        |

| GO#     | GO term                                                        | Representational bias |             |               |             |              | Directional bias |            |            |            |              |
|---------|----------------------------------------------------------------|-----------------------|-------------|---------------|-------------|--------------|------------------|------------|------------|------------|--------------|
|         |                                                                | regulated             |             | not regulated |             | p            | up-reg.          |            | down-reg.  |            | p            |
|         |                                                                | term                  | n.term      | term          | n.term      |              | term             | n.term     | term       | n.term     |              |
| 0001709 | cell fate determination                                        | 10                    | 1352        | 18            | 1496        | 0.294        | 6                | 677        | 4          | 675        | 0.758        |
| 0007400 | neuroblast cell fate determination                             | 4                     | 1358        | 4             | 1510        | 0.838        | 2                | 681        | 2          | 677        | 0.621        |
| 0001708 | cell fate specification                                        | 2                     | 1360        | 6             | 1508        | 0.361        | 2                | 681        | 0          | 679        | 0.482        |
| 0007349 | cellularization                                                | 5                     | 1357        | 6             | 1508        | 0.86         | 2                | 681        | 3          | 676        | 0.995        |
| 0040007 | growth                                                         | 18                    | 1344        | 16            | 1498        | 0.629        | 10               | 673        | 8          | 671        | 0.822        |
| 0002164 | larval development                                             | 9                     | 1353        | 8             | 1506        | 0.827        | 6                | 677        | 3          | 676        | 0.509        |
| 0002165 | larval or pupal development (sensu Insecta)                    | <b>72</b>             | <b>1290</b> | <b>51</b>     | <b>1463</b> | <b>0.014</b> | 39               | 644        | 33         | 646        | 0.562        |
| 0007552 | metamorphosis                                                  | <b>67</b>             | <b>1295</b> | <b>48</b>     | <b>1466</b> | <b>0.022</b> | 37               | 646        | 30         | 649        | 0.467        |
| 0009653 | morphogenesis                                                  | 147                   | 1215        | 158           | 1356        | 0.803        | 80               | 603        | 67         | 612        | 0.312        |
| 0002009 | morphogenesis of an epithelium                                 | 22                    | 1340        | 21            | 1493        | 0.727        | 12               | 671        | 10         | 669        | 0.841        |
| 0009887 | organogenesis                                                  | 130                   | 1232        | 139           | 1375        | 0.787        | 70               | 613        | 60         | 619        | 0.427        |
| 0001654 | eye morphogenesis                                              | 29                    | 1333        | 28            | 1486        | 0.687        | <b>21</b>        | <b>662</b> | <b>8</b>   | <b>671</b> | <b>0.025</b> |
| 0008406 | gonad development                                              | 3                     | 1359        | 5             | 1509        | 0.838        | 1                | 682        | 2          | 677        | 0.996        |
| 0007444 | imaginal disc development                                      | 45                    | 1317        | 44            | 1470        | 0.612        | 28               | 655        | 17         | 662        | 0.135        |
| 0007494 | midgut development                                             | 1                     | 1361        | 3             | 1511        | 0.693        | 0                | 683        | 1          | 678        | 0.998        |
| 0007517 | muscle development                                             | 10                    | 1352        | 21            | 1493        | 0.131        | 4                | 679        | 6          | 673        | 0.744        |
| 0007399 | neurogenesis                                                   | 73                    | 1289        | 82            | 1432        | 0.987        | 41               | 642        | 32         | 647        | 0.349        |
| 0007409 | axonogenesis                                                   | 20                    | 1342        | 23            | 1491        | 0.967        | 10               | 673        | 10         | 669        | 0.832        |
| 0007411 | axon guidance                                                  | 15                    | 1347        | 18            | 1496        | 0.964        | 9                | 674        | 6          | 673        | 0.612        |
| 0007417 | central nervous system development                             | 16                    | 1346        | 19            | 1495        | 0.98         | 9                | 674        | 7          | 672        | 0.811        |
| 0016358 | dendrite morphogenesis                                         | 4                     | 1358        | 9             | 1505        | 0.356        | 1                | 682        | 3          | 676        | 0.612        |
| 0042063 | gliogenesis                                                    | 4                     | 1358        | 7             | 1507        | 0.668        | 1                | 682        | 3          | 676        | 0.612        |
| 0007422 | peripheral nervous system development                          | 14                    | 1348        | 25            | 1489        | 0.2          | 10               | 673        | 4          | 675        | 0.183        |
| 0050767 | regulation of neurogenesis                                     | 1                     | 1361        | 4             | 1510        | 0.437        | 0                | 683        | 1          | 678        | 0.998        |
| 0007424 | tracheal system development (sensu Insecta)                    | 15                    | 1347        | 20            | 1494        | 0.714        | 9                | 674        | 6          | 673        | 0.612        |
| 0048513 | organ development                                              | 133                   | 1229        | 140           | 1374        | 0.682        | 72               | 611        | 61         | 618        | 0.38         |
| 0007389 | pattern specification                                          | 30                    | 1332        | 43            | 1471        | 0.334        | 16               | 667        | 14         | 665        | 0.866        |
| 0048066 | pigmentation                                                   | 5                     | 1357        | 5             | 1509        | 0.881        | 5                | 678        | 0          | 679        | 0.074        |
| 0009791 | post-embryonic development                                     | 9                     | 1353        | 8             | 1506        | 0.827        | 6                | 677        | 3          | 676        | 0.509        |
| 0009790 | embryonic development                                          | 46                    | 1316        | 51            | 1463        | 0.928        | 29               | 654        | 17         | 662        | 0.103        |
| 0007530 | sex determination                                              | 5                     | 1357        | 4             | 1510        | 0.874        | 2                | 681        | 3          | 676        | 0.995        |
| 0007548 | sex differentiation                                            | 6                     | 1356        | 10            | 1504        | 0.589        | 3                | 680        | 3          | 676        | 0.688        |
| 0019827 | stem cell maintenance                                          | 4                     | 1358        | 3             | 1511        | 0.889        | 2                | 681        | 2          | 677        | 0.621        |
| 0000003 | reproduction                                                   | 70                    | 1292        | 67            | 1447        | 0.418        | 36               | 647        | 34         | 645        | 0.922        |
| 0050793 | regulation of development                                      | 17                    | 1345        | 23            | 1491        | 0.645        | 9                | 674        | 8          | 671        | 0.99         |
| 0007582 | physiological process                                          | 745                   | 617         | 806           | 708         | 0.454        | 365              | 318        | 380        | 299        | 0.378        |
| 0008152 | metabolism                                                     | 543                   | 819         | 580           | 934         | 0.414        | <b>254</b>       | <b>429</b> | <b>289</b> | <b>390</b> | <b>0.049</b> |
| 0009056 | catabolism                                                     | 106                   | 1256        | 93            | 1421        | 0.098        | 48               | 635        | 58         | 621        | 0.346        |
| 0006091 | energy pathways                                                | 55                    | 1307        | 51            | 1463        | 0.394        | <b>16</b>        | <b>667</b> | <b>39</b>  | <b>640</b> | <b>0.002</b> |
| 0006118 | electron transport                                             | 27                    | 1335        | 27            | 1487        | 0.799        | <b>7</b>         | <b>676</b> | <b>20</b>  | <b>659</b> | <b>0.019</b> |
| 0006139 | nucleobase, nucleoside, nucleotide and nucleic acid metabolism | 201                   | 1161        | 211           | 1303        | 0.566        | 102              | 581        | 99         | 580        | 0.914        |
| 0006259 | DNA metabolism                                                 | 40                    | 1322        | 33            | 1481        | 0.242        | 16               | 667        | 24         | 655        | 0.253        |
| 0006350 | transcription                                                  | 114                   | 1248        | 99            | 1415        | 0.072        | 59               | 624        | 55         | 624        | 0.794        |
| 0043170 | macromolecule metabolism                                       | 290                   | 1072        | 321           | 1193        | 0.989        | 136              | 547        | 154        | 525        | 0.237        |
| 0019538 | protein metabolism                                             | 247                   | 1115        | 266           | 1248        | 0.729        | 114              | 569        | 133        | 546        | 0.188        |
| 0006412 | protein biosynthesis                                           | 48                    | 1314        | 59            | 1455        | 0.668        | 19               | 664        | 29         | 650        | 0.179        |
| 0006464 | protein modification                                           | 129                   | 1233        | 123           | 1391        | 0.226        | 67               | 616        | 62         | 617        | 0.738        |
| 0006457 | protein folding                                                | 17                    | 1345        | 25            | 1489        | 0.457        | 9                | 674        | 8          | 671        | 0.99         |
| 0005975 | carbohydrate metabolism                                        | 47                    | 1315        | 57            | 1457        | 0.726        | 23               | 660        | 24         | 655        | 0.984        |
| 0006519 | amino acid and derivative metabolism                           | 30                    | 1332        | 40            | 1474        | 0.521        | 17               | 666        | 13         | 666        | 0.591        |
| 0006629 | lipid metabolism                                               | 35                    | 1327        | 48            | 1466        | 0.396        | 15               | 668        | 20         | 659        | 0.482        |
| 0009308 | amine metabolism                                               | 31                    | 1331        | 49            | 1465        | 0.147        | 18               | 665        | 13         | 666        | 0.478        |
| 0042440 | pigment metabolism                                             | 5                     | 1357        | 7             | 1507        | 0.916        | 3                | 680        | 2          | 677        | 0.995        |
| 0042445 | hormone metabolism                                             | 3                     | 1359        | 4             | 1510        | 0.889        | 1                | 682        | 2          | 677        | 0.996        |
| 0009058 | biosynthesis                                                   | 91                    | 1271        | 109           | 1405        | 0.637        | 41               | 642        | 50         | 629        | 0.37         |
| 0019748 | secondary metabolism                                           | 7                     | 1355        | 7             | 1507        | 0.944        | 4                | 679        | 3          | 676        | 0.994        |
| 0019222 | regulation of metabolism                                       | 111                   | 1251        | 116           | 1398        | 0.678        | 57               | 626        | 54         | 625        | 0.868        |
| 0016265 | death                                                          | 43                    | 1319        | 39            | 1475        | 0.411        | 22               | 661        | 21         | 658        | 0.984        |
| 0008219 | cell death                                                     | 38                    | 1324        | 34            | 1480        | 0.416        | 19               | 664        | 19         | 660        | 0.884        |
| 0016271 | tissue death                                                   | 17                    | 1345        | 9             | 1505        | 0.099        | 7                | 676        | 10         | 669        | 0.617        |
| 0042592 | homeostasis                                                    | 13                    | 1349        | 15            | 1499        | 0.927        | 7                | 676        | 6          | 673        | 0.992        |
| 0019725 | cell homeostasis                                               | 12                    | 1350        | 13            | 1501        | 0.891        | 6                | 677        | 6          | 673        | 0.78         |
| 0050801 | ion homeostasis                                                | 4                     | 1358        | 10            | 1504        | 0.253        | 3                | 680        | 1          | 678        | 0.621        |
| 0043062 | extracellular structure organization and biogenesis            | 7                     | 1355        | 10            | 1504        | 0.788        | 4                | 679        | 3          | 676        | 0.994        |
| 0046903 | secretion                                                      | 51                    | 1311        | 49            | 1465        | 0.522        | 28               | 655        | 23         | 656        | 0.583        |
| 0048511 | rhythmic process                                               | 7                     | 1355        | 10            | 1504        | 0.788        | 5                | 678        | 2          | 677        | 0.453        |

Hive bee-to-forager, experience independent ([d8, d12, d17] → d17F; forager not different than hive-restricted, p>0.2)

| GO#     | GO term                                                       | Representational bias |             |               |             |              | Directional bias |            |            |            |             |
|---------|---------------------------------------------------------------|-----------------------|-------------|---------------|-------------|--------------|------------------|------------|------------|------------|-------------|
|         |                                                               | regulated             |             | not regulated |             | p            | up-reg.          |            | down-reg.  |            | p           |
|         |                                                               | term                  | n.term      | term          | n.term      |              | term             | n.term     | term       | n.term     |             |
| 0050791 | regulation of physiological process                           | 165                   | 1197        | 167           | 1347        | 0.395        | 83               | 600        | 82         | 597        | 0.968       |
| 0050874 | organismal physiological process                              | 118                   | 1244        | 105           | 1409        | 0.097        | 60               | 623        | 58         | 621        | 0.95        |
| 0050875 | cellular physiological process                                | 708                   | 654         | 763           | 751         | 0.417        | 346              | 337        | 362        | 317        | 0.354       |
| 0006810 | transport                                                     | 174                   | 1188        | 218           | 1296        | 0.225        | 87               | 596        | 87         | 592        | 0.968       |
| 0006811 | ion transport                                                 | 52                    | 1310        | 67            | 1447        | 0.47         | 22               | 661        | 30         | 649        | 0.312       |
| 0006818 | hydrogen transport                                            | 12                    | 1350        | 6             | 1508        | 0.159        | 4                | 679        | 8          | 671        | 0.379       |
| 0006836 | neurotransmitter transport                                    | 3                     | 1359        | 2             | 1512        | 0.906        | 1                | 682        | 2          | 677        | 0.996       |
| 0006858 | extracellular transport                                       | 6                     | 1356        | 9             | 1505        | 0.754        | 2                | 681        | 4          | 675        | 0.677       |
| 0006869 | lipid transport                                               | 6                     | 1356        | 8             | 1506        | 0.944        | 2                | 681        | 4          | 675        | 0.677       |
| 0008643 | carbohydrate transport                                        | 5                     | 1357        | 10            | 1504        | 0.406        | 3                | 680        | 2          | 677        | 0.995       |
| 0015031 | protein transport                                             | 77                    | 1285        | 101           | 1413        | 0.292        | 38               | 645        | 39         | 640        | 0.979       |
| 0015837 | amine transport                                               | 6                     | 1356        | 6             | 1508        | 0.916        | 2                | 681        | 4          | 675        | 0.677       |
| 0015931 | nucleobase, nucleoside, nucleotide and nucleic acid transport | 7                     | 1355        | 5             | 1509        | 0.636        | 4                | 679        | 3          | 676        | 0.994       |
| 0016192 | vesicle-mediated transport                                    | 57                    | 1305        | 60            | 1454        | 0.836        | 31               | 652        | 26         | 653        | 0.604       |
| 0045045 | secretory pathway                                             | 47                    | 1315        | 47            | 1467        | 0.677        | 25               | 658        | 22         | 657        | 0.782       |
| 0046907 | intracellular transport                                       | 87                    | 1275        | 109           | 1405        | 0.43         | 42               | 641        | 45         | 634        | 0.803       |
| 0051049 | regulation of transport                                       | 6                     | 1356        | 12            | 1502        | 0.338        | 2                | 681        | 4          | 675        | 0.677       |
| 0008283 | cell proliferation                                            | 40                    | 1322        | 27            | 1487        | 0.054        | 22               | 661        | 18         | 661        | 0.644       |
| 0007049 | cell cycle                                                    | 68                    | 1294        | 55            | 1459        | 0.088        | 29               | 654        | 39         | 640        | 0.252       |
| 0017145 | stem cell division                                            | 6                     | 1356        | 5             | 1509        | 0.86         | 3                | 680        | 3          | 676        | 0.688       |
| 0016043 | cell organization and biogenesis                              | 140                   | 1222        | 125           | 1389        | 0.071        | 69               | 614        | 71         | 608        | 0.9         |
| 0000902 | cellular morphogenesis                                        | 39                    | 1323        | 38            | 1476        | 0.638        | 23               | 660        | 16         | 663        | 0.339       |
| 0006996 | organelle organization and biogenesis                         | 121                   | 1241        | 109           | 1405        | 0.111        | 56               | 627        | 65         | 614        | 0.426       |
| 0007010 | cytoskeleton organization and biogenesis                      | 88                    | 1274        | 77            | 1437        | 0.133        | 39               | 644        | 49         | 630        | 0.308       |
| 0006997 | nuclear organization and biogenesis                           | 5                     | 1357        | 4             | 1510        | 0.874        | 5                | 678        | 0          | 679        | 0.074       |
| 0007028 | cytoplasm organization and biogenesis                         | 9                     | 1353        | 9             | 1505        | 0.991        | 7                | 676        | 2          | 677        | 0.184       |
| 0016044 | membrane organization and biogenesis                          | 7                     | 1355        | 1             | 1513        | 0.055        | 4                | 679        | 3          | 676        | 0.994       |
| 0051128 | regulation of cell organization and biogenesis                | 5                     | 1357        | 6             | 1508        | 0.86         | 1                | 682        | 4          | 675        | 0.367       |
| 0016049 | cell growth                                                   | 5                     | 1357        | 3             | 1511        | 0.614        | 2                | 681        | 3          | 676        | 0.995       |
| 0050896 | response to stimulus                                          | 83                    | 1279        | 92            | 1422        | 0.953        | 45               | 638        | 38         | 641        | 0.514       |
| 0006950 | response to stress                                            | 30                    | 1332        | 25            | 1489        | 0.346        | 19               | 664        | 11         | 668        | 0.202       |
| 0009408 | response to heat                                              | 5                     | 1357        | 4             | 1510        | 0.874        | 4                | 679        | 1          | 678        | 0.374       |
| 0006979 | response to oxidative stress                                  | 1                     | 1361        | 1             | 1513        | 0.526        | 1                | 682        | 0          | 679        | 0.998       |
| 0051179 | localization                                                  | 192                   | 1170        | 230           | 1284        | 0.438        | 95               | 588        | 97         | 582        | 0.903       |
| 0006403 | RNA localization                                              | 14                    | 1348        | 16            | 1498        | 0.914        | 6                | 677        | 8          | 671        | 0.78        |
| 0008104 | protein localization                                          | 86                    | 1276        | 107           | 1407        | 0.465        | 43               | 640        | 43         | 636        | 0.934       |
| 0051234 | establishment of localization                                 | 178                   | 1184        | 219           | 1295        | 0.303        | 90               | 593        | 88         | 591        | 0.969       |
| 0051235 | maintenance of localization                                   | 0                     | 1362        | 3             | 1511        | 0.287        | 0                | 683        | 0          | 679        | -           |
| 0050789 | regulation of biological process                              | 197                   | 1165        | 191           | 1323        | 0.163        | 102              | 581        | 95         | 584        | 0.676       |
| 0050790 | regulation of enzyme activity                                 | 7                     | 1355        | 7             | 1507        | 0.944        | 4                | 679        | 3          | 676        | 0.994       |
| 0040029 | regulation of gene expression, epigenetic                     | <b>17</b>             | <b>1345</b> | <b>2</b>      | <b>1512</b> | <b>5E-04</b> | 6                | 677        | 11         | 668        | 0.323       |
| 0006306 | DNA methylation                                               | <b>7</b>              | <b>1355</b> | <b>0</b>      | <b>1514</b> | <b>0.016</b> | 3                | 680        | 4          | 675        | 0.994       |
| 0045814 | negative regulation of gene expression, epigenetic            | 5                     | 1357        | 1             | 1513        | 0.175        | 1                | 682        | 4          | 675        | 0.367       |
| 0006342 | chromatin silencing                                           | 5                     | 1357        | 1             | 1513        | 0.175        | 1                | 682        | 4          | 675        | 0.367       |
| 0003674 | molecular_function                                            | 812                   | 550         | 856           | 658         | 0.103        | 390              | 293        | 422        | 257        | 0.065       |
| 0016209 | antioxidant activity                                          | 5                     | 1357        | 4             | 1510        | 0.874        | 0                | 683        | 5          | 674        | 0.072       |
| 0005488 | binding                                                       | 468                   | 894         | 498           | 1016        | 0.428        | 232              | 451        | 236        | 443        | 0.803       |
| 0005509 | calcium ion binding                                           | 31                    | 1331        | 29            | 1485        | 0.586        | 16               | 667        | 15         | 664        | 0.987       |
| 0030246 | carbohydrate binding                                          | 6                     | 1356        | 8             | 1506        | 0.944        | 4                | 679        | 2          | 677        | 0.688       |
| 0008289 | lipid binding                                                 | 14                    | 1348        | 11            | 1503        | 0.504        | 5                | 678        | 9          | 670        | 0.414       |
| 0003676 | nucleic acid binding                                          | 174                   | 1188        | 196           | 1318        | 0.936        | 75               | 608        | 99         | 580        | 0.056       |
| 0003677 | DNA binding                                                   | 89                    | 1273        | 90            | 1424        | 0.564        | 41               | 642        | 48         | 631        | 0.492       |
| 0003682 | chromatin binding                                             | 11                    | 1351        | 11            | 1503        | 0.972        | 6                | 677        | 5          | 674        | 0.992       |
| 0003700 | transcription factor activity                                 | 32                    | 1330        | 47            | 1467        | 0.262        | 17               | 666        | 15         | 664        | 0.871       |
| 0003723 | RNA binding                                                   | 51                    | 1311        | 66            | 1448        | 0.46         | 20               | 663        | 31         | 648        | 0.147       |
| 0008135 | translation factor activity, nucleic acid binding             | 13                    | 1349        | 22            | 1492        | 0.295        | 6                | 677        | 7          | 672        | 0.992       |
| 0000166 | nucleotide binding                                            | 124                   | 1238        | 123           | 1391        | 0.384        | 62               | 621        | 62         | 617        | 0.952       |
| 0005515 | protein binding                                               | <b>196</b>            | <b>1166</b> | <b>170</b>    | <b>1344</b> | <b>0.013</b> | 103              | 580        | 93         | 586        | 0.515       |
| 0008134 | transcription factor binding                                  | <b>20</b>             | <b>1342</b> | <b>9</b>      | <b>1505</b> | <b>0.031</b> | 9                | 674        | 11         | 668        | 0.811       |
| 0008092 | cytoskeletal protein binding                                  | <b>51</b>             | <b>1311</b> | <b>34</b>     | <b>1480</b> | <b>0.024</b> | 23               | 660        | 28         | 651        | 0.554       |
| 0003779 | actin binding                                                 | 30                    | 1332        | 22            | 1492        | 0.172        | 14               | 669        | 16         | 663        | 0.841       |
| 0003824 | catalytic activity                                            | 397                   | 965         | 413           | 1101        | 0.284        | <b>179</b>       | <b>504</b> | <b>218</b> | <b>461</b> | <b>0.02</b> |
| 0016787 | hydrolase activity                                            | 162                   | 1200        | 187           | 1327        | 0.751        | 74               | 609        | 88         | 591        | 0.259       |
| 0003924 | GTPase activity                                               | 16                    | 1346        | 23            | 1491        | 0.525        | 4                | 679        | 12         | 667        | 0.076       |
| 0004518 | nuclease activity                                             | 4                     | 1358        | 8             | 1506        | 0.493        | 2                | 681        | 2          | 677        | 0.621       |

Hive bee-to-forager, experience independent ([d8, d12, d17] → d17F; forager not different than hive-restricted, p>0.2)

| GO#     | GO term                                    | Representational bias |             |               |             |              | Directional bias |            |            |            |              |
|---------|--------------------------------------------|-----------------------|-------------|---------------|-------------|--------------|------------------|------------|------------|------------|--------------|
|         |                                            | regulated             |             | not regulated |             | $\rho$       | up-reg.          |            | down-reg.  |            | $\rho$       |
|         |                                            | term                  | n.term      | term          | n.term      |              | term             | n.term     | term       | n.term     |              |
| 0008233 | peptidase activity                         | 59                    | 1303        | 53            | 1461        | 0.292        | 25               | 658        | 34         | 645        | 0.277        |
| 0004721 | phosphoprotein phosphatase activity        | <b>7</b>              | <b>1355</b> | <b>21</b>     | <b>1493</b> | <b>0.028</b> | 3                | 680        | 4          | 675        | 0.994        |
| 0016740 | transferase activity                       | 125                   | 1237        | 108           | 1406        | 0.053        | 60               | 623        | 65         | 614        | 0.682        |
| 0016301 | kinase activity                            | 73                    | 1289        | 61            | 1453        | 0.109        | 41               | 642        | 32         | 647        | 0.349        |
| 0004672 | protein kinase activity                    | 54                    | 1308        | 40            | 1474        | 0.059        | 29               | 654        | 25         | 654        | 0.693        |
| 0030234 | enzyme regulator activity                  | 50                    | 1312        | 51            | 1463        | 0.735        | 26               | 657        | 24         | 655        | 0.902        |
| 0003774 | motor activity                             | 13                    | 1349        | 12            | 1502        | 0.79         | 7                | 676        | 6          | 673        | 0.992        |
| 0004871 | signal transducer activity                 | <b>137</b>            | <b>1225</b> | <b>108</b>    | <b>1406</b> | <b>0.006</b> | 76               | 607        | 61         | 618        | 0.221        |
| 0004872 | receptor activity                          | 57                    | 1305        | 48            | 1466        | 0.177        | 24               | 659        | 33         | 646        | 0.269        |
| 0004879 | ligand-dependent nuclear receptor activity | 4                     | 1358        | 5             | 1509        | 0.874        | 2                | 681        | 2          | 677        | 0.621        |
| 0004888 | transmembrane receptor activity            | 38                    | 1324        | 32            | 1482        | 0.292        | 16               | 667        | 22         | 657        | 0.4          |
| 0004930 | G-protein coupled receptor activity        | 16                    | 1346        | 11            | 1503        | 0.293        | 7                | 676        | 9          | 670        | 0.792        |
| 0005057 | receptor signaling protein activity        | <b>48</b>             | <b>1314</b> | <b>30</b>     | <b>1484</b> | <b>0.015</b> | 28               | 655        | 20         | 659        | 0.313        |
| 0005102 | receptor binding                           | 38                    | 1324        | 26            | 1488        | 0.069        | 24               | 659        | 14         | 665        | 0.144        |
| 0005198 | structural molecule activity               | <b>86</b>             | <b>1276</b> | <b>69</b>     | <b>1445</b> | <b>0.045</b> | 37               | 646        | 49         | 630        | 0.21         |
| 0030528 | transcription regulator activity           | 97                    | 1265        | 88            | 1426        | 0.176        | 51               | 632        | 46         | 633        | 0.695        |
| 0045182 | translation regulator activity             | 13                    | 1349        | 22            | 1492        | 0.295        | 6                | 677        | 7          | 672        | 0.992        |
| 0005215 | transporter activity                       | 107                   | 1255        | 141           | 1373        | 0.186        | <b>41</b>        | <b>642</b> | <b>66</b>  | <b>613</b> | <b>0.014</b> |
| 0005489 | electron transporter activity              | 13                    | 1349        | 15            | 1499        | 0.927        | <b>2</b>         | <b>681</b> | <b>11</b>  | <b>668</b> | <b>0.025</b> |
| 0005216 | ion channel activity                       | 22                    | 1340        | 29            | 1485        | 0.64         | 8                | 675        | 14         | 665        | 0.276        |
| 0005244 | voltage-gated ion channel activity         | 13                    | 1349        | 13            | 1501        | 0.941        | 6                | 677        | 7          | 672        | 0.992        |
| 0005575 | cellular_component                         | 565                   | 797         | 614           | 900         | 0.64         | <b>253</b>       | <b>430</b> | <b>312</b> | <b>367</b> | <b>0.001</b> |
| 0005623 | cell                                       | 512                   | 850         | 560           | 954         | 0.767        | <b>230</b>       | <b>453</b> | <b>282</b> | <b>397</b> | <b>0.003</b> |
| 0005622 | intracellular                              | 408                   | 954         | 419           | 1095        | 0.191        | <b>177</b>       | <b>506</b> | <b>231</b> | <b>448</b> | <b>0.001</b> |
| 0005737 | cytoplasm                                  | 223                   | 1139        | 226           | 1288        | 0.31         | <b>80</b>        | <b>603</b> | <b>143</b> | <b>536</b> | <b>4E-06</b> |
| 0016023 | cytoplasmic vesicle                        | 21                    | 1341        | 19            | 1495        | 0.62         | 11               | 672        | 10         | 669        | 0.989        |
| 0005829 | cytosol                                    | 42                    | 1320        | 37            | 1477        | 0.35         | 16               | 667        | 26         | 653        | 0.153        |
| 0005783 | endoplasmic reticulum                      | 26                    | 1336        | 31            | 1483        | 0.895        | 10               | 673        | 16         | 663        | 0.315        |
| 0005794 | Golgi apparatus                            | 14                    | 1348        | 11            | 1503        | 0.504        | 8                | 675        | 6          | 673        | 0.797        |
| 0005815 | microtubule organizing center              | 4                     | 1358        | 5             | 1509        | 0.874        | 2                | 681        | 2          | 677        | 0.621        |
| 0005739 | mitochondrion                              | <b>62</b>             | <b>1300</b> | <b>41</b>     | <b>1473</b> | <b>0.011</b> | <b>12</b>        | <b>671</b> | <b>50</b>  | <b>629</b> | <b>1E-06</b> |
| 0005840 | ribosome                                   | 14                    | 1348        | 9             | 1505        | 0.274        | 4                | 679        | 10         | 669        | 0.176        |
| 0005773 | vacuole                                    | 8                     | 1354        | 6             | 1508        | 0.641        | 2                | 681        | 6          | 673        | 0.284        |
| 0005764 | lysosome                                   | 3                     | 1359        | 2             | 1512        | 0.906        | 1                | 682        | 2          | 677        | 0.996        |
| 0005856 | cytoskeleton                               | 41                    | 1321        | 39            | 1475        | 0.553        | 18               | 665        | 23         | 656        | 0.513        |
| 0005694 | chromosome                                 | 22                    | 1340        | 16            | 1498        | 0.252        | 8                | 675        | 14         | 665        | 0.276        |
| 0000228 | nuclear chromosome                         | 4                     | 1358        | 1             | 1513        | 0.31         | 1                | 682        | 3          | 676        | 0.612        |
| 0005634 | nucleus                                    | 168                   | 1194        | 184           | 1330        | 0.927        | 83               | 600        | 85         | 594        | 0.902        |
| 0005635 | nuclear membrane                           | 5                     | 1357        | 11            | 1503        | 0.297        | 5                | 678        | 0          | 679        | 0.074        |
| 0005730 | nucleolus                                  | 5                     | 1357        | 6             | 1508        | 0.86         | 2                | 681        | 3          | 676        | 0.995        |
| 0005654 | nucleoplasm                                | 33                    | 1329        | 33            | 1481        | 0.756        | 16               | 667        | 17         | 662        | 0.986        |
| 0005777 | peroxisome                                 | 5                     | 1357        | 4             | 1510        | 0.874        | 2                | 681        | 3          | 676        | 0.995        |
| 0005886 | plasma membrane                            | 69                    | 1293        | 80            | 1434        | 0.858        | <b>26</b>        | <b>657</b> | <b>43</b>  | <b>636</b> | <b>0.045</b> |
| 0005576 | extracellular region                       | 30                    | 1332        | 43            | 1471        | 0.334        | 14               | 669        | 16         | 663        | 0.841        |
| 0005578 | extracellular matrix (sensu Metazoa)       | 12                    | 1350        | 22            | 1492        | 0.213        | 4                | 679        | 8          | 671        | 0.379        |

Subspecies (*ligustica* relative to *mellifera*)

| GO#     | GO term                                                                           | Representational bias |            |               |             |              | Directional bias |        |           |        |        |
|---------|-----------------------------------------------------------------------------------|-----------------------|------------|---------------|-------------|--------------|------------------|--------|-----------|--------|--------|
|         |                                                                                   | regulated             |            | not regulated |             | $\rho$       | up-reg.          |        | down-reg. |        | $\rho$ |
|         |                                                                                   | term                  | n.term     | term          | n.term      |              | term             | n.term | term      | n.term |        |
| 0008150 | biological_process                                                                | 391                   | 313        | 1363          | 922         | 0.058        | 213              | 160    | 178       | 153    | 0.417  |
| 0007610 | behavior                                                                          | 35                    | 669        | 127           | 2158        | 0.613        | 18               | 355    | 17        | 314    | 0.988  |
| 0030534 | adult behavior                                                                    | 2                     | 702        | 22            | 2263        | 0.128        | 1                | 372    | 1         | 330    | 0.532  |
| 0030537 | larval behavior                                                                   | 1                     | 703        | 8             | 2277        | 0.626        | 0                | 373    | 1         | 330    | 0.952  |
| 0007611 | learning and/or memory                                                            | 3                     | 701        | 21            | 2264        | 0.298        | 2                | 371    | 1         | 330    | 0.917  |
| 0007612 | learning                                                                          | 2                     | 702        | 13            | 2272        | 0.529        | 1                | 372    | 1         | 330    | 0.532  |
| 0007613 | memory                                                                            | 1                     | 703        | 10            | 2275        | 0.437        | 1                | 372    | 0         | 331    | 0.952  |
| 0007626 | locomotory behavior                                                               | 27                    | 677        | 96            | 2189        | 0.75         | 16               | 357    | 11        | 320    | 0.639  |
| 0007635 | chemosensory behavior                                                             | 3                     | 701        | 15            | 2270        | 0.68         | 1                | 372    | 2         | 329    | 0.917  |
| 0007622 | rhythmic behavior                                                                 | 2                     | 702        | 13            | 2272        | 0.529        | 1                | 372    | 1         | 330    | 0.532  |
| 0048512 | circadian behavior                                                                | 2                     | 702        | 12            | 2273        | 0.615        | 1                | 372    | 1         | 330    | 0.532  |
| 0009987 | cellular process                                                                  | <b>357</b>            | <b>347</b> | <b>1271</b>   | <b>1014</b> | <b>0.025</b> | 198              | 175    | 159       | 172    | 0.207  |
| 0007154 | cell communication                                                                | 112                   | 592        | 377           | 1908        | 0.755        | 64               | 309    | 48        | 283    | 0.391  |
| 0007155 | cell adhesion                                                                     | 25                    | 679        | 65            | 2220        | 0.405        | 13               | 360    | 12        | 319    | 0.917  |
| 0008037 | cell recognition                                                                  | 0                     | 704        | 2             | 2283        | 0.962        | 0                | 373    | 0         | 331    | -      |
| 0008038 | neuronal cell recognition                                                         | 0                     | 704        | 2             | 2283        | 0.962        | 0                | 373    | 0         | 331    | -      |
| 0016337 | cell-cell adhesion                                                                | 12                    | 692        | 27            | 2258        | 0.379        | 7                | 366    | 5         | 326    | 0.934  |
| 0016339 | calcium-dependent cell-cell adhesion                                              | 3                     | 701        | 4             | 2281        | 0.448        | 0                | 373    | 3         | 328    | 0.207  |
| 0007156 | homophilic cell adhesion                                                          | 4                     | 700        | 5             | 2280        | 0.278        | 1                | 372    | 3         | 328    | 0.534  |
| 0007160 | cell-matrix adhesion                                                              | 5                     | 699        | 4             | 2281        | 0.061        | 2                | 371    | 3         | 328    | 0.893  |
| 0007267 | cell-cell signaling                                                               | 36                    | 668        | 120           | 2165        | 0.962        | 20               | 353    | 16        | 315    | 0.884  |
| 0019226 | transmission of nerve impulse                                                     | 33                    | 671        | 105           | 2180        | 0.999        | 18               | 355    | 15        | 316    | 0.996  |
| 0007268 | synaptic transmission                                                             | 21                    | 683        | 80            | 2205        | 0.585        | 12               | 361    | 9         | 322    | 0.868  |
| 0007270 | nerve-nerve synaptic transmission                                                 | 5                     | 699        | 11            | 2274        | 0.666        | 2                | 371    | 3         | 328    | 0.893  |
| 0001505 | regulation of neurotransmitter levels                                             | 11                    | 693        | 49            | 2236        | 0.419        | 6                | 367    | 5         | 326    | 0.842  |
| 0042133 | neurotransmitter metabolism                                                       | 2                     | 702        | 6             | 2279        | 0.749        | 0                | 373    | 2         | 329    | 0.427  |
| 0007269 | neurotransmitter secretion                                                        | 10                    | 694        | 43            | 2242        | 0.517        | 6                | 367    | 4         | 327    | 0.898  |
| 0007165 | signal transduction                                                               | 85                    | 619        | 294           | 1991        | 0.626        | 51               | 322    | 34        | 297    | 0.205  |
| 0007166 | cell surface receptor linked signal transduction                                  | 34                    | 670        | 123           | 2162        | 0.632        | 17               | 356    | 17        | 314    | 0.856  |
| 0007167 | enzyme linked receptor protein signaling pathway                                  | 8                     | 696        | 38            | 2247        | 0.414        | 4                | 369    | 4         | 327    | 0.852  |
| 0007178 | transmembrane receptor protein serine/threonine kinase signaling pathway          | 3                     | 701        | 13            | 2272        | 0.874        | 2                | 371    | 1         | 330    | 0.917  |
| 0007179 | transforming growth factor beta receptor signaling pathway                        | 1                     | 703        | 8             | 2277        | 0.626        | 0                | 373    | 1         | 330    | 0.952  |
| 0007169 | transmembrane receptor protein tyrosine kinase signaling pathway                  | 6                     | 698        | 26            | 2259        | 0.664        | 3                | 370    | 3         | 328    | 0.792  |
| 0007173 | epidermal growth factor receptor signaling pathway                                | 2                     | 702        | 6             | 2279        | 0.749        | 1                | 372    | 1         | 330    | 0.532  |
| 0008286 | insulin receptor signaling pathway                                                | 0                     | 704        | 4             | 2281        | 0.602        | 0                | 373    | 0         | 331    | -      |
| 0008293 | torso signaling pathway                                                           | 0                     | 704        | 7             | 2278        | 0.306        | 0                | 373    | 0         | 331    | -      |
| 0007186 | G-protein coupled receptor protein signaling pathway                              | 19                    | 685        | 52            | 2233        | 0.615        | 11               | 362    | 8         | 323    | 0.84   |
| 0007200 | G-protein signaling, coupled to IP3 second messenger (phospholipase C activating) | 3                     | 701        | 2             | 2283        | 0.163        | 2                | 371    | 1         | 330    | 0.917  |
| 0007219 | Notch signaling pathway                                                           | 1                     | 703        | 12            | 2273        | 0.306        | 0                | 373    | 1         | 330    | 0.952  |
| 0007224 | smoothened signaling pathway                                                      | 0                     | 704        | 6             | 2279        | 0.379        | 0                | 373    | 0         | 331    | -      |
| 0008063 | Toll signaling pathway                                                            | 0                     | 704        | 4             | 2281        | 0.602        | 0                | 373    | 0         | 331    | -      |
| 0016055 | Wnt receptor signaling pathway                                                    | 3                     | 701        | 13            | 2272        | 0.874        | 2                | 371    | 1         | 330    | 0.917  |
| 0007242 | intracellular signaling cascade                                                   | 41                    | 663        | 141           | 2144        | 0.805        | 28               | 345    | 13        | 318    | 0.063  |
| 0007263 | nitric oxide mediated signal transduction                                         | 1                     | 703        | 3             | 2282        | 0.602        | 1                | 372    | 0         | 331    | 0.952  |
| 0007243 | protein kinase cascade                                                            | 9                     | 695        | 32            | 2253        | 0.954        | 6                | 367    | 3         | 328    | 0.623  |
| 0007259 | JAK-STAT cascade                                                                  | 2                     | 702        | 4             | 2281        | 0.933        | 1                | 372    | 1         | 330    | 0.532  |
| 0000165 | MAPKKK cascade                                                                    | 7                     | 697        | 26            | 2259        | 0.91         | 5                | 368    | 2         | 329    | 0.547  |
| 0019932 | second-messenger-mediated signaling                                               | <b>10</b>             | <b>694</b> | <b>12</b>     | <b>2273</b> | <b>0.029</b> | 8                | 365    | 2         | 329    | 0.16   |
| 0019722 | calcium-mediated signaling                                                        | 7                     | 697        | 8             | 2277        | 0.07         | 6                | 367    | 1         | 330    | 0.173  |
| 0048015 | phosphoinositide-mediated signaling                                               | 3                     | 701        | 2             | 2283        | 0.163        | 2                | 371    | 1         | 330    | 0.917  |
| 0007264 | small GTPase mediated signal transduction                                         | 9                     | 695        | 35            | 2250        | 0.757        | 7                | 366    | 2         | 329    | 0.244  |
| 0007265 | Ras protein signal transduction                                                   | 3                     | 701        | 7             | 2278        | 0.914        | 2                | 371    | 1         | 330    | 0.917  |
| 0009966 | regulation of signal transduction                                                 | 10                    | 694        | 24            | 2261        | 0.544        | 6                | 367    | 4         | 327    | 0.898  |
| 0007275 | development                                                                       | 102                   | 602        | 358           | 1927        | 0.485        | 51               | 322    | 51        | 280    | 0.585  |
| 0007568 | aging                                                                             | 3                     | 701        | 8             | 2277        | 0.948        | 0                | 373    | 3         | 328    | 0.207  |
| 0030154 | cell differentiation                                                              | 23                    | 681        | 96            | 2189        | 0.318        | 13               | 360    | 10        | 321    | 0.894  |
| 0048468 | cell development                                                                  | 13                    | 691        | 62            | 2223        | 0.251        | 8                | 365    | 5         | 326    | 0.731  |
| 0000904 | cellular morphogenesis during differentiation                                     | 3                     | 701        | 16            | 2269        | 0.597        | 1                | 372    | 2         | 329    | 0.917  |
| 0042461 | photoreceptor cell development                                                    | 3                     | 701        | 15            | 2270        | 0.68         | 1                | 372    | 2         | 329    | 0.917  |
| 0042051 | eye photoreceptor development (sensu Endopterygota)                               | 2                     | 702        | 15            | 2270        | 0.389        | 1                | 372    | 1         | 330    | 0.532  |
| 0045165 | cell fate commitment                                                              | 11                    | 693        | 38            | 2247        | 0.989        | 7                | 366    | 4         | 327    | 0.682  |

Subspecies (*ligustica* relative to *mellifera*)

| GO#     | GO term                                                        | Representational bias |            |               |             |             | Directional bias |            |           |            |              |
|---------|----------------------------------------------------------------|-----------------------|------------|---------------|-------------|-------------|------------------|------------|-----------|------------|--------------|
|         |                                                                | regulated             |            | not regulated |             |             | up-reg.          |            | down-reg. |            |              |
|         |                                                                | term                  | n.term     | term          | n.term      | p           | term             | n.term     | term      | n.term     | p            |
| 0001709 | cell fate determination                                        | 9                     | 695        | 21            | 2264        | 0.535       | 5                | 368        | 4         | 327        | 0.857        |
| 0007400 | neuroblast cell fate determination                             | 4                     | 700        | 4             | 2281        | 0.178       | 3                | 370        | 1         | 330        | 0.702        |
| 0001708 | cell fate specification                                        | 1                     | 703        | 7             | 2278        | 0.749       | 0                | 373        | 1         | 330        | 0.952        |
| 0007349 | cellularization                                                | 1                     | 703        | 10            | 2275        | 0.437       | 1                | 372        | 0         | 331        | 0.952        |
| 0040007 | growth                                                         | 5                     | 699        | 31            | 2254        | 0.239       | 3                | 370        | 2         | 329        | 0.893        |
| 0002164 | larval development                                             | 1                     | 703        | 16            | 2269        | 0.151       | 1                | 372        | 0         | 331        | 0.952        |
| 0002165 | larval or pupal development (sensu Insecta)                    | 25                    | 679        | 104           | 2181        | 0.3         | 9                | 364        | 16        | 315        | 0.126        |
| 0007552 | metamorphosis                                                  | 24                    | 680        | 97            | 2188        | 0.382       | 9                | 364        | 15        | 316        | 0.181        |
| 0009653 | morphogenesis                                                  | 78                    | 626        | 241           | 2044        | 0.741       | 44               | 329        | 34        | 297        | 0.601        |
| 0002009 | morphogenesis of an epithelium                                 | 7                     | 697        | 37            | 2248        | 0.305       | 5                | 368        | 2         | 329        | 0.547        |
| 0009887 | organogenesis                                                  | 71                    | 633        | 211           | 2074        | 0.547       | 39               | 334        | 32        | 299        | 0.825        |
| 0001654 | eye morphogenesis                                              | 11                    | 693        | 46            | 2239        | 0.544       | 7                | 366        | 4         | 327        | 0.682        |
| 0008406 | gonad development                                              | 4                     | 700        | 7             | 2278        | 0.517       | 2                | 371        | 2         | 329        | 0.702        |
| 0007444 | imaginal disc development                                      | 22                    | 682        | 71            | 2214        | 0.92        | 9                | 364        | 13        | 318        | 0.349        |
| 0007494 | midgut development                                             | 2                     | 702        | 3             | 2282        | 0.734       | 2                | 371        | 0         | 331        | 0.532        |
| 0007517 | muscle development                                             | 9                     | 695        | 25            | 2260        | 0.841       | 6                | 367        | 3         | 328        | 0.623        |
| 0007399 | neurogenesis                                                   | 36                    | 668        | 126           | 2159        | 0.753       | 23               | 350        | 13        | 318        | 0.24         |
| 0007409 | axonogenesis                                                   | 11                    | 693        | 32            | 2253        | 0.893       | 4                | 369        | 7         | 324        | 0.419        |
| 0007411 | axon guidance                                                  | 7                     | 697        | 26            | 2259        | 0.91        | 2                | 371        | 5         | 326        | 0.358        |
| 0007417 | central nervous system development                             | 9                     | 695        | 30            | 2255        | 0.905       | 4                | 369        | 5         | 326        | 0.857        |
| 0016358 | dendrite morphogenesis                                         | 4                     | 700        | 10            | 2275        | 0.898       | 1                | 372        | 3         | 328        | 0.534        |
| 0042063 | gliogenesis                                                    | 3                     | 701        | 8             | 2277        | 0.948       | 2                | 371        | 1         | 330        | 0.917        |
| 0007422 | peripheral nervous system development                          | 7                     | 697        | 33            | 2252        | 0.471       | 5                | 368        | 2         | 329        | 0.547        |
| 0050767 | regulation of neurogenesis                                     | 3                     | 701        | 2             | 2283        | 0.163       | 0                | 373        | 3         | 328        | 0.207        |
| 0007424 | tracheal system development (sensu Insecta)                    | 5                     | 699        | 32            | 2253        | 0.21        | 4                | 369        | 1         | 330        | 0.444        |
| 0048513 | organ development                                              | 72                    | 632        | 214           | 2071        | 0.544       | 39               | 334        | 33        | 298        | 0.93         |
| 0007389 | pattern specification                                          | 12                    | 692        | 64            | 2221        | 0.139       | 7                | 366        | 5         | 326        | 0.934        |
| 0048066 | pigmentation                                                   | 3                     | 701        | 8             | 2277        | 0.948       | 0                | 373        | 3         | 328        | 0.207        |
| 0009791 | post-embryonic development                                     | 1                     | 703        | 16            | 2269        | 0.151       | 1                | 372        | 0         | 331        | 0.952        |
| 0009790 | embryonic development                                          | <b>14</b>             | <b>690</b> | <b>86</b>     | <b>2199</b> | <b>0.03</b> | 5                | 368        | 9         | 322        | 0.3          |
| 0007530 | sex determination                                              | 3                     | 701        | 7             | 2278        | 0.914       | 2                | 371        | 1         | 330        | 0.917        |
| 0007548 | sex differentiation                                            | 5                     | 699        | 14            | 2271        | 0.989       | 2                | 371        | 3         | 328        | 0.893        |
| 0019827 | stem cell maintenance                                          | 2                     | 702        | 6             | 2279        | 0.749       | 1                | 372        | 1         | 330        | 0.532        |
| 0000003 | reproduction                                                   | 27                    | 677        | 117           | 2168        | 0.196       | 17               | 356        | 10        | 321        | 0.388        |
| 0050793 | regulation of development                                      | 8                     | 696        | 35            | 2250        | 0.556       | 2                | 371        | 6         | 325        | 0.215        |
| 0007582 | physiological process                                          | 358                   | 346        | 1247          | 1038        | 0.091       | 198              | 175        | 160       | 171        | 0.237        |
| 0008152 | metabolism                                                     | 259                   | 445        | 907           | 1378        | 0.181       | 139              | 234        | 120       | 211        | 0.842        |
| 0009056 | catabolism                                                     | 48                    | 656        | 161           | 2124        | 0.902       | 23               | 350        | 25        | 306        | 0.563        |
| 0006091 | energy pathways                                                | 24                    | 680        | 84            | 2201        | 0.829       | <b>18</b>        | <b>355</b> | <b>6</b>  | <b>325</b> | <b>0.047</b> |
| 0006118 | electron transport                                             | 10                    | 694        | 45            | 2240        | 0.431       | 7                | 366        | 3         | 328        | 0.443        |
| 0006139 | nucleobase, nucleoside, nucleotide and nucleic acid metabolism | 90                    | 614        | 342           | 1943        | 0.168       | 45               | 328        | 45        | 286        | 0.621        |
| 0006259 | DNA metabolism                                                 | 16                    | 688        | 63            | 2222        | 0.571       | 5                | 368        | 11        | 320        | 0.131        |
| 0006350 | transcription                                                  | 50                    | 654        | 177           | 2108        | 0.629       | 22               | 351        | 28        | 303        | 0.241        |
| 0043170 | macromolecule metabolism                                       | 144                   | 560        | 484           | 1801        | 0.718       | 80               | 293        | 64        | 267        | 0.549        |
| 0019538 | protein metabolism                                             | 114                   | 590        | 413           | 1872        | 0.276       | 62               | 311        | 52        | 279        | 0.822        |
| 0006412 | protein biosynthesis                                           | 26                    | 678        | 84            | 2201        | 0.926       | 13               | 360        | 13        | 318        | 0.912        |
| 0006464 | protein modification                                           | 57                    | 647        | 199           | 2086        | 0.667       | 31               | 342        | 26        | 305        | 0.934        |
| 0006457 | protein folding                                                | 8                     | 696        | 35            | 2250        | 0.556       | 5                | 368        | 3         | 328        | 0.852        |
| 0005975 | carbohydrate metabolism                                        | 33                    | 671        | 74            | 2211        | 0.09        | 20               | 353        | 13        | 318        | 0.471        |
| 0006519 | amino acid and derivative metabolism                           | 20                    | 684        | 50            | 2235        | 0.39        | 7                | 366        | 13        | 318        | 0.159        |
| 0006629 | lipid metabolism                                               | 23                    | 681        | 66            | 2219        | 0.697       | 12               | 361        | 11        | 320        | 0.894        |
| 0009308 | amine metabolism                                               | 22                    | 682        | 59            | 2226        | 0.52        | 9                | 364        | 13        | 318        | 0.349        |
| 0042440 | pigment metabolism                                             | 3                     | 701        | 9             | 2276        | 0.824       | 0                | 373        | 3         | 328        | 0.207        |
| 0042445 | hormone metabolism                                             | 0                     | 704        | 7             | 2278        | 0.306       | 0                | 373        | 0         | 331        | -            |
| 0009058 | biosynthesis                                                   | 49                    | 655        | 155           | 2130        | 0.938       | 23               | 350        | 26        | 305        | 0.465        |
| 0019748 | secondary metabolism                                           | 3                     | 701        | 11            | 2274        | 0.898       | 0                | 373        | 3         | 328        | 0.207        |
| 0019222 | regulation of metabolism                                       | 50                    | 654        | 188           | 2097        | 0.376       | 23               | 350        | 27        | 304        | 0.379        |
| 0016265 | death                                                          | 19                    | 685        | 67            | 2218        | 0.846       | 9                | 364        | 10        | 321        | 0.792        |
| 0008219 | cell death                                                     | 15                    | 689        | 59            | 2226        | 0.593       | 8                | 365        | 7         | 324        | 0.815        |
| 0016271 | tissue death                                                   | 4                     | 700        | 23            | 2262        | 0.397       | 2                | 371        | 2         | 329        | 0.702        |
| 0042592 | homeostasis                                                    | 8                     | 696        | 21            | 2264        | 0.768       | 5                | 368        | 3         | 328        | 0.852        |
| 0019725 | cell homeostasis                                               | 6                     | 698        | 20            | 2265        | 0.861       | 4                | 369        | 2         | 329        | 0.792        |
| 0050801 | ion homeostasis                                                | 4                     | 700        | 10            | 2275        | 0.898       | 3                | 370        | 1         | 330        | 0.702        |
| 0043062 | extracellular structure organization and biogenesis            | 3                     | 701        | 16            | 2269        | 0.597       | 2                | 371        | 1         | 330        | 0.917        |
| 0046903 | secretion                                                      | 21                    | 683        | 80            | 2205        | 0.585       | 11               | 362        | 10        | 321        | 0.868        |
| 0048511 | rhythmic process                                               | 2                     | 702        | 15            | 2270        | 0.389       | 1                | 372        | 1         | 330        | 0.532        |

Subspecies (*ligustica* relative to *mellifera*)

| GO#     | GO term                                                       | Representational bias |            |               |             |              | Directional bias |        |           |        |        |
|---------|---------------------------------------------------------------|-----------------------|------------|---------------|-------------|--------------|------------------|--------|-----------|--------|--------|
|         |                                                               | regulated             |            | not regulated |             | $\rho$       | up-reg.          |        | down-reg. |        | $\rho$ |
|         |                                                               | term                  | n.term     | term          | n.term      |              | term             | n.term | term      | n.term |        |
| 0050791 | regulation of physiological process                           | 68                    | 636        | 279           | 2006        | 0.075        | 34               | 339    | 34        | 297    | 0.696  |
| 0050874 | organismal physiological process                              | 60                    | 644        | 172           | 2113        | 0.434        | 33               | 340    | 27        | 304    | 0.848  |
| 0050875 | cellular physiological process                                | <b>334</b>            | <b>370</b> | <b>1185</b>   | <b>1100</b> | <b>0.045</b> | 186              | 187    | 148       | 183    | 0.197  |
| 0006810 | transport                                                     | 81                    | 623        | 317           | 1968        | 0.12         | 45               | 328    | 36        | 295    | 0.708  |
| 0006811 | ion transport                                                 | 28                    | 676        | 92            | 2193        | 0.959        | 16               | 357    | 12        | 319    | 0.797  |
| 0006818 | hydrogen transport                                            | 5                     | 699        | 13            | 2272        | 0.885        | 3                | 370    | 2         | 329    | 0.893  |
| 0006836 | neurotransmitter transport                                    | 1                     | 703        | 4             | 2281        | 0.734        | 0                | 373    | 1         | 330    | 0.952  |
| 0006858 | extracellular transport                                       | 4                     | 700        | 11            | 2274        | 0.984        | 1                | 372    | 3         | 328    | 0.534  |
| 0006869 | lipid transport                                               | 1                     | 703        | 15            | 2270        | 0.18         | 0                | 373    | 1         | 330    | 0.952  |
| 0008643 | carbohydrate transport                                        | 5                     | 699        | 10            | 2275        | 0.555        | 1                | 372    | 4         | 327    | 0.301  |
| 0015031 | protein transport                                             | <b>27</b>             | <b>677</b> | <b>153</b>    | <b>2132</b> | <b>0.007</b> | 17               | 356    | 10        | 321    | 0.388  |
| 0015837 | amine transport                                               | 2                     | 702        | 10            | 2275        | 0.824        | 1                | 372    | 1         | 330    | 0.532  |
| 0015931 | nucleobase, nucleoside, nucleotide and nucleic acid transport | 2                     | 702        | 11            | 2274        | 0.713        | 1                | 372    | 1         | 330    | 0.532  |
| 0016192 | vesicle-mediated transport                                    | 24                    | 680        | 95            | 2190        | 0.437        | 16               | 357    | 8         | 323    | 0.247  |
| 0045045 | secretory pathway                                             | 19                    | 685        | 76            | 2209        | 0.48         | 11               | 362    | 8         | 323    | 0.84   |
| 0046907 | intracellular transport                                       | <b>29</b>             | <b>675</b> | <b>169</b>    | <b>2116</b> | <b>0.003</b> | 18               | 355    | 11        | 320    | 0.417  |
| 0051049 | regulation of transport                                       | 4                     | 700        | 14            | 2271        | 0.885        | 3                | 370    | 1         | 330    | 0.702  |
| 0008283 | cell proliferation                                            | 14                    | 690        | 57            | 2228        | 0.529        | 8                | 365    | 6         | 325    | 0.964  |
| 0007049 | cell cycle                                                    | 28                    | 676        | 100           | 2185        | 0.726        | 17               | 356    | 11        | 320    | 0.52   |
| 0017145 | stem cell division                                            | 3                     | 701        | 9             | 2276        | 0.824        | 3                | 370    | 0         | 331    | 0.291  |
| 0016043 | cell organization and biogenesis                              | 63                    | 641        | 212           | 2073        | 0.85         | 36               | 337    | 27        | 304    | 0.575  |
| 0000902 | cellular morphogenesis                                        | 13                    | 691        | 67            | 2218        | 0.154        | 9                | 364    | 4         | 327    | 0.366  |
| 0006996 | organelle organization and biogenesis                         | 55                    | 649        | 183           | 2102        | 0.929        | 31               | 342    | 24        | 307    | 0.702  |
| 0007010 | cytoskeleton organization and biogenesis                      | 42                    | 662        | 128           | 2157        | 0.786        | 27               | 346    | 15        | 316    | 0.176  |
| 0006997 | nuclear organization and biogenesis                           | 1                     | 703        | 9             | 2276        | 0.523        | 0                | 373    | 1         | 330    | 0.952  |
| 0007028 | cytoplasm organization and biogenesis                         | 5                     | 699        | 14            | 2271        | 0.989        | 4                | 369    | 1         | 330    | 0.444  |
| 0016044 | membrane organization and biogenesis                          | 1                     | 703        | 8             | 2277        | 0.626        | 1                | 372    | 0         | 331    | 0.952  |
| 0051128 | regulation of cell organization and biogenesis                | 4                     | 700        | 7             | 2278        | 0.517        | 3                | 370    | 1         | 330    | 0.702  |
| 0016049 | cell growth                                                   | 0                     | 704        | 9             | 2276        | 0.203        | 0                | 373    | 0         | 331    | -      |
| 0050896 | response to stimulus                                          | 49                    | 655        | 132           | 2153        | 0.289        | 24               | 349    | 25        | 306    | 0.664  |
| 0006950 | response to stress                                            | 13                    | 691        | 46            | 2239        | 0.902        | 6                | 367    | 7         | 324    | 0.828  |
| 0009408 | response to heat                                              | 1                     | 703        | 9             | 2276        | 0.523        | 0                | 373    | 1         | 330    | 0.952  |
| 0006979 | response to oxidative stress                                  | 1                     | 703        | 1             | 2284        | 0.962        | 0                | 373    | 1         | 330    | 0.952  |
| 0051179 | localization                                                  | 86                    | 618        | 343           | 1942        | 0.074        | 47               | 326    | 39        | 292    | 0.829  |
| 0006403 | RNA localization                                              | 6                     | 698        | 26            | 2259        | 0.664        | 2                | 371    | 4         | 327    | 0.577  |
| 0008104 | protein localization                                          | <b>28</b>             | <b>676</b> | <b>167</b>    | <b>2118</b> | <b>0.002</b> | 17               | 356    | 11        | 320    | 0.52   |
| 0051234 | establishment of localization                                 | 82                    | 622        | 321           | 1964        | 0.117        | 45               | 328    | 37        | 294    | 0.804  |
| 0051235 | maintenance of localization                                   | 1                     | 703        | 3             | 2282        | 0.602        | 1                | 372    | 0         | 331    | 0.952  |
| 0050789 | regulation of biological process                              | 81                    | 623        | 322           | 1963        | 0.09         | 39               | 334    | 42        | 289    | 0.419  |
| 0050790 | regulation of enzyme activity                                 | 3                     | 701        | 11            | 2274        | 0.898        | 0                | 373    | 3         | 328    | 0.207  |
| 0040029 | regulation of gene expression, epigenetic                     | 4                     | 700        | 16            | 2269        | 0.911        | 2                | 371    | 2         | 329    | 0.702  |
| 0006306 | DNA methylation                                               | 2                     | 702        | 5             | 2280        | 0.894        | 1                | 372    | 1         | 330    | 0.532  |
| 0045814 | negative regulation of gene expression, epigenetic            | 0                     | 704        | 7             | 2278        | 0.306        | 0                | 373    | 0         | 331    | -      |
| 0006342 | chromatin silencing                                           | 0                     | 704        | 7             | 2278        | 0.306        | 0                | 373    | 0         | 331    | -      |
| 0003674 | molecular_function                                            | <b>381</b>            | <b>323</b> | <b>1351</b>   | <b>934</b>  | <b>0.021</b> | 209              | 164    | 172       | 159    | 0.315  |
| 0016209 | antioxidant activity                                          | 2                     | 702        | 7             | 2278        | 0.765        | 2                | 371    | 0         | 331    | 0.532  |
| 0005488 | binding                                                       | 218                   | 486        | 789           | 1496        | 0.088        | 112              | 261    | 106       | 225    | 0.624  |
| 0005509 | calcium ion binding                                           | 13                    | 691        | 48            | 2237        | 0.791        | 5                | 368    | 8         | 323    | 0.436  |
| 0030246 | carbohydrate binding                                          | 4                     | 700        | 11            | 2274        | 0.984        | 3                | 370    | 1         | 330    | 0.702  |
| 0008289 | lipid binding                                                 | 6                     | 698        | 20            | 2265        | 0.861        | 5                | 368    | 1         | 330    | 0.278  |
| 0003676 | nucleic acid binding                                          | 77                    | 627        | 312           | 1973        | 0.07         | 40               | 333    | 37        | 294    | 0.943  |
| 0003677 | DNA binding                                                   | 42                    | 662        | 152           | 2133        | 0.576        | 21               | 352    | 21        | 310    | 0.81   |
| 0003682 | chromatin binding                                             | 3                     | 701        | 20            | 2265        | 0.344        | 2                | 371    | 1         | 330    | 0.917  |
| 0003700 | transcription factor activity                                 | 19                    | 685        | 67            | 2218        | 0.846        | 10               | 363    | 9         | 322    | 0.84   |
| 0003723 | RNA binding                                                   | 20                    | 684        | 99            | 2186        | 0.097        | 13               | 360    | 7         | 324    | 0.387  |
| 0008135 | translation factor activity, nucleic acid binding             | 5                     | 699        | 30            | 2255        | 0.272        | 1                | 372    | 4         | 327    | 0.301  |
| 0000166 | nucleotide binding                                            | 54                    | 650        | 201           | 2084        | 0.391        | 29               | 344    | 25        | 306    | 0.975  |
| 0005515 | protein binding                                               | 87                    | 617        | 292           | 1993        | 0.819        | 49               | 324    | 38        | 293    | 0.581  |
| 0008134 | transcription factor binding                                  | 6                     | 698        | 25            | 2260        | 0.733        | 2                | 371    | 4         | 327    | 0.577  |
| 0008092 | cytoskeletal protein binding                                  | 22                    | 682        | 66            | 2219        | 0.844        | 14               | 359    | 8         | 323    | 0.424  |
| 0003779 | actin binding                                                 | 12                    | 692        | 41            | 2244        | 0.996        | 7                | 366    | 5         | 326    | 0.934  |
| 0003824 | catalytic activity                                            | 192                   | 512        | 647           | 1638        | 0.624        | 110              | 263    | 82        | 249    | 0.188  |
| 0016787 | hydrolase activity                                            | 79                    | 625        | 293           | 1992        | 0.289        | 41               | 332    | 38        | 293    | 0.932  |
| 0003924 | GTPase activity                                               | 9                     | 695        | 31            | 2254        | 0.976        | 8                | 365    | 1         | 330    | 0.066  |
| 0004518 | nuclease activity                                             | 3                     | 701        | 12            | 2273        | 0.984        | 0                | 373    | 3         | 328    | 0.207  |



Subspecies (*ligustica* relative to *mellifera*)

| GO#     | GO term                                    | Representational bias |            |               |             |              | Directional bias |        |           |        |        |
|---------|--------------------------------------------|-----------------------|------------|---------------|-------------|--------------|------------------|--------|-----------|--------|--------|
|         |                                            | regulated             |            | not regulated |             | $\rho$       | up-reg.          |        | down-reg. |        | $\rho$ |
|         |                                            | term                  | n.term     | term          | n.term      |              | term             | n.term | term      | n.term |        |
| 0008233 | peptidase activity                         | 26                    | 678        | 92            | 2193        | 0.775        | 13               | 360    | 13        | 318    | 0.912  |
| 0004721 | phosphoprotein phosphatase activity        | 4                     | 700        | 26            | 2259        | 0.267        | 2                | 371    | 2         | 329    | 0.702  |
| 0016740 | transferase activity                       | 58                    | 646        | 183           | 2102        | 0.907        | 31               | 342    | 27        | 304    | 0.95   |
| 0016301 | kinase activity                            | 31                    | 673        | 104           | 2181        | 0.951        | 18               | 355    | 13        | 318    | 0.692  |
| 0004672 | protein kinase activity                    | 20                    | 684        | 75            | 2210        | 0.645        | 12               | 361    | 8         | 323    | 0.681  |
| 0030234 | enzyme regulator activity                  | 26                    | 678        | 79            | 2206        | 0.857        | 16               | 357    | 10        | 321    | 0.49   |
| 0003774 | motor activity                             | 6                     | 698        | 22            | 2263        | 0.966        | 5                | 368    | 1         | 330    | 0.278  |
| 0004871 | signal transducer activity                 | 55                    | 649        | 201           | 2084        | 0.46         | 32               | 341    | 23        | 308    | 0.507  |
| 0004872 | receptor activity                          | 23                    | 681        | 86            | 2199        | 0.617        | 14               | 359    | 9         | 322    | 0.577  |
| 0004879 | ligand-dependent nuclear receptor activity | 1                     | 703        | 8             | 2277        | 0.626        | 0                | 373    | 1         | 330    | 0.952  |
| 0004888 | transmembrane receptor activity            | 14                    | 690        | 60            | 2225        | 0.416        | 8                | 365    | 6         | 325    | 0.964  |
| 0004930 | G-protein coupled receptor activity        | 6                     | 698        | 24            | 2261        | 0.807        | 2                | 371    | 4         | 327    | 0.577  |
| 0005057 | receptor signaling protein activity        | 17                    | 687        | 63            | 2222        | 0.72         | 12               | 361    | 5         | 326    | 0.22   |
| 0005102 | receptor binding                           | 16                    | 688        | 53            | 2232        | 0.943        | 7                | 366    | 9         | 322    | 0.62   |
| 0005198 | structural molecule activity               | 44                    | 660        | 118           | 2167        | 0.309        | 28               | 345    | 16        | 315    | 0.191  |
| 0030528 | transcription regulator activity           | 41                    | 663        | 158           | 2127        | 0.353        | 18               | 355    | 23        | 308    | 0.299  |
| 0045182 | translation regulator activity             | 5                     | 699        | 30            | 2255        | 0.272        | 1                | 372    | 4         | 327    | 0.301  |
| 0005215 | transporter activity                       | 51                    | 653        | 202           | 2083        | 0.21         | 26               | 347    | 25        | 306    | 0.879  |
| 0005489 | electron transporter activity              | 3                     | 701        | 26            | 2259        | 0.143        | 3                | 370    | 0         | 331    | 0.291  |
| 0005216 | ion channel activity                       | 10                    | 694        | 42            | 2243        | 0.565        | 6                | 367    | 4         | 327    | 0.898  |
| 0005244 | voltage-gated ion channel activity         | 4                     | 700        | 22            | 2263        | 0.451        | 2                | 371    | 2         | 329    | 0.702  |
| 0005575 | cellular_component                         | <b>257</b>            | <b>447</b> | <b>966</b>    | <b>1319</b> | <b>0.007</b> | 135              | 238    | 122       | 209    | 0.917  |
| 0005623 | cell                                       | <b>236</b>            | <b>468</b> | <b>876</b>    | <b>1409</b> | <b>0.023</b> | 121              | 252    | 115       | 216    | 0.571  |
| 0005622 | intracellular                              | <b>178</b>            | <b>526</b> | <b>679</b>    | <b>1606</b> | <b>0.026</b> | 92               | 281    | 86        | 245    | 0.753  |
| 0005737 | cytoplasm                                  | 92                    | 612        | 366           | 1919        | 0.066        | 49               | 324    | 43        | 288    | 0.956  |
| 0016023 | cytoplasmic vesicle                        | 12                    | 692        | 29            | 2256        | 0.495        | 7                | 366    | 5         | 326    | 0.934  |
| 0005829 | cytosol                                    | 11                    | 693        | 68            | 2217        | 0.056        | 6                | 367    | 5         | 326    | 0.842  |
| 0005783 | endoplasmic reticulum                      | 10                    | 694        | 47            | 2238        | 0.357        | 6                | 367    | 4         | 327    | 0.898  |
| 0005794 | Golgi apparatus                            | 5                     | 699        | 20            | 2265        | 0.854        | 1                | 372    | 4         | 327    | 0.301  |
| 0005815 | microtubule organizing center              | 2                     | 702        | 7             | 2278        | 0.765        | 2                | 371    | 0         | 331    | 0.532  |
| 0005739 | mitochondrion                              | 21                    | 683        | 84            | 2201        | 0.449        | 13               | 360    | 8         | 323    | 0.542  |
| 0005840 | ribosome                                   | 7                     | 697        | 17            | 2268        | 0.682        | 4                | 369    | 3         | 328    | 0.874  |
| 0005773 | vacuole                                    | 2                     | 702        | 12            | 2273        | 0.615        | 2                | 371    | 0         | 331    | 0.532  |
| 0005764 | lysosome                                   | 0                     | 704        | 5             | 2280        | 0.475        | 0                | 373    | 0         | 331    | -      |
| 0005856 | cytoskeleton                               | 23                    | 681        | 62            | 2223        | 0.52         | 16               | 357    | 7         | 324    | 0.159  |
| 0005694 | chromosome                                 | 8                     | 696        | 32            | 2253        | 0.73         | 4                | 369    | 4         | 327    | 0.852  |
| 0000228 | nuclear chromosome                         | 0                     | 704        | 5             | 2280        | 0.475        | 0                | 373    | 0         | 331    | -      |
| 0005634 | nucleus                                    | 73                    | 631        | 299           | 1986        | 0.065        | 37               | 336    | 36        | 295    | 0.771  |
| 0005635 | nuclear membrane                           | 3                     | 701        | 14            | 2271        | 0.773        | 2                | 371    | 1         | 330    | 0.917  |
| 0005730 | nucleolus                                  | 4                     | 700        | 7             | 2278        | 0.517        | 2                | 371    | 2         | 329    | 0.702  |
| 0005654 | nucleoplasm                                | 14                    | 690        | 58            | 2227        | 0.49         | 6                | 367    | 8         | 323    | 0.62   |
| 0005777 | peroxisome                                 | 2                     | 702        | 7             | 2278        | 0.765        | 0                | 373    | 2         | 329    | 0.427  |
| 0005886 | plasma membrane                            | 31                    | 673        | 125           | 2160        | 0.31         | 13               | 360    | 18        | 313    | 0.282  |
| 0005576 | extracellular region                       | 18                    | 686        | 58            | 2227        | 0.913        | 10               | 363    | 8         | 323    | 0.986  |
| 0005578 | extracellular matrix (sensu Metazoa)       | 10                    | 694        | 25            | 2260        | 0.615        | 5                | 368    | 5         | 326    | 0.898  |

## Methoprene (p &lt; 0.01)

| GO#     | GO term                                                                           | Representational bias |            |               |             |              | Directional bias |            |            |            |              |
|---------|-----------------------------------------------------------------------------------|-----------------------|------------|---------------|-------------|--------------|------------------|------------|------------|------------|--------------|
|         |                                                                                   | regulated             |            | not regulated |             | $\rho$       | up-reg.          |            | down-reg.  |            | $\rho$       |
|         |                                                                                   | term                  | n.term     | term          | n.term      |              | term             | n.term     | term       | n.term     |              |
| 0008150 | biological_process                                                                | 365                   | 232        | 1424          | 1001        | 0.303        | <b>208</b>       | <b>153</b> | <b>157</b> | <b>79</b>  | <b>0.036</b> |
| 0007610 | behavior                                                                          | 38                    | 559        | 120           | 2305        | 0.197        | 17               | 344        | 21         | 215        | 0.06         |
| 0030534 | adult behavior                                                                    | 6                     | 591        | 17            | 2408        | 0.615        | 3                | 358        | 3          | 233        | 0.914        |
| 0030537 | larval behavior                                                                   | 3                     | 594        | 6             | 2419        | 0.545        | 2                | 359        | 1          | 235        | 0.71         |
| 0007611 | learning and/or memory                                                            | 7                     | 590        | 17            | 2408        | 0.365        | 3                | 358        | 4          | 232        | 0.569        |
| 0007612 | learning                                                                          | 4                     | 593        | 11            | 2414        | 0.727        | 3                | 358        | 1          | 235        | 0.934        |
| 0007613 | memory                                                                            | 4                     | 593        | 7             | 2418        | 0.314        | 1                | 360        | 3          | 233        | 0.346        |
| 0007626 | locomotory behavior                                                               | 28                    | 569        | 92            | 2333        | 0.375        | 13               | 348        | 15         | 221        | 0.174        |
| 0007635 | chemosensory behavior                                                             | 4                     | 593        | 13            | 2412        | 0.931        | 2                | 359        | 2          | 234        | 0.934        |
| 0007622 | rhythmic behavior                                                                 | 4                     | 593        | 10            | 2415        | 0.621        | 1                | 360        | 3          | 233        | 0.346        |
| 0048512 | circadian behavior                                                                | 4                     | 593        | 9             | 2416        | 0.515        | 1                | 360        | 3          | 233        | 0.346        |
| 0009987 | cellular process                                                                  | 337                   | 260        | 1324          | 1101        | 0.442        | <b>190</b>       | <b>171</b> | <b>147</b> | <b>89</b>  | <b>0.025</b> |
| 0007154 | cell communication                                                                | 101                   | 496        | 386           | 2039        | 0.594        | <b>42</b>        | <b>319</b> | <b>59</b>  | <b>177</b> | <b>3E-05</b> |
| 0007155 | cell adhesion                                                                     | <b>27</b>             | <b>570</b> | <b>58</b>     | <b>2367</b> | <b>0.007</b> | <b>9</b>         | <b>352</b> | <b>18</b>  | <b>218</b> | <b>0.006</b> |
| 0008037 | cell recognition                                                                  | 0                     | 597        | 2             | 2423        | 0.852        | 0                | 361        | 0          | 236        | -            |
| 0008038 | neuronal cell recognition                                                         | 0                     | 597        | 2             | 2423        | 0.852        | 0                | 361        | 0          | 236        | -            |
| 0016337 | cell-cell adhesion                                                                | <b>13</b>             | <b>584</b> | <b>22</b>     | <b>2403</b> | <b>0.017</b> | <b>3</b>         | <b>358</b> | <b>10</b>  | <b>226</b> | <b>0.012</b> |
| 0016339 | calcium-dependent cell-cell adhesion                                              | <b>3</b>              | <b>594</b> | <b>1</b>      | <b>2424</b> | <b>0.032</b> | 1                | 360        | 2          | 234        | 0.71         |
| 0007156 | homophilic cell adhesion                                                          | <b>4</b>              | <b>593</b> | <b>2</b>      | <b>2423</b> | <b>0.018</b> | 1                | 360        | 3          | 233        | 0.346        |
| 0007160 | cell-matrix adhesion                                                              | 4                     | 593        | 5             | 2420        | 0.149        | 1                | 360        | 3          | 233        | 0.346        |
| 0007267 | cell-cell signaling                                                               | 35                    | 562        | 119           | 2306        | 0.397        | <b>14</b>        | <b>347</b> | <b>21</b>  | <b>215</b> | <b>0.018</b> |
| 0019226 | transmission of nerve impulse                                                     | 30                    | 567        | 106           | 2319        | 0.562        | 13               | 348        | 17         | 219        | 0.075        |
| 0007268 | synaptic transmission                                                             | 24                    | 573        | 77            | 2348        | 0.367        | 11               | 350        | 13         | 223        | 0.199        |
| 0007270 | nerve-nerve synaptic transmission                                                 | 3                     | 594        | 13            | 2412        | 0.831        | 0                | 361        | 3          | 233        | 0.12         |
| 0001505 | regulation of neurotransmitter levels                                             | 13                    | 584        | 47            | 2378        | 0.832        | 8                | 353        | 5          | 231        | 0.836        |
| 0042133 | neurotransmitter metabolism                                                       | 2                     | 595        | 6             | 2419        | 0.943        | 1                | 360        | 1          | 235        | 0.674        |
| 0007269 | neurotransmitter secretion                                                        | 11                    | 586        | 42            | 2383        | 0.992        | 7                | 354        | 4          | 232        | 0.925        |
| 0007165 | signal transduction                                                               | 76                    | 521        | 301           | 2124        | 0.887        | <b>29</b>        | <b>332</b> | <b>47</b>  | <b>189</b> | <b>4E-05</b> |
| 0007166 | cell surface receptor linked signal transduction                                  | 31                    | 566        | 125           | 2300        | 0.948        | <b>8</b>         | <b>353</b> | <b>23</b>  | <b>213</b> | <b>1E-04</b> |
| 0007167 | enzyme linked receptor protein signaling pathway                                  | 12                    | 585        | 33            | 2392        | 0.325        | <b>1</b>         | <b>360</b> | <b>11</b>  | <b>225</b> | <b>6E-04</b> |
| 0007178 | transmembrane receptor protein serine/threonine kinase signaling pathway          | 2                     | 595        | 13            | 2412        | 0.763        | 0                | 361        | 2          | 234        | 0.304        |
| 0007179 | transforming growth factor beta receptor signaling pathway                        | 1                     | 596        | 8             | 2417        | 0.816        | 0                | 361        | 1          | 235        | 0.83         |
| 0007169 | transmembrane receptor protein tyrosine kinase signaling pathway                  | 10                    | 587        | 21            | 2404        | 0.126        | <b>1</b>         | <b>360</b> | <b>9</b>   | <b>227</b> | <b>0.003</b> |
| 0007173 | epidermal growth factor receptor signaling pathway                                | 1                     | 596        | 6             | 2419        | 0.911        | 0                | 361        | 1          | 235        | 0.83         |
| 0008286 | insulin receptor signaling pathway                                                | 2                     | 595        | 2             | 2423        | 0.372        | 0                | 361        | 2          | 234        | 0.304        |
| 0008293 | torso signaling pathway                                                           | 2                     | 595        | 5             | 2420        | 0.911        | 1                | 360        | 1          | 235        | 0.674        |
| 0007186 | G-protein coupled receptor protein signaling pathway                              | 11                    | 586        | 60            | 2365        | 0.446        | 5                | 356        | 6          | 230        | 0.473        |
| 0007200 | G-protein signaling, coupled to IP3 second messenger (phospholipase C activating) | 3                     | 594        | 2             | 2423        | 0.089        | 2                | 359        | 1          | 235        | 0.71         |
| 0007219 | Notch signaling pathway                                                           | 2                     | 595        | 11            | 2414        | 0.962        | 1                | 360        | 1          | 235        | 0.674        |
| 0007224 | smoothed signaling pathway                                                        | 2                     | 595        | 4             | 2421        | 0.747        | 1                | 360        | 1          | 235        | 0.674        |
| 0008063 | Toll signaling pathway                                                            | 0                     | 597        | 4             | 2421        | 0.715        | 0                | 361        | 0          | 236        | -            |
| 0016055 | Wnt receptor signaling pathway                                                    | 3                     | 594        | 11            | 2414        | 0.858        | 1                | 360        | 2          | 234        | 0.71         |
| 0007242 | intracellular signaling cascade                                                   | 27                    | 570        | 159           | 2266        | 0.079        | 13               | 348        | 14         | 222        | 0.255        |
| 0007263 | nitric oxide mediated signal transduction                                         | 0                     | 597        | 3             | 2422        | 0.893        | 0                | 361        | 0          | 236        | -            |
| 0007243 | protein kinase cascade                                                            | <b>3</b>              | <b>594</b> | <b>41</b>     | <b>2384</b> | <b>0.048</b> | 1                | 360        | 2          | 234        | 0.71         |
| 0007259 | JAK-STAT cascade                                                                  | 1                     | 596        | 5             | 2420        | 0.747        | 0                | 361        | 1          | 235        | 0.83         |
| 0000165 | MAPKKK cascade                                                                    | 2                     | 595        | 33            | 2392        | 0.059        | 1                | 360        | 1          | 235        | 0.674        |
| 0019932 | second-messenger-mediated signaling                                               | 6                     | 591        | 16            | 2409        | 0.535        | 5                | 356        | 1          | 235        | 0.464        |
| 0019722 | calcium-mediated signaling                                                        | 3                     | 594        | 12            | 2413        | 0.763        | 3                | 358        | 0          | 236        | 0.417        |
| 0048015 | phosphoinositide-mediated signaling                                               | 3                     | 594        | 2             | 2423        | 0.089        | 2                | 359        | 1          | 235        | 0.71         |
| 0007264 | small GTPase mediated signal transduction                                         | 8                     | 589        | 37            | 2388        | 0.883        | 4                | 357        | 4          | 232        | 0.806        |
| 0007265 | Ras protein signal transduction                                                   | 4                     | 593        | 7             | 2418        | 0.314        | 2                | 359        | 2          | 234        | 0.934        |
| 0009966 | regulation of signal transduction                                                 | 5                     | 592        | 27            | 2398        | 0.714        | <b>0</b>         | <b>361</b> | <b>5</b>   | <b>231</b> | <b>0.02</b>  |
| 0007275 | development                                                                       | <b>106</b>            | <b>491</b> | <b>348</b>    | <b>2077</b> | <b>0.043</b> | <b>53</b>        | <b>308</b> | <b>53</b>  | <b>183</b> | <b>0.02</b>  |
| 0007568 | aging                                                                             | 4                     | 593        | 7             | 2418        | 0.314        | 3                | 358        | 1          | 235        | 0.934        |
| 0030154 | cell differentiation                                                              | 27                    | 570        | 86            | 2339        | 0.315        | 14               | 347        | 13         | 223        | 0.462        |
| 0048468 | cell development                                                                  | 17                    | 580        | 53            | 2372        | 0.417        | 11               | 350        | 6          | 230        | 0.912        |
| 0000904 | cellular morphogenesis during differentiation                                     | 3                     | 594        | 15            | 2410        | 0.974        | 3                | 358        | 0          | 236        | 0.417        |
| 0042461 | photoreceptor cell development                                                    | 3                     | 594        | 15            | 2410        | 0.974        | 3                | 358        | 0          | 236        | 0.417        |
| 0042051 | eye photoreceptor development (sensu Endopterygota)                               | 3                     | 594        | 14            | 2411        | 0.931        | 3                | 358        | 0          | 236        | 0.417        |
| 0045165 | cell fate commitment                                                              | 13                    | 584        | 33            | 2392        | 0.203        | 4                | 357        | 9          | 227        | 0.054        |

## Methoprene (p &lt; 0.01)

| GO#     | GO term                                                        | Representational bias |        |               |        |        | Directional bias |        |           |        |        |
|---------|----------------------------------------------------------------|-----------------------|--------|---------------|--------|--------|------------------|--------|-----------|--------|--------|
|         |                                                                | regulated             |        | not regulated |        | $\rho$ | up-reg.          |        | down-reg. |        | $\rho$ |
|         |                                                                | term                  | n.term | term          | n.term |        | term             | n.term | term      | n.term |        |
| 0001709 | cell fate determination                                        | 7                     | 590    | 21            | 2404   | 0.644  | 3                | 358    | 4         | 232    | 0.569  |
| 0007400 | neuroblast cell fate determination                             | 3                     | 594    | 5             | 2420   | 0.414  | 1                | 360    | 2         | 234    | 0.71   |
| 0001708 | cell fate specification                                        | 2                     | 595    | 5             | 2420   | 0.911  | 1                | 360    | 1         | 235    | 0.674  |
| 0007349 | cellularization                                                | 3                     | 594    | 7             | 2418   | 0.676  | 2                | 359    | 1         | 235    | 0.71   |
| 0040007 | growth                                                         | 10                    | 587    | 26            | 2399   | 0.315  | 2                | 359    | 8         | 228    | 0.021  |
| 0002164 | larval development                                             | 6                     | 591    | 11            | 2414   | 0.191  | 1                | 360    | 5         | 231    | 0.074  |
| 0002165 | larval or pupal development (sensu Insecta)                    | 24                    | 573    | 101           | 2324   | 0.965  | 11               | 350    | 13        | 223    | 0.199  |
| 0007552 | metamorphosis                                                  | 22                    | 575    | 95            | 2330   | 0.884  | 10               | 351    | 12        | 224    | 0.213  |
| 0009653 | morphogenesis                                                  | 73                    | 524    | 243           | 2182   | 0.133  | 31               | 330    | 42        | 194    | 0.001  |
| 0002009 | morphogenesis of an epithelium                                 | 9                     | 588    | 31            | 2394   | 0.811  | 3                | 358    | 6         | 230    | 0.182  |
| 0009887 | organogenesis                                                  | 63                    | 534    | 219           | 2206   | 0.286  | 26               | 335    | 37        | 199    | 0.002  |
| 0001654 | eye morphogenesis                                              | 12                    | 585    | 43            | 2382   | 0.828  | 6                | 355    | 6         | 230    | 0.652  |
| 0008406 | gonad development                                              | 5                     | 592    | 5             | 2420   | 0.045  | 2                | 359    | 3         | 233    | 0.631  |
| 0007444 | imaginal disc development                                      | 19                    | 578    | 72            | 2353   | 0.889  | 7                | 354    | 12        | 224    | 0.057  |
| 0007494 | midgut development                                             | 2                     | 595    | 2             | 2423   | 0.372  | 0                | 361    | 2         | 234    | 0.304  |
| 0007517 | muscle development                                             | 3                     | 594    | 30            | 2395   | 0.184  | 2                | 359    | 1         | 235    | 0.71   |
| 0007399 | neurogenesis                                                   | 35                    | 562    | 130           | 2295   | 0.702  | 15               | 346    | 20        | 216    | 0.044  |
| 0007409 | axonogenesis                                                   | 7                     | 590    | 40            | 2385   | 0.51   | 3                | 358    | 4         | 232    | 0.569  |
| 0007411 | axon guidance                                                  | 6                     | 591    | 29            | 2396   | 0.86   | 3                | 358    | 3         | 233    | 0.914  |
| 0007417 | central nervous system development                             | 8                     | 589    | 31            | 2394   | 0.934  | 5                | 356    | 3         | 233    | 0.806  |
| 0016358 | dendrite morphogenesis                                         | 1                     | 596    | 13            | 2412   | 0.394  | 1                | 360    | 0         | 236    | 0.83   |
| 0042063 | gliogenesis                                                    | 0                     | 597    | 11            | 2414   | 0.204  | 0                | 361    | 0         | 236    | -      |
| 0007422 | peripheral nervous system development                          | 8                     | 589    | 32            | 2393   | 0.872  | 3                | 358    | 5         | 231    | 0.33   |
| 0050767 | regulation of neurogenesis                                     | 1                     | 596    | 5             | 2420   | 0.747  | 1                | 360    | 0         | 236    | 0.83   |
| 0007424 | tracheal system development (sensu Insecta)                    | 5                     | 592    | 30            | 2395   | 0.546  | 2                | 359    | 3         | 233    | 0.631  |
| 0048513 | organ development                                              | 64                    | 533    | 222           | 2203   | 0.275  | 27               | 334    | 37        | 199    | 0.002  |
| 0007389 | pattern specification                                          | 19                    | 578    | 53            | 2372   | 0.2    | 12               | 349    | 7         | 229    | 0.996  |
| 0048066 | pigmentation                                                   | 3                     | 594    | 7             | 2418   | 0.676  | 2                | 359    | 1         | 235    | 0.71   |
| 0009791 | post-embryonic development                                     | 6                     | 591    | 11            | 2414   | 0.191  | 1                | 360    | 5         | 231    | 0.074  |
| 0009790 | embryonic development                                          | 25                    | 572    | 74            | 2351   | 0.205  | 13               | 348    | 12        | 224    | 0.499  |
| 0007530 | sex determination                                              | 2                     | 595    | 8             | 2417   | 0.705  | 1                | 360    | 1         | 235    | 0.674  |
| 0007548 | sex differentiation                                            | 8                     | 589    | 10            | 2415   | 0.019  | 4                | 357    | 4         | 232    | 0.806  |
| 0019827 | stem cell maintenance                                          | 2                     | 595    | 6             | 2419   | 0.943  | 0                | 361    | 2         | 234    | 0.304  |
| 0000003 | reproduction                                                   | 30                    | 567    | 104           | 2321   | 0.502  | 13               | 348    | 17        | 219    | 0.075  |
| 0050793 | regulation of development                                      | 8                     | 589    | 35            | 2390   | 0.998  | 3                | 358    | 5         | 231    | 0.33   |
| 0007582 | physiological process                                          | 334                   | 263    | 1305          | 1120   | 0.373  | 193              | 168    | 141       | 95     | 0.153  |
| 0008152 | metabolism                                                     | 251                   | 346    | 951           | 1474   | 0.223  | 148              | 213    | 103       | 133    | 0.578  |
| 0009056 | catabolism                                                     | 46                    | 551    | 157           | 2268   | 0.325  | 31               | 330    | 15        | 221    | 0.399  |
| 0006091 | energy pathways                                                | 41                    | 556    | 67            | 2358   | 2E-06  | 34               | 327    | 7         | 229    | 0.004  |
| 0006118 | electron transport                                             | 20                    | 577    | 36            | 2389   | 0.004  | 17               | 344    | 3         | 233    | 0.04   |
| 0006139 | nucleobase, nucleoside, nucleotide and nucleic acid metabolism | 75                    | 522    | 359           | 2066   | 0.182  | 45               | 316    | 30        | 206    | 0.97   |
| 0006259 | DNA metabolism                                                 | 13                    | 584    | 67            | 2358   | 0.512  | 5                | 356    | 8         | 228    | 0.176  |
| 0006350 | transcription                                                  | 36                    | 561    | 189           | 2236   | 0.167  | 20               | 341    | 16        | 220    | 0.655  |
| 0043170 | macromolecule metabolism                                       | 125                   | 472    | 536           | 1889   | 0.574  | 63               | 298    | 62        | 174    | 0.013  |
| 0019538 | protein metabolism                                             | 95                    | 502    | 463           | 1962   | 0.083  | 44               | 317    | 51        | 185    | 0.003  |
| 0006412 | protein biosynthesis                                           | 22                    | 575    | 121           | 2304   | 0.216  | 7                | 354    | 15        | 221    | 0.01   |
| 0006464 | protein modification                                           | 41                    | 556    | 216           | 2209   | 0.129  | 15               | 346    | 26        | 210    | 0.002  |
| 0006457 | protein folding                                                | 13                    | 584    | 31            | 2394   | 0.146  | 5                | 356    | 8         | 228    | 0.176  |
| 0005975 | carbohydrate metabolism                                        | 32                    | 565    | 76            | 2349   | 0.012  | 19               | 342    | 13        | 223    | 0.956  |
| 0006519 | amino acid and derivative metabolism                           | 16                    | 581    | 55            | 2370   | 0.657  | 9                | 352    | 7         | 229    | 0.928  |
| 0006629 | lipid metabolism                                               | 28                    | 569    | 65            | 2360   | 0.016  | 21               | 340    | 7         | 229    | 0.158  |
| 0009308 | amine metabolism                                               | 17                    | 580    | 64            | 2361   | 0.888  | 9                | 352    | 8         | 228    | 0.695  |
| 0042440 | pigment metabolism                                             | 4                     | 593    | 8             | 2417   | 0.412  | 4                | 357    | 0         | 236    | 0.267  |
| 0042445 | hormone metabolism                                             | 2                     | 595    | 5             | 2420   | 0.911  | 1                | 360    | 1         | 235    | 0.674  |
| 0009058 | biosynthesis                                                   | 48                    | 549    | 194           | 2231   | 0.959  | 29               | 332    | 19        | 217    | 0.884  |
| 0019748 | secondary metabolism                                           | 4                     | 593    | 10            | 2415   | 0.621  | 4                | 357    | 0         | 236    | 0.267  |
| 0019222 | regulation of metabolism                                       | 40                    | 557    | 194           | 2231   | 0.328  | 22               | 339    | 18        | 218    | 0.572  |
| 0016265 | death                                                          | 23                    | 574    | 65            | 2360   | 0.165  | 9                | 352    | 14        | 222    | 0.055  |
| 0008219 | cell death                                                     | 19                    | 578    | 57            | 2368   | 0.309  | 6                | 355    | 13        | 223    | 0.017  |
| 0016271 | tissue death                                                   | 5                     | 592    | 22            | 2403   | 0.936  | 3                | 358    | 2         | 234    | 0.662  |
| 0042592 | homeostasis                                                    | 7                     | 590    | 22            | 2403   | 0.718  | 5                | 356    | 2         | 234    | 0.835  |
| 0019725 | cell homeostasis                                               | 7                     | 590    | 19            | 2406   | 0.5    | 5                | 356    | 2         | 234    | 0.835  |
| 0050801 | ion homeostasis                                                | 4                     | 593    | 9             | 2416   | 0.515  | 3                | 358    | 1         | 235    | 0.934  |
| 0043062 | extracellular structure organization and biogenesis            | 1                     | 596    | 18            | 2407   | 0.193  | 1                | 360    | 0         | 236    | 0.83   |
| 0046903 | secretion                                                      | 18                    | 579    | 84            | 2341   | 0.676  | 11               | 350    | 7         | 229    | 0.851  |
| 0048511 | rhythmic process                                               | 4                     | 593    | 12            | 2413   | 0.831  | 1                | 360    | 3         | 233    | 0.346  |

## Methoprene (p &lt; 0.01)

| GO#     | GO term                                                       | Representational bias |            |               |             |              | Directional bias |            |           |            |              |
|---------|---------------------------------------------------------------|-----------------------|------------|---------------|-------------|--------------|------------------|------------|-----------|------------|--------------|
|         |                                                               | regulated             |            | not regulated |             | $\rho$       | up-reg.          |            | down-reg. |            | $\rho$       |
|         |                                                               | term                  | n.term     | term          | n.term      |              | term             | n.term     | term      | n.term     |              |
| 0050791 | regulation of physiological process                           | 69                    | 528        | 278           | 2147        | 0.994        | 35               | 326        | 34        | 202        | 0.103        |
| 0050874 | organismal physiological process                              | <b>57</b>             | <b>540</b> | <b>171</b>    | <b>2254</b> | <b>0.047</b> | 30               | 331        | 27        | 209        | 0.258        |
| 0050875 | cellular physiological process                                | 311                   | 286        | 1242          | 1183        | 0.735        | 178              | 183        | 133       | 103        | 0.109        |
| 0006810 | transport                                                     | 86                    | 511        | 315           | 2110        | 0.398        | 48               | 313        | 38        | 198        | 0.404        |
| 0006811 | ion transport                                                 | <b>37</b>             | <b>560</b> | <b>83</b>     | <b>2342</b> | <b>0.003</b> | 23               | 338        | 14        | 222        | 0.965        |
| 0006818 | hydrogen transport                                            | <b>12</b>             | <b>585</b> | <b>7</b>      | <b>2418</b> | <b>8E-06</b> | 11               | 350        | 1         | 235        | 0.053        |
| 0006836 | neurotransmitter transport                                    | 0                     | 597        | 6             | 2419        | 0.482        | 0                | 361        | 0         | 236        | -            |
| 0006858 | extracellular transport                                       | <b>8</b>              | <b>589</b> | <b>7</b>      | <b>2418</b> | <b>0.003</b> | 3                | 358        | 5         | 231        | 0.33         |
| 0006869 | lipid transport                                               | 6                     | 591        | 11            | 2414        | 0.191        | 4                | 357        | 2         | 234        | 0.914        |
| 0008643 | carbohydrate transport                                        | <b>8</b>              | <b>589</b> | <b>7</b>      | <b>2418</b> | <b>0.003</b> | 3                | 358        | 5         | 231        | 0.33         |
| 0015031 | protein transport                                             | <b>23</b>             | <b>574</b> | <b>156</b>    | <b>2269</b> | <b>0.022</b> | 12               | 349        | 11        | 225        | 0.54         |
| 0015837 | amine transport                                               | 4                     | 593        | 9             | 2416        | 0.515        | 2                | 359        | 2         | 234        | 0.934        |
| 0015931 | nucleobase, nucleoside, nucleotide and nucleic acid transport | 5                     | 592        | 9             | 2416        | 0.243        | 3                | 358        | 2         | 234        | 0.662        |
| 0016192 | vesicle-mediated transport                                    | 22                    | 575        | 98            | 2327        | 0.778        | 15               | 346        | 7         | 229        | 0.595        |
| 0045045 | secretory pathway                                             | 17                    | 580        | 79            | 2346        | 0.703        | 11               | 350        | 6         | 230        | 0.912        |
| 0046907 | intracellular transport                                       | <b>24</b>             | <b>573</b> | <b>175</b>    | <b>2250</b> | <b>0.006</b> | 13               | 348        | 11        | 225        | 0.666        |
| 0051049 | regulation of transport                                       | 5                     | 592        | 13            | 2412        | 0.575        | 2                | 359        | 3         | 233        | 0.631        |
| 0008283 | cell proliferation                                            | <b>22</b>             | <b>575</b> | <b>50</b>     | <b>2375</b> | <b>0.029</b> | 11               | 350        | 11        | 225        | 0.423        |
| 0007049 | cell cycle                                                    | 27                    | 570        | 104           | 2321        | 0.889        | 15               | 346        | 12        | 224        | 0.739        |
| 0017145 | stem cell division                                            | 4                     | 593        | 8             | 2417        | 0.412        | 1                | 360        | 3         | 233        | 0.346        |
| 0016043 | cell organization and biogenesis                              | 57                    | 540        | 217           | 2208        | 0.706        | 28               | 333        | 29        | 207        | 0.089        |
| 0000902 | cellular morphogenesis                                        | 18                    | 579        | 56            | 2369        | 0.394        | 8                | 353        | 10        | 226        | 0.243        |
| 0006996 | organelle organization and biogenesis                         | 46                    | 551        | 192           | 2233        | 0.93         | <b>21</b>        | <b>340</b> | <b>25</b> | <b>211</b> | <b>0.047</b> |
| 0007010 | cytoskeleton organization and biogenesis                      | 37                    | 560        | 129           | 2296        | 0.457        | <b>16</b>        | <b>345</b> | <b>21</b> | <b>215</b> | <b>0.041</b> |
| 0006997 | nuclear organization and biogenesis                           | 1                     | 596        | 8             | 2417        | 0.816        | 1                | 360        | 0         | 236        | 0.83         |
| 0007028 | cytoplasm organization and biogenesis                         | 4                     | 593        | 13            | 2412        | 0.931        | 2                | 359        | 2         | 234        | 0.934        |
| 0016044 | membrane organization and biogenesis                          | 4                     | 593        | 4             | 2421        | 0.088        | 3                | 358        | 1         | 235        | 0.934        |
| 0051128 | regulation of cell organization and biogenesis                | 1                     | 596        | 11            | 2414        | 0.527        | 1                | 360        | 0         | 236        | 0.83         |
| 0016049 | cell growth                                                   | <b>5</b>              | <b>592</b> | <b>4</b>      | <b>2421</b> | <b>0.022</b> | 1                | 360        | 4         | 232        | 0.162        |
| 0050896 | response to stimulus                                          | 45                    | 552        | 131           | 2294        | 0.058        | <b>20</b>        | <b>341</b> | <b>25</b> | <b>211</b> | <b>0.033</b> |
| 0006950 | response to stress                                            | <b>18</b>             | <b>579</b> | <b>40</b>     | <b>2385</b> | <b>0.044</b> | <b>4</b>         | <b>357</b> | <b>14</b> | <b>222</b> | <b>0.002</b> |
| 0009408 | response to heat                                              | <b>6</b>              | <b>591</b> | <b>5</b>      | <b>2420</b> | <b>0.012</b> | 1                | 360        | 5         | 231        | 0.074        |
| 0006979 | response to oxidative stress                                  | 1                     | 596        | 1             | 2424        | 0.852        | 0                | 361        | 1         | 235        | 0.83         |
| 0051179 | localization                                                  | 93                    | 504        | 336           | 2089        | 0.31         | 51               | 310        | 42        | 194        | 0.274        |
| 0006403 | RNA localization                                              | 6                     | 591        | 23            | 2402        | 0.915        | 3                | 358        | 3         | 233        | 0.914        |
| 0008104 | protein localization                                          | <b>26</b>             | <b>571</b> | <b>166</b>    | <b>2259</b> | <b>0.032</b> | 13               | 348        | 13        | 223        | 0.362        |
| 0051234 | establishment of localization                                 | 87                    | 510        | 319           | 2106        | 0.399        | 48               | 313        | 39        | 197        | 0.33         |
| 0051235 | maintenance of localization                                   | 2                     | 595        | 1             | 2424        | 0.188        | 2                | 359        | 0         | 236        | 0.674        |
| 0050789 | regulation of biological process                              | 77                    | 520        | 325           | 2100        | 0.797        | <b>38</b>        | <b>323</b> | <b>39</b> | <b>197</b> | <b>0.044</b> |
| 0050790 | regulation of enzyme activity                                 | 2                     | 595        | 13            | 2412        | 0.763        | 1                | 360        | 1         | 235        | 0.674        |
| 0040029 | regulation of gene expression, epigenetic                     | 5                     | 592        | 15            | 2410        | 0.757        | 3                | 358        | 2         | 234        | 0.662        |
| 0006306 | DNA methylation                                               | 2                     | 595        | 5             | 2420        | 0.911        | 1                | 360        | 1         | 235        | 0.674        |
| 0045814 | negative regulation of gene expression, epigenetic            | 0                     | 597        | 7             | 2418        | 0.401        | 0                | 361        | 0         | 236        | -            |
| 0006342 | chromatin silencing                                           | 0                     | 597        | 7             | 2418        | 0.401        | 0                | 361        | 0         | 236        | -            |
| 0003674 | molecular_function                                            | 356                   | 241        | 1408          | 1017        | 0.515        | 204              | 157        | 152       | 84         | 0.066        |
| 0016209 | antioxidant activity                                          | 1                     | 596        | 7             | 2418        | 0.943        | 1                | 360        | 0         | 236        | 0.83         |
| 0005488 | binding                                                       | 195                   | 402        | 847           | 1578        | 0.32         | <b>102</b>       | <b>259</b> | <b>93</b> | <b>143</b> | <b>0.006</b> |
| 0005509 | calcium ion binding                                           | 14                    | 583        | 44            | 2381        | 0.497        | 8                | 353        | 6         | 230        | 0.985        |
| 0030246 | carbohydrate binding                                          | 2                     | 595        | 12            | 2413        | 0.858        | 1                | 360        | 1         | 235        | 0.674        |
| 0008289 | lipid binding                                                 | 5                     | 592        | 21            | 2404        | 0.857        | 3                | 358        | 2         | 234        | 0.662        |
| 0003676 | nucleic acid binding                                          | <b>58</b>             | <b>539</b> | <b>366</b>    | <b>2059</b> | <b>9E-04</b> | <b>27</b>        | <b>334</b> | <b>31</b> | <b>205</b> | <b>0.032</b> |
| 0003677 | DNA binding                                                   | 32                    | 565        | 163           | 2262        | 0.263        | 18               | 343        | 14        | 222        | 0.752        |
| 0003682 | chromatin binding                                             | 4                     | 593        | 20            | 2405        | 0.901        | 2                | 359        | 2         | 234        | 0.934        |
| 0003700 | transcription factor activity                                 | 11                    | 586        | 76            | 2349        | 0.12         | 7                | 354        | 4         | 232        | 0.925        |
| 0003723 | RNA binding                                                   | <b>15</b>             | <b>582</b> | <b>108</b>    | <b>2317</b> | <b>0.042</b> | 5                | 356        | 10        | 226        | 0.056        |
| 0008135 | translation factor activity, nucleic acid binding             | 5                     | 592        | 29            | 2396        | 0.598        | 2                | 359        | 3         | 233        | 0.631        |
| 0000166 | nucleotide binding                                            | 53                    | 544        | 203           | 2222        | 0.752        | 25               | 336        | 28        | 208        | 0.054        |
| 0005515 | protein binding                                               | 79                    | 518        | 303           | 2122        | 0.676        | <b>38</b>        | <b>323</b> | <b>41</b> | <b>195</b> | <b>0.022</b> |
| 0008134 | transcription factor binding                                  | 5                     | 592        | 24            | 2401        | 0.915        | 2                | 359        | 3         | 233        | 0.631        |
| 0008092 | cytoskeletal protein binding                                  | 25                    | 572        | 64            | 2361        | 0.062        | 12               | 349        | 13        | 223        | 0.274        |
| 0003779 | actin binding                                                 | 16                    | 581        | 38            | 2387        | 0.096        | 10               | 351        | 6         | 230        | 0.928        |
| 0003824 | catalytic activity                                            | <b>190</b>            | <b>407</b> | <b>650</b>    | <b>1775</b> | <b>0.016</b> | 120              | 241        | 70        | 166        | 0.408        |
| 0016787 | hydrolase activity                                            | <b>83</b>             | <b>514</b> | <b>277</b>    | <b>2148</b> | <b>0.108</b> | 56               | 305        | 27        | 209        | 0.199        |
| 0003924 | GTPase activity                                               | 5                     | 592        | 31            | 2394        | 0.497        | 2                | 359        | 3         | 233        | 0.631        |
| 0004518 | nuclease activity                                             | 1                     | 596        | 13            | 2412        | 0.394        | 1                | 360        | 0         | 236        | 0.83         |

## Methoprene (p &lt; 0.01)

| GO#     | GO term                                    | Representational bias |            |               |             |              | Directional bias |            |            |            |              |
|---------|--------------------------------------------|-----------------------|------------|---------------|-------------|--------------|------------------|------------|------------|------------|--------------|
|         |                                            | regulated             |            | not regulated |             | $\rho$       | up-reg.          |            | down-reg.  |            | $\rho$       |
|         |                                            | term                  | n.term     | term          | n.term      |              | term             | n.term     | term       | n.term     |              |
| 0008233 | peptidase activity                         | 23                    | 574        | 90            | 2335        | 0.966        | 17               | 344        | 6          | 230        | 0.26         |
| 0004721 | phosphoprotein phosphatase activity        | 4                     | 593        | 25            | 2400        | 0.565        | 3                | 358        | 1          | 235        | 0.934        |
| 0016740 | transferase activity                       | 51                    | 546        | 196           | 2229        | 0.776        | 27               | 334        | 24         | 212        | 0.317        |
| 0016301 | kinase activity                            | 27                    | 570        | 113           | 2312        | 0.973        | 14               | 347        | 13         | 223        | 0.462        |
| 0004672 | protein kinase activity                    | 18                    | 579        | 78            | 2347        | 0.904        | 8                | 353        | 10         | 226        | 0.243        |
| 0030234 | enzyme regulator activity                  | 20                    | 577        | 91            | 2334        | 0.729        | 11               | 350        | 9          | 227        | 0.782        |
| 0003774 | motor activity                             | 5                     | 592        | 22            | 2403        | 0.936        | 4                | 357        | 1          | 235        | 0.662        |
| 0004871 | signal transducer activity                 | 46                    | 551        | 205           | 2220        | 0.609        | <b>17</b>        | <b>344</b> | <b>29</b>  | <b>207</b> | <b>0.001</b> |
| 0004872 | receptor activity                          | 20                    | 577        | 84            | 2341        | 0.991        | <b>4</b>         | <b>357</b> | <b>16</b>  | <b>220</b> | <b>4E-04</b> |
| 0004879 | ligand-dependent nuclear receptor activity | 2                     | 595        | 7             | 2418        | 0.816        | 1                | 360        | 1          | 235        | 0.674        |
| 0004888 | transmembrane receptor activity            | 12                    | 585        | 59            | 2366        | 0.645        | <b>2</b>         | <b>359</b> | <b>10</b>  | <b>226</b> | <b>0.005</b> |
| 0004930 | G-protein coupled receptor activity        | 4                     | 593        | 25            | 2400        | 0.565        | 2                | 359        | 2          | 234        | 0.934        |
| 0005057 | receptor signaling protein activity        | 14                    | 583        | 68            | 2357        | 0.633        | 9                | 352        | 5          | 231        | 0.985        |
| 0005102 | receptor binding                           | 13                    | 584        | 54            | 2371        | 0.935        | 6                | 355        | 7          | 229        | 0.435        |
| 0005198 | structural molecule activity               | 37                    | 560        | 157           | 2268        | 0.878        | 17               | 344        | 20         | 216        | 0.091        |
| 0030528 | transcription regulator activity           | <b>28</b>             | <b>569</b> | <b>170</b>    | <b>2255</b> | <b>0.05</b>  | 17               | 344        | 11         | 225        | 0.864        |
| 0045182 | translation regulator activity             | 5                     | 592        | 29            | 2396        | 0.598        | 2                | 359        | 3          | 233        | 0.631        |
| 0005215 | transporter activity                       | <b>75</b>             | <b>522</b> | <b>176</b>    | <b>2249</b> | <b>4E-05</b> | 48               | 313        | 27         | 209        | 0.587        |
| 0005489 | electron transporter activity              | <b>11</b>             | <b>586</b> | <b>18</b>     | <b>2407</b> | <b>0.025</b> | 9                | 352        | 2          | 234        | 0.25         |
| 0005216 | ion channel activity                       | 10                    | 587        | 41            | 2384        | 0.88         | <b>2</b>         | <b>359</b> | <b>8</b>   | <b>228</b> | <b>0.021</b> |
| 0005244 | voltage-gated ion channel activity         | 5                     | 592        | 21            | 2404        | 0.857        | 1                | 360        | 4          | 232        | 0.162        |
| 0005575 | cellular_component                         | 251                   | 346        | 998           | 1427        | 0.727        | <b>137</b>       | <b>224</b> | <b>114</b> | <b>122</b> | <b>0.015</b> |
| 0005623 | cell                                       | 225                   | 372        | 918           | 1507        | 0.977        | 126              | 235        | 99         | 137        | 0.099        |
| 0005622 | intracellular                              | 173                   | 424        | 722           | 1703        | 0.741        | 103              | 258        | 70         | 166        | 0.838        |
| 0005737 | cytoplasm                                  | <b>121</b>            | <b>476</b> | <b>371</b>    | <b>2054</b> | <b>0.004</b> | 76               | 285        | 45         | 191        | 0.627        |
| 0016023 | cytoplasmic vesicle                        | 9                     | 588        | 34            | 2391        | 0.998        | 6                | 355        | 3          | 233        | 0.968        |
| 0005829 | cytosol                                    | 21                    | 576        | 91            | 2334        | 0.88         | 13               | 348        | 8          | 228        | 0.928        |
| 0005783 | endoplasmic reticulum                      | <b>18</b>             | <b>579</b> | <b>39</b>     | <b>2386</b> | <b>0.036</b> | 12               | 349        | 6          | 230        | 0.763        |
| 0005794 | Golgi apparatus                            | 9                     | 588        | 17            | 2408        | 0.096        | 5                | 356        | 4          | 232        | 0.968        |
| 0005815 | microtubule organizing center              | 4                     | 593        | 5             | 2420        | 0.149        | <b>0</b>         | <b>361</b> | <b>4</b>   | <b>232</b> | <b>0.049</b> |
| 0005739 | mitochondrion                              | 29                    | 568        | 80            | 2345        | 0.088        | 20               | 341        | 9          | 227        | 0.444        |
| 0005840 | ribosome                                   | 5                     | 592        | 52            | 2373        | 0.053        | 2                | 359        | 3          | 233        | 0.631        |
| 0005773 | vacuole                                    | <b>9</b>              | <b>588</b> | <b>7</b>      | <b>2418</b> | <b>8E-04</b> | 8                | 353        | 1          | 235        | 0.157        |
| 0005764 | lysosome                                   | 1                     | 596        | 5             | 2420        | 0.747        | 0                | 361        | 1          | 235        | 0.83         |
| 0005856 | cytoskeleton                               | 21                    | 576        | 63            | 2362        | 0.278        | 8                | 353        | 13         | 223        | 0.056        |
| 0005694 | chromosome                                 | 8                     | 589        | 30            | 2395        | 0.998        | 3                | 358        | 5          | 231        | 0.33         |
| 0000228 | nuclear chromosome                         | 0                     | 597        | 5             | 2420        | 0.583        | 0                | 361        | 0          | 236        | -            |
| 0005634 | nucleus                                    | 63                    | 534        | 313           | 2112        | 0.136        | 37               | 324        | 26         | 210        | 0.871        |
| 0005635 | nuclear membrane                           | 3                     | 594        | 15            | 2410        | 0.974        | 1                | 360        | 2          | 234        | 0.71         |
| 0005730 | nucleolus                                  | 1                     | 596        | 10            | 2415        | 0.61         | 0                | 361        | 1          | 235        | 0.83         |
| 0005654 | nucleoplasm                                | 10                    | 587        | 64            | 2361        | 0.223        | 5                | 356        | 5          | 231        | 0.721        |
| 0005777 | peroxisome                                 | 3                     | 594        | 6             | 2419        | 0.545        | 2                | 359        | 1          | 235        | 0.71         |
| 0005886 | plasma membrane                            | 29                    | 568        | 118           | 2307        | 0.922        | <b>9</b>         | <b>352</b> | <b>20</b>  | <b>216</b> | <b>0.002</b> |
| 0005576 | extracellular region                       | 18                    | 579        | 52            | 2373        | 0.265        | 8                | 353        | 10         | 226        | 0.243        |
| 0005578 | extracellular matrix (sensu Metazoa)       | 9                     | 588        | 26            | 2399        | 0.498        | <b>1</b>         | <b>360</b> | <b>8</b>   | <b>228</b> | <b>0.007</b> |

## Manganese (p &lt; 0.01)

| GO#     | GO term                                                                           | Representational bias |        |               |        |        | Directional bias |            |           |            |              |
|---------|-----------------------------------------------------------------------------------|-----------------------|--------|---------------|--------|--------|------------------|------------|-----------|------------|--------------|
|         |                                                                                   | regulated             |        | not regulated |        | $\rho$ | up-reg.          |            | down-reg. |            | $\rho$       |
|         |                                                                                   | term                  | n.term | term          | n.term |        | term             | n.term     | term      | n.term     |              |
| 0008150 | biological_process                                                                | 534                   | 328    | 1255          | 905    | 0.057  | 210              | 123        | 324       | 205        | 0.644        |
| 0007610 | behavior                                                                          | 55                    | 807    | 103           | 2057   | 0.088  | <b>37</b>        | <b>296</b> | <b>18</b> | <b>511</b> | <b>1E-05</b> |
| 0030534 | adult behavior                                                                    | 5                     | 857    | 18            | 2142   | 0.623  | 4                | 329        | 1         | 528        | 0.149        |
| 0030537 | larval behavior                                                                   | 5                     | 857    | 4             | 2156   | 0.153  | 4                | 329        | 1         | 528        | 0.149        |
| 0007611 | learning and/or memory                                                            | 5                     | 857    | 19            | 2141   | 0.541  | 3                | 330        | 2         | 527        | 0.601        |
| 0007612 | learning                                                                          | 4                     | 858    | 11            | 2149   | 0.899  | 3                | 330        | 1         | 528        | 0.326        |
| 0007613 | memory                                                                            | 2                     | 860    | 9             | 2151   | 0.67   | 1                | 332        | 1         | 528        | 0.692        |
| 0007626 | locomotory behavior                                                               | 43                    | 819    | 77            | 2083   | 0.088  | <b>27</b>        | <b>306</b> | <b>16</b> | <b>513</b> | <b>0.001</b> |
| 0007635 | chemosensory behavior                                                             | 4                     | 858    | 13            | 2147   | 0.851  | 3                | 330        | 1         | 528        | 0.326        |
| 0007622 | rhythmic behavior                                                                 | 5                     | 857    | 9             | 2151   | 0.764  | <b>5</b>         | <b>328</b> | <b>0</b>  | <b>529</b> | <b>0.018</b> |
| 0048512 | circadian behavior                                                                | 4                     | 858    | 9             | 2151   | 0.898  | <b>4</b>         | <b>329</b> | <b>0</b>  | <b>529</b> | <b>0.044</b> |
| 0009987 | cellular process                                                                  | 495                   | 367    | 1166          | 994    | 0.093  | 203              | 130        | 292       | 237        | 0.111        |
| 0007154 | cell communication                                                                | 145                   | 717    | 342           | 1818   | 0.54   | <b>100</b>       | <b>233</b> | <b>45</b> | <b>484</b> | <b>4E-16</b> |
| 0007155 | cell adhesion                                                                     | 25                    | 837    | 60            | 2100   | 0.951  | <b>16</b>        | <b>317</b> | <b>9</b>  | <b>520</b> | <b>0.015</b> |
| 0008037 | cell recognition                                                                  | 2                     | 860    | 0             | 2160   | 0.145  | 2                | 331        | 0         | 529        | 0.29         |
| 0008038 | neuronal cell recognition                                                         | 2                     | 860    | 0             | 2160   | 0.145  | 2                | 331        | 0         | 529        | 0.29         |
| 0016337 | cell-cell adhesion                                                                | 9                     | 853    | 26            | 2134   | 0.856  | 5                | 328        | 4         | 525        | 0.481        |
| 0016339 | calcium-dependent cell-cell adhesion                                              | 1                     | 861    | 3             | 2157   | 0.691  | 0                | 333        | 1         | 528        | 0.815        |
| 0007156 | homophilic cell adhesion                                                          | 3                     | 859    | 3             | 2157   | 0.475  | 2                | 331        | 1         | 528        | 0.685        |
| 0007160 | cell-matrix adhesion                                                              | 3                     | 859    | 6             | 2154   | 0.96   | 2                | 331        | 1         | 528        | 0.685        |
| 0007267 | cell-cell signaling                                                               | 54                    | 808    | 100           | 2060   | 0.079  | <b>42</b>        | <b>291</b> | <b>12</b> | <b>517</b> | <b>3E-09</b> |
| 0019226 | transmission of nerve impulse                                                     | 46                    | 816    | 90            | 2070   | 0.192  | <b>35</b>        | <b>298</b> | <b>11</b> | <b>518</b> | <b>2E-07</b> |
| 0007268 | synaptic transmission                                                             | 34                    | 828    | 67            | 2093   | 0.293  | <b>27</b>        | <b>306</b> | <b>7</b>  | <b>522</b> | <b>2E-06</b> |
| 0007270 | nerve-nerve synaptic transmission                                                 | 3                     | 859    | 13            | 2147   | 0.555  | 3                | 330        | 0         | 529        | 0.111        |
| 0001505 | regulation of neurotransmitter levels                                             | 22                    | 840    | 38            | 2122   | 0.205  | <b>17</b>        | <b>316</b> | <b>5</b>  | <b>524</b> | <b>4E-04</b> |
| 0042133 | neurotransmitter metabolism                                                       | 4                     | 858    | 4             | 2156   | 0.34   | <b>4</b>         | <b>329</b> | <b>0</b>  | <b>529</b> | <b>0.044</b> |
| 0007269 | neurotransmitter secretion                                                        | 18                    | 844    | 35            | 2125   | 0.465  | <b>13</b>        | <b>320</b> | <b>5</b>  | <b>524</b> | <b>0.007</b> |
| 0007165 | signal transduction                                                               | 105                   | 757    | 272           | 1888   | 0.804  | <b>69</b>        | <b>264</b> | <b>36</b> | <b>493</b> | <b>2E-09</b> |
| 0007166 | cell surface receptor linked signal transduction                                  | 54                    | 808    | 102           | 2058   | 0.101  | <b>36</b>        | <b>297</b> | <b>18</b> | <b>511</b> | <b>2E-05</b> |
| 0007167 | enzyme linked receptor protein signaling pathway                                  | 14                    | 848    | 31            | 2129   | 0.825  | <b>11</b>        | <b>322</b> | <b>3</b>  | <b>526</b> | <b>0.005</b> |
| 0007178 | transmembrane receptor protein serine/threonine kinase signaling pathway          | 4                     | 858    | 11            | 2149   | 0.899  | 3                | 330        | 1         | 528        | 0.326        |
| 0007179 | transforming growth factor beta receptor signaling pathway                        | 3                     | 859    | 6             | 2154   | 0.96   | 3                | 330        | 0         | 529        | 0.111        |
| 0007169 | transmembrane receptor protein tyrosine kinase signaling pathway                  | 11                    | 851    | 20            | 2140   | 0.508  | <b>9</b>         | <b>324</b> | <b>2</b>  | <b>527</b> | <b>0.008</b> |
| 0007173 | epidermal growth factor receptor signaling pathway                                | 3                     | 859    | 4             | 2156   | 0.673  | 2                | 331        | 1         | 528        | 0.685        |
| 0008286 | insulin receptor signaling pathway                                                | 0                     | 862    | 4             | 2156   | 0.478  | 0                | 333        | 0         | 529        | -            |
| 0008293 | torso signaling pathway                                                           | 3                     | 859    | 4             | 2156   | 0.673  | 2                | 331        | 1         | 528        | 0.685        |
| 0007186 | G-protein coupled receptor protein signaling pathway                              | 24                    | 838    | 47            | 2113   | 0.388  | 14               | 319        | 10        | 519        | 0.072        |
| 0007200 | G-protein signaling, coupled to IP3 second messenger (phospholipase C activating) | 2                     | 860    | 3             | 2157   | 0.942  | 2                | 331        | 0         | 529        | 0.29         |
| 0007219 | Notch signaling pathway                                                           | 6                     | 856    | 7             | 2153   | 0.27   | 5                | 328        | 1         | 528        | 0.066        |
| 0007224 | smoothened signaling pathway                                                      | 1                     | 861    | 5             | 2155   | 0.848  | 1                | 332        | 0         | 529        | 0.815        |
| 0008063 | Toll signaling pathway                                                            | 2                     | 860    | 2             | 2158   | 0.691  | 0                | 333        | 2         | 527        | 0.692        |
| 0016055 | Wnt receptor signaling pathway                                                    | 6                     | 856    | 8             | 2152   | 0.371  | <b>6</b>         | <b>327</b> | <b>0</b>  | <b>529</b> | <b>0.007</b> |
| 0007242 | intracellular signaling cascade                                                   | 52                    | 810    | 134           | 2026   | 0.926  | <b>33</b>        | <b>300</b> | <b>19</b> | <b>510</b> | <b>3E-04</b> |
| 0007263 | nitric oxide mediated signal transduction                                         | 0                     | 862    | 3             | 2157   | 0.649  | 0                | 333        | 0         | 529        | -            |
| 0007243 | protein kinase cascade                                                            | 13                    | 849    | 31            | 2129   | 0.986  | 7                | 326        | 6         | 523        | 0.396        |
| 0007259 | JAK-STAT cascade                                                                  | 2                     | 860    | 4             | 2156   | 0.848  | 1                | 332        | 1         | 528        | 0.692        |
| 0000165 | MAPKKK cascade                                                                    | 10                    | 852    | 25            | 2135   | 0.856  | 6                | 327        | 4         | 525        | 0.285        |
| 0019932 | second-messenger-mediated signaling                                               | 4                     | 858    | 18            | 2142   | 0.4    | <b>4</b>         | <b>329</b> | <b>0</b>  | <b>529</b> | <b>0.044</b> |
| 0019722 | calcium-mediated signaling                                                        | 2                     | 860    | 13            | 2147   | 0.308  | 2                | 331        | 0         | 529        | 0.29         |
| 0048015 | phosphoinositide-mediated signaling                                               | 2                     | 860    | 3             | 2157   | 0.942  | 2                | 331        | 0         | 529        | 0.29         |
| 0007264 | small GTPase mediated signal transduction                                         | 9                     | 853    | 36            | 2124   | 0.267  | 3                | 330        | 6         | 523        | 0.987        |
| 0007265 | Ras protein signal transduction                                                   | 0                     | 862    | 11            | 2149   | 0.078  | 0                | 333        | 0         | 529        | -            |
| 0009966 | regulation of signal transduction                                                 | 8                     | 854    | 24            | 2136   | 0.805  | 6                | 327        | 2         | 527        | 0.079        |
| 0007275 | development                                                                       | 133                   | 729    | 321           | 1839   | 0.735  | <b>82</b>        | <b>251</b> | <b>51</b> | <b>478</b> | <b>5E-09</b> |
| 0007568 | aging                                                                             | 2                     | 860    | 9             | 2151   | 0.67   | 0                | 333        | 2         | 527        | 0.692        |
| 0030154 | cell differentiation                                                              | 36                    | 826    | 77            | 2083   | 0.488  | <b>25</b>        | <b>308</b> | <b>11</b> | <b>518</b> | <b>2E-04</b> |
| 0048468 | cell development                                                                  | 20                    | 842    | 50            | 2110   | 0.9    | <b>13</b>        | <b>320</b> | <b>7</b>  | <b>522</b> | <b>0.027</b> |
| 0000904 | cellular morphogenesis during differentiation                                     | 5                     | 857    | 13            | 2147   | 0.848  | 4                | 329        | 1         | 528        | 0.149        |
| 0042461 | photoreceptor cell development                                                    | 5                     | 857    | 13            | 2147   | 0.848  | 4                | 329        | 1         | 528        | 0.149        |
| 0042051 | eye photoreceptor development (sensu Endopterygota)                               | 4                     | 858    | 13            | 2147   | 0.851  | 3                | 330        | 1         | 528        | 0.326        |
| 0045165 | cell fate commitment                                                              | 17                    | 845    | 29            | 2131   | 0.266  | <b>13</b>        | <b>320</b> | <b>4</b>  | <b>525</b> | <b>0.003</b> |

## Manganese (p &lt; 0.01)

| GO#     | GO term                                                        | Representational bias |            |               |             |              | Directional bias |            |            |            |              |
|---------|----------------------------------------------------------------|-----------------------|------------|---------------|-------------|--------------|------------------|------------|------------|------------|--------------|
|         |                                                                | regulated             |            | not regulated |             | $\rho$       | up-reg.          |            | down-reg.  |            | $\rho$       |
|         |                                                                | term                  | n.term     | term          | n.term      |              | term             | n.term     | term       | n.term     |              |
| 0001709 | cell fate determination                                        | 9                     | 853        | 19            | 2141        | 0.829        | <b>7</b>         | <b>326</b> | <b>2</b>   | <b>527</b> | <b>0.037</b> |
| 0007400 | neuroblast cell fate determination                             | 4                     | 858        | 4             | 2156        | 0.34         | 2                | 331        | 2          | 527        | 0.963        |
| 0001708 | cell fate specification                                        | 0                     | 862        | 7             | 2153        | 0.21         | 0                | 333        | 0          | 529        | -            |
| 0007349 | cellularization                                                | 2                     | 860        | 8             | 2152        | 0.805        | 0                | 333        | 2          | 527        | 0.692        |
| 0040007 | growth                                                         | 9                     | 853        | 27            | 2133        | 0.775        | 3                | 330        | 6          | 523        | 0.987        |
| 0002164 | larval development                                             | 4                     | 858        | 13            | 2147        | 0.851        | 1                | 332        | 3          | 526        | 0.963        |
| 0002165 | larval or pupal development (sensu Insecta)                    | 36                    | 826        | 89            | 2071        | 0.975        | <b>24</b>        | <b>309</b> | <b>12</b>  | <b>517</b> | <b>8E-04</b> |
| 0007552 | metamorphosis                                                  | 34                    | 828        | 83            | 2077        | 0.979        | <b>24</b>        | <b>309</b> | <b>10</b>  | <b>519</b> | <b>2E-04</b> |
| 0009653 | morphogenesis                                                  | 93                    | 769        | 223           | 1937        | 0.756        | <b>65</b>        | <b>268</b> | <b>28</b>  | <b>501</b> | <b>1E-10</b> |
| 0002009 | morphogenesis of an epithelium                                 | 8                     | 854        | 32            | 2128        | 0.305        | 2                | 331        | 6          | 523        | 0.667        |
| 0009887 | organogenesis                                                  | 85                    | 777        | 197           | 1963        | 0.574        | <b>62</b>        | <b>271</b> | <b>23</b>  | <b>506</b> | <b>2E-11</b> |
| 0001654 | eye morphogenesis                                              | 17                    | 845        | 38            | 2122        | 0.807        | <b>12</b>        | <b>321</b> | <b>5</b>   | <b>524</b> | <b>0.013</b> |
| 0008406 | gonad development                                              | 5                     | 857        | 5             | 2155        | 0.248        | 4                | 329        | 1          | 528        | 0.149        |
| 0007444 | imaginal disc development                                      | 23                    | 839        | 68            | 2092        | 0.562        | <b>19</b>        | <b>314</b> | <b>4</b>   | <b>525</b> | <b>3E-05</b> |
| 0007494 | midgut development                                             | 0                     | 862        | 4             | 2156        | 0.478        | 0                | 333        | 0          | 529        | -            |
| 0007517 | muscle development                                             | 11                    | 851        | 22            | 2138        | 0.673        | <b>9</b>         | <b>324</b> | <b>2</b>   | <b>527</b> | <b>0.008</b> |
| 0007399 | neurogenesis                                                   | <b>60</b>             | <b>802</b> | <b>105</b>    | <b>2055</b> | <b>0.027</b> | <b>44</b>        | <b>289</b> | <b>16</b>  | <b>513</b> | <b>2E-08</b> |
| 0007409 | axonogenesis                                                   | 19                    | 843        | 28            | 2132        | 0.097        | <b>14</b>        | <b>319</b> | <b>5</b>   | <b>524</b> | <b>0.003</b> |
| 0007411 | axon guidance                                                  | 15                    | 847        | 20            | 2140        | 0.089        | <b>12</b>        | <b>321</b> | <b>3</b>   | <b>526</b> | <b>0.002</b> |
| 0007417 | central nervous system development                             | 13                    | 849        | 26            | 2134        | 0.623        | <b>10</b>        | <b>323</b> | <b>3</b>   | <b>526</b> | <b>0.01</b>  |
| 0016358 | dendrite morphogenesis                                         | 3                     | 859        | 11            | 2149        | 0.77         | 2                | 331        | 1          | 528        | 0.685        |
| 0042063 | gliogenesis                                                    | 3                     | 859        | 8             | 2152        | 0.808        | 2                | 331        | 1          | 528        | 0.685        |
| 0007422 | peripheral nervous system development                          | 12                    | 850        | 28            | 2132        | 0.975        | 7                | 326        | 5          | 524        | 0.266        |
| 0050767 | regulation of neurogenesis                                     | 2                     | 860        | 4             | 2156        | 0.848        | 1                | 332        | 1          | 528        | 0.692        |
| 0007424 | tracheal system development (sensu Insecta)                    | 11                    | 851        | 24            | 2136        | 0.846        | <b>8</b>         | <b>325</b> | <b>3</b>   | <b>526</b> | <b>0.043</b> |
| 0048513 | organ development                                              | 86                    | 776        | 200           | 1960        | 0.589        | <b>62</b>        | <b>271</b> | <b>24</b>  | <b>505</b> | <b>4E-11</b> |
| 0007389 | pattern specification                                          | 19                    | 843        | 53            | 2107        | 0.784        | <b>12</b>        | <b>321</b> | <b>7</b>   | <b>522</b> | <b>0.047</b> |
| 0048066 | pigmentation                                                   | 3                     | 859        | 7             | 2153        | 0.805        | 2                | 331        | 1          | 528        | 0.685        |
| 0009791 | post-embryonic development                                     | 4                     | 858        | 13            | 2147        | 0.851        | 1                | 332        | 3          | 526        | 0.963        |
| 0009790 | embryonic development                                          | 34                    | 828        | 65            | 2095        | 0.234        | <b>22</b>        | <b>311</b> | <b>12</b>  | <b>517</b> | <b>0.003</b> |
| 0007530 | sex determination                                              | 3                     | 859        | 7             | 2153        | 0.805        | 3                | 330        | 0          | 529        | 0.111        |
| 0007548 | sex differentiation                                            | 7                     | 855        | 11            | 2149        | 0.475        | 5                | 328        | 2          | 527        | 0.162        |
| 0019827 | stem cell maintenance                                          | 2                     | 860        | 6             | 2154        | 0.864        | 2                | 331        | 0          | 529        | 0.29         |
| 0000003 | reproduction                                                   | 36                    | 826        | 98            | 2062        | 0.736        | <b>23</b>        | <b>310</b> | <b>13</b>  | <b>516</b> | <b>0.003</b> |
| 0050793 | regulation of development                                      | 13                    | 849        | 30            | 2130        | 0.936        | 6                | 327        | 7          | 522        | 0.784        |
| 0007582 | physiological process                                          | 492                   | 370        | 1147          | 1013        | 0.052        | 189              | 144        | 303        | 226        | 0.936        |
| 0008152 | metabolism                                                     | 356                   | 506        | 846           | 1314        | 0.298        | <b>117</b>       | <b>216</b> | <b>239</b> | <b>290</b> | <b>0.004</b> |
| 0009056 | catabolism                                                     | 55                    | 807        | 148           | 2012        | 0.699        | 20               | 313        | 35         | 494        | 0.831        |
| 0006091 | energy pathways                                                | 37                    | 825        | 71            | 2089        | 0.217        | <b>3</b>         | <b>330</b> | <b>34</b>  | <b>495</b> | <b>2E-04</b> |
| 0006118 | electron transport                                             | 18                    | 844        | 38            | 2122        | 0.648        | <b>2</b>         | <b>331</b> | <b>16</b>  | <b>513</b> | <b>0.029</b> |
| 0006139 | nucleobase, nucleoside, nucleotide and nucleic acid metabolism | 112                   | 750        | 322           | 1838        | 0.194        | 52               | 281        | 60         | 469        | 0.087        |
| 0006259 | DNA metabolism                                                 | 17                    | 845        | 63            | 2097        | 0.182        | 7                | 326        | 10         | 519        | 0.973        |
| 0006350 | transcription                                                  | 57                    | 805        | 168           | 1992        | 0.305        | <b>38</b>        | <b>295</b> | <b>19</b>  | <b>510</b> | <b>1E-05</b> |
| 0043170 | macromolecule metabolism                                       | 200                   | 662        | 461           | 1699        | 0.286        | <b>55</b>        | <b>278</b> | <b>145</b> | <b>384</b> | <b>3E-04</b> |
| 0019538 | protein metabolism                                             | 156                   | 706        | 402           | 1758        | 0.782        | 49               | 284        | 107        | 422        | 0.05         |
| 0006412 | protein biosynthesis                                           | 51                    | 811        | 92            | 2068        | 0.065        | <b>1</b>         | <b>332</b> | <b>50</b>  | <b>479</b> | <b>7E-08</b> |
| 0006464 | protein modification                                           | <b>59</b>             | <b>803</b> | <b>198</b>    | <b>1962</b> | <b>0.046</b> | 25               | 308        | 34         | 495        | 0.636        |
| 0006457 | protein folding                                                | 15                    | 847        | 29            | 2131        | 0.512        | 6                | 327        | 9          | 520        | 0.875        |
| 0005975 | carbohydrate metabolism                                        | <b>42</b>             | <b>820</b> | <b>66</b>     | <b>2094</b> | <b>0.02</b>  | <b>7</b>         | <b>326</b> | <b>35</b>  | <b>494</b> | <b>0.005</b> |
| 0006519 | amino acid and derivative metabolism                           | <b>30</b>             | <b>832</b> | <b>41</b>     | <b>2119</b> | <b>0.014</b> | 9                | 324        | 21         | 508        | 0.425        |
| 0006629 | lipid metabolism                                               | 30                    | 832        | 63            | 2097        | 0.488        | 7                | 326        | 23         | 506        | 0.119        |
| 0009308 | amine metabolism                                               | <b>33</b>             | <b>829</b> | <b>48</b>     | <b>2112</b> | <b>0.019</b> | 10               | 323        | 23         | 506        | 0.412        |
| 0042440 | pigment metabolism                                             | 4                     | 858        | 8             | 2152        | 0.961        | 1                | 332        | 3          | 526        | 0.963        |
| 0042445 | hormone metabolism                                             | 3                     | 859        | 4             | 2156        | 0.673        | 2                | 331        | 1          | 528        | 0.685        |
| 0009058 | biosynthesis                                                   | <b>86</b>             | <b>776</b> | <b>156</b>    | <b>2004</b> | <b>0.014</b> | <b>9</b>         | <b>324</b> | <b>77</b>  | <b>452</b> | <b>3E-08</b> |
| 0019748 | secondary metabolism                                           | 5                     | 857        | 9             | 2151        | 0.764        | 2                | 331        | 3          | 526        | 0.691        |
| 0019222 | regulation of metabolism                                       | 61                    | 801        | 173           | 1987        | 0.429        | <b>39</b>        | <b>294</b> | <b>22</b>  | <b>507</b> | <b>5E-05</b> |
| 0016265 | death                                                          | 24                    | 838        | 64            | 2096        | 0.885        | 10               | 323        | 14         | 515        | 0.923        |
| 0008219 | cell death                                                     | 21                    | 841        | 55            | 2105        | 0.963        | 9                | 324        | 12         | 517        | 0.86         |
| 0016271 | tissue death                                                   | 6                     | 856        | 21            | 2139        | 0.607        | 3                | 330        | 3          | 526        | 0.878        |
| 0042592 | homeostasis                                                    | 8                     | 854        | 21            | 2139        | 0.925        | 4                | 329        | 4          | 525        | 0.765        |
| 0019725 | cell homeostasis                                               | 7                     | 855        | 19            | 2141        | 0.971        | 3                | 330        | 4          | 525        | 0.874        |
| 0050801 | ion homeostasis                                                | 3                     | 859        | 10            | 2150        | 0.898        | 2                | 331        | 1          | 528        | 0.685        |
| 0043062 | extracellular structure organization and biogenesis            | 8                     | 854        | 11            | 2149        | 0.289        | 5                | 328        | 3          | 526        | 0.304        |
| 0046903 | secretion                                                      | <b>39</b>             | <b>823</b> | <b>63</b>     | <b>2097</b> | <b>0.036</b> | 19               | 314        | 20         | 509        | 0.248        |
| 0048511 | rhythmic process                                               | 6                     | 856        | 10            | 2150        | 0.603        | <b>6</b>         | <b>327</b> | <b>0</b>   | <b>529</b> | <b>0.007</b> |

## Manganese (p &lt; 0.01)

| GO#     | GO term                                                       | Representational bias |            |               |             |              | Directional bias |            |            |            |              |
|---------|---------------------------------------------------------------|-----------------------|------------|---------------|-------------|--------------|------------------|------------|------------|------------|--------------|
|         |                                                               | regulated             |            | not regulated |             | $\rho$       | up-reg.          |            | down-reg.  |            | $\rho$       |
|         |                                                               | term                  | n.term     | term          | n.term      |              | term             | n.term     | term       | n.term     |              |
| 0050791 | regulation of physiological process                           | 90                    | 772        | 257           | 1903        | 0.284        | <b>53</b>        | <b>280</b> | <b>37</b>  | <b>492</b> | <b>5E-05</b> |
| 0050874 | organismal physiological process                              | 72                    | 790        | 156           | 2004        | 0.324        | <b>47</b>        | <b>286</b> | <b>25</b>  | <b>504</b> | <b>2E-06</b> |
| 0050875 | cellular physiological process                                | 463                   | 399        | 1090          | 1070        | 0.116        | 179              | 154        | 284        | 245        | 0.96         |
| 0006810 | transport                                                     | 127                   | 735        | 274           | 1886        | 0.15         | 55               | 278        | 72         | 457        | 0.283        |
| 0006811 | ion transport                                                 | 39                    | 823        | 81            | 2079        | 0.378        | 18               | 315        | 21         | 508        | 0.413        |
| 0006818 | hydrogen transport                                            | 6                     | 856        | 13            | 2147        | 0.967        | 0                | 333        | 6          | 523        | 0.126        |
| 0006836 | neurotransmitter transport                                    | <b>5</b>              | <b>857</b> | <b>1</b>      | <b>2159</b> | <b>0.012</b> | <b>5</b>         | <b>328</b> | <b>0</b>   | <b>529</b> | <b>0.018</b> |
| 0006858 | extracellular transport                                       | <b>9</b>              | <b>853</b> | <b>6</b>      | <b>2154</b> | <b>0.016</b> | <b>2</b>         | <b>331</b> | <b>7</b>   | <b>522</b> | <b>0.501</b> |
| 0006869 | lipid transport                                               | 4                     | 858        | 13            | 2147        | 0.851        | 1                | 332        | 3          | 526        | 0.963        |
| 0008643 | carbohydrate transport                                        | 5                     | 857        | 10            | 2150        | 0.899        | 2                | 331        | 3          | 526        | 0.691        |
| 0015031 | protein transport                                             | 55                    | 807        | 124           | 2036        | 0.557        | 19               | 314        | 36         | 493        | 0.617        |
| 0015837 | amine transport                                               | <b>8</b>              | <b>854</b> | <b>5</b>      | <b>2155</b> | <b>0.02</b>  | 5                | 328        | 3          | 526        | 0.304        |
| 0015931 | nucleobase, nucleoside, nucleotide and nucleic acid transport | <b>0</b>              | <b>862</b> | <b>14</b>     | <b>2146</b> | <b>0.038</b> | 0                | 333        | 0          | 529        | -            |
| 0016192 | vesicle-mediated transport                                    | 40                    | 822        | 80            | 2080        | 0.277        | 20               | 313        | 20         | 509        | 0.178        |
| 0045045 | secretory pathway                                             | 36                    | 826        | 60            | 2100        | 0.062        | 16               | 317        | 20         | 509        | 0.578        |
| 0046907 | intracellular transport                                       | 59                    | 803        | 140           | 2020        | 0.778        | 21               | 312        | 38         | 491        | 0.72         |
| 0051049 | regulation of transport                                       | 6                     | 856        | 12            | 2148        | 0.848        | 3                | 330        | 3          | 526        | 0.878        |
| 0008283 | cell proliferation                                            | 22                    | 840        | 50            | 2110        | 0.799        | <b>15</b>        | <b>318</b> | <b>7</b>   | <b>522</b> | <b>0.008</b> |
| 0007049 | cell cycle                                                    | 35                    | 827        | 96            | 2064        | 0.712        | <b>21</b>        | <b>312</b> | <b>14</b>  | <b>515</b> | <b>0.013</b> |
| 0017145 | stem cell division                                            | 4                     | 858        | 8             | 2152        | 0.961        | 2                | 331        | 2          | 527        | 0.963        |
| 0016043 | cell organization and biogenesis                              | 77                    | 785        | 197           | 1963        | 0.927        | <b>49</b>        | <b>284</b> | <b>28</b>  | <b>501</b> | <b>4E-06</b> |
| 0000902 | cellular morphogenesis                                        | 21                    | 841        | 53            | 2107        | 0.919        | <b>15</b>        | <b>318</b> | <b>6</b>   | <b>523</b> | <b>0.004</b> |
| 0006996 | organelle organization and biogenesis                         | 63                    | 799        | 175           | 1985        | 0.512        | <b>36</b>        | <b>297</b> | <b>27</b>  | <b>502</b> | <b>0.003</b> |
| 0007010 | cytoskeleton organization and biogenesis                      | 50                    | 812        | 116           | 2044        | 0.704        | <b>29</b>        | <b>304</b> | <b>21</b>  | <b>508</b> | <b>0.006</b> |
| 0006997 | nuclear organization and biogenesis                           | 2                     | 860        | 7             | 2153        | 0.96         | 1                | 332        | 1          | 528        | 0.692        |
| 0007028 | cytoplasm organization and biogenesis                         | 8                     | 854        | 9             | 2151        | 0.153        | 3                | 330        | 5          | 524        | 0.765        |
| 0016044 | membrane organization and biogenesis                          | 3                     | 859        | 5             | 2155        | 0.864        | 2                | 331        | 1          | 528        | 0.685        |
| 0051128 | regulation of cell organization and biogenesis                | 1                     | 861        | 11            | 2149        | 0.218        | 0                | 333        | 1          | 528        | 0.815        |
| 0016049 | cell growth                                                   | 1                     | 861        | 8             | 2152        | 0.43         | 0                | 333        | 1          | 528        | 0.815        |
| 0050896 | response to stimulus                                          | 55                    | 807        | 121           | 2039        | 0.46         | 27               | 306        | 28         | 501        | 0.133        |
| 0006950 | response to stress                                            | 20                    | 842        | 38            | 2122        | 0.385        | 9                | 324        | 11         | 518        | 0.719        |
| 0009408 | response to heat                                              | 5                     | 857        | 6             | 2154        | 0.362        | 4                | 329        | 1          | 528        | 0.149        |
| 0006979 | response to oxidative stress                                  | 0                     | 862        | 2             | 2158        | 0.912        | 0                | 333        | 0          | 529        | -            |
| 0051179 | localization                                                  | 133                   | 729        | 296           | 1864        | 0.242        | 59               | 274        | 74         | 455        | 0.168        |
| 0006403 | RNA localization                                              | <b>3</b>              | <b>859</b> | <b>26</b>     | <b>2134</b> | <b>0.049</b> | 2                | 331        | 1          | 528        | 0.685        |
| 0008104 | protein localization                                          | 56                    | 806        | 136           | 2024        | 0.904        | 19               | 314        | 37         | 492        | 0.545        |
| 0051234 | establishment of localization                                 | 130                   | 732        | 276           | 1884        | 0.106        | 58               | 275        | 72         | 457        | 0.155        |
| 0051235 | maintenance of localization                                   | 1                     | 861        | 2             | 2158        | 0.649        | 1                | 332        | 0          | 529        | 0.815        |
| 0050789 | regulation of biological process                              | 103                   | 759        | 299           | 1861        | 0.185        | <b>60</b>        | <b>273</b> | <b>43</b>  | <b>486</b> | <b>2E-05</b> |
| 0050790 | regulation of enzyme activity                                 | 3                     | 859        | 12            | 2148        | 0.655        | 1                | 332        | 2          | 527        | 0.685        |
| 0040029 | regulation of gene expression, epigenetic                     | 1                     | <b>861</b> | <b>19</b>     | <b>2141</b> | <b>0.037</b> | 1                | 332        | 0          | 529        | 0.815        |
| 0006306 | DNA methylation                                               | 1                     | 861        | 6             | 2154        | 0.677        | 1                | 332        | 0          | 529        | 0.815        |
| 0045814 | negative regulation of gene expression, epigenetic            | 0                     | 862        | 7             | 2153        | 0.21         | 0                | 333        | 0          | 529        | -            |
| 0006342 | chromatin silencing                                           | 0                     | 862        | 7             | 2153        | 0.21         | 0                | 333        | 0          | 529        | -            |
| 0003674 | molecular_function                                            | <b>528</b>            | <b>334</b> | <b>1236</b>   | <b>924</b>  | <b>0.047</b> | 208              | 125        | 320        | 209        | 0.612        |
| 0016209 | antioxidant activity                                          | 1                     | 861        | 7             | 2153        | 0.54         | 0                | 333        | 1          | 528        | 0.815        |
| 0005488 | binding                                                       | 304                   | 558        | 738           | 1422        | 0.595        | <b>139</b>       | <b>194</b> | <b>165</b> | <b>364</b> | <b>0.002</b> |
| 0005509 | calcium ion binding                                           | 21                    | 841        | 37            | 2123        | 0.245        | 11               | 322        | 10         | 519        | 0.279        |
| 0030246 | carbohydrate binding                                          | 5                     | 857        | 9             | 2151        | 0.764        | 1                | 332        | 4          | 525        | 0.691        |
| 0008289 | lipid binding                                                 | 9                     | 853        | 17            | 2143        | 0.636        | 4                | 329        | 5          | 524        | 0.987        |
| 0003676 | nucleic acid binding                                          | 124                   | 738        | 300           | 1860        | 0.767        | 48               | 285        | 76         | 453        | 0.936        |
| 0003677 | DNA binding                                                   | 49                    | 813        | 146           | 2014        | 0.315        | <b>37</b>        | <b>296</b> | <b>12</b>  | <b>517</b> | <b>1E-07</b> |
| 0003682 | chromatin binding                                             | 3                     | 859        | 21            | 2139        | 0.129        | 2                | 331        | 1          | 528        | 0.685        |
| 0003700 | transcription factor activity                                 | 24                    | 838        | 63            | 2097        | 0.939        | <b>21</b>        | <b>312</b> | <b>3</b>   | <b>526</b> | <b>2E-06</b> |
| 0003723 | RNA binding                                                   | 35                    | 827        | 88            | 2072        | 0.933        | <b>5</b>         | <b>328</b> | <b>30</b>  | <b>499</b> | <b>0.004</b> |
| 0008135 | translation factor activity, nucleic acid binding             | 11                    | 851        | 23            | 2137        | 0.759        | <b>0</b>         | <b>333</b> | <b>11</b>  | <b>518</b> | <b>0.019</b> |
| 0000166 | nucleotide binding                                            | 67                    | 795        | 189           | 1971        | 0.424        | 30               | 303        | 37         | 492        | 0.345        |
| 0005515 | protein binding                                               | 119                   | 743        | 263           | 1897        | 0.248        | <b>71</b>        | <b>262</b> | <b>48</b>  | <b>481</b> | <b>7E-07</b> |
| 0008134 | transcription factor binding                                  | 7                     | 855        | 22            | 2138        | 0.75         | <b>6</b>         | <b>327</b> | <b>1</b>   | <b>528</b> | <b>0.029</b> |
| 0008092 | cytoskeletal protein binding                                  | 33                    | 829        | 56            | 2104        | 0.09         | <b>19</b>        | <b>314</b> | <b>14</b>  | <b>515</b> | <b>0.036</b> |
| 0003779 | actin binding                                                 | <b>23</b>             | <b>839</b> | <b>31</b>     | <b>2129</b> | <b>0.031</b> | 10               | 323        | 13         | 516        | 0.79         |
| 0003824 | catalytic activity                                            | 237                   | 625        | 603           | 1557        | 0.85         | <b>71</b>        | <b>262</b> | <b>166</b> | <b>363</b> | <b>0.002</b> |
| 0016787 | hydrolase activity                                            | 93                    | 769        | 267           | 1893        | 0.253        | 37               | 296        | 56         | 473        | 0.897        |
| 0003924 | GTPase activity                                               | 11                    | 851        | 25            | 2135        | 0.932        | 2                | 331        | 9          | 520        | 0.276        |
| 0004518 | nuclease activity                                             | 6                     | 856        | 8             | 2152        | 0.371        | 0                | 333        | 6          | 523        | 0.126        |



## Manganese (p &lt; 0.01)

| GO#     | GO term                                    | Representational bias |            |               |             |              | Directional bias |            |            |            |              |
|---------|--------------------------------------------|-----------------------|------------|---------------|-------------|--------------|------------------|------------|------------|------------|--------------|
|         |                                            | regulated             |            | not regulated |             | $\rho$       | up-reg.          |            | down-reg.  |            | $\rho$       |
|         |                                            | term                  | n.term     | term          | n.term      |              | term             | n.term     | term       | n.term     |              |
| 0008233 | peptidase activity                         | 27                    | 835        | 86            | 2074        | 0.315        | 13               | 320        | 14         | 515        | 0.406        |
| 0004721 | phosphoprotein phosphatase activity        | 4                     | 858        | 25            | 2135        | 0.119        | 3                | 330        | 1          | 528        | 0.326        |
| 0016740 | transferase activity                       | 67                    | 795        | 180           | 1980        | 0.664        | 23               | 310        | 44         | 485        | 0.534        |
| 0016301 | kinase activity                            | 38                    | 824        | 102           | 2058        | 0.783        | 18               | 315        | 20         | 509        | 0.337        |
| 0004672 | protein kinase activity                    | 24                    | 838        | 72            | 2088        | 0.508        | 13               | 320        | 11         | 518        | 0.17         |
| 0030234 | enzyme regulator activity                  | 31                    | 831        | 80            | 2080        | 0.972        | 17               | 316        | 14         | 515        | 0.089        |
| 0003774 | motor activity                             | 6                     | 856        | 21            | 2139        | 0.607        | 4                | 329        | 2          | 527        | 0.32         |
| 0004871 | signal transducer activity                 | 67                    | 795        | 184           | 1976        | 0.55         | <b>42</b>        | <b>291</b> | <b>25</b>  | <b>504</b> | <b>4E-05</b> |
| 0004872 | receptor activity                          | 27                    | 835        | 77            | 2083        | 0.632        | <b>18</b>        | <b>315</b> | <b>9</b>   | <b>520</b> | <b>0.005</b> |
| 0004879 | ligand-dependent nuclear receptor activity | 4                     | 858        | 5             | 2155        | 0.49         | 3                | 330        | 1          | 528        | 0.326        |
| 0004888 | transmembrane receptor activity            | 14                    | 848        | 57            | 2103        | 0.126        | <b>11</b>        | <b>322</b> | <b>3</b>   | <b>526</b> | <b>0.005</b> |
| 0004930 | G-protein coupled receptor activity        | 6                     | 856        | 23            | 2137        | 0.464        | 5                | 328        | 1          | 528        | 0.066        |
| 0005057 | receptor signaling protein activity        | 18                    | 844        | 64            | 2096        | 0.225        | 10               | 323        | 8          | 521        | 0.213        |
| 0005102 | receptor binding                           | 21                    | 841        | 46            | 2114        | 0.704        | <b>15</b>        | <b>318</b> | <b>6</b>   | <b>523</b> | <b>0.004</b> |
| 0005198 | structural molecule activity               | <b>68</b>             | <b>794</b> | <b>126</b>    | <b>2034</b> | <b>0.046</b> | 23               | 310        | 45         | 484        | 0.472        |
| 0030528 | transcription regulator activity           | 52                    | 810        | 146           | 2014        | 0.517        | <b>37</b>        | <b>296</b> | <b>15</b>  | <b>514</b> | <b>1E-06</b> |
| 0045182 | translation regulator activity             | 11                    | 851        | 23            | 2137        | 0.759        | <b>0</b>         | <b>333</b> | <b>11</b>  | <b>518</b> | <b>0.019</b> |
| 0005215 | transporter activity                       | <b>86</b>             | <b>776</b> | <b>165</b>    | <b>1995</b> | <b>0.042</b> | 30               | 303        | 56         | 473        | 0.525        |
| 0005489 | electron transporter activity              | 10                    | 852        | 19            | 2141        | 0.612        | 1                | 332        | 9          | 520        | 0.123        |
| 0005216 | ion channel activity                       | 13                    | 849        | 38            | 2122        | 0.743        | <b>10</b>        | <b>323</b> | <b>3</b>   | <b>526</b> | <b>0.01</b>  |
| 0005244 | voltage-gated ion channel activity         | 9                     | 853        | 17            | 2143        | 0.636        | <b>8</b>         | <b>325</b> | <b>1</b>   | <b>528</b> | <b>0.006</b> |
| 0005575 | cellular_component                         | 376                   | 486        | 873           | 1287        | 0.116        | 140              | 193        | 236        | 293        | 0.503        |
| 0005623 | cell                                       | 350                   | 512        | 793           | 1367        | 0.051        | 129              | 204        | 221        | 308        | 0.416        |
| 0005622 | intracellular                              | 267                   | 595        | 628           | 1532        | 0.323        | <b>84</b>        | <b>249</b> | <b>183</b> | <b>346</b> | <b>0.005</b> |
| 0005737 | cytoplasm                                  | <b>166</b>            | <b>696</b> | <b>326</b>    | <b>1834</b> | <b>0.006</b> | <b>30</b>        | <b>303</b> | <b>136</b> | <b>393</b> | <b>2E-09</b> |
| 0016023 | cytoplasmic vesicle                        | 18                    | 844        | 25            | 2135        | 0.075        | 9                | 324        | 9          | 520        | 0.449        |
| 0005829 | cytosol                                    | <b>43</b>             | <b>819</b> | <b>69</b>     | <b>2091</b> | <b>0.024</b> | <b>0</b>         | <b>333</b> | <b>43</b>  | <b>486</b> | <b>2E-07</b> |
| 0005783 | endoplasmic reticulum                      | 16                    | 846        | 41            | 2119        | 0.943        | <b>0</b>         | <b>333</b> | <b>16</b>  | <b>513</b> | <b>0.003</b> |
| 0005794 | Golgi apparatus                            | 6                     | 856        | 20            | 2140        | 0.689        | 2                | 331        | 4          | 525        | 0.878        |
| 0005815 | microtubule organizing center              | 3                     | 859        | 6             | 2154        | 0.96         | 3                | 330        | 0          | 529        | 0.111        |
| 0005739 | mitochondrion                              | 38                    | 824        | 71            | 2089        | 0.166        | <b>3</b>         | <b>330</b> | <b>35</b>  | <b>494</b> | <b>1E-04</b> |
| 0005840 | ribosome                                   | <b>28</b>             | <b>834</b> | <b>29</b>     | <b>2131</b> | <b>9E-04</b> | <b>0</b>         | <b>333</b> | <b>28</b>  | <b>501</b> | <b>5E-05</b> |
| 0005773 | vacuole                                    | 5                     | 857        | 11            | 2149        | 0.972        | 0                | 333        | 5          | 524        | 0.187        |
| 0005764 | lysosome                                   | 1                     | 861        | 5             | 2155        | 0.848        | 0                | 333        | 1          | 528        | 0.815        |
| 0005856 | cytoskeleton                               | 21                    | 841        | 63            | 2097        | 0.547        | <b>14</b>        | <b>319</b> | <b>7</b>   | <b>522</b> | <b>0.015</b> |
| 0005694 | chromosome                                 | 6                     | 856        | 32            | 2128        | 0.117        | 5                | 328        | 1          | 528        | 0.066        |
| 0000228 | nuclear chromosome                         | 1                     | 861        | 4             | 2156        | 0.942        | 1                | 332        | 0          | 529        | 0.815        |
| 0005634 | nucleus                                    | 96                    | 766        | 280           | 1880        | 0.189        | <b>53</b>        | <b>280</b> | <b>43</b>  | <b>486</b> | <b>6E-04</b> |
| 0005635 | nuclear membrane                           | 3                     | 859        | 15            | 2145        | 0.392        | 1                | 332        | 2          | 527        | 0.685        |
| 0005730 | nucleolus                                  | 4                     | 858        | 7             | 2153        | 0.808        | 1                | 332        | 3          | 526        | 0.963        |
| 0005654 | nucleoplasm                                | 14                    | 848        | 60            | 2100        | 0.085        | 4                | 329        | 10         | 519        | 0.615        |
| 0005777 | peroxisome                                 | 4                     | 858        | 5             | 2155        | 0.49         | 0                | 333        | 4          | 525        | 0.282        |
| 0005886 | plasma membrane                            | 50                    | 812        | 97            | 2063        | 0.156        | <b>34</b>        | <b>299</b> | <b>16</b>  | <b>513</b> | <b>2E-05</b> |
| 0005576 | extracellular region                       | 19                    | 843        | 51            | 2109        | 0.9          | <b>16</b>        | <b>317</b> | <b>3</b>   | <b>526</b> | <b>1E-04</b> |
| 0005578 | extracellular matrix (sensu Metazoa)       | 9                     | 853        | 26            | 2134        | 0.856        | <b>9</b>         | <b>324</b> | <b>0</b>   | <b>529</b> | <b>5E-04</b> |

| GO#     | GO term                                                                           | Representational bias |            |               |             |              | Directional bias |            |           |            |              |
|---------|-----------------------------------------------------------------------------------|-----------------------|------------|---------------|-------------|--------------|------------------|------------|-----------|------------|--------------|
|         |                                                                                   | regulated             |            | not regulated |             | p            | up-reg.          |            | down-reg. |            | p            |
|         |                                                                                   | term                  | n.term     | term          | n.term      |              | term             | n.term     | term      | n.term     |              |
| 0008150 | biological_process                                                                | 294                   | 211        | 1495          | 1022        | 0.658        | 154              | 125        | 140       | 86         | 0.15         |
| 0007610 | behavior                                                                          | 33                    | 472        | 125           | 2392        | 0.182        | 16               | 263        | 17        | 209        | 0.531        |
| 0030534 | adult behavior                                                                    | 3                     | 502        | 20            | 2497        | 0.847        | 1                | 278        | 2         | 224        | 0.855        |
| 0030537 | larval behavior                                                                   | 2                     | 503        | 7             | 2510        | 0.997        | 0                | 279        | 2         | 224        | 0.389        |
| 0007611 | learning and/or memory                                                            | 7                     | 498        | 17            | 2500        | 0.171        | 3                | 276        | 4         | 222        | 0.779        |
| 0007612 | learning                                                                          | <b>6</b>              | <b>499</b> | <b>9</b>      | <b>2508</b> | <b>0.038</b> | 3                | 276        | 3         | 223        | 0.878        |
| 0007613 | memory                                                                            | 2                     | 503        | 9             | 2508        | 0.784        | 1                | 278        | 1         | 225        | 0.574        |
| 0007626 | locomotory behavior                                                               | 22                    | 483        | 98            | 2419        | 0.718        | 11               | 268        | 11        | 215        | 0.774        |
| 0007635 | chemosensory behavior                                                             | 5                     | 500        | 12            | 2505        | 0.279        | 3                | 276        | 2         | 224        | 0.813        |
| 0007622 | rhythmic behavior                                                                 | <b>7</b>              | <b>498</b> | <b>7</b>      | <b>2510</b> | <b>0.003</b> | 3                | 276        | 4         | 222        | 0.779        |
| 0048512 | circadian behavior                                                                | <b>6</b>              | <b>499</b> | <b>7</b>      | <b>2510</b> | <b>0.013</b> | 2                | 277        | 4         | 222        | 0.501        |
| 0009987 | cellular process                                                                  | 273                   | 232        | 1388          | 1129        | 0.69         | 143              | 136        | 130       | 96         | 0.188        |
| 0007154 | cell communication                                                                | 96                    | 409        | 391           | 2126        | 0.061        | 62               | 217        | 34        | 192        | 0.054        |
| 0007155 | cell adhesion                                                                     | <b>22</b>             | <b>483</b> | <b>63</b>     | <b>2454</b> | <b>0.031</b> | 15               | 264        | 7         | 219        | 0.304        |
| 0008037 | cell recognition                                                                  | 1                     | 504        | 1             | 2516        | 0.753        | 1                | 278        | 0         | 226        | 0.916        |
| 0008038 | neuronal cell recognition                                                         | 1                     | 504        | 1             | 2516        | 0.753        | 1                | 278        | 0         | 226        | 0.916        |
| 0016337 | cell-cell adhesion                                                                | 10                    | 495        | 25            | 2492        | 0.096        | 6                | 273        | 4         | 222        | 0.987        |
| 0016339 | calcium-dependent cell-cell adhesion                                              | 2                     | 503        | 2             | 2515        | 0.265        | 1                | 278        | 1         | 225        | 0.574        |
| 0007156 | homophilic cell adhesion                                                          | 3                     | 502        | 3             | 2514        | 0.101        | 2                | 277        | 1         | 225        | 0.855        |
| 0007160 | cell-matrix adhesion                                                              | 0                     | 505        | 9             | 2508        | 0.369        | 0                | 279        | 0         | 226        | -            |
| 0007267 | cell-cell signaling                                                               | 29                    | 476        | 125           | 2392        | 0.54         | 19               | 260        | 10        | 216        | 0.34         |
| 0019226 | transmission of nerve impulse                                                     | 27                    | 478        | 109           | 2408        | 0.375        | 18               | 261        | 9         | 217        | 0.304        |
| 0007268 | synaptic transmission                                                             | 22                    | 483        | 79            | 2438        | 0.21         | 15               | 264        | 7         | 219        | 0.304        |
| 0007270 | nerve-nerve synaptic transmission                                                 | 1                     | 504        | 15            | 2502        | 0.43         | 0                | 279        | 1         | 225        | 0.916        |
| 0001505 | regulation of neurotransmitter levels                                             | 16                    | 489        | 44            | 2473        | 0.056        | 12               | 267        | 4         | 222        | 0.174        |
| 0042133 | neurotransmitter metabolism                                                       | <b>4</b>              | <b>501</b> | <b>4</b>      | <b>2513</b> | <b>0.04</b>  | 3                | 276        | 1         | 225        | 0.77         |
| 0007269 | neurotransmitter secretion                                                        | 12                    | 493        | 41            | 2476        | 0.326        | 9                | 270        | 3         | 223        | 0.272        |
| 0007165 | signal transduction                                                               | 70                    | 435        | 307           | 2210        | 0.337        | 42               | 237        | 28        | 198        | 0.464        |
| 0007166 | cell surface receptor linked signal transduction                                  | 31                    | 474        | 125           | 2392        | 0.329        | 16               | 263        | 15        | 211        | 0.815        |
| 0007167 | enzyme linked receptor protein signaling pathway                                  | <b>14</b>             | <b>491</b> | <b>31</b>     | <b>2486</b> | <b>0.016</b> | 5                | 274        | 9         | 217        | 0.223        |
| 0007178 | transmembrane receptor protein serine/threonine kinase signaling pathway          | 3                     | 502        | 12            | 2505        | 0.996        | 1                | 278        | 2         | 224        | 0.855        |
| 0007179 | transforming growth factor beta receptor signaling pathway                        | 2                     | 503        | 7             | 2510        | 0.997        | 1                | 278        | 1         | 225        | 0.574        |
| 0007169 | transmembrane receptor protein tyrosine kinase signaling pathway                  | <b>11</b>             | <b>494</b> | <b>20</b>     | <b>2497</b> | <b>0.01</b>  | 4                | 275        | 7         | 219        | 0.334        |
| 0007173 | epidermal growth factor receptor signaling pathway                                | 3                     | 502        | 4             | 2513        | 0.177        | 0                | 279        | 3         | 223        | 0.178        |
| 0008286 | insulin receptor signaling pathway                                                | 0                     | 505        | 4             | 2513        | 0.821        | 0                | 279        | 0         | 226        | -            |
| 0008293 | torso signaling pathway                                                           | <b>4</b>              | <b>501</b> | <b>3</b>      | <b>2514</b> | <b>0.018</b> | 1                | 278        | 3         | 223        | 0.474        |
| 0007186 | G-protein coupled receptor protein signaling pathway                              | 9                     | 496        | 62            | 2455        | 0.447        | 8                | 271        | 1         | 225        | 0.087        |
| 0007200 | G-protein signaling, coupled to IP3 second messenger (phospholipase C activating) | 1                     | 504        | 4             | 2513        | 0.687        | 1                | 278        | 0         | 226        | 0.916        |
| 0007219 | Notch signaling pathway                                                           | 4                     | 501        | 9             | 2508        | 0.323        | 2                | 277        | 2         | 224        | 0.77         |
| 0007224 | smoothened signaling pathway                                                      | 1                     | 504        | 5             | 2512        | 0.586        | 0                | 279        | 1         | 225        | 0.916        |
| 0008063 | Toll signaling pathway                                                            | 2                     | 503        | 2             | 2515        | 0.265        | 1                | 278        | 1         | 225        | 0.574        |
| 0016055 | Wnt receptor signaling pathway                                                    | <b>6</b>              | <b>499</b> | <b>8</b>      | <b>2509</b> | <b>0.023</b> | 2                | 277        | 4         | 222        | 0.501        |
| 0007242 | intracellular signaling cascade                                                   | 38                    | 467        | 148           | 2369        | 0.193        | 25               | 254        | 13        | 213        | 0.234        |
| 0007263 | nitric oxide mediated signal transduction                                         | 0                     | 505        | 3             | 2514        | 0.998        | 0                | 279        | 0         | 226        | -            |
| 0007243 | protein kinase cascade                                                            | 12                    | 493        | 32            | 2485        | 0.091        | 6                | 273        | 6         | 220        | 0.939        |
| 0007259 | JAK-STAT cascade                                                                  | 1                     | 504        | 5             | 2512        | 0.586        | 0                | 279        | 1         | 225        | 0.916        |
| 0000165 | MAPKKK cascade                                                                    | <b>11</b>             | <b>494</b> | <b>24</b>     | <b>2493</b> | <b>0.034</b> | 6                | 273        | 5         | 221        | 0.795        |
| 0019932 | second-messenger-mediated signaling                                               | 2                     | 503        | 20            | 2497        | 0.5          | 2                | 277        | 0         | 226        | 0.574        |
| 0019722 | calcium-mediated signaling                                                        | 0                     | 505        | 15            | 2502        | 0.164        | 0                | 279        | 0         | 226        | -            |
| 0048015 | phosphoinositide-mediated signaling                                               | 1                     | 504        | 4             | 2513        | 0.687        | 1                | 278        | 0         | 226        | 0.916        |
| 0007264 | small GTPase mediated signal transduction                                         | 9                     | 496        | 36            | 2481        | 0.693        | 6                | 273        | 3         | 223        | 0.721        |
| 0007265 | Ras protein signal transduction                                                   | 4                     | 501        | 7             | 2510        | 0.178        | 4                | 275        | 0         | 226        | 0.193        |
| 0009966 | regulation of signal transduction                                                 | 8                     | 497        | 24            | 2493        | 0.305        | 3                | 276        | 5         | 221        | 0.51         |
| 0007275 | development                                                                       | <b>94</b>             | <b>411</b> | <b>360</b>    | <b>2157</b> | <b>0.016</b> | 50               | 229        | 44        | 182        | 0.742        |
| 0007568 | aging                                                                             | 2                     | 503        | 9             | 2508        | 0.784        | 1                | 278        | 1         | 225        | 0.574        |
| 0030154 | cell differentiation                                                              | 20                    | 485        | 93            | 2424        | 0.874        | 10               | 269        | 10        | 216        | 0.801        |
| 0048468 | cell development                                                                  | 11                    | 494        | 59            | 2458        | 0.949        | 7                | 272        | 4         | 222        | 0.795        |
| 0000904 | cellular morphogenesis during differentiation                                     | 1                     | 504        | 17            | 2500        | 0.339        | 1                | 278        | 0         | 226        | 0.916        |
| 0042461 | photoreceptor cell development                                                    | 1                     | 504        | 17            | 2500        | 0.339        | 1                | 278        | 0         | 226        | 0.916        |
| 0042051 | eye photoreceptor development (sensu Endopterygota)                               | 1                     | 504        | 16            | 2501        | 0.382        | 1                | 278        | 0         | 226        | 0.916        |
| 0045165 | cell fate commitment                                                              | 9                     | 496        | 37            | 2480        | 0.746        | <b>1</b>         | <b>278</b> | <b>8</b>  | <b>218</b> | <b>0.019</b> |

| GO#     | GO term                                                        | Representational bias |            |               |             |              | Directional bias |            |            |            |              |
|---------|----------------------------------------------------------------|-----------------------|------------|---------------|-------------|--------------|------------------|------------|------------|------------|--------------|
|         |                                                                | regulated             |            | not regulated |             | $\rho$       | up-reg.          |            | down-reg.  |            | $\rho$       |
|         |                                                                | term                  | n.term     | term          | n.term      |              | term             | n.term     | term       | n.term     |              |
| 0001709 | cell fate determination                                        | 4                     | 501        | 24            | 2493        | 0.927        | 1                | 278        | 3          | 223        | 0.474        |
| 0007400 | neuroblast cell fate determination                             | 2                     | 503        | 6             | 2511        | 0.877        | 1                | 278        | 1          | 225        | 0.574        |
| 0001708 | cell fate specification                                        | 0                     | 505        | 7             | 2510        | 0.497        | 0                | 279        | 0          | 226        | -            |
| 0007349 | cellularization                                                | 2                     | 503        | 8             | 2509        | 0.885        | 0                | 279        | 2          | 224        | 0.389        |
| 0040007 | growth                                                         | 5                     | 500        | 31            | 2486        | 0.817        | 2                | 277        | 3          | 223        | 0.813        |
| 0002164 | larval development                                             | 5                     | 500        | 12            | 2505        | 0.279        | 2                | 277        | 3          | 223        | 0.813        |
| 0002165 | larval or pupal development (sensu Insecta)                    | 25                    | 480        | 100           | 2417        | 0.377        | 13               | 266        | 12         | 214        | 0.898        |
| 0007552 | metamorphosis                                                  | 24                    | 481        | 93            | 2424        | 0.318        | 12               | 267        | 12         | 214        | 0.749        |
| 0009653 | morphogenesis                                                  | <b>69</b>             | <b>436</b> | <b>247</b>    | <b>2270</b> | <b>0.012</b> | 38               | 241        | 31         | 195        | 0.921        |
| 0002009 | morphogenesis of an epithelium                                 | 11                    | 494        | 29            | 2488        | 0.104        | 4                | 275        | 7          | 219        | 0.334        |
| 0009887 | organogenesis                                                  | <b>60</b>             | <b>445</b> | <b>222</b>    | <b>2295</b> | <b>0.038</b> | 31               | 248        | 29         | 197        | 0.648        |
| 0001654 | eye morphogenesis                                              | 9                     | 496        | 46            | 2471        | 0.91         | 3                | 276        | 6          | 220        | 0.319        |
| 0008406 | gonad development                                              | 4                     | 501        | 6             | 2511        | 0.12         | 2                | 277        | 2          | 224        | 0.77         |
| 0007444 | imaginal disc development                                      | 16                    | 489        | 75            | 2442        | 0.933        | 6                | 273        | 10         | 216        | 0.232        |
| 0007494 | midgut development                                             | 1                     | 504        | 3             | 2514        | 0.821        | 1                | 278        | 0          | 226        | 0.916        |
| 0007517 | muscle development                                             | 6                     | 499        | 27            | 2490        | 0.995        | 6                | 273        | 0          | 226        | 0.071        |
| 0007399 | neurogenesis                                                   | 35                    | 470        | 130           | 2387        | 0.137        | 17               | 262        | 18         | 208        | 0.518        |
| 0007409 | axonogenesis                                                   | 6                     | 499        | 41            | 2476        | 0.594        | 3                | 276        | 3          | 223        | 0.878        |
| 0007411 | axon guidance                                                  | 5                     | 500        | 30            | 2487        | 0.874        | 3                | 276        | 2          | 224        | 0.813        |
| 0007417 | central nervous system development                             | 10                    | 495        | 29            | 2488        | 0.198        | 4                | 275        | 6          | 220        | 0.51         |
| 0016358 | dendrite morphogenesis                                         | 1                     | 504        | 13            | 2504        | 0.547        | 0                | 279        | 1          | 225        | 0.916        |
| 0042063 | gliogenesis                                                    | 2                     | 503        | 9             | 2508        | 0.784        | 2                | 277        | 0          | 226        | 0.574        |
| 0007422 | peripheral nervous system development                          | 8                     | 497        | 32            | 2485        | 0.728        | 3                | 276        | 5          | 221        | 0.51         |
| 0050767 | regulation of neurogenesis                                     | 1                     | 504        | 5             | 2512        | 0.586        | 0                | 279        | 1          | 225        | 0.916        |
| 0007424 | tracheal system development (sensu Insecta)                    | <b>12</b>             | <b>493</b> | <b>23</b>     | <b>2494</b> | <b>0.01</b>  | 6                | 273        | 6          | 220        | 0.939        |
| 0048513 | organ development                                              | 60                    | 445        | 226           | 2291        | 0.051        | 31               | 248        | 29         | 197        | 0.648        |
| 0007389 | pattern specification                                          | 18                    | 487        | 54            | 2463        | 0.08         | 9                | 270        | 9          | 217        | 0.83         |
| 0048066 | pigmentation                                                   | 4                     | 501        | 6             | 2511        | 0.12         | 2                | 277        | 2          | 224        | 0.77         |
| 0009791 | post-embryonic development                                     | 5                     | 500        | 12            | 2505        | 0.279        | 2                | 277        | 3          | 223        | 0.813        |
| 0009790 | embryonic development                                          | <b>31</b>             | <b>474</b> | <b>68</b>     | <b>2449</b> | <b>1E-04</b> | 16               | 263        | 15         | 211        | 0.815        |
| 0007530 | sex determination                                              | 2                     | 503        | 8             | 2509        | 0.885        | 1                | 278        | 1          | 225        | 0.574        |
| 0007548 | sex differentiation                                            | 4                     | 501        | 14            | 2503        | 0.755        | 2                | 277        | 2          | 224        | 0.77         |
| 0019827 | stem cell maintenance                                          | 3                     | 502        | 5             | 2512        | 0.27         | 1                | 278        | 2          | 224        | 0.855        |
| 0000003 | reproduction                                                   | 22                    | 483        | 112           | 2405        | 0.98         | 8                | 271        | 14         | 212        | 0.109        |
| 0050793 | regulation of development                                      | 4                     | 501        | 39            | 2478        | 0.269        | 2                | 277        | 2          | 224        | 0.77         |
| 0007582 | physiological process                                          | 266                   | 239        | 1373          | 1144        | 0.47         | <b>135</b>       | <b>144</b> | <b>131</b> | <b>95</b>  | <b>0.04</b>  |
| 0008152 | metabolism                                                     | 201                   | 304        | 1001          | 1516        | 0.971        | <b>98</b>        | <b>181</b> | <b>103</b> | <b>123</b> | <b>0.022</b> |
| 0009056 | catabolism                                                     | 29                    | 476        | 174           | 2343        | 0.389        | 19               | 260        | 10         | 216        | 0.34         |
| 0006091 | energy pathways                                                | 20                    | 485        | 88            | 2429        | 0.703        | 14               | 265        | 6          | 220        | 0.261        |
| 0006118 | electron transport                                             | 6                     | 499        | 50            | 2467        | 0.301        | 4                | 275        | 2          | 224        | 0.878        |
| 0006139 | nucleobase, nucleoside, nucleotide and nucleic acid metabolism | 73                    | 432        | 361           | 2156        | 0.997        | 46               | 233        | 27         | 199        | 0.188        |
| 0006259 | DNA metabolism                                                 | 13                    | 492        | 67            | 2450        | 0.968        | 9                | 270        | 4          | 222        | 0.456        |
| 0006350 | transcription                                                  | 33                    | 472        | 192           | 2325        | 0.446        | <b>25</b>        | <b>254</b> | <b>8</b>   | <b>218</b> | <b>0.023</b> |
| 0043170 | macromolecule metabolism                                       | 115                   | 390        | 546           | 1971        | 0.634        | <b>50</b>        | <b>229</b> | <b>65</b>  | <b>161</b> | <b>0.005</b> |
| 0019538 | protein metabolism                                             | 92                    | 413        | 466           | 2051        | 0.925        | <b>40</b>        | <b>239</b> | <b>52</b>  | <b>174</b> | <b>0.017</b> |
| 0006412 | protein biosynthesis                                           | 20                    | 485        | 123           | 2394        | 0.435        | 10               | 269        | 10         | 216        | 0.801        |
| 0006464 | protein modification                                           | 45                    | 460        | 212           | 2305        | 0.786        | 21               | 258        | 24         | 202        | 0.291        |
| 0006457 | protein folding                                                | 12                    | 493        | 32            | 2485        | 0.091        | <b>0</b>         | <b>279</b> | <b>12</b>  | <b>214</b> | <b>3E-04</b> |
| 0005975 | carbohydrate metabolism                                        | 26                    | 479        | 82            | 2435        | 0.05         | 11               | 268        | 15         | 211        | 0.246        |
| 0006519 | amino acid and derivative metabolism                           | 14                    | 491        | 57            | 2460        | 0.599        | <b>3</b>         | <b>276</b> | <b>11</b>  | <b>215</b> | <b>0.021</b> |
| 0006629 | lipid metabolism                                               | 18                    | 487        | 75            | 2442        | 0.58         | <b>5</b>         | <b>274</b> | <b>13</b>  | <b>213</b> | <b>0.032</b> |
| 0009308 | amine metabolism                                               | 17                    | 488        | 64            | 2453        | 0.371        | <b>4</b>         | <b>275</b> | <b>13</b>  | <b>213</b> | <b>0.015</b> |
| 0042440 | pigment metabolism                                             | 2                     | 503        | 10            | 2507        | 0.701        | 1                | 278        | 1          | 225        | 0.574        |
| 0042445 | hormone metabolism                                             | <b>4</b>              | <b>501</b> | <b>3</b>      | <b>2514</b> | <b>0.018</b> | 2                | 277        | 2          | 224        | 0.77         |
| 0009058 | biosynthesis                                                   | 40                    | 465        | 202           | 2315        | 0.991        | 18               | 261        | 22         | 204        | 0.233        |
| 0019748 | secondary metabolism                                           | 2                     | 503        | 12            | 2505        | 0.908        | 1                | 278        | 1          | 225        | 0.574        |
| 0019222 | regulation of metabolism                                       | 39                    | 466        | 195           | 2322        | 0.942        | <b>28</b>        | <b>251</b> | <b>11</b>  | <b>215</b> | <b>0.046</b> |
| 0016265 | death                                                          | 14                    | 491        | 74            | 2443        | 0.952        | 6                | 273        | 8          | 218        | 0.501        |
| 0008219 | cell death                                                     | 12                    | 493        | 64            | 2453        | 0.95         | 5                | 274        | 7          | 219        | 0.507        |
| 0016271 | tissue death                                                   | 6                     | 499        | 21            | 2496        | 0.609        | 4                | 275        | 2          | 224        | 0.878        |
| 0042592 | homeostasis                                                    | 8                     | 497        | 21            | 2496        | 0.184        | 4                | 275        | 4          | 222        | 0.954        |
| 0019725 | cell homeostasis                                               | 7                     | 498        | 19            | 2498        | 0.255        | 3                | 276        | 4          | 222        | 0.779        |
| 0050801 | ion homeostasis                                                | 5                     | 500        | 8             | 2509        | 0.083        | 2                | 277        | 3          | 223        | 0.813        |
| 0043062 | extracellular structure organization and biogenesis            | 3                     | 502        | 16            | 2501        | 0.841        | 2                | 277        | 1          | 225        | 0.855        |
| 0046903 | secretion                                                      | 17                    | 488        | 85            | 2432        | 0.902        | 11               | 268        | 6          | 220        | 0.582        |
| 0048511 | rhythmic process                                               | <b>7</b>              | <b>498</b> | <b>9</b>      | <b>2508</b> | <b>0.01</b>  | 3                | 276        | 4          | 222        | 0.779        |

| GO#     | GO term                                                       | Representational bias |            |               |             |              | Directional bias |            |           |            |              |
|---------|---------------------------------------------------------------|-----------------------|------------|---------------|-------------|--------------|------------------|------------|-----------|------------|--------------|
|         |                                                               | regulated             |            | not regulated |             | $\rho$       | up-reg.          |            | down-reg. |            | $\rho$       |
|         |                                                               | term                  | n.term     | term          | n.term      |              | term             | n.term     | term      | n.term     |              |
| 0050791 | regulation of physiological process                           | 57                    | 448        | 290           | 2227        | 0.941        | 34               | 245        | 23        | 203        | 0.57         |
| 0050874 | organismal physiological process                              | 41                    | 464        | 187           | 2330        | 0.658        | 25               | 254        | 16        | 210        | 0.545        |
| 0050875 | cellular physiological process                                | 250                   | 255        | 1303          | 1214        | 0.379        | 127              | 152        | 123       | 103        | 0.057        |
| 0006810 | transport                                                     | 64                    | 441        | 337           | 2180        | 0.718        | 32               | 247        | 32        | 194        | 0.442        |
| 0006811 | ion transport                                                 | 25                    | 480        | 95            | 2422        | 0.267        | 13               | 266        | 12        | 214        | 0.898        |
| 0006818 | hydrogen transport                                            | 6                     | 499        | 13            | 2504        | 0.152        | 5                | 274        | 1         | 225        | 0.328        |
| 0006836 | neurotransmitter transport                                    | 1                     | 504        | 5             | 2512        | 0.586        | 1                | 278        | 0         | 226        | 0.916        |
| 0006858 | extracellular transport                                       | 3                     | 502        | 12            | 2505        | 0.996        | 0                | 279        | 3         | 223        | 0.178        |
| 0006869 | lipid transport                                               | 3                     | 502        | 14            | 2503        | 0.824        | 1                | 278        | 2         | 224        | 0.855        |
| 0008643 | carbohydrate transport                                        | 4                     | 501        | 11            | 2506        | 0.491        | 2                | 277        | 2         | 224        | 0.77         |
| 0015031 | protein transport                                             | 22                    | 483        | 157           | 2360        | 0.126        | 11               | 268        | 11        | 215        | 0.774        |
| 0015837 | amine transport                                               | 2                     | 503        | 11            | 2506        | 0.807        | 0                | 279        | 2         | 224        | 0.389        |
| 0015931 | nucleobase, nucleoside, nucleotide and nucleic acid transport | 2                     | 503        | 12            | 2505        | 0.908        | 1                | 278        | 1         | 225        | 0.574        |
| 0016192 | vesicle-mediated transport                                    | 17                    | 488        | 103           | 2414        | 0.524        | 10               | 269        | 7         | 219        | 0.957        |
| 0045045 | secretory pathway                                             | 17                    | 488        | 79            | 2438        | 0.899        | 11               | 268        | 6         | 220        | 0.582        |
| 0046907 | intracellular transport                                       | 25                    | 480        | 174           | 2343        | 0.127        | 14               | 265        | 11        | 215        | 0.898        |
| 0051049 | regulation of transport                                       | 4                     | 501        | 14            | 2503        | 0.755        | 1                | 278        | 3         | 223        | 0.474        |
| 0008283 | cell proliferation                                            | 14                    | 491        | 58            | 2459        | 0.639        | 7                | 272        | 7         | 219        | 0.898        |
| 0007049 | cell cycle                                                    | 23                    | 482        | 108           | 2409        | 0.884        | 13               | 266        | 10        | 216        | 0.929        |
| 0017145 | stem cell division                                            | 4                     | 501        | 8             | 2509        | 0.247        | 2                | 277        | 2         | 224        | 0.77         |
| 0016043 | cell organization and biogenesis                              | 49                    | 456        | 225           | 2292        | 0.645        | 30               | 249        | 19        | 207        | 0.463        |
| 0000902 | cellular morphogenesis                                        | 12                    | 493        | 62            | 2455        | 0.966        | 7                | 272        | 5         | 221        | 0.939        |
| 0006996 | organelle organization and biogenesis                         | 44                    | 461        | 194           | 2323        | 0.5          | 25               | 254        | 19        | 207        | 0.952        |
| 0007010 | cytoskeleton organization and biogenesis                      | 33                    | 472        | 133           | 2384        | 0.308        | 19               | 260        | 14        | 212        | 0.923        |
| 0006997 | nuclear organization and biogenesis                           | 0                     | 505        | 9             | 2508        | 0.369        | 0                | 279        | 0         | 226        | -            |
| 0007028 | cytoplasm organization and biogenesis                         | 3                     | 502        | 14            | 2503        | 0.824        | 1                | 278        | 2         | 224        | 0.855        |
| 0016044 | membrane organization and biogenesis                          | 0                     | 505        | 8             | 2509        | 0.427        | 0                | 279        | 0         | 226        | -            |
| 0051128 | regulation of cell organization and biogenesis                | 2                     | 503        | 10            | 2507        | 0.701        | 1                | 278        | 1         | 225        | 0.574        |
| 0016049 | cell growth                                                   | 1                     | 504        | 8             | 2509        | 0.997        | 0                | 279        | 1         | 225        | 0.916        |
| 0050896 | response to stimulus                                          | 39                    | 466        | 137           | 2380        | 0.058        | 18               | 261        | 21        | 205        | 0.307        |
| 0006950 | response to stress                                            | <b>16</b>             | <b>489</b> | <b>42</b>     | <b>2475</b> | <b>0.039</b> | <b>2</b>         | <b>277</b> | <b>14</b> | <b>212</b> | <b>0.001</b> |
| 0009408 | response to heat                                              | <b>6</b>              | <b>499</b> | <b>5</b>      | <b>2512</b> | <b>0.003</b> | <b>0</b>         | <b>279</b> | <b>6</b>  | <b>220</b> | <b>0.02</b>  |
| 0006979 | response to oxidative stress                                  | 0                     | 505        | 2             | 2515        | 0.753        | 0                | 279        | 0         | 226        | -            |
| 0051179 | localization                                                  | 69                    | 436        | 360           | 2157        | 0.76         | 33               | 246        | 36        | 190        | 0.229        |
| 0006403 | RNA localization                                              | 3                     | 502        | 26            | 2491        | 0.501        | 1                | 278        | 2         | 224        | 0.855        |
| 0008104 | protein localization                                          | 24                    | 481        | 168           | 2349        | 0.129        | 11               | 268        | 13        | 213        | 0.459        |
| 0051234 | establishment of localization                                 | 64                    | 441        | 342           | 2175        | 0.632        | 32               | 247        | 32        | 194        | 0.442        |
| 0051235 | maintenance of localization                                   | 1                     | 504        | 2             | 2515        | 0.998        | 1                | 278        | 0         | 226        | 0.916        |
| 0050789 | regulation of biological process                              | 71                    | 434        | 331           | 2186        | 0.633        | 40               | 239        | 31        | 195        | 0.944        |
| 0050790 | regulation of enzyme activity                                 | 4                     | 501        | 11            | 2506        | 0.491        | 2                | 277        | 2         | 224        | 0.77         |
| 0040029 | regulation of gene expression, epigenetic                     | 3                     | 502        | 17            | 2500        | 0.924        | 1                | 278        | 2         | 224        | 0.855        |
| 0006306 | DNA methylation                                               | 1                     | 504        | 6             | 2511        | 0.738        | 1                | 278        | 0         | 226        | 0.916        |
| 0045814 | negative regulation of gene expression, epigenetic            | 1                     | 504        | 6             | 2511        | 0.738        | 0                | 279        | 1         | 225        | 0.916        |
| 0006342 | chromatin silencing                                           | 1                     | 504        | 6             | 2511        | 0.738        | 0                | 279        | 1         | 225        | 0.916        |
| 0003674 | molecular_function                                            | 285                   | 220        | 1479          | 1038        | 0.359        | 147              | 132        | 138       | 88         | 0.072        |
| 0016209 | antioxidant activity                                          | 0                     | 505        | 8             | 2509        | 0.427        | 0                | 279        | 0         | 226        | -            |
| 0005488 | binding                                                       | 176                   | 329        | 866           | 1651        | 0.888        | 93               | 186        | 83        | 143        | 0.483        |
| 0005509 | calcium ion binding                                           | 7                     | 498        | 51            | 2466        | 0.436        | 4                | 275        | 3         | 223        | 0.779        |
| 0030246 | carbohydrate binding                                          | 1                     | 504        | 13            | 2504        | 0.547        | 0                | 279        | 1         | 225        | 0.916        |
| 0008289 | lipid binding                                                 | 5                     | 500        | 21            | 2496        | 0.935        | 4                | 275        | 1         | 225        | 0.505        |
| 0003676 | nucleic acid binding                                          | 68                    | 437        | 356           | 2161        | 0.741        | 41               | 238        | 27        | 199        | 0.442        |
| 0003677 | DNA binding                                                   | 30                    | 475        | 165           | 2352        | 0.679        | 21               | 258        | 9         | 217        | 0.137        |
| 0003682 | chromatin binding                                             | 7                     | 498        | 17            | 2500        | 0.171        | 3                | 276        | 4         | 222        | 0.779        |
| 0003700 | transcription factor activity                                 | 13                    | 492        | 74            | 2443        | 0.762        | 10               | 269        | 3         | 223        | 0.19         |
| 0003723 | RNA binding                                                   | 21                    | 484        | 102           | 2415        | 0.989        | 10               | 269        | 11        | 215        | 0.621        |
| 0008135 | translation factor activity, nucleic acid binding             | 7                     | 498        | 27            | 2490        | 0.705        | 2                | 277        | 5         | 221        | 0.295        |
| 0000166 | nucleotide binding                                            | 49                    | 456        | 207           | 2310        | 0.316        | <b>17</b>        | <b>262</b> | <b>32</b> | <b>194</b> | <b>0.004</b> |
| 0005515 | protein binding                                               | 70                    | 435        | 312           | 2205        | 0.406        | 38               | 241        | 32        | 194        | 0.964        |
| 0008134 | transcription factor binding                                  | 7                     | 498        | 22            | 2495        | 0.408        | 4                | 275        | 3         | 223        | 0.779        |
| 0008092 | cytoskeletal protein binding                                  | 16                    | 489        | 73            | 2444        | 0.856        | 11               | 268        | 5         | 221        | 0.396        |
| 0003779 | actin binding                                                 | 7                     | 498        | 47            | 2470        | 0.575        | 4                | 275        | 3         | 223        | 0.779        |
| 0003824 | catalytic activity                                            | 137                   | 368        | 703           | 1814        | 0.755        | <b>64</b>        | <b>215</b> | <b>73</b> | <b>153</b> | <b>0.024</b> |
| 0016787 | hydrolase activity                                            | 54                    | 451        | 306           | 2211        | 0.394        | 31               | 248        | 23        | 203        | 0.847        |
| 0003924 | GTPase activity                                               | 5                     | 500        | 31            | 2486        | 0.817        | 2                | 277        | 3         | 223        | 0.813        |
| 0004518 | nuclease activity                                             | 2                     | 503        | 12            | 2505        | 0.908        | 2                | 277        | 0         | 226        | 0.574        |

## cGMP (p &lt; 0.01)

| GO#     | GO term                                    | Representational bias |            |               |             |              | Directional bias |        |           |        |        |
|---------|--------------------------------------------|-----------------------|------------|---------------|-------------|--------------|------------------|--------|-----------|--------|--------|
|         |                                            | regulated             |            | not regulated |             | $\rho$       | up-reg.          |        | down-reg. |        | $\rho$ |
|         |                                            | term                  | n.term     | term          | n.term      |              | term             | n.term | term      | n.term |        |
| 0008233 | peptidase activity                         | 12                    | 493        | 101           | 2416        | 0.101        | 10               | 269    | 2         | 224    | 0.092  |
| 0004721 | phosphoprotein phosphatase activity        | 5                     | 500        | 24            | 2493        | 0.863        | 3                | 276    | 2         | 224    | 0.813  |
| 0016740 | transferase activity                       | 44                    | 461        | 203           | 2314        | 0.692        | 20               | 259    | 24        | 202    | 0.227  |
| 0016301 | kinase activity                            | 23                    | 482        | 117           | 2400        | 0.981        | 10               | 269    | 13        | 213    | 0.343  |
| 0004672 | protein kinase activity                    | 19                    | 486        | 77            | 2440        | 0.494        | 9                | 270    | 10        | 216    | 0.639  |
| 0030234 | enzyme regulator activity                  | 25                    | 480        | 86            | 2431        | 0.123        | 15               | 264    | 10        | 216    | 0.776  |
| 0003774 | motor activity                             | 3                     | 502        | 24            | 2493        | 0.6          | 1                | 278    | 2         | 224    | 0.855  |
| 0004871 | signal transducer activity                 | 35                    | 470        | 216           | 2301        | 0.255        | 20               | 259    | 15        | 211    | 0.954  |
| 0004872 | receptor activity                          | <b>8</b>              | <b>497</b> | <b>96</b>     | <b>2421</b> | <b>0.018</b> | 4                | 275    | 4         | 222    | 0.954  |
| 0004879 | ligand-dependent nuclear receptor activity | 0                     | 505        | 9             | 2508        | 0.369        | 0                | 279    | 0         | 226    | -      |
| 0004888 | transmembrane receptor activity            | 7                     | 498        | 64            | 2453        | 0.16         | 4                | 275    | 3         | 223    | 0.779  |
| 0004930 | G-protein coupled receptor activity        | 2                     | 503        | 27            | 2490        | 0.241        | 2                | 277    | 0         | 226    | 0.574  |
| 0005057 | receptor signaling protein activity        | 13                    | 492        | 69            | 2448        | 0.951        | 6                | 273    | 7         | 219    | 0.7    |
| 0005102 | receptor binding                           | 14                    | 491        | 53            | 2464        | 0.446        | 10               | 269    | 4         | 222    | 0.336  |
| 0005198 | structural molecule activity               | 30                    | 475        | 164           | 2353        | 0.703        | 18               | 261    | 12        | 214    | 0.726  |
| 0030528 | transcription regulator activity           | 30                    | 475        | 168           | 2349        | 0.61         | 20               | 259    | 10        | 216    | 0.268  |
| 0045182 | translation regulator activity             | 7                     | 498        | 27            | 2490        | 0.705        | 2                | 277    | 5         | 221    | 0.295  |
| 0005215 | transporter activity                       | 44                    | 461        | 207           | 2310        | 0.783        | 24               | 255    | 20        | 206    | 0.952  |
| 0005489 | electron transporter activity              | 1                     | 504        | 28            | 2489        | 0.094        | 1                | 278    | 0         | 226    | 0.916  |
| 0005216 | ion channel activity                       | 7                     | 498        | 44            | 2473        | 0.699        | 2                | 277    | 5         | 221    | 0.295  |
| 0005244 | voltage-gated ion channel activity         | 5                     | 500        | 21            | 2496        | 0.935        | 2                | 277    | 3         | 223    | 0.813  |
| 0005575 | cellular_component                         | 201                   | 304        | 1048          | 1469        | 0.475        | 107              | 172    | 94        | 132    | 0.517  |
| 0005623 | cell                                       | 186                   | 319        | 957           | 1560        | 0.651        | 100              | 179    | 86        | 140    | 0.675  |
| 0005622 | intracellular                              | 144                   | 361        | 751           | 1766        | 0.589        | 78               | 201    | 66        | 160    | 0.834  |
| 0005737 | cytoplasm                                  | 73                    | 432        | 419           | 2098        | 0.25         | 38               | 241    | 35        | 191    | 0.641  |
| 0016023 | cytoplasmic vesicle                        | 7                     | 498        | 36            | 2481        | 0.897        | 5                | 274    | 2         | 224    | 0.628  |
| 0005829 | cytosol                                    | 12                    | 493        | 100           | 2417        | 0.109        | 4                | 275    | 8         | 218    | 0.211  |
| 0005783 | endoplasmic reticulum                      | 4                     | 501        | 53            | 2464        | 0.072        | 0                | 279    | 4         | 222    | 0.084  |
| 0005794 | Golgi apparatus                            | 4                     | 501        | 22            | 2495        | 0.935        | 2                | 277    | 2         | 224    | 0.77   |
| 0005815 | microtubule organizing center              | 2                     | 503        | 7             | 2510        | 0.997        | 1                | 278    | 1         | 225    | 0.574  |
| 0005739 | mitochondrion                              | 18                    | 487        | 91            | 2426        | 0.941        | 9                | 270    | 9         | 217    | 0.83   |
| 0005840 | ribosome                                   | 6                     | 499        | 51            | 2466        | 0.278        | 4                | 275    | 2         | 224    | 0.878  |
| 0005773 | vacuole                                    | 3                     | 502        | 13            | 2504        | 0.907        | 2                | 277    | 1         | 225    | 0.855  |
| 0005764 | lysosome                                   | 1                     | 504        | 5             | 2512        | 0.586        | 0                | 279    | 1         | 225    | 0.916  |
| 0005856 | cytoskeleton                               | 16                    | 489        | 68            | 2449        | 0.664        | 8                | 271    | 8         | 218    | 0.862  |
| 0005694 | chromosome                                 | 9                     | 496        | 29            | 2488        | 0.347        | 3                | 276    | 6         | 220    | 0.319  |
| 0000228 | nuclear chromosome                         | 1                     | 504        | 4             | 2513        | 0.687        | 0                | 279    | 1         | 225    | 0.916  |
| 0005634 | nucleus                                    | 62                    | 443        | 314           | 2203        | 0.961        | 36               | 243    | 26        | 200    | 0.734  |
| 0005635 | nuclear membrane                           | 2                     | 503        | 16            | 2501        | 0.748        | 1                | 278    | 1         | 225    | 0.574  |
| 0005730 | nucleolus                                  | 2                     | 503        | 9             | 2508        | 0.784        | 1                | 278    | 1         | 225    | 0.574  |
| 0005654 | nucleoplasm                                | 13                    | 492        | 61            | 2456        | 0.966        | 5                | 274    | 8         | 218    | 0.342  |
| 0005777 | peroxisome                                 | 1                     | 504        | 8             | 2509        | 0.997        | 0                | 279    | 1         | 225    | 0.916  |
| 0005886 | plasma membrane                            | 21                    | 484        | 126           | 2391        | 0.487        | 10               | 269    | 11        | 215    | 0.621  |
| 0005576 | extracellular region                       | 11                    | 494        | 59            | 2458        | 0.949        | 6                | 273    | 5         | 221    | 0.795  |
| 0005578 | extracellular matrix (sensu Metazoa)       | 6                     | 499        | 29            | 2488        | 0.874        | 4                | 275    | 2         | 224    | 0.878  |

| GO#     | GO term                                                                           | Representational bias |            |               |             |              | Directional bias |           |           |           |              |
|---------|-----------------------------------------------------------------------------------|-----------------------|------------|---------------|-------------|--------------|------------------|-----------|-----------|-----------|--------------|
|         |                                                                                   | regulated             |            | not regulated |             | $\rho$       | up-reg.          |           | down-reg. |           | $\rho$       |
|         |                                                                                   | term                  | n.term     | term          | n.term      |              | term             | n.term    | term      | n.term    |              |
| 0008150 | biological_process                                                                | 123                   | 90         | 1666          | 1143        | 0.708        | 65               | 59        | 58        | 31        | 0.086        |
| 0007610 | behavior                                                                          | 7                     | 206        | 151           | 2658        | 0.246        | 3                | 121       | 4         | 85        | 0.654        |
| 0030534 | adult behavior                                                                    | 1                     | 212        | 22            | 2787        | 0.921        | 1                | 123       | 0         | 89        | 0.867        |
| 0030537 | larval behavior                                                                   | 0                     | 213        | 9             | 2800        | 0.861        | 0                | 124       | 0         | 89        | -            |
| 0007611 | learning and/or memory                                                            | 0                     | 213        | 24            | 2785        | 0.34         | 0                | 124       | 0         | 89        | -            |
| 0007612 | learning                                                                          | 0                     | 213        | 15            | 2794        | 0.573        | 0                | 124       | 0         | 89        | -            |
| 0007613 | memory                                                                            | 0                     | 213        | 11            | 2798        | 0.745        | 0                | 124       | 0         | 89        | -            |
| 0007626 | locomotory behavior                                                               | 4                     | 209        | 116           | 2693        | 0.15         | 2                | 122       | 2         | 87        | 0.861        |
| 0007635 | chemosensory behavior                                                             | 0                     | 213        | 17            | 2792        | 0.507        | 0                | 124       | 0         | 89        | -            |
| 0007622 | rhythmic behavior                                                                 | 3                     | 210        | 11            | 2798        | 0.113        | 1                | 123       | 2         | 87        | 0.771        |
| 0048512 | circadian behavior                                                                | 3                     | 210        | 10            | 2799        | 0.085        | 1                | 123       | 2         | 87        | 0.771        |
| 0009987 | cellular process                                                                  | 111                   | 102        | 1550          | 1259        | 0.426        | <b>57</b>        | <b>67</b> | <b>54</b> | <b>35</b> | <b>0.048</b> |
| 0007154 | cell communication                                                                | 34                    | 179        | 453           | 2356        | 0.973        | 18               | 106       | 16        | 73        | 0.624        |
| 0007155 | cell adhesion                                                                     | 7                     | 206        | 78            | 2731        | 0.827        | 7                | 117       | 0         | 89        | 0.059        |
| 0008037 | cell recognition                                                                  | 0                     | 213        | 2             | 2807        | 0.321        | 0                | 124       | 0         | 89        | -            |
| 0008038 | neuronal cell recognition                                                         | 0                     | 213        | 2             | 2807        | 0.321        | 0                | 124       | 0         | 89        | -            |
| 0016337 | cell-cell adhesion                                                                | 4                     | 209        | 31            | 2778        | 0.493        | 4                | 120       | 0         | 89        | 0.231        |
| 0016339 | calcium-dependent cell-cell adhesion                                              | <b>2</b>              | <b>211</b> | <b>2</b>      | <b>2807</b> | <b>0.017</b> | 2                | 122       | 0         | 89        | 0.629        |
| 0007156 | homophilic cell adhesion                                                          | <b>3</b>              | <b>210</b> | <b>3</b>      | <b>2806</b> | <b>9E-04</b> | 3                | 121       | 0         | 89        | 0.374        |
| 0007160 | cell-matrix adhesion                                                              | 1                     | 212        | 8             | 2801        | 0.861        | 1                | 123       | 0         | 89        | 0.867        |
| 0007267 | cell-cell signaling                                                               | 13                    | 200        | 141           | 2668        | 0.595        | 5                | 119       | 8         | 81        | 0.23         |
| 0019226 | transmission of nerve impulse                                                     | 13                    | 200        | 123           | 2686        | 0.318        | 5                | 119       | 8         | 81        | 0.23         |
| 0007268 | synaptic transmission                                                             | 10                    | 203        | 91            | 2718        | 0.346        | 4                | 120       | 6         | 83        | 0.385        |
| 0007270 | nerve-nerve synaptic transmission                                                 | 1                     | 212        | 15            | 2794        | 0.715        | 0                | 124       | 1         | 88        | 0.867        |
| 0001505 | regulation of neurotransmitter levels                                             | 7                     | 206        | 53            | 2756        | 0.247        | 4                | 120       | 3         | 86        | 0.741        |
| 0042133 | neurotransmitter metabolism                                                       | 1                     | 212        | 7             | 2802        | 0.93         | 0                | 124       | 1         | 88        | 0.867        |
| 0007269 | neurotransmitter secretion                                                        | 6                     | 207        | 47            | 2762        | 0.339        | 4                | 120       | 2         | 87        | 0.995        |
| 0007165 | signal transduction                                                               | 22                    | 191        | 355           | 2454        | 0.381        | 12               | 112       | 10        | 79        | 0.888        |
| 0007166 | cell surface receptor linked signal transduction                                  | 9                     | 204        | 147           | 2662        | 0.631        | 4                | 120       | 5         | 84        | 0.61         |
| 0007167 | enzyme linked receptor protein signaling pathway                                  | 3                     | 210        | 42            | 2767        | 0.847        | 1                | 123       | 2         | 87        | 0.771        |
| 0007178 | transmembrane receptor protein serine/threonine kinase signaling pathway          | 0                     | 213        | 15            | 2794        | 0.573        | 0                | 124       | 0         | 89        | -            |
| 0007179 | transforming growth factor beta receptor signaling pathway                        | 0                     | 213        | 9             | 2800        | 0.861        | 0                | 124       | 0         | 89        | -            |
| 0007169 | transmembrane receptor protein tyrosine kinase signaling pathway                  | 3                     | 210        | 28            | 2781        | 0.824        | 1                | 123       | 2         | 87        | 0.771        |
| 0007173 | epidermal growth factor receptor signaling pathway                                | 1                     | 212        | 6             | 2803        | 0.992        | 0                | 124       | 1         | 88        | 0.867        |
| 0008286 | insulin receptor signaling pathway                                                | 0                     | 213        | 4             | 2805        | 0.67         | 0                | 124       | 0         | 89        | -            |
| 0008293 | torso signaling pathway                                                           | 1                     | 212        | 6             | 2803        | 0.992        | 0                | 124       | 1         | 88        | 0.867        |
| 0007186 | G-protein coupled receptor protein signaling pathway                              | 3                     | 210        | 68            | 2741        | 0.48         | 1                | 123       | 2         | 87        | 0.771        |
| 0007200 | G-protein signaling, coupled to IP3 second messenger (phospholipase C activating) | 1                     | 212        | 4             | 2805        | 0.796        | 0                | 124       | 1         | 88        | 0.867        |
| 0007219 | Notch signaling pathway                                                           | 0                     | 213        | 13            | 2796        | 0.651        | 0                | 124       | 0         | 89        | -            |
| 0007224 | smoothened signaling pathway                                                      | 0                     | 213        | 6             | 2803        | 0.902        | 0                | 124       | 0         | 89        | -            |
| 0008063 | Toll signaling pathway                                                            | 1                     | 212        | 3             | 2806        | 0.67         | 1                | 123       | 0         | 89        | 0.867        |
| 0016055 | Wnt receptor signaling pathway                                                    | 2                     | 211        | 12            | 2797        | 0.591        | 1                | 123       | 1         | 88        | 0.629        |
| 0007242 | intracellular signaling cascade                                                   | 11                    | 202        | 175           | 2634        | 0.634        | 5                | 119       | 6         | 83        | 0.57         |
| 0007263 | nitric oxide mediated signal transduction                                         | 0                     | 213        | 3             | 2806        | 0.515        | 0                | 124       | 0         | 89        | -            |
| 0007243 | protein kinase cascade                                                            | 2                     | 211        | 42            | 2767        | 0.721        | 1                | 123       | 1         | 88        | 0.629        |
| 0007259 | JAK-STAT cascade                                                                  | 0                     | 213        | 6             | 2803        | 0.902        | 0                | 124       | 0         | 89        | -            |
| 0000165 | MAPKK cascade                                                                     | 2                     | 211        | 33            | 2776        | 0.982        | 1                | 123       | 1         | 88        | 0.629        |
| 0019932 | second-messenger-mediated signaling                                               | 1                     | 212        | 21            | 2788        | 0.966        | 0                | 124       | 1         | 88        | 0.867        |
| 0019722 | calcium-mediated signaling                                                        | 0                     | 213        | 15            | 2794        | 0.573        | 0                | 124       | 0         | 89        | -            |
| 0048015 | phosphoinositide-mediated signaling                                               | 1                     | 212        | 4             | 2805        | 0.796        | 0                | 124       | 1         | 88        | 0.867        |
| 0007264 | small GTPase mediated signal transduction                                         | 1                     | 212        | 44            | 2765        | 0.327        | 0                | 124       | 1         | 88        | 0.867        |
| 0007265 | Ras protein signal transduction                                                   | 0                     | 213        | 11            | 2798        | 0.745        | 0                | 124       | 0         | 89        | -            |
| 0009966 | regulation of signal transduction                                                 | 2                     | 211        | 30            | 2779        | 0.865        | 1                | 123       | 1         | 88        | 0.629        |
| 0007275 | development                                                                       | 32                    | 181        | 422           | 2387        | 0.921        | 15               | 109       | 17        | 72        | 0.224        |
| 0007568 | aging                                                                             | 0                     | 213        | 11            | 2798        | 0.745        | 0                | 124       | 0         | 89        | -            |
| 0030154 | cell differentiation                                                              | 4                     | 209        | 109           | 2700        | 0.194        | 1                | 123       | 3         | 86        | 0.396        |
| 0048468 | cell development                                                                  | 2                     | 211        | 68            | 2741        | 0.25         | 1                | 123       | 1         | 88        | 0.629        |
| 0000904 | cellular morphogenesis during differentiation                                     | 1                     | 212        | 17            | 2792        | 0.831        | 0                | 124       | 1         | 88        | 0.867        |
| 0042461 | photoreceptor cell development                                                    | 1                     | 212        | 17            | 2792        | 0.831        | 0                | 124       | 1         | 88        | 0.867        |
| 0042051 | eye photoreceptor development (sensu Endopterygota)                               | 1                     | 212        | 16            | 2793        | 0.774        | 0                | 124       | 1         | 88        | 0.867        |
| 0045165 | cell fate commitment                                                              | 1                     | 212        | 45            | 2764        | 0.312        | 0                | 124       | 1         | 88        | 0.867        |

| GO#     | GO term                                                        | Representational bias |            |               |             |              | Directional bias |            |           |           |              |
|---------|----------------------------------------------------------------|-----------------------|------------|---------------|-------------|--------------|------------------|------------|-----------|-----------|--------------|
|         |                                                                | regulated             |            | not regulated |             | $\rho$       | up-reg.          |            | down-reg. |           | $\rho$       |
|         |                                                                | term                  | n.term     | term          | n.term      |              | term             | n.term     | term      | n.term    |              |
| 0001709 | cell fate determination                                        | 0                     | 213        | 28            | 2781        | 0.274        | 0                | 124        | 0         | 89        | -            |
| 0007400 | neuroblast cell fate determination                             | 0                     | 213        | 8             | 2801        | 0.93         | 0                | 124        | 0         | 89        | -            |
| 0001708 | cell fate specification                                        | 0                     | 213        | 7             | 2802        | 0.992        | 0                | 124        | 0         | 89        | -            |
| 0007349 | cellularization                                                | 0                     | 213        | 10            | 2799        | 0.8          | 0                | 124        | 0         | 89        | -            |
| 0040007 | growth                                                         | 3                     | 210        | 33            | 2776        | 0.98         | 1                | 123        | 2         | 87        | 0.771        |
| 0002164 | larval development                                             | 2                     | 211        | 15            | 2794        | 0.774        | 1                | 123        | 1         | 88        | 0.629        |
| 0002165 | larval or pupal development (sensu Insecta)                    | 14                    | 199        | 111           | 2698        | 0.094        | 5                | 119        | 9         | 80        | 0.137        |
| 0007552 | metamorphosis                                                  | 14                    | 199        | 103           | 2706        | 0.053        | 5                | 119        | 9         | 80        | 0.137        |
| 0009653 | morphogenesis                                                  | 24                    | 189        | 292           | 2517        | 0.776        | 11               | 113        | 13        | 76        | 0.277        |
| 0002009 | morphogenesis of an epithelium                                 | 2                     | 211        | 38            | 2771        | 0.843        | 2                | 122        | 0         | 89        | 0.629        |
| 0009887 | organogenesis                                                  | 21                    | 192        | 261           | 2548        | 0.879        | 8                | 116        | 13        | 76        | 0.083        |
| 0001654 | eye morphogenesis                                              | 4                     | 209        | 51            | 2758        | 0.841        | 0                | 124        | 4         | 85        | 0.061        |
| 0008406 | gonad development                                              | 0                     | 213        | 10            | 2799        | 0.8          | 0                | 124        | 0         | 89        | -            |
| 0007444 | imaginal disc development                                      | 9                     | 204        | 82            | 2727        | 0.386        | 2                | 122        | 7         | 82        | 0.059        |
| 0007494 | midgut development                                             | 0                     | 213        | 4             | 2805        | 0.67         | 0                | 124        | 0         | 89        | -            |
| 0007517 | muscle development                                             | 1                     | 212        | 32            | 2777        | 0.572        | 1                | 123        | 0         | 89        | 0.867        |
| 0007399 | neurogenesis                                                   | 7                     | 206        | 158           | 2651        | 0.196        | 3                | 121        | 4         | 85        | 0.654        |
| 0007409 | axonogenesis                                                   | 1                     | 212        | 46            | 2763        | 0.298        | 0                | 124        | 1         | 88        | 0.867        |
| 0007411 | axon guidance                                                  | 1                     | 212        | 34            | 2775        | 0.521        | 0                | 124        | 1         | 88        | 0.867        |
| 0007417 | central nervous system development                             | 1                     | 212        | 38            | 2771        | 0.432        | 0                | 124        | 1         | 88        | 0.867        |
| 0016358 | dendrite morphogenesis                                         | 0                     | 213        | 14            | 2795        | 0.61         | 0                | 124        | 0         | 89        | -            |
| 0042063 | gliogenesis                                                    | 0                     | 213        | 11            | 2798        | 0.745        | 0                | 124        | 0         | 89        | -            |
| 0007422 | peripheral nervous system development                          | 2                     | 211        | 38            | 2771        | 0.843        | 0                | 124        | 2         | 87        | 0.339        |
| 0050767 | regulation of neurogenesis                                     | 1                     | 212        | 5             | 2804        | 0.902        | 0                | 124        | 1         | 88        | 0.867        |
| 0007424 | tracheal system development (sensu Insecta)                    | 1                     | 212        | 34            | 2775        | 0.521        | 0                | 124        | 1         | 88        | 0.867        |
| 0048513 | organ development                                              | 21                    | 192        | 265           | 2544        | 0.934        | 8                | 116        | 13        | 76        | 0.083        |
| 0007389 | pattern specification                                          | 4                     | 209        | 68            | 2741        | 0.789        | 3                | 121        | 1         | 88        | 0.861        |
| 0048066 | pigmentation                                                   | 0                     | 213        | 10            | 2799        | 0.8          | 0                | 124        | 0         | 89        | -            |
| 0009791 | post-embryonic development                                     | 2                     | 211        | 15            | 2794        | 0.774        | 1                | 123        | 1         | 88        | 0.629        |
| 0009790 | embryonic development                                          | 6                     | 207        | 93            | 2716        | 0.849        | 4                | 120        | 2         | 87        | 0.995        |
| 0007530 | sex determination                                              | 0                     | 213        | 10            | 2799        | 0.8          | 0                | 124        | 0         | 89        | -            |
| 0007548 | sex differentiation                                            | 0                     | 213        | 18            | 2791        | 0.478        | 0                | 124        | 0         | 89        | -            |
| 0019827 | stem cell maintenance                                          | 0                     | 213        | 8             | 2801        | 0.93         | 0                | 124        | 0         | 89        | -            |
| 0000003 | reproduction                                                   | 6                     | 207        | 128           | 2681        | 0.309        | 2                | 122        | 4         | 85        | 0.404        |
| 0050793 | regulation of development                                      | 3                     | 210        | 40            | 2769        | 0.778        | 0                | 124        | 3         | 86        | 0.142        |
| 0007582 | physiological process                                          | 114                   | 99         | 1525          | 1284        | 0.884        | 59               | 65         | 55        | 34        | 0.056        |
| 0008152 | metabolism                                                     | 86                    | 127        | 1116          | 1693        | 0.91         | 43               | 81         | 43        | 46        | 0.063        |
| 0009056 | catabolism                                                     | 14                    | 199        | 189           | 2620        | 0.957        | 9                | 115        | 5         | 84        | 0.845        |
| 0006091 | energy pathways                                                | 7                     | 206        | 101           | 2708        | 0.966        | 7                | 117        | 0         | 89        | 0.059        |
| 0006118 | electron transport                                             | 4                     | 209        | 52            | 2757        | 0.814        | 4                | 120        | 0         | 89        | 0.231        |
| 0006139 | nucleobase, nucleoside, nucleotide and nucleic acid metabolism | 25                    | 188        | 409           | 2400        | 0.302        | 14               | 110        | 11        | 78        | 0.981        |
| 0006259 | DNA metabolism                                                 | 1                     | 212        | 79            | 2730        | 0.067        | 0                | 124        | 1         | 88        | 0.867        |
| 0006350 | transcription                                                  | 12                    | 201        | 213           | 2596        | 0.363        | 6                | 118        | 6         | 83        | 0.77         |
| 0043170 | macromolecule metabolism                                       | 55                    | 158        | 606           | 2203        | 0.174        | 28               | 96         | 27        | 62        | 0.264        |
| 0019538 | protein metabolism                                             | 48                    | 165        | 510           | 2299        | 0.135        | 23               | 101        | 25        | 64        | 0.14         |
| 0006412 | protein biosynthesis                                           | 14                    | 199        | 129           | 2680        | 0.252        | 10               | 114        | 4         | 85        | 0.449        |
| 0006464 | protein modification                                           | 18                    | 195        | 239           | 2570        | 0.922        | 8                | 116        | 10        | 79        | 0.323        |
| 0006457 | protein folding                                                | <b>10</b>             | <b>203</b> | <b>34</b>     | <b>2775</b> | <b>1E-04</b> | <b>0</b>         | <b>124</b> | <b>10</b> | <b>79</b> | <b>5E-04</b> |
| 0005975 | carbohydrate metabolism                                        | 8                     | 205        | 100           | 2709        | 0.966        | 5                | 119        | 3         | 86        | 0.909        |
| 0006519 | amino acid and derivative metabolism                           | 7                     | 206        | 64            | 2745        | 0.483        | 1                | 123        | 6         | 83        | 0.045        |
| 0006629 | lipid metabolism                                               | 4                     | 209        | 89            | 2720        | 0.398        | 3                | 121        | 1         | 88        | 0.861        |
| 0009308 | amine metabolism                                               | 7                     | 206        | 74            | 2735        | 0.728        | 1                | 123        | 6         | 83        | 0.045        |
| 0042440 | pigment metabolism                                             | 0                     | 213        | 12            | 2797        | 0.696        | 0                | 124        | 0         | 89        | -            |
| 0042445 | hormone metabolism                                             | 2                     | 211        | 5             | 2804        | 0.137        | 1                | 123        | 1         | 88        | 0.629        |
| 0009058 | biosynthesis                                                   | 21                    | 192        | 221           | 2588        | 0.367        | 14               | 110        | 7         | 82        | 0.553        |
| 0019748 | secondary metabolism                                           | 0                     | 213        | 14            | 2795        | 0.61         | 0                | 124        | 0         | 89        | -            |
| 0019222 | regulation of metabolism                                       | 12                    | 201        | 222           | 2587        | 0.288        | 6                | 118        | 6         | 83        | 0.77         |
| 0016265 | death                                                          | 8                     | 205        | 80            | 2729        | 0.583        | 2                | 122        | 6         | 83        | 0.115        |
| 0008219 | cell death                                                     | 8                     | 205        | 68            | 2741        | 0.331        | 2                | 122        | 6         | 83        | 0.115        |
| 0016271 | tissue death                                                   | 4                     | 209        | 23            | 2786        | 0.228        | 1                | 123        | 3         | 86        | 0.396        |
| 0042592 | homeostasis                                                    | 1                     | 212        | 28            | 2781        | 0.692        | 0                | 124        | 1         | 88        | 0.867        |
| 0019725 | cell homeostasis                                               | 1                     | 212        | 25            | 2784        | 0.798        | 0                | 124        | 1         | 88        | 0.867        |
| 0050801 | ion homeostasis                                                | 1                     | 212        | 12            | 2797        | 0.651        | 0                | 124        | 1         | 88        | 0.867        |
| 0043062 | extracellular structure organization and biogenesis            | 0                     | 213        | 19            | 2790        | 0.451        | 0                | 124        | 0         | 89        | -            |
| 0046903 | secretion                                                      | 10                    | 203        | 92            | 2717        | 0.363        | 7                | 117        | 3         | 86        | 0.656        |
| 0048511 | rhythmic process                                               | 3                     | 210        | 13            | 2796        | 0.179        | 1                | 123        | 2         | 87        | 0.771        |

| GO#     | GO term                                                       | Representational bias |            |               |             |              | Directional bias |            |           |           |              |
|---------|---------------------------------------------------------------|-----------------------|------------|---------------|-------------|--------------|------------------|------------|-----------|-----------|--------------|
|         |                                                               | regulated             |            | not regulated |             | $\rho$       | up-reg.          |            | down-reg. |           | $\rho$       |
|         |                                                               | term                  | n.term     | term          | n.term      |              | term             | n.term     | term      | n.term    |              |
| 0050791 | regulation of physiological process                           | 21                    | 192        | 326           | 2483        | 0.51         | 9                | 115        | 12        | 77        | 0.204        |
| 0050874 | organismal physiological process                              | 22                    | 191        | 206           | 2603        | 0.144        | 11               | 113        | 11        | 78        | 0.551        |
| 0050875 | cellular physiological process                                | 105                   | 108        | 1448          | 1361        | 0.573        | <b>53</b>        | <b>71</b>  | <b>52</b> | <b>37</b> | <b>0.034</b> |
| 0006810 | transport                                                     | 29                    | 184        | 372           | 2437        | 0.961        | 16               | 108        | 13        | 76        | 0.877        |
| 0006811 | ion transport                                                 | 11                    | 202        | 109           | 2700        | 0.457        | 6                | 118        | 5         | 84        | 0.952        |
| 0006818 | hydrogen transport                                            | 3                     | 210        | 16            | 2793        | 0.297        | 3                | 121        | 0         | 89        | 0.374        |
| 0006836 | neurotransmitter transport                                    | 0                     | 213        | 6             | 2803        | 0.902        | 0                | 124        | 0         | 89        | -            |
| 0006858 | extracellular transport                                       | 1                     | 212        | 14            | 2795        | 0.654        | 0                | 124        | 1         | 88        | 0.867        |
| 0006869 | lipid transport                                               | 0                     | 213        | 17            | 2792        | 0.507        | 0                | 124        | 0         | 89        | -            |
| 0008643 | carbohydrate transport                                        | 3                     | 210        | 12            | 2797        | 0.145        | 2                | 122        | 1         | 88        | 0.771        |
| 0015031 | protein transport                                             | 8                     | 205        | 171           | 2638        | 0.215        | 5                | 119        | 3         | 86        | 0.909        |
| 0015837 | amine transport                                               | 2                     | 211        | 11            | 2798        | 0.526        | 1                | 123        | 1         | 88        | 0.629        |
| 0015931 | nucleobase, nucleoside, nucleotide and nucleic acid transport | 2                     | 211        | 12            | 2797        | 0.591        | 1                | 123        | 1         | 88        | 0.629        |
| 0016192 | vesicle-mediated transport                                    | 8                     | 205        | 112           | 2697        | 0.988        | 5                | 119        | 3         | 86        | 0.909        |
| 0045045 | secretory pathway                                             | 8                     | 205        | 88            | 2721        | 0.766        | 5                | 119        | 3         | 86        | 0.909        |
| 0046907 | intracellular transport                                       | 11                    | 202        | 188           | 2621        | 0.469        | 7                | 117        | 4         | 85        | 0.952        |
| 0051049 | regulation of transport                                       | <b>4</b>              | <b>209</b> | <b>14</b>     | <b>2795</b> | <b>0.039</b> | 2                | 122        | 2         | 87        | 0.861        |
| 0008283 | cell proliferation                                            | 7                     | 206        | 65            | 2744        | 0.507        | 3                | 121        | 4         | 85        | 0.654        |
| 0007049 | cell cycle                                                    | 10                    | 203        | 121           | 2688        | 0.926        | 4                | 120        | 6         | 83        | 0.385        |
| 0017145 | stem cell division                                            | 0                     | 213        | 12            | 2797        | 0.696        | 0                | 124        | 0         | 89        | -            |
| 0016043 | cell organization and biogenesis                              | 13                    | 200        | 261           | 2548        | 0.15         | 5                | 119        | 8         | 81        | 0.23         |
| 0000902 | cellular morphogenesis                                        | 4                     | 209        | 70            | 2739        | 0.742        | 1                | 123        | 3         | 86        | 0.396        |
| 0006996 | organelle organization and biogenesis                         | 10                    | 203        | 228           | 2581        | 0.098        | 4                | 120        | 6         | 83        | 0.385        |
| 0007010 | cytoskeleton organization and biogenesis                      | 7                     | 206        | 159           | 2650        | 0.19         | 3                | 121        | 4         | 85        | 0.654        |
| 0006997 | nuclear organization and biogenesis                           | 0                     | 213        | 9             | 2800        | 0.861        | 0                | 124        | 0         | 89        | -            |
| 0007028 | cytoplasm organization and biogenesis                         | 0                     | 213        | 17            | 2792        | 0.507        | 0                | 124        | 0         | 89        | -            |
| 0016044 | membrane organization and biogenesis                          | 0                     | 213        | 8             | 2801        | 0.93         | 0                | 124        | 0         | 89        | -            |
| 0051128 | regulation of cell organization and biogenesis                | 0                     | 213        | 12            | 2797        | 0.696        | 0                | 124        | 0         | 89        | -            |
| 0016049 | cell growth                                                   | 0                     | 213        | 9             | 2800        | 0.861        | 0                | 124        | 0         | 89        | -            |
| 0050896 | response to stimulus                                          | <b>22</b>             | <b>191</b> | <b>154</b>    | <b>2655</b> | <b>0.006</b> | <b>8</b>         | <b>116</b> | <b>14</b> | <b>75</b> | <b>0.049</b> |
| 0006950 | response to stress                                            | <b>10</b>             | <b>203</b> | <b>48</b>     | <b>2761</b> | <b>0.005</b> | <b>1</b>         | <b>123</b> | <b>9</b>  | <b>80</b> | <b>0.005</b> |
| 0009408 | response to heat                                              | <b>3</b>              | <b>210</b> | <b>8</b>      | <b>2801</b> | <b>0.042</b> | 0                | 124        | 3         | 86        | 0.142        |
| 0006979 | response to oxidative stress                                  | 0                     | 213        | 2             | 2807        | 0.321        | 0                | 124        | 0         | 89        | -            |
| 0051179 | localization                                                  | 30                    | 183        | 399           | 2410        | 0.957        | 17               | 107        | 13        | 76        | 0.989        |
| 0006403 | RNA localization                                              | 1                     | 212        | 28            | 2781        | 0.692        | 1                | 123        | 0         | 89        | 0.867        |
| 0008104 | protein localization                                          | 9                     | 204        | 183           | 2626        | 0.24         | 6                | 118        | 3         | 86        | 0.857        |
| 0051234 | establishment of localization                                 | 30                    | 183        | 376           | 2433        | 0.854        | 17               | 107        | 13        | 76        | 0.989        |
| 0051235 | maintenance of localization                                   | 0                     | 213        | 3             | 2806        | 0.515        | 0                | 124        | 0         | 89        | -            |
| 0050789 | regulation of biological process                              | 23                    | 190        | 379           | 2430        | 0.312        | 10               | 114        | 13        | 76        | 0.196        |
| 0050790 | regulation of enzyme activity                                 | 0                     | 213        | 15            | 2794        | 0.573        | 0                | 124        | 0         | 89        | -            |
| 0040029 | regulation of gene expression, epigenetic                     | 0                     | 213        | 20            | 2789        | 0.425        | 0                | 124        | 0         | 89        | -            |
| 0006306 | DNA methylation                                               | 0                     | 213        | 7             | 2802        | 0.992        | 0                | 124        | 0         | 89        | -            |
| 0045814 | negative regulation of gene expression, epigenetic            | 0                     | 213        | 7             | 2802        | 0.992        | 0                | 124        | 0         | 89        | -            |
| 0006342 | chromatin silencing                                           | 0                     | 213        | 7             | 2802        | 0.992        | 0                | 124        | 0         | 89        | -            |
| 0003674 | molecular_function                                            | 122                   | 91         | 1642          | 1167        | 0.792        | <b>63</b>        | <b>61</b>  | <b>59</b> | <b>30</b> | <b>0.035</b> |
| 0016209 | antioxidant activity                                          | 0                     | 213        | 8             | 2801        | 0.93         | 0                | 124        | 0         | 89        | -            |
| 0005488 | binding                                                       | 66                    | 147        | 976           | 1833        | 0.299        | <b>31</b>        | <b>93</b>  | <b>35</b> | <b>54</b> | <b>0.038</b> |
| 0005509 | calcium ion binding                                           | 4                     | 209        | 54            | 2755        | 0.831        | 3                | 121        | 1         | 88        | 0.861        |
| 0030246 | carbohydrate binding                                          | 0                     | 213        | 14            | 2795        | 0.61         | 0                | 124        | 0         | 89        | -            |
| 0008289 | lipid binding                                                 | 3                     | 210        | 23            | 2786        | 0.608        | 1                | 123        | 2         | 87        | 0.771        |
| 0003676 | nucleic acid binding                                          | 23                    | 190        | 401           | 2408        | 0.191        | 13               | 111        | 10        | 79        | 0.961        |
| 0003677 | DNA binding                                                   | 12                    | 201        | 183           | 2626        | 0.719        | 6                | 118        | 6         | 83        | 0.77         |
| 0003682 | chromatin binding                                             | 1                     | 212        | 23            | 2786        | 0.878        | 0                | 124        | 1         | 88        | 0.867        |
| 0003700 | transcription factor activity                                 | 5                     | 208        | 82            | 2727        | 0.788        | 2                | 122        | 3         | 86        | 0.706        |
| 0003723 | RNA binding                                                   | 5                     | 208        | 118           | 2691        | 0.254        | 2                | 122        | 3         | 86        | 0.706        |
| 0008135 | translation factor activity, nucleic acid binding             | 1                     | 212        | 33            | 2776        | 0.546        | 0                | 124        | 1         | 88        | 0.867        |
| 0000166 | nucleotide binding                                            | 17                    | 196        | 239           | 2570        | 0.89         | <b>5</b>         | <b>119</b> | <b>12</b> | <b>77</b> | <b>0.024</b> |
| 0005515 | protein binding                                               | 22                    | 191        | 360           | 2449        | 0.344        | 9                | 115        | 13        | 76        | 0.131        |
| 0008134 | transcription factor binding                                  | 2                     | 211        | 27            | 2782        | 0.74         | 1                | 123        | 1         | 88        | 0.629        |
| 0008092 | cytoskeletal protein binding                                  | 4                     | 209        | 85            | 2724        | 0.456        | 3                | 121        | 1         | 88        | 0.861        |
| 0003779 | actin binding                                                 | 2                     | 211        | 52            | 2757        | 0.484        | 1                | 123        | 1         | 88        | 0.629        |
| 0003824 | catalytic activity                                            | 66                    | 147        | 774           | 2035        | 0.318        | 34               | 90         | 32        | 57        | 0.239        |
| 0016787 | hydrolase activity                                            | 29                    | 184        | 331           | 2478        | 0.493        | 16               | 108        | 13        | 76        | 0.877        |
| 0003924 | GTPase activity                                               | 2                     | 211        | 34            | 2775        | 0.98         | 0                | 124        | 2         | 87        | 0.339        |
| 0004518 | nuclease activity                                             | 0                     | 213        | 14            | 2795        | 0.61         | 0                | 124        | 0         | 89        | -            |



## cAMP (p &lt; 0.01)

| GO#     | GO term                                    | Representational bias |        |               |        |        | Directional bias |        |           |        |        |
|---------|--------------------------------------------|-----------------------|--------|---------------|--------|--------|------------------|--------|-----------|--------|--------|
|         |                                            | regulated             |        | not regulated |        | $\rho$ | up-reg.          |        | down-reg. |        | $\rho$ |
|         |                                            | term                  | n.term | term          | n.term |        | term             | n.term | term      | n.term |        |
| 0008233 | peptidase activity                         | 11                    | 202    | 102           | 2707   | 0.342  | 7                | 117    | 4         | 85     | 0.952  |
| 0004721 | phosphoprotein phosphatase activity        | 2                     | 211    | 27            | 2782   | 0.74   | 1                | 123    | 1         | 88     | 0.629  |
| 0016740 | transferase activity                       | 21                    | 192    | 226           | 2583   | 0.423  | 10               | 114    | 11        | 78     | 0.421  |
| 0016301 | kinase activity                            | 9                     | 204    | 131           | 2678   | 0.901  | 4                | 120    | 5         | 84     | 0.61   |
| 0004672 | protein kinase activity                    | 6                     | 207    | 90            | 2719   | 0.914  | 3                | 121    | 3         | 86     | 0.995  |
| 0030234 | enzyme regulator activity                  | 4                     | 209    | 107           | 2702   | 0.209  | 2                | 122    | 2         | 87     | 0.861  |
| 0003774 | motor activity                             | 2                     | 211    | 25            | 2784   | 0.761  | 2                | 122    | 0         | 89     | 0.629  |
| 0004871 | signal transducer activity                 | 12                    | 201    | 239           | 2570   | 0.181  | 7                | 117    | 5         | 84     | 0.77   |
| 0004872 | receptor activity                          | 5                     | 208    | 99            | 2710   | 0.476  | 3                | 121    | 2         | 87     | 0.706  |
| 0004879 | ligand-dependent nuclear receptor activity | 0                     | 213    | 9             | 2800   | 0.861  | 0                | 124    | 0         | 89     | -      |
| 0004888 | transmembrane receptor activity            | 3                     | 210    | 68            | 2741   | 0.48   | 2                | 122    | 1         | 88     | 0.771  |
| 0004930 | G-protein coupled receptor activity        | 0                     | 213    | 29            | 2780   | 0.26   | 0                | 124    | 0         | 89     | -      |
| 0005057 | receptor signaling protein activity        | 4                     | 209    | 78            | 2731   | 0.576  | 1                | 123    | 3         | 86     | 0.396  |
| 0005102 | receptor binding                           | 3                     | 210    | 64            | 2745   | 0.555  | 3                | 121    | 0         | 89     | 0.374  |
| 0005198 | structural molecule activity               | 16                    | 197    | 178           | 2631   | 0.596  | 13               | 111    | 3         | 86     | 0.093  |
| 0030528 | transcription regulator activity           | 9                     | 204    | 189           | 2620   | 0.201  | 4                | 120    | 5         | 84     | 0.61   |
| 0045182 | translation regulator activity             | 1                     | 212    | 33            | 2776   | 0.546  | 0                | 124    | 1         | 88     | 0.867  |
| 0005215 | transporter activity                       | 22                    | 191    | 229           | 2580   | 0.327  | 13               | 111    | 9         | 80     | 0.888  |
| 0005489 | electron transporter activity              | 2                     | 211    | 27            | 2782   | 0.74   | 2                | 122    | 0         | 89     | 0.629  |
| 0005216 | ion channel activity                       | 3                     | 210    | 48            | 2761   | 0.958  | 0                | 124    | 3         | 86     | 0.142  |
| 0005244 | voltage-gated ion channel activity         | 1                     | 212    | 25            | 2784   | 0.798  | 0                | 124    | 1         | 88     | 0.867  |
| 0005575 | cellular_component                         | 81                    | 132    | 1168          | 1641   | 0.346  | 49               | 75     | 32        | 57     | 0.7    |
| 0005623 | cell                                       | 75                    | 138    | 1068          | 1741   | 0.458  | 46               | 78     | 29        | 60     | 0.593  |
| 0005622 | intracellular                              | 58                    | 155    | 837           | 1972   | 0.476  | 36               | 88     | 22        | 67     | 0.588  |
| 0005737 | cytoplasm                                  | 36                    | 177    | 456           | 2353   | 0.874  | 26               | 98     | 10        | 79     | 0.092  |
| 0016023 | cytoplasmic vesicle                        | 3                     | 210    | 40            | 2769   | 0.778  | 2                | 122    | 1         | 88     | 0.771  |
| 0005829 | cytosol                                    | 8                     | 205    | 104           | 2705   | 0.882  | 6                | 118    | 2         | 87     | 0.538  |
| 0005783 | endoplasmic reticulum                      | 1                     | 212    | 56            | 2753   | 0.188  | 1                | 123    | 0         | 89     | 0.867  |
| 0005794 | Golgi apparatus                            | 4                     | 209    | 22            | 2787   | 0.199  | 3                | 121    | 1         | 88     | 0.861  |
| 0005815 | microtubule organizing center              | 1                     | 212    | 8             | 2801   | 0.861  | 0                | 124    | 1         | 88     | 0.867  |
| 0005739 | mitochondrion                              | 7                     | 206    | 102           | 2707   | 0.944  | 4                | 120    | 3         | 86     | 0.741  |
| 0005840 | ribosome                                   | 6                     | 207    | 51            | 2758   | 0.439  | 6                | 118    | 0         | 89     | 0.092  |
| 0005773 | vacuole                                    | 2                     | 211    | 14            | 2795   | 0.715  | 2                | 122    | 0         | 89     | 0.629  |
| 0005764 | lysosome                                   | 0                     | 213    | 6             | 2803   | 0.902  | 0                | 124    | 0         | 89     | -      |
| 0005856 | cytoskeleton                               | 8                     | 205    | 76            | 2733   | 0.495  | 6                | 118    | 2         | 87     | 0.538  |
| 0005694 | chromosome                                 | 2                     | 211    | 36            | 2773   | 0.909  | 1                | 123    | 1         | 88     | 0.629  |
| 0000228 | nuclear chromosome                         | 0                     | 213    | 5             | 2804   | 0.796  | 0                | 124    | 0         | 89     | -      |
| 0005634 | nucleus                                    | 23                    | 190    | 353           | 2456   | 0.518  | 10               | 114    | 13        | 76     | 0.196  |
| 0005635 | nuclear membrane                           | 1                     | 212    | 17            | 2792   | 0.831  | 1                | 123    | 0         | 89     | 0.867  |
| 0005730 | nucleolus                                  | 0                     | 213    | 11            | 2798   | 0.745  | 0                | 124    | 0         | 89     | -      |
| 0005654 | nucleoplasm                                | 4                     | 209    | 70            | 2739   | 0.742  | 1                | 123    | 3         | 86     | 0.396  |
| 0005777 | peroxisome                                 | 1                     | 212    | 8             | 2801   | 0.861  | 1                | 123    | 0         | 89     | 0.867  |
| 0005886 | plasma membrane                            | 4                     | 209    | 143           | 2666   | 0.053  | 2                | 122    | 2         | 87     | 0.861  |
| 0005576 | extracellular region                       | 4                     | 209    | 66            | 2743   | 0.838  | 3                | 121    | 1         | 88     | 0.861  |
| 0005578 | extracellular matrix (sensu Metazoa)       | 3                     | 210    | 32            | 2777   | 0.982  | 2                | 122    | 1         | 88     | 0.771  |

## cGMP vs. cAMP (p &lt; 0.01; "up" means higher in cGMP)

| GO#     | GO term                                                                           | Representational bias |            |               |             |              | Directional bias |            |           |            |              |
|---------|-----------------------------------------------------------------------------------|-----------------------|------------|---------------|-------------|--------------|------------------|------------|-----------|------------|--------------|
|         |                                                                                   | regulated             |            | not regulated |             | $\rho$       | up-reg.          |            | down-reg. |            | $\rho$       |
|         |                                                                                   | term                  | n.term     | term          | n.term      |              | term             | n.term     | term      | n.term     |              |
| 0008150 | biological_process                                                                | 255                   | 170        | 1534          | 1063        | 0.757        | 126              | 89         | 129       | 81         | 0.621        |
| 0007610 | behavior                                                                          | 24                    | 401        | 134           | 2463        | 0.764        | 15               | 200        | 9         | 201        | 0.321        |
| 0030534 | adult behavior                                                                    | 5                     | 420        | 18            | 2579        | 0.446        | 2                | 213        | 3         | 207        | 0.979        |
| 0030537 | larval behavior                                                                   | 1                     | 424        | 8             | 2589        | 0.822        | 0                | 215        | 1         | 209        | 0.991        |
| 0007611 | learning and/or memory                                                            | 3                     | 422        | 21            | 2576        | 0.941        | 1                | 214        | 2         | 208        | 0.984        |
| 0007612 | learning                                                                          | 2                     | 423        | 13            | 2584        | 0.771        | 1                | 214        | 1         | 209        | 0.489        |
| 0007613 | memory                                                                            | 2                     | 423        | 9             | 2588        | 0.967        | 1                | 214        | 1         | 209        | 0.489        |
| 0007626 | locomotory behavior                                                               | 19                    | 406        | 101           | 2496        | 0.663        | 11               | 204        | 8         | 202        | 0.677        |
| 0007635 | chemosensory behavior                                                             | 1                     | 424        | 16            | 2581        | 0.533        | 1                | 214        | 0         | 210        | 0.991        |
| 0007622 | rhythmic behavior                                                                 | 5                     | 420        | 9             | 2588        | 0.051        | 3                | 212        | 2         | 208        | 0.979        |
| 0048512 | circadian behavior                                                                | 4                     | 421        | 9             | 2588        | 0.181        | 2                | 213        | 2         | 208        | 0.632        |
| 0009987 | cellular process                                                                  | 236                   | 189        | 1425          | 1172        | 0.841        | 118              | 97         | 118       | 92         | 0.862        |
| 0007154 | cell communication                                                                | <b>88</b>             | <b>337</b> | <b>399</b>    | <b>2198</b> | <b>0.007</b> | <b>62</b>        | <b>153</b> | <b>26</b> | <b>184</b> | <b>5E-05</b> |
| 0007155 | cell adhesion                                                                     | 18                    | 407        | 67            | 2530        | 0.079        | 11               | 204        | 7         | 203        | 0.502        |
| 0008037 | cell recognition                                                                  | 1                     | 424        | 1             | 2596        | 0.656        | 1                | 214        | 0         | 210        | 0.991        |
| 0008038 | neuronal cell recognition                                                         | 1                     | 424        | 1             | 2596        | 0.656        | 1                | 214        | 0         | 210        | 0.991        |
| 0016337 | cell-cell adhesion                                                                | 8                     | 417        | 27            | 2570        | 0.207        | 4                | 211        | 4         | 206        | 0.746        |
| 0016339 | calcium-dependent cell-cell adhesion                                              | 2                     | 423        | 2             | 2595        | 0.177        | 1                | 214        | 1         | 209        | 0.489        |
| 0007156 | homophilic cell adhesion                                                          | 3                     | 422        | 3             | 2594        | 0.052        | 2                | 213        | 1         | 209        | 0.984        |
| 0007160 | cell-matrix adhesion                                                              | 3                     | 422        | 6             | 2591        | 0.236        | 1                | 214        | 2         | 208        | 0.984        |
| 0007267 | cell-cell signaling                                                               | 27                    | 398        | 127           | 2470        | 0.249        | <b>20</b>        | <b>195</b> | <b>7</b>  | <b>203</b> | <b>0.02</b>  |
| 0019226 | transmission of nerve impulse                                                     | 24                    | 401        | 112           | 2485        | 0.27         | <b>18</b>        | <b>197</b> | <b>6</b>  | <b>204</b> | <b>0.024</b> |
| 0007268 | synaptic transmission                                                             | 20                    | 405        | 81            | 2516        | 0.123        | <b>16</b>        | <b>199</b> | <b>4</b>  | <b>206</b> | <b>0.014</b> |
| 0007270 | nerve-nerve synaptic transmission                                                 | 2                     | 423        | 14            | 2583        | 0.857        | 2                | 213        | 0         | 210        | 0.489        |
| 0001505 | regulation of neurotransmitter levels                                             | 13                    | 412        | 47            | 2550        | 0.128        | 10               | 205        | 3         | 207        | 0.1          |
| 0042133 | neurotransmitter metabolism                                                       | 3                     | 422        | 5             | 2592        | 0.161        | 3                | 212        | 0         | 210        | 0.255        |
| 0007269 | neurotransmitter secretion                                                        | 10                    | 415        | 43            | 2554        | 0.415        | 7                | 208        | 3         | 207        | 0.356        |
| 0007165 | signal transduction                                                               | 65                    | 360        | 312           | 2285        | 0.069        | <b>43</b>        | <b>172</b> | <b>22</b> | <b>188</b> | <b>0.01</b>  |
| 0007166 | cell surface receptor linked signal transduction                                  | 22                    | 403        | 134           | 2463        | 0.917        | 16               | 199        | 6         | 204        | 0.056        |
| 0007167 | enzyme linked receptor protein signaling pathway                                  | 9                     | 416        | 36            | 2561        | 0.348        | 6                | 209        | 3         | 207        | 0.523        |
| 0007178 | transmembrane receptor protein serine/threonine kinase signaling pathway          | 2                     | 423        | 13            | 2584        | 0.771        | 1                | 214        | 1         | 209        | 0.489        |
| 0007179 | transforming growth factor beta receptor signaling pathway                        | 2                     | 423        | 7             | 2590        | 0.822        | 1                | 214        | 1         | 209        | 0.489        |
| 0007169 | transmembrane receptor protein tyrosine kinase signaling pathway                  | 7                     | 418        | 24            | 2573        | 0.266        | 5                | 210        | 2         | 208        | 0.465        |
| 0007173 | epidermal growth factor receptor signaling pathway                                | 2                     | 423        | 5             | 2592        | 0.575        | 1                | 214        | 1         | 209        | 0.489        |
| 0008286 | insulin receptor signaling pathway                                                | 0                     | 425        | 4             | 2593        | 0.928        | 0                | 215        | 0         | 210        | -            |
| 0008293 | torso signaling pathway                                                           | 2                     | 423        | 5             | 2592        | 0.575        | 1                | 214        | 1         | 209        | 0.489        |
| 0007186 | G-protein coupled receptor protein signaling pathway                              | 7                     | 418        | 64            | 2533        | 0.391        | 6                | 209        | 1         | 209        | 0.135        |
| 0007200 | G-protein signaling, coupled to IP3 second messenger (phospholipase C activating) | 1                     | 424        | 4             | 2593        | 0.794        | 1                | 214        | 0         | 210        | 0.991        |
| 0007219 | Notch signaling pathway                                                           | 3                     | 422        | 10            | 2587        | 0.591        | 1                | 214        | 2         | 208        | 0.984        |
| 0007224 | smoothened signaling pathway                                                      | 0                     | 425        | 6             | 2591        | 0.686        | 0                | 215        | 0         | 210        | -            |
| 0008063 | Toll signaling pathway                                                            | 1                     | 424        | 3             | 2594        | 0.928        | 1                | 214        | 0         | 210        | 0.991        |
| 0016055 | Wnt receptor signaling pathway                                                    | 3                     | 422        | 11            | 2586        | 0.682        | 2                | 213        | 1         | 209        | 0.984        |
| 0007242 | intracellular signaling cascade                                                   | <b>39</b>             | <b>386</b> | <b>147</b>    | <b>2450</b> | <b>0.007</b> | <b>28</b>        | <b>187</b> | <b>11</b> | <b>199</b> | <b>0.009</b> |
| 0007263 | nitric oxide mediated signal transduction                                         | 1                     | 424        | 2             | 2595        | 0.897        | 0                | 215        | 1         | 209        | 0.991        |
| 0007243 | protein kinase cascade                                                            | 10                    | 415        | 34            | 2563        | 0.148        | <b>9</b>         | <b>206</b> | <b>1</b>  | <b>209</b> | <b>0.028</b> |
| 0007259 | JAK-STAT cascade                                                                  | 1                     | 424        | 5             | 2592        | 0.686        | 1                | 214        | 0         | 210        | 0.991        |
| 0000165 | MAPKKK cascade                                                                    | 8                     | 417        | 27            | 2570        | 0.207        | 7                | 208        | 1         | 209        | 0.08         |
| 0019932 | second-messenger-mediated signaling                                               | 4                     | 421        | 18            | 2579        | 0.803        | 2                | 213        | 2         | 208        | 0.632        |
| 0019722 | calcium-mediated signaling                                                        | 2                     | 423        | 13            | 2584        | 0.771        | 0                | 215        | 2         | 208        | 0.468        |
| 0048015 | phosphoinositide-mediated signaling                                               | 1                     | 424        | 4             | 2593        | 0.794        | 1                | 214        | 0         | 210        | 0.991        |
| 0007264 | small GTPase mediated signal transduction                                         | 7                     | 418        | 38            | 2559        | 0.941        | 5                | 210        | 2         | 208        | 0.465        |
| 0007265 | Ras protein signal transduction                                                   | 2                     | 423        | 9             | 2588        | 0.967        | 2                | 213        | 0         | 210        | 0.489        |
| 0009966 | regulation of signal transduction                                                 | 8                     | 417        | 24            | 2573        | 0.125        | 6                | 209        | 2         | 208        | 0.3          |
| 0007275 | development                                                                       | <b>84</b>             | <b>341</b> | <b>370</b>    | <b>2227</b> | <b>0.004</b> | 49               | 166        | 35        | 175        | 0.143        |
| 0007568 | aging                                                                             | 2                     | 423        | 9             | 2588        | 0.967        | 1                | 214        | 1         | 209        | 0.489        |
| 0030154 | cell differentiation                                                              | 14                    | 411        | 99            | 2498        | 0.701        | 7                | 208        | 7         | 203        | 0.82         |
| 0048468 | cell development                                                                  | 7                     | 418        | 63            | 2534        | 0.415        | 4                | 211        | 3         | 207        | 0.975        |
| 0000904 | cellular morphogenesis during differentiation                                     | 2                     | 423        | 16            | 2581        | 0.983        | 2                | 213        | 0         | 210        | 0.489        |
| 0042461 | photoreceptor cell development                                                    | 2                     | 423        | 16            | 2581        | 0.983        | 2                | 213        | 0         | 210        | 0.489        |
| 0042051 | eye photoreceptor development (sensu Endopterygota)                               | 2                     | 423        | 15            | 2582        | 0.939        | 2                | 213        | 0         | 210        | 0.489        |
| 0045165 | cell fate commitment                                                              | 4                     | 421        | 42            | 2555        | 0.4          | 1                | 214        | 3         | 207        | 0.599        |

## cGMP vs. cAMP (p &lt; 0.01; "up" means higher in cGMP)

| GO#     | GO term                                                        | Representational bias |            |               |             |              | Directional bias |            |           |            |              |
|---------|----------------------------------------------------------------|-----------------------|------------|---------------|-------------|--------------|------------------|------------|-----------|------------|--------------|
|         |                                                                | regulated             |            | not regulated |             | $\rho$       | up-reg.          |            | down-reg. |            | $\rho$       |
|         |                                                                | term                  | n.term     | term          | n.term      |              | term             | n.term     | term      | n.term     |              |
| 0001709 | cell fate determination                                        | 2                     | 423        | 26            | 2571        | 0.432        | 1                | 214        | 1         | 209        | 0.489        |
| 0007400 | neuroblast cell fate determination                             | 1                     | 424        | 7             | 2590        | 0.703        | 1                | 214        | 0         | 210        | 0.991        |
| 0001708 | cell fate specification                                        | 0                     | 425        | 7             | 2590        | 0.598        | 0                | 215        | 0         | 210        | -            |
| 0007349 | cellularization                                                | 0                     | 425        | 10            | 2587        | 0.409        | 0                | 215        | 0         | 210        | -            |
| 0040007 | growth                                                         | 4                     | 421        | 32            | 2565        | 0.786        | 1                | 214        | 3         | 207        | 0.599        |
| 0002164 | larval development                                             | 2                     | 423        | 15            | 2582        | 0.939        | 1                | 214        | 1         | 209        | 0.489        |
| 0002165 | larval or pupal development (sensu Insecta)                    | 25                    | 400        | 100           | 2497        | 0.069        | 16               | 199        | 9         | 201        | 0.239        |
| 0007552 | metamorphosis                                                  | <b>25</b>             | <b>400</b> | <b>92</b>     | <b>2505</b> | <b>0.029</b> | 16               | 199        | 9         | 201        | 0.239        |
| 0009653 | morphogenesis                                                  | <b>62</b>             | <b>363</b> | <b>254</b>    | <b>2343</b> | <b>0.004</b> | 37               | 178        | 25        | 185        | 0.158        |
| 0002009 | morphogenesis of an epithelium                                 | 8                     | 417        | 32            | 2565        | 0.391        | 3                | 212        | 5         | 205        | 0.696        |
| 0009887 | organogenesis                                                  | <b>55</b>             | <b>370</b> | <b>227</b>    | <b>2370</b> | <b>0.008</b> | 32               | 183        | 23        | 187        | 0.288        |
| 0001654 | eye morphogenesis                                              | 5                     | 420        | 50            | 2547        | 0.382        | 3                | 212        | 2         | 208        | 0.979        |
| 0008406 | gonad development                                              | 2                     | 423        | 8             | 2589        | 0.932        | 1                | 214        | 1         | 209        | 0.489        |
| 0007444 | imaginal disc development                                      | 15                    | 410        | 76            | 2521        | 0.602        | 9                | 206        | 6         | 204        | 0.632        |
| 0007494 | midgut development                                             | 2                     | 423        | 2             | 2595        | 0.177        | 2                | 213        | 0         | 210        | 0.489        |
| 0007517 | muscle development                                             | 4                     | 421        | 29            | 2568        | 0.943        | 3                | 212        | 1         | 209        | 0.632        |
| 0007399 | neurogenesis                                                   | 28                    | 397        | 137           | 2460        | 0.323        | 16               | 199        | 12        | 198        | 0.602        |
| 0007409 | axonogenesis                                                   | 5                     | 420        | 42            | 2555        | 0.639        | 5                | 210        | 0         | 210        | 0.076        |
| 0007411 | axon guidance                                                  | 5                     | 420        | 30            | 2567        | 0.836        | 5                | 210        | 0         | 210        | 0.076        |
| 0007417 | central nervous system development                             | 5                     | 420        | 34            | 2563        | 0.994        | 2                | 213        | 3         | 207        | 0.979        |
| 0016358 | dendrite morphogenesis                                         | 1                     | 424        | 13            | 2584        | 0.718        | 0                | 215        | 1         | 209        | 0.991        |
| 0042063 | gliogenesis                                                    | 3                     | 422        | 8             | 2589        | 0.408        | 2                | 213        | 1         | 209        | 0.984        |
| 0007422 | peripheral nervous system development                          | 8                     | 417        | 32            | 2565        | 0.391        | 3                | 212        | 5         | 205        | 0.696        |
| 0050767 | regulation of neurogenesis                                     | 1                     | 424        | 5             | 2592        | 0.686        | 0                | 215        | 1         | 209        | 0.991        |
| 0007424 | tracheal system development (sensu Insecta)                    | 9                     | 416        | 26            | 2571        | 0.08         | 6                | 209        | 3         | 207        | 0.523        |
| 0048513 | organ development                                              | <b>56</b>             | <b>369</b> | <b>230</b>    | <b>2367</b> | <b>0.006</b> | 33               | 182        | 23        | 187        | 0.232        |
| 0007389 | pattern specification                                          | 10                    | 415        | 62            | 2535        | 0.898        | 6                | 209        | 4         | 206        | 0.778        |
| 0048066 | pigmentation                                                   | 2                     | 423        | 8             | 2589        | 0.932        | 1                | 214        | 1         | 209        | 0.489        |
| 0009791 | post-embryonic development                                     | 2                     | 423        | 15            | 2582        | 0.939        | 1                | 214        | 1         | 209        | 0.489        |
| 0009790 | embryonic development                                          | <b>22</b>             | <b>403</b> | <b>77</b>     | <b>2520</b> | <b>0.026</b> | 13               | 202        | 9         | 201        | 0.548        |
| 0007530 | sex determination                                              | 1                     | 424        | 9             | 2588        | 0.932        | 1                | 214        | 0         | 210        | 0.991        |
| 0007548 | sex differentiation                                            | 2                     | 423        | 16            | 2581        | 0.983        | 1                | 214        | 1         | 209        | 0.489        |
| 0019827 | stem cell maintenance                                          | 1                     | 424        | 7             | 2590        | 0.703        | 1                | 214        | 0         | 210        | 0.991        |
| 0000003 | reproduction                                                   | 17                    | 408        | 117           | 2480        | 0.732        | 8                | 207        | 9         | 201        | 0.961        |
| 0050793 | regulation of development                                      | 4                     | 421        | 39            | 2558        | 0.494        | 1                | 214        | 3         | 207        | 0.599        |
| 0007582 | physiological process                                          | 228                   | 197        | 1411          | 1186        | 0.834        | 107              | 108        | 121       | 89         | 0.127        |
| 0008152 | metabolism                                                     | 166                   | 259        | 1036          | 1561        | 0.786        | 75               | 140        | 91        | 119        | 0.092        |
| 0009056 | catabolism                                                     | 22                    | 403        | 181           | 2416        | 0.206        | 13               | 202        | 9         | 201        | 0.548        |
| 0006091 | energy pathways                                                | 17                    | 408        | 91            | 2506        | 0.712        | 7                | 208        | 10        | 200        | 0.586        |
| 0006118 | electron transport                                             | 6                     | 419        | 50            | 2547        | 0.594        | <b>0</b>         | <b>215</b> | <b>6</b>  | <b>204</b> | <b>0.037</b> |
| 0006139 | nucleobase, nucleoside, nucleotide and nucleic acid metabolism | 64                    | 361        | 370           | 2227        | 0.713        | 36               | 179        | 28        | 182        | 0.397        |
| 0006259 | DNA metabolism                                                 | 13                    | 412        | 67            | 2530        | 0.684        | 9                | 206        | 4         | 206        | 0.278        |
| 0006350 | transcription                                                  | 33                    | 392        | 192           | 2405        | 0.864        | <b>26</b>        | <b>189</b> | <b>7</b>  | <b>203</b> | <b>0.001</b> |
| 0043170 | macromolecule metabolism                                       | 90                    | 335        | 571           | 2026        | 0.756        | 37               | 178        | 53        | 157        | 0.057        |
| 0019538 | protein metabolism                                             | 66                    | 359        | 492           | 2105        | 0.106        | 28               | 187        | 38        | 172        | 0.19         |
| 0006412 | protein biosynthesis                                           | 14                    | 411        | 129           | 2468        | 0.167        | 5                | 210        | 9         | 201        | 0.39         |
| 0006464 | protein modification                                           | 31                    | 394        | 226           | 2371        | 0.384        | 15               | 200        | 16        | 194        | 0.946        |
| 0006457 | protein folding                                                | 8                     | 417        | 36            | 2561        | 0.567        | 1                | 214        | 7         | 203        | 0.069        |
| 0005975 | carbohydrate metabolism                                        | <b>27</b>             | <b>398</b> | <b>81</b>     | <b>2516</b> | <b>0.001</b> | 11               | 204        | 16        | 194        | 0.39         |
| 0006519 | amino acid and derivative metabolism                           | 12                    | 413        | 59            | 2538        | 0.601        | 4                | 211        | 8         | 202        | 0.358        |
| 0006629 | lipid metabolism                                               | 18                    | 407        | 75            | 2522        | 0.18         | <b>3</b>         | <b>212</b> | <b>15</b> | <b>195</b> | <b>0.007</b> |
| 0009308 | amine metabolism                                               | 14                    | 411        | 67            | 2530        | 0.495        | 5                | 210        | 9         | 201        | 0.39         |
| 0042440 | pigment metabolism                                             | 3                     | 422        | 9             | 2588        | 0.499        | 2                | 213        | 1         | 209        | 0.984        |
| 0042445 | hormone metabolism                                             | 2                     | 423        | 5             | 2592        | 0.575        | 1                | 214        | 1         | 209        | 0.489        |
| 0009058 | biosynthesis                                                   | 30                    | 395        | 212           | 2385        | 0.496        | 11               | 204        | 19        | 191        | 0.164        |
| 0019748 | secondary metabolism                                           | 3                     | 422        | 11            | 2586        | 0.682        | 2                | 213        | 1         | 209        | 0.984        |
| 0019222 | regulation of metabolism                                       | 33                    | 392        | 201           | 2396        | 0.936        | <b>27</b>        | <b>188</b> | <b>6</b>  | <b>204</b> | <b>4E-04</b> |
| 0016265 | death                                                          | 14                    | 411        | 74            | 2523        | 0.726        | 8                | 207        | 6         | 204        | 0.82         |
| 0008219 | cell death                                                     | 12                    | 413        | 64            | 2533        | 0.786        | 7                | 208        | 5         | 205        | 0.801        |
| 0016271 | tissue death                                                   | 6                     | 419        | 21            | 2576        | 0.344        | 4                | 211        | 2         | 208        | 0.702        |
| 0042592 | homeostasis                                                    | 7                     | 418        | 22            | 2575        | 0.194        | 4                | 211        | 3         | 207        | 0.975        |
| 0019725 | cell homeostasis                                               | 6                     | 419        | 20            | 2577        | 0.296        | 3                | 212        | 3         | 207        | 0.702        |
| 0050801 | ion homeostasis                                                | 3                     | 422        | 10            | 2587        | 0.591        | 2                | 213        | 1         | 209        | 0.984        |
| 0043062 | extracellular structure organization and biogenesis            | 2                     | 423        | 17            | 2580        | 0.909        | 1                | 214        | 1         | 209        | 0.489        |
| 0046903 | secretion                                                      | 13                    | 412        | 89            | 2508        | 0.807        | 8                | 207        | 5         | 205        | 0.603        |
| 0048511 | rhythmic process                                               | 5                     | 420        | 11            | 2586        | 0.105        | 3                | 212        | 2         | 208        | 0.979        |

## cGMP vs. cAMP (p &lt; 0.01; "up" means higher in cGMP)

| GO#     | GO term                                                       | Representational bias |            |               |             |             | Directional bias |            |           |            |              |
|---------|---------------------------------------------------------------|-----------------------|------------|---------------|-------------|-------------|------------------|------------|-----------|------------|--------------|
|         |                                                               | regulated             |            | not regulated |             | $\rho$      | up-reg.          |            | down-reg. |            | $\rho$       |
|         |                                                               | term                  | n.term     | term          | n.term      |             | term             | n.term     | term      | n.term     |              |
| 0050791 | regulation of physiological process                           | 47                    | 378        | 300           | 2297        | 0.831       | <b>32</b>        | <b>183</b> | <b>15</b> | <b>195</b> | <b>0.017</b> |
| 0050874 | organismal physiological process                              | 38                    | 387        | 190           | 2407        | 0.282       | 24               | 191        | 14        | 196        | 0.146        |
| 0050875 | cellular physiological process                                | 210                   | 215        | 1343          | 1254        | 0.408       | 100              | 115        | 110       | 100        | 0.266        |
| 0006810 | transport                                                     | 53                    | 372        | 348           | 2249        | 0.655       | 25               | 190        | 28        | 182        | 0.7          |
| 0006811 | ion transport                                                 | 16                    | 409        | 104           | 2493        | 0.92        | 7                | 208        | 9         | 201        | 0.762        |
| 0006818 | hydrogen transport                                            | 1                     | 424        | 18            | 2579        | 0.438       | 1                | 214        | 0         | 210        | 0.991        |
| 0006836 | neurotransmitter transport                                    | 1                     | 424        | 5             | 2592        | 0.686       | 1                | 214        | 0         | 210        | 0.991        |
| 0006858 | extracellular transport                                       | 3                     | 422        | 12            | 2585        | 0.771       | 0                | 215        | 3         | 207        | 0.238        |
| 0006869 | lipid transport                                               | 3                     | 422        | 14            | 2583        | 0.939       | 0                | 215        | 3         | 207        | 0.238        |
| 0008643 | carbohydrate transport                                        | 4                     | 421        | 11            | 2586        | 0.301       | 1                | 214        | 3         | 207        | 0.599        |
| 0015031 | protein transport                                             | 21                    | 404        | 158           | 2439        | 0.415       | 11               | 204        | 10        | 200        | 0.956        |
| 0015837 | amine transport                                               | 3                     | 422        | 10            | 2587        | 0.591       | 1                | 214        | 2         | 208        | 0.984        |
| 0015931 | nucleobase, nucleoside, nucleotide and nucleic acid transport | 0                     | 425        | 14            | 2583        | 0.258       | 0                | 215        | 0         | 210        | -            |
| 0016192 | vesicle-mediated transport                                    | 12                    | 413        | 108           | 2489        | 0.241       | 8                | 207        | 4         | 206        | 0.402        |
| 0045045 | secretory pathway                                             | 12                    | 413        | 84            | 2513        | 0.765       | 8                | 207        | 4         | 206        | 0.402        |
| 0046907 | intracellular transport                                       | 23                    | 402        | 176           | 2421        | 0.344       | 12               | 203        | 11        | 199        | 0.954        |
| 0051049 | regulation of transport                                       | 2                     | 423        | 16            | 2581        | 0.983       | 0                | 215        | 2         | 208        | 0.468        |
| 0008283 | cell proliferation                                            | 16                    | 409        | 56            | 2541        | 0.065       | 10               | 205        | 6         | 204        | 0.474        |
| 0007049 | cell cycle                                                    | 20                    | 405        | 111           | 2486        | 0.782       | 9                | 206        | 11        | 199        | 0.777        |
| 0017145 | stem cell division                                            | 2                     | 423        | 10            | 2587        | 0.876       | 2                | 213        | 0         | 210        | 0.489        |
| 0016043 | cell organization and biogenesis                              | 42                    | 383        | 232           | 2365        | 0.589       | 25               | 190        | 17        | 193        | 0.29         |
| 0000902 | cellular morphogenesis                                        | 7                     | 418        | 67            | 2530        | 0.325       | 5                | 210        | 2         | 208        | 0.465        |
| 0006996 | organelle organization and biogenesis                         | 36                    | 389        | 202           | 2395        | 0.693       | 20               | 195        | 16        | 194        | 0.654        |
| 0007010 | cytoskeleton organization and biogenesis                      | 24                    | 401        | 142           | 2455        | 0.972       | 14               | 201        | 10        | 200        | 0.568        |
| 0006997 | nuclear organization and biogenesis                           | 0                     | 425        | 9             | 2588        | 0.462       | 0                | 215        | 0         | 210        | -            |
| 0007028 | cytoplasm organization and biogenesis                         | 3                     | 422        | 14            | 2583        | 0.939       | 1                | 214        | 2         | 208        | 0.984        |
| 0016044 | membrane organization and biogenesis                          | 0                     | 425        | 8             | 2589        | 0.524       | 0                | 215        | 0         | 210        | -            |
| 0051128 | regulation of cell organization and biogenesis                | 1                     | 424        | 11            | 2586        | 0.876       | 0                | 215        | 1         | 209        | 0.991        |
| 0016049 | cell growth                                                   | 0                     | 425        | 9             | 2588        | 0.462       | 0                | 215        | 0         | 210        | -            |
| 0050896 | response to stimulus                                          | 29                    | 396        | 147           | 2450        | 0.402       | 15               | 200        | 14        | 196        | 0.948        |
| 0006950 | response to stress                                            | 9                     | 416        | 49            | 2548        | 0.896       | 3                | 212        | 6         | 204        | 0.478        |
| 0009408 | response to heat                                              | 2                     | 423        | 9             | 2588        | 0.967       | 0                | 215        | 2         | 208        | 0.468        |
| 0006979 | response to oxidative stress                                  | 0                     | 425        | 2             | 2595        | 0.656       | 0                | 215        | 0         | 210        | -            |
| 0051179 | localization                                                  | 54                    | 371        | 375           | 2222        | 0.382       | 25               | 190        | 29        | 181        | 0.596        |
| 0006403 | RNA localization                                              | 1                     | 424        | 28            | 2569        | 0.166       | 0                | 215        | 1         | 209        | 0.991        |
| 0008104 | protein localization                                          | 21                    | 404        | 171           | 2426        | 0.238       | 11               | 204        | 10        | 200        | 0.956        |
| 0051234 | establishment of localization                                 | 53                    | 372        | 353           | 2244        | 0.581       | 25               | 190        | 28        | 182        | 0.7          |
| 0051235 | maintenance of localization                                   | 0                     | 425        | 3             | 2594        | 0.897       | 0                | 215        | 0         | 210        | -            |
| 0050789 | regulation of biological process                              | 58                    | 367        | 344           | 2253        | 0.882       | <b>38</b>        | <b>177</b> | <b>20</b> | <b>190</b> | <b>0.021</b> |
| 0050790 | regulation of enzyme activity                                 | 2                     | 423        | 13            | 2584        | 0.771       | 1                | 214        | 1         | 209        | 0.489        |
| 0040029 | regulation of gene expression, epigenetic                     | 4                     | 421        | 16            | 2581        | 0.657       | 2                | 213        | 2         | 208        | 0.632        |
| 0006306 | DNA methylation                                               | 1                     | 424        | 6             | 2591        | 0.598       | 1                | 214        | 0         | 210        | 0.991        |
| 0045814 | negative regulation of gene expression, epigenetic            | 1                     | 424        | 6             | 2591        | 0.598       | 0                | 215        | 1         | 209        | 0.991        |
| 0006342 | chromatin silencing                                           | 1                     | 424        | 6             | 2591        | 0.598       | 0                | 215        | 1         | 209        | 0.991        |
| 0003674 | molecular_function                                            | 246                   | 179        | 1518          | 1079        | 0.867       | 121              | 94         | 125       | 85         | 0.563        |
| 0016209 | antioxidant activity                                          | 0                     | 425        | 8             | 2589        | 0.524       | 0                | 215        | 0         | 210        | -            |
| 0005488 | binding                                                       | 162                   | 263        | 880           | 1717        | 0.1         | 88               | 127        | 74        | 136        | 0.268        |
| 0005509 | calcium ion binding                                           | 11                    | 414        | 47            | 2550        | 0.372       | 4                | 211        | 7         | 203        | 0.515        |
| 0030246 | carbohydrate binding                                          | 2                     | 423        | 12            | 2585        | 0.718       | 1                | 214        | 1         | 209        | 0.489        |
| 0008289 | lipid binding                                                 | 6                     | 419        | 20            | 2577        | 0.296       | 3                | 212        | 3         | 207        | 0.702        |
| 0003676 | nucleic acid binding                                          | 52                    | 373        | 372           | 2225        | 0.283       | 31               | 184        | 21        | 189        | 0.214        |
| 0003677 | DNA binding                                                   | 29                    | 396        | 166           | 2431        | 0.819       | <b>21</b>        | <b>194</b> | <b>8</b>  | <b>202</b> | <b>0.025</b> |
| 0003682 | chromatin binding                                             | 6                     | 419        | 18            | 2579        | 0.21        | 3                | 212        | 3         | 207        | 0.702        |
| 0003700 | transcription factor activity                                 | 14                    | 411        | 73            | 2524        | 0.692       | 9                | 206        | 5         | 205        | 0.441        |
| 0003723 | RNA binding                                                   | 13                    | 412        | 110           | 2487        | 0.315       | 3                | 212        | 10        | 200        | 0.083        |
| 0008135 | translation factor activity, nucleic acid binding             | 4                     | 421        | 30            | 2567        | 0.889       | 2                | 213        | 2         | 208        | 0.632        |
| 0000166 | nucleotide binding                                            | 41                    | 384        | 215           | 2382        | 0.398       | 17               | 198        | 24        | 186        | 0.287        |
| 0005515 | protein binding                                               | <b>69</b>             | <b>356</b> | <b>313</b>    | <b>2284</b> | <b>0.02</b> | 39               | 176        | 30        | 180        | 0.344        |
| 0008134 | transcription factor binding                                  | 6                     | 419        | 23            | 2574        | 0.445       | 5                | 210        | 1         | 209        | 0.228        |
| 0008092 | cytoskeletal protein binding                                  | 16                    | 409        | 73            | 2524        | 0.356       | 10               | 205        | 6         | 204        | 0.474        |
| 0003779 | actin binding                                                 | 6                     | 419        | 48            | 2549        | 0.666       | 3                | 212        | 3         | 207        | 0.702        |
| 0003824 | catalytic activity                                            | 122                   | 303        | 718           | 1879        | 0.694       | <b>50</b>        | <b>165</b> | <b>72</b> | <b>138</b> | <b>0.016</b> |
| 0016787 | hydrolase activity                                            | 47                    | 378        | 313           | 2284        | 0.613       | 23               | 192        | 24        | 186        | 0.932        |
| 0003924 | GTPase activity                                               | 4                     | 421        | 32            | 2565        | 0.786       | 3                | 212        | 1         | 209        | 0.632        |
| 0004518 | nuclease activity                                             | 2                     | 423        | 12            | 2585        | 0.718       | 2                | 213        | 0         | 210        | 0.489        |

## cGMP vs. cAMP (p &lt; 0.01; "up" means higher in cGMP)

| GO#     | GO term                                    | Representational bias |            |               |             |              | Directional bias |        |           |        |        |
|---------|--------------------------------------------|-----------------------|------------|---------------|-------------|--------------|------------------|--------|-----------|--------|--------|
|         |                                            | regulated             |            | not regulated |             | $\rho$       | up-reg.          |        | down-reg. |        | $\rho$ |
|         |                                            | term                  | n.term     | term          | n.term      |              | term             | n.term | term      | n.term |        |
| 0008233 | peptidase activity                         | 11                    | 414        | 102           | 2495        | 0.226        | 6                | 209    | 5         | 205    | 0.968  |
| 0004721 | phosphoprotein phosphatase activity        | 4                     | 421        | 25            | 2572        | 0.821        | 3                | 212    | 1         | 209    | 0.632  |
| 0016740 | transferase activity                       | 40                    | 385        | 207           | 2390        | 0.363        | 18               | 197    | 22        | 188    | 0.564  |
| 0016301 | kinase activity                            | 20                    | 405        | 120           | 2477        | 0.962        | 11               | 204    | 9         | 201    | 0.861  |
| 0004672 | protein kinase activity                    | 16                    | 409        | 80            | 2517        | 0.551        | 9                | 206    | 7         | 203    | 0.836  |
| 0030234 | enzyme regulator activity                  | 18                    | 407        | 93            | 2504        | 0.599        | 12               | 203    | 6         | 204    | 0.249  |
| 0003774 | motor activity                             | 5                     | 420        | 22            | 2575        | 0.696        | 0                | 215    | 5         | 205    | 0.068  |
| 0004871 | signal transducer activity                 | 34                    | 391        | 217           | 2380        | 0.88         | 23               | 192    | 11        | 199    | 0.058  |
| 0004872 | receptor activity                          | 10                    | 415        | 94            | 2503        | 0.236        | 7                | 208    | 3         | 207    | 0.356  |
| 0004879 | ligand-dependent nuclear receptor activity | 1                     | 424        | 8             | 2589        | 0.822        | 0                | 215    | 1         | 209    | 0.991  |
| 0004888 | transmembrane receptor activity            | 7                     | 418        | 64            | 2533        | 0.391        | 6                | 209    | 1         | 209    | 0.135  |
| 0004930 | G-protein coupled receptor activity        | 2                     | 423        | 27            | 2570        | 0.397        | 2                | 213    | 0         | 210    | 0.489  |
| 0005057 | receptor signaling protein activity        | 13                    | 412        | 69            | 2528        | 0.755        | 8                | 207    | 5         | 205    | 0.603  |
| 0005102 | receptor binding                           | 11                    | 414        | 56            | 2541        | 0.702        | 8                | 207    | 3         | 207    | 0.237  |
| 0005198 | structural molecule activity               | 28                    | 397        | 166           | 2431        | 0.963        | 12               | 203    | 16        | 194    | 0.515  |
| 0030528 | transcription regulator activity           | 31                    | 394        | 167           | 2430        | 0.575        | 21               | 194    | 10        | 200    | 0.072  |
| 0045182 | translation regulator activity             | 4                     | 421        | 30            | 2567        | 0.889        | 2                | 213    | 2         | 208    | 0.632  |
| 0005215 | transporter activity                       | 33                    | 392        | 218           | 2379        | 0.733        | 14               | 201    | 19        | 191    | 0.426  |
| 0005489 | electron transporter activity              | 1                     | 424        | 28            | 2569        | 0.166        | 0                | 215    | 1         | 209    | 0.991  |
| 0005216 | ion channel activity                       | 5                     | 420        | 46            | 2551        | 0.497        | 3                | 212    | 2         | 208    | 0.979  |
| 0005244 | voltage-gated ion channel activity         | 3                     | 422        | 23            | 2574        | 0.929        | 2                | 213    | 1         | 209    | 0.984  |
| 0005575 | cellular_component                         | 162                   | 263        | 1087          | 1510        | 0.162        | 83               | 132    | 79        | 131    | 0.913  |
| 0005623 | cell                                       | 151                   | 274        | 992           | 1605        | 0.318        | 78               | 137    | 73        | 137    | 0.822  |
| 0005622 | intracellular                              | 111                   | 314        | 784           | 1813        | 0.1          | 53               | 162    | 58        | 152    | 0.558  |
| 0005737 | cytoplasm                                  | 59                    | 366        | 433           | 2164        | 0.17         | 26               | 189    | 33        | 177    | 0.348  |
| 0016023 | cytoplasmic vesicle                        | 8                     | 417        | 35            | 2562        | 0.521        | 5                | 210    | 3         | 207    | 0.746  |
| 0005829 | cytosol                                    | 9                     | 416        | 103           | 2494        | 0.083        | 2                | 213    | 7         | 203    | 0.167  |
| 0005783 | endoplasmic reticulum                      | 5                     | 420        | 52            | 2545        | 0.333        | 0                | 215    | 5         | 205    | 0.068  |
| 0005794 | Golgi apparatus                            | 1                     | 424        | 25            | 2572        | 0.222        | 1                | 214    | 0         | 210    | 0.991  |
| 0005815 | microtubule organizing center              | 1                     | 424        | 8             | 2589        | 0.822        | 1                | 214    | 0         | 210    | 0.991  |
| 0005739 | mitochondrion                              | 11                    | 414        | 98            | 2499        | 0.283        | 4                | 211    | 7         | 203    | 0.515  |
| 0005840 | ribosome                                   | 4                     | 421        | 53            | 2544        | 0.176        | 2                | 213    | 2         | 208    | 0.632  |
| 0005773 | vacuole                                    | 1                     | 424        | 15            | 2582        | 0.589        | 0                | 215    | 1         | 209    | 0.991  |
| 0005764 | lysosome                                   | 1                     | 424        | 5             | 2592        | 0.686        | 0                | 215    | 1         | 209    | 0.991  |
| 0005856 | cytoskeleton                               | 14                    | 411        | 70            | 2527        | 0.591        | 6                | 209    | 8         | 202    | 0.752  |
| 0005694 | chromosome                                 | 6                     | 419        | 32            | 2565        | 0.942        | 2                | 213    | 4         | 206    | 0.66   |
| 0000228 | nuclear chromosome                         | 0                     | 425        | 5             | 2592        | 0.794        | 0                | 215    | 0         | 210    | -      |
| 0005634 | nucleus                                    | 51                    | 374        | 325           | 2272        | 0.827        | 28               | 187    | 23        | 187    | 0.612  |
| 0005635 | nuclear membrane                           | 2                     | 423        | 16            | 2581        | 0.983        | 0                | 215    | 2         | 208    | 0.468  |
| 0005730 | nucleolus                                  | 0                     | 425        | 11            | 2586        | 0.363        | 0                | 215    | 0         | 210    | -      |
| 0005654 | nucleoplasm                                | 9                     | 416        | 65            | 2532        | 0.759        | 3                | 212    | 6         | 204    | 0.478  |
| 0005777 | peroxisome                                 | 1                     | 424        | 8             | 2589        | 0.822        | 0                | 215    | 1         | 209    | 0.991  |
| 0005886 | plasma membrane                            | 19                    | 406        | 128           | 2469        | 0.775        | 14               | 201    | 5         | 205    | 0.068  |
| 0005576 | extracellular region                       | <b>17</b>             | <b>408</b> | <b>53</b>     | <b>2544</b> | <b>0.021</b> | 9                | 206    | 8         | 202    | 0.961  |
| 0005578 | extracellular matrix (sensu Metazoa)       | <b>10</b>             | <b>415</b> | <b>25</b>     | <b>2572</b> | <b>0.025</b> | 5                | 210    | 5         | 205    | 0.778  |

## All Treatments vs. Control (p &lt; 0.01)

| GO#     | GO term                                                                           | Representational bias |        |               |        |        | Directional bias |        |           |        |        |
|---------|-----------------------------------------------------------------------------------|-----------------------|--------|---------------|--------|--------|------------------|--------|-----------|--------|--------|
|         |                                                                                   | regulated             |        | not regulated |        | $\rho$ | up-reg.          |        | down-reg. |        | $\rho$ |
|         |                                                                                   | term                  | n.term | term          | n.term |        | term             | n.term | term      | n.term |        |
| 0008150 | biological_process                                                                | 263                   | 176    | 1526          | 1057   | 0.784  | 133              | 106    | 130       | 70     | 0.058  |
| 0007610 | behavior                                                                          | 21                    | 418    | 137           | 2446   | 0.736  | 13               | 226    | 8         | 192    | 0.632  |
| 0030534 | adult behavior                                                                    | 2                     | 437    | 21            | 2562   | 0.617  | 1                | 238    | 1         | 199    | 0.558  |
| 0030537 | larval behavior                                                                   | 1                     | 438    | 8             | 2575   | 0.855  | 0                | 239    | 1         | 199    | 0.929  |
| 0007611 | learning and/or memory                                                            | 3                     | 436    | 21            | 2562   | 0.994  | 2                | 237    | 1         | 199    | 0.877  |
| 0007612 | learning                                                                          | 2                     | 437    | 13            | 2570   | 0.814  | 2                | 237    | 0         | 200    | 0.558  |
| 0007613 | memory                                                                            | 2                     | 437    | 9             | 2574   | 0.933  | 1                | 238    | 1         | 199    | 0.558  |
| 0007626 | locomotory behavior                                                               | 16                    | 423    | 104           | 2479   | 0.805  | 10               | 229    | 6         | 194    | 0.686  |
| 0007635 | chemosensory behavior                                                             | 2                     | 437    | 15            | 2568   | 0.983  | 2                | 237    | 0         | 200    | 0.558  |
| 0007622 | rhythmic behavior                                                                 | 5                     | 434    | 9             | 2574   | 0.061  | 2                | 237    | 3         | 197    | 0.841  |
| 0048512 | circadian behavior                                                                | 5                     | 434    | 8             | 2575   | 0.039  | 2                | 237    | 3         | 197    | 0.841  |
| 0009987 | cellular process                                                                  | 249                   | 190    | 1412          | 1171   | 0.454  | 126              | 113    | 123       | 77     | 0.08   |
| 0007154 | cell communication                                                                | 83                    | 356    | 404           | 2179   | 0.099  | 51               | 188    | 32        | 168    | 0.193  |
| 0007155 | cell adhesion                                                                     | 20                    | 419    | 65            | 2518   | 0.026  | 11               | 228    | 9         | 191    | 0.858  |
| 0008037 | cell recognition                                                                  | 1                     | 438    | 1             | 2582   | 0.674  | 1                | 238    | 0         | 200    | 0.929  |
| 0008038 | neuronal cell recognition                                                         | 1                     | 438    | 1             | 2582   | 0.674  | 1                | 238    | 0         | 200    | 0.929  |
| 0016337 | cell-cell adhesion                                                                | 10                    | 429    | 25            | 2558   | 0.033  | 5                | 234    | 5         | 195    | 0.971  |
| 0016339 | calcium-dependent cell-cell adhesion                                              | 2                     | 437    | 2             | 2581   | 0.192  | 1                | 238    | 1         | 199    | 0.558  |
| 0007156 | homophilic cell adhesion                                                          | 3                     | 436    | 3             | 2580   | 0.059  | 2                | 237    | 1         | 199    | 0.877  |
| 0007160 | cell-matrix adhesion                                                              | 2                     | 437    | 7             | 2576   | 0.855  | 1                | 238    | 1         | 199    | 0.558  |
| 0007267 | cell-cell signaling                                                               | 30                    | 409    | 124           | 2459   | 0.094  | 18               | 221    | 12        | 188    | 0.657  |
| 0019226 | transmission of nerve impulse                                                     | 28                    | 411    | 108           | 2475   | 0.054  | 17               | 222    | 11        | 189    | 0.622  |
| 0007268 | synaptic transmission                                                             | 22                    | 417    | 79            | 2504   | 0.05   | 14               | 225    | 8         | 192    | 0.504  |
| 0007270 | nerve-nerve synaptic transmission                                                 | 1                     | 438    | 15            | 2568   | 0.558  | 0                | 239    | 1         | 199    | 0.929  |
| 0001505 | regulation of neurotransmitter levels                                             | 15                    | 424    | 45            | 2538   | 0.032  | 11               | 228    | 4         | 196    | 0.218  |
| 0042133 | neurotransmitter metabolism                                                       | 3                     | 436    | 5             | 2578   | 0.179  | 2                | 237    | 1         | 199    | 0.877  |
| 0007269 | neurotransmitter secretion                                                        | 12                    | 427    | 41            | 2542   | 0.135  | 9                | 230    | 3         | 197    | 0.248  |
| 0007165 | signal transduction                                                               | 57                    | 382    | 320           | 2263   | 0.786  | 32               | 207    | 25        | 175    | 0.894  |
| 0007166 | cell surface receptor linked signal transduction                                  | 21                    | 418    | 135           | 2448   | 0.786  | 11               | 228    | 10        | 190    | 0.976  |
| 0007167 | enzyme linked receptor protein signaling pathway                                  | 7                     | 432    | 38            | 2545   | 0.987  | 3                | 236    | 4         | 196    | 0.812  |
| 0007178 | transmembrane receptor protein serine/threonine kinase signaling pathway          | 2                     | 437    | 13            | 2570   | 0.814  | 1                | 238    | 1         | 199    | 0.558  |
| 0007179 | transforming growth factor beta receptor signaling pathway                        | 2                     | 437    | 7             | 2576   | 0.855  | 1                | 238    | 1         | 199    | 0.558  |
| 0007169 | transmembrane receptor protein tyrosine kinase signaling pathway                  | 5                     | 434    | 26            | 2557   | 0.999  | 2                | 237    | 3         | 197    | 0.841  |
| 0007173 | epidermal growth factor receptor signaling pathway                                | 1                     | 438    | 6             | 2577   | 0.604  | 0                | 239    | 1         | 199    | 0.929  |
| 0008286 | insulin receptor signaling pathway                                                | 0                     | 439    | 4             | 2579   | 0.908  | 0                | 239    | 0         | 200    | -      |
| 0008293 | torso signaling pathway                                                           | 2                     | 437    | 5             | 2578   | 0.604  | 0                | 239    | 2         | 198    | 0.402  |
| 0007186 | G-protein coupled receptor protein signaling pathway                              | 8                     | 431    | 63            | 2520   | 0.536  | 6                | 233    | 2         | 198    | 0.412  |
| 0007200 | G-protein signaling, coupled to IP3 second messenger (phospholipase C activating) | 2                     | 437    | 3             | 2580   | 0.326  | 2                | 237    | 0         | 200    | 0.558  |
| 0007219 | Notch signaling pathway                                                           | 2                     | 437    | 11            | 2572   | 0.759  | 1                | 238    | 1         | 199    | 0.558  |
| 0007224 | smoothened signaling pathway                                                      | 0                     | 439    | 6             | 2577   | 0.666  | 0                | 239    | 0         | 200    | -      |
| 0008063 | Toll signaling pathway                                                            | 2                     | 437    | 2             | 2581   | 0.192  | 1                | 238    | 1         | 199    | 0.558  |
| 0016055 | Wnt receptor signaling pathway                                                    | 5                     | 434    | 9             | 2574   | 0.061  | 2                | 237    | 3         | 197    | 0.841  |
| 0007242 | intracellular signaling cascade                                                   | 28                    | 411    | 158           | 2425   | 0.918  | 17               | 222    | 11        | 189    | 0.622  |
| 0007263 | nitric oxide mediated signal transduction                                         | 0                     | 439    | 3             | 2580   | 0.916  | 0                | 239    | 0         | 200    | -      |
| 0007243 | protein kinase cascade                                                            | 6                     | 433    | 38            | 2545   | 0.963  | 4                | 235    | 2         | 198    | 0.847  |
| 0007259 | JAK-STAT cascade                                                                  | 0                     | 439    | 6             | 2577   | 0.666  | 0                | 239    | 0         | 200    | -      |
| 0000165 | MAPKKK cascade                                                                    | 6                     | 433    | 29            | 2554   | 0.841  | 4                | 235    | 2         | 198    | 0.847  |
| 0019932 | second-messenger-mediated signaling                                               | 4                     | 435    | 18            | 2565   | 0.853  | 4                | 235    | 0         | 200    | 0.182  |
| 0019722 | calcium-mediated signaling                                                        | 2                     | 437    | 13            | 2570   | 0.814  | 2                | 237    | 0         | 200    | 0.558  |
| 0048015 | phosphoinositide-mediated signaling                                               | 2                     | 437    | 3             | 2580   | 0.326  | 2                | 237    | 0         | 200    | 0.558  |
| 0007264 | small GTPase mediated signal transduction                                         | 7                     | 432    | 38            | 2545   | 0.987  | 3                | 236    | 4         | 196    | 0.812  |
| 0007265 | Ras protein signal transduction                                                   | 2                     | 437    | 9             | 2574   | 0.933  | 1                | 238    | 1         | 199    | 0.558  |
| 0009966 | regulation of signal transduction                                                 | 6                     | 433    | 26            | 2557   | 0.668  | 1                | 238    | 5         | 195    | 0.145  |
| 0007275 | development                                                                       | 82                    | 357    | 372           | 2211   | 0.025  | 44               | 195    | 38        | 162    | 0.972  |
| 0007568 | aging                                                                             | 2                     | 437    | 9             | 2574   | 0.933  | 1                | 238    | 1         | 199    | 0.558  |
| 0030154 | cell differentiation                                                              | 18                    | 421    | 95            | 2488   | 0.768  | 10               | 229    | 8         | 192    | 0.885  |
| 0048468 | cell development                                                                  | 9                     | 430    | 61            | 2522   | 0.818  | 7                | 232    | 2         | 198    | 0.279  |
| 0000904 | cellular morphogenesis during differentiation                                     | 0                     | 439    | 18            | 2565   | 0.156  | 0                | 239    | 0         | 200    | -      |
| 0042461 | photoreceptor cell development                                                    | 0                     | 439    | 18            | 2565   | 0.156  | 0                | 239    | 0         | 200    | -      |
| 0042051 | eye photoreceptor development (sensu Endopterygota)                               | 0                     | 439    | 17            | 2566   | 0.174  | 0                | 239    | 0         | 200    | -      |
| 0045165 | cell fate commitment                                                              | 10                    | 429    | 36            | 2547   | 0.235  | 3                | 236    | 7         | 193    | 0.212  |

## All Treatments vs. Control (p &lt; 0.01)

| GO#     | GO term                                                       | Representational bias |            |               |             |              | Directional bias |            |            |            |              |
|---------|---------------------------------------------------------------|-----------------------|------------|---------------|-------------|--------------|------------------|------------|------------|------------|--------------|
|         |                                                               | regulated             |            | not regulated |             | $\rho$       | up-reg.          |            | down-reg.  |            | $\rho$       |
|         |                                                               | term                  | n.term     | term          | n.term      |              | term             | n.term     | term       | n.term     |              |
| 0001709 | cell fate determination                                       | 5                     | 434        | 23            | 2560        | 0.816        | 2                | 237        | 3          | 197        | 0.841        |
| 0007400 | neuroblast cell fate determination                            | 3                     | 436        | 5             | 2578        | 0.179        | 1                | 238        | 2          | 198        | 0.877        |
| 0001708 | cell fate specification                                       | 0                     | 439        | 7             | 2576        | 0.579        | 0                | 239        | 0          | 200        | -            |
| 0007349 | cellularization                                               | 2                     | 437        | 8             | 2575        | 0.966        | 1                | 238        | 1          | 199        | 0.558        |
| 0040007 | growth                                                        | 5                     | 434        | 31            | 2552        | 0.898        | 2                | 237        | 3          | 197        | 0.841        |
| 0002164 | larval development                                            | 4                     | 435        | 13            | 2570        | 0.477        | 2                | 237        | 2          | 198        | 0.745        |
| 0002165 | larval or pupal development (sensu Insecta)                   | 21                    | 418        | 104           | 2479        | 0.544        | 11               | 228        | 10         | 190        | 0.976        |
| 0007552 | metamorphosis                                                 | 20                    | 419        | 97            | 2486        | 0.503        | 10               | 229        | 10         | 190        | 0.858        |
| 0009653 | morphogenesis                                                 | 55                    | 384        | 261           | 2322        | 0.147        | 31               | 208        | 24         | 176        | 0.872        |
| 0002009 | morphogenesis of an epithelium                                | 8                     | 431        | 32            | 2551        | 0.445        | 4                | 235        | 4          | 196        | 0.917        |
| 0009887 | organogenesis                                                 | 49                    | 390        | 233           | 2350        | 0.181        | 25               | 214        | 24         | 176        | 0.72         |
| 0001654 | eye morphogenesis                                             | 7                     | 432        | 48            | 2535        | 0.85         | 2                | 237        | 5          | 195        | 0.316        |
| 0008406 | gonad development                                             | 3                     | 436        | 7             | 2576        | 0.346        | 2                | 237        | 1          | 199        | 0.877        |
| 0007444 | imaginal disc development                                     | 14                    | 425        | 77            | 2506        | 0.932        | 5                | 234        | 9          | 191        | 0.247        |
| 0007494 | midgut development                                            | 1                     | 438        | 3             | 2580        | 0.908        | 1                | 238        | 0          | 200        | 0.929        |
| 0007517 | muscle development                                            | 4                     | 435        | 29            | 2554        | 0.884        | 4                | 235        | 0          | 200        | 0.182        |
| 0007399 | neurogenesis                                                  | 29                    | 410        | 136           | 2447        | 0.303        | 15               | 224        | 14         | 186        | 0.911        |
| 0007409 | axonogenesis                                                  | 5                     | 434        | 42            | 2541        | 0.58         | 2                | 237        | 3          | 197        | 0.841        |
| 0007411 | axon guidance                                                 | 3                     | 436        | 32            | 2551        | 0.445        | 2                | 237        | 1          | 199        | 0.877        |
| 0007417 | central nervous system development                            | 6                     | 433        | 33            | 2550        | 0.94         | 3                | 236        | 3          | 197        | 0.847        |
| 0016358 | dendrite morphogenesis                                        | 2                     | 437        | 12            | 2571        | 0.723        | 1                | 238        | 1          | 199        | 0.558        |
| 0042063 | gliogenesis                                                   | 2                     | 437        | 9             | 2574        | 0.933        | 2                | 237        | 0          | 200        | 0.558        |
| 0007422 | peripheral nervous system development                         | 7                     | 432        | 33            | 2550        | 0.756        | 2                | 237        | 5          | 195        | 0.316        |
| 0050767 | regulation of neurogenesis                                    | 1                     | 438        | 5             | 2578        | 0.666        | 0                | 239        | 1          | 199        | 0.929        |
| 0007424 | tracheal system development (sensu Insecta)                   | 9                     | 430        | 26            | 2557        | 0.099        | 6                | 233        | 3          | 197        | 0.685        |
| 0048513 | organ development                                             | 50                    | 389        | 236           | 2347        | 0.161        | 26               | 213        | 24         | 176        | 0.828        |
| 0007389 | pattern specification                                         | <b>17</b>             | <b>422</b> | <b>55</b>     | <b>2528</b> | <b>0.041</b> | 12               | 227        | 5          | 195        | 0.265        |
| 0048066 | pigmentation                                                  | 3                     | 436        | 7             | 2576        | 0.346        | 2                | 237        | 1          | 199        | 0.877        |
| 0009791 | post-embryonic development                                    | 4                     | 435        | 13            | 2570        | 0.477        | 2                | 237        | 2          | 198        | 0.745        |
| 0009790 | embryonic development                                         | <b>27</b>             | <b>412</b> | <b>72</b>     | <b>2511</b> | <b>4E-04</b> | 16               | 223        | 11         | 189        | 0.749        |
| 0007530 | sex determination                                             | 1                     | 438        | 9             | 2574        | 0.966        | 1                | 238        | 0          | 200        | 0.929        |
| 0007548 | sex differentiation                                           | 3                     | 436        | 15            | 2568        | 0.939        | 2                | 237        | 1          | 199        | 0.877        |
| 0019827 | stem cell maintenance                                         | 2                     | 437        | 6             | 2577        | 0.734        | 1                | 238        | 1          | 199        | 0.558        |
| 0000003 | reproduction                                                  | 21                    | 418        | 113           | 2470        | 0.795        | 12               | 227        | 9          | 191        | 0.976        |
| 0050793 | regulation of development                                     | 4                     | 435        | 39            | 2544        | 0.446        | 2                | 237        | 2          | 198        | 0.745        |
| 0007582 | physiological process                                         | 239                   | 200        | 1400          | 1183        | 0.966        | <b>118</b>       | <b>121</b> | <b>121</b> | <b>79</b>  | <b>0.025</b> |
| 0008152 | metabolism                                                    | 176                   | 263        | 1026          | 1557        | 0.925        | <b>81</b>        | <b>158</b> | <b>95</b>  | <b>105</b> | <b>0.005</b> |
| 0009056 | catabolism                                                    | 26                    | 413        | 177           | 2406        | 0.538        | 17               | 222        | 9          | 191        | 0.341        |
| 0006091 | energy pathways                                               | 13                    | 426        | 95            | 2488        | 0.543        | 8                | 231        | 5          | 195        | 0.811        |
| 0006118 | electron transport                                            | 6                     | 433        | 50            | 2533        | 0.531        | 3                | 236        | 3          | 197        | 0.847        |
| 0006139 | nucleobase, nucleoside, nucleotide and nucleic acid metabolis | 61                    | 378        | 373           | 2210        | 0.82         | 35               | 204        | 26         | 174        | 0.721        |
| 0006259 | DNA metabolism                                                | 13                    | 426        | 67            | 2516        | 0.778        | 6                | 233        | 7          | 193        | 0.744        |
| 0006350 | transcription                                                 | 29                    | 410        | 196           | 2387        | 0.531        | 21               | 218        | 8          | 192        | 0.069        |
| 0043170 | macromolecule metabolism                                      | 90                    | 349        | 571           | 2012        | 0.49         | <b>33</b>        | <b>206</b> | <b>57</b>  | <b>143</b> | <b>2E-04</b> |
| 0019538 | protein metabolism                                            | 73                    | 366        | 485           | 2098        | 0.315        | <b>27</b>        | <b>212</b> | <b>46</b>  | <b>154</b> | <b>0.002</b> |
| 0006412 | protein biosynthesis                                          | 14                    | 425        | 129           | 2454        | 0.127        | 4                | 235        | 10         | 190        | 0.089        |
| 0006464 | protein modification                                          | 30                    | 409        | 227           | 2356        | 0.206        | 11               | 228        | 19         | 181        | 0.066        |
| 0006457 | protein folding                                               | <b>12</b>             | <b>427</b> | <b>32</b>     | <b>2551</b> | <b>0.028</b> | <b>0</b>         | <b>239</b> | <b>12</b>  | <b>188</b> | <b>4E-04</b> |
| 0005975 | carbohydrate metabolism                                       | 21                    | 418        | 87            | 2496        | 0.181        | 8                | 231        | 13         | 187        | 0.188        |
| 0006519 | amino acid and derivative metabolism                          | 14                    | 425        | 57            | 2526        | 0.278        | 4                | 235        | 10         | 190        | 0.089        |
| 0006629 | lipid metabolism                                              | 16                    | 423        | 77            | 2506        | 0.552        | 7                | 232        | 9          | 191        | 0.536        |
| 0009308 | amine metabolism                                              | 16                    | 423        | 65            | 2518        | 0.233        | 5                | 234        | 11         | 189        | 0.101        |
| 0042440 | pigment metabolism                                            | 1                     | 438        | 11            | 2572        | 0.842        | 1                | 238        | 0          | 200        | 0.929        |
| 0042445 | hormone metabolism                                            | 3                     | 436        | 4             | 2579        | 0.111        | 2                | 237        | 1          | 199        | 0.877        |
| 0009058 | biosynthesis                                                  | 27                    | 412        | 215           | 2368        | 0.145        | 11               | 228        | 16         | 184        | 0.202        |
| 0019748 | secondary metabolism                                          | 1                     | 438        | 13            | 2570        | 0.685        | 1                | 238        | 0          | 200        | 0.929        |
| 0019222 | regulation of metabolism                                      | 31                    | 408        | 203           | 2380        | 0.63         | 21               | 218        | 10         | 190        | 0.175        |
| 0016265 | death                                                         | 13                    | 426        | 75            | 2508        | 0.931        | 5                | 234        | 8          | 192        | 0.373        |
| 0008219 | cell death                                                    | 11                    | 428        | 65            | 2518        | 0.88         | 4                | 235        | 7          | 193        | 0.361        |
| 0016271 | tissue death                                                  | 5                     | 434        | 22            | 2561        | 0.751        | 2                | 237        | 3          | 197        | 0.841        |
| 0042592 | homeostasis                                                   | 6                     | 433        | 23            | 2560        | 0.495        | 3                | 236        | 3          | 197        | 0.847        |
| 0019725 | cell homeostasis                                              | 5                     | 434        | 21            | 2562        | 0.686        | 2                | 237        | 3          | 197        | 0.841        |
| 0050801 | ion homeostasis                                               | <b>5</b>              | <b>434</b> | <b>8</b>      | <b>2575</b> | <b>0.039</b> | 2                | 237        | 3          | 197        | 0.841        |
| 0043062 | extracellular structure organization and biogenesis           | 2                     | 437        | 17            | 2566        | 0.865        | 2                | 237        | 0          | 200        | 0.558        |
| 0046903 | secretion                                                     | 17                    | 422        | 85            | 2498        | 0.631        | 11               | 228        | 6          | 194        | 0.536        |
| 0048511 | rhythmic process                                              | 5                     | 434        | 11            | 2572        | 0.122        | 2                | 237        | 3          | 197        | 0.841        |

## All Treatments vs. Control (p &lt; 0.01)

| GO#     | GO term                                                       | Representational bias |            |               |             |              | Directional bias |            |            |            |              |
|---------|---------------------------------------------------------------|-----------------------|------------|---------------|-------------|--------------|------------------|------------|------------|------------|--------------|
|         |                                                               | regulated             |            | not regulated |             | $\rho$       | up-reg.          |            | down-reg.  |            | $\rho$       |
|         |                                                               | term                  | n.term     | term          | n.term      |              | term             | n.term     | term       | n.term     |              |
| 0050791 | regulation of physiological process                           | 50                    | 389        | 297           | 2286        | 0.988        | 28               | 211        | 22         | 178        | 0.933        |
| 0050874 | organismal physiological process                              | <b>46</b>             | <b>393</b> | <b>182</b>    | <b>2401</b> | <b>0.016</b> | 28               | 211        | 18         | 182        | 0.442        |
| 0050875 | cellular physiological process                                | 222                   | 217        | 1331          | 1252        | 0.749        | <b>110</b>       | <b>129</b> | <b>112</b> | <b>88</b>  | <b>0.047</b> |
| 0006810 | transport                                                     | 63                    | 376        | 338           | 2245        | 0.518        | 33               | 206        | 30         | 170        | 0.827        |
| 0006811 | ion transport                                                 | 24                    | 415        | 96            | 2487        | 0.109        | 14               | 225        | 10         | 190        | 0.855        |
| 0006818 | hydrogen transport                                            | 4                     | 435        | 15            | 2568        | 0.629        | 3                | 236        | 1          | 199        | 0.745        |
| 0006836 | neurotransmitter transport                                    | 0                     | 439        | 6             | 2577        | 0.666        | 0                | 239        | 0          | 200        | -            |
| 0006858 | extracellular transport                                       | 4                     | 435        | 11            | 2572        | 0.332        | 1                | 238        | 3          | 197        | 0.494        |
| 0006869 | lipid transport                                               | 3                     | 436        | 14            | 2569        | 0.983        | 0                | 239        | 3          | 197        | 0.187        |
| 0008643 | carbohydrate transport                                        | <b>6</b>              | <b>433</b> | <b>9</b>      | <b>2574</b> | <b>0.015</b> | 2                | 237        | 4          | 196        | 0.527        |
| 0015031 | protein transport                                             | 19                    | 420        | 160           | 2423        | 0.155        | 10               | 229        | 9          | 191        | 0.941        |
| 0015837 | amine transport                                               | 4                     | 435        | 9             | 2574        | 0.204        | 2                | 237        | 2          | 198        | 0.745        |
| 0015931 | nucleobase, nucleoside, nucleotide and nucleic acid transport | 3                     | 436        | 11            | 2572        | 0.723        | 2                | 237        | 1          | 199        | 0.877        |
| 0016192 | vesicle-mediated transport                                    | 17                    | 422        | 103           | 2480        | 0.986        | 11               | 228        | 6          | 194        | 0.536        |
| 0045045 | secretory pathway                                             | 16                    | 423        | 80            | 2503        | 0.647        | 10               | 229        | 6          | 194        | 0.686        |
| 0046907 | intracellular transport                                       | 24                    | 415        | 175           | 2408        | 0.359        | 13               | 226        | 11         | 189        | 0.855        |
| 0051049 | regulation of transport                                       | 4                     | 435        | 14            | 2569        | 0.553        | 1                | 238        | 3          | 197        | 0.494        |
| 0008283 | cell proliferation                                            | <b>17</b>             | <b>422</b> | <b>55</b>     | <b>2528</b> | <b>0.041</b> | 9                | 230        | 8          | 192        | 0.903        |
| 0007049 | cell cycle                                                    | 23                    | 416        | 108           | 2475        | 0.379        | 14               | 225        | 9          | 191        | 0.674        |
| 0017145 | stem cell division                                            | 4                     | 435        | 8             | 2575        | 0.149        | 2                | 237        | 2          | 198        | 0.745        |
| 0016043 | cell organization and biogenesis                              | 44                    | 395        | 230           | 2353        | 0.506        | 26               | 213        | 18         | 182        | 0.622        |
| 0000902 | cellular morphogenesis                                        | 8                     | 431        | 66            | 2517        | 0.452        | 4                | 235        | 4          | 196        | 0.917        |
| 0006996 | organelle organization and biogenesis                         | 38                    | 401        | 200           | 2383        | 0.575        | 20               | 219        | 18         | 182        | 0.949        |
| 0007010 | cytoskeleton organization and biogenesis                      | 28                    | 411        | 138           | 2445        | 0.443        | 16               | 223        | 12         | 188        | 0.92         |
| 0006997 | nuclear organization and biogenesis                           | 1                     | 438        | 8             | 2575        | 0.855        | 1                | 238        | 0          | 200        | 0.929        |
| 0007028 | cytoplasm organization and biogenesis                         | 5                     | 434        | 12            | 2571        | 0.161        | 3                | 236        | 2          | 198        | 0.841        |
| 0016044 | membrane organization and biogenesis                          | 2                     | 437        | 6             | 2577        | 0.734        | 2                | 237        | 0          | 200        | 0.558        |
| 0051128 | regulation of cell organization and biogenesis                | 1                     | 438        | 11            | 2572        | 0.842        | 0                | 239        | 1          | 199        | 0.929        |
| 0016049 | cell growth                                                   | 1                     | 438        | 8             | 2575        | 0.855        | 0                | 239        | 1          | 199        | 0.929        |
| 0050896 | response to stimulus                                          | <b>37</b>             | <b>402</b> | <b>139</b>    | <b>2444</b> | <b>0.016</b> | 18               | 221        | 19         | 181        | 0.571        |
| 0006950 | response to stress                                            | <b>15</b>             | <b>424</b> | <b>43</b>     | <b>2540</b> | <b>0.022</b> | <b>2</b>         | <b>237</b> | <b>13</b>  | <b>187</b> | <b>0.003</b> |
| 0009408 | response to heat                                              | <b>5</b>              | <b>434</b> | <b>6</b>      | <b>2577</b> | <b>0.013</b> | <b>0</b>         | <b>239</b> | <b>5</b>   | <b>195</b> | <b>0.045</b> |
| 0006979 | response to oxidative stress                                  | 0                     | 439        | 2             | 2581        | 0.674        | 0                | 239        | 0          | 200        | -            |
| 0051179 | localization                                                  | 69                    | 370        | 360           | 2223        | 0.361        | 35               | 204        | 34         | 166        | 0.587        |
| 0006403 | RNA localization                                              | 4                     | 435        | 25            | 2558        | 0.879        | 2                | 237        | 2          | 198        | 0.745        |
| 0008104 | protein localization                                          | 22                    | 417        | 170           | 2413        | 0.254        | 11               | 228        | 11         | 189        | 0.834        |
| 0051234 | establishment of localization                                 | 64                    | 375        | 342           | 2241        | 0.494        | 34               | 205        | 30         | 170        | 0.926        |
| 0051235 | maintenance of localization                                   | 1                     | 438        | 2             | 2581        | 0.916        | 1                | 238        | 0          | 200        | 0.929        |
| 0050789 | regulation of biological process                              | 59                    | 380        | 343           | 2240        | 0.988        | 31               | 208        | 28         | 172        | 0.862        |
| 0050790 | regulation of enzyme activity                                 | 1                     | 438        | 14            | 2569        | 0.618        | 1                | 238        | 0          | 200        | 0.929        |
| 0040029 | regulation of gene expression, epigenetic                     | 5                     | 434        | 15            | 2568        | 0.31         | 1                | 238        | 4          | 196        | 0.27         |
| 0006306 | DNA methylation                                               | 2                     | 437        | 5             | 2578        | 0.604        | 1                | 238        | 1          | 199        | 0.558        |
| 0045814 | negative regulation of gene expression, epigenetic            | 1                     | 438        | 6             | 2577        | 0.604        | 0                | 239        | 1          | 199        | 0.929        |
| 0006342 | chromatin silencing                                           | 1                     | 438        | 6             | 2577        | 0.604        | 0                | 239        | 1          | 199        | 0.929        |
| 0003674 | molecular_function                                            | 252                   | 187        | 1512          | 1071        | 0.694        | <b>125</b>       | <b>114</b> | <b>127</b> | <b>73</b>  | <b>0.023</b> |
| 0016209 | antioxidant activity                                          | 0                     | 439        | 8             | 2575        | 0.506        | 0                | 239        | 0          | 200        | -            |
| 0005488 | binding                                                       | 147                   | 292        | 895           | 1688        | 0.674        | 70               | 169        | 77         | 123        | 0.053        |
| 0005509 | calcium ion binding                                           | 10                    | 429        | 48            | 2535        | 0.686        | 6                | 233        | 4          | 196        | 0.971        |
| 0030246 | carbohydrate binding                                          | 2                     | 437        | 12            | 2571        | 0.723        | 1                | 238        | 1          | 199        | 0.558        |
| 0008289 | lipid binding                                                 | 4                     | 435        | 22            | 2561        | 0.877        | 1                | 238        | 3          | 197        | 0.494        |
| 0003676 | nucleic acid binding                                          | 54                    | 385        | 370           | 2213        | 0.292        | 26               | 213        | 28         | 172        | 0.398        |
| 0003677 | DNA binding                                                   | 30                    | 409        | 165           | 2418        | 0.805        | 19               | 220        | 11         | 189        | 0.41         |
| 0003682 | chromatin binding                                             | 4                     | 435        | 20            | 2563        | 0.994        | 1                | 238        | 3          | 197        | 0.494        |
| 0003700 | transcription factor activity                                 | 10                    | 429        | 77            | 2506        | 0.509        | 8                | 231        | 2          | 198        | 0.187        |
| 0003723 | RNA binding                                                   | 15                    | 424        | 108           | 2475        | 0.536        | 5                | 234        | 10         | 190        | 0.16         |
| 0008135 | translation factor activity, nucleic acid binding             | 4                     | 435        | 30            | 2553        | 0.83         | 0                | 239        | 4          | 196        | 0.091        |
| 0000166 | nucleotide binding                                            | 42                    | 397        | 214           | 2369        | 0.424        | <b>14</b>        | <b>225</b> | <b>28</b>  | <b>172</b> | <b>0.006</b> |
| 0005515 | protein binding                                               | 58                    | 381        | 324           | 2259        | 0.755        | 32               | 207        | 26         | 174        | 0.983        |
| 0008134 | transcription factor binding                                  | 3                     | 436        | 26            | 2557        | 0.706        | 1                | 238        | 2          | 198        | 0.877        |
| 0008092 | cytoskeletal protein binding                                  | 17                    | 422        | 72            | 2511        | 0.276        | 11               | 228        | 6          | 194        | 0.536        |
| 0003779 | actin binding                                                 | 10                    | 429        | 44            | 2539        | 0.519        | 7                | 232        | 3          | 197        | 0.498        |
| 0003824 | catalytic activity                                            | 126                   | 313        | 714           | 1869        | 0.689        | 61               | 178        | 65         | 135        | 0.133        |
| 0016787 | hydrolase activity                                            | 63                    | 376        | 297           | 2286        | 0.104        | 36               | 203        | 27         | 173        | 0.743        |
| 0003924 | GTPase activity                                               | 5                     | 434        | 31            | 2552        | 0.898        | 1                | 238        | 4          | 196        | 0.27         |
| 0004518 | nuclease activity                                             | 1                     | 438        | 13            | 2570        | 0.685        | 1                | 238        | 0          | 200        | 0.929        |



## All Treatments vs. Control (p &lt; 0.01)

| GO#     | GO term                                    | Representational bias |        |               |        |        | Directional bias |        |           |        |        |
|---------|--------------------------------------------|-----------------------|--------|---------------|--------|--------|------------------|--------|-----------|--------|--------|
|         |                                            | regulated             |        | not regulated |        | $\rho$ | up-reg.          |        | down-reg. |        | $\rho$ |
|         |                                            | term                  | n.term | term          | n.term |        | term             | n.term | term      | n.term |        |
| 0008233 | peptidase activity                         | 14                    | 425    | 99            | 2484   | 0.602  | 11               | 228    | 3         | 197    | 0.116  |
| 0004721 | phosphoprotein phosphatase activity        | 5                     | 434    | 24            | 2559   | 0.879  | 3                | 236    | 2         | 198    | 0.841  |
| 0016740 | transferase activity                       | 35                    | 404    | 212           | 2371   | 0.943  | 14               | 225    | 21        | 179    | 0.107  |
| 0016301 | kinase activity                            | 14                    | 425    | 126           | 2457   | 0.152  | 7                | 232    | 7         | 193    | 0.947  |
| 0004672 | protein kinase activity                    | 9                     | 430    | 87            | 2496   | 0.191  | 4                | 235    | 5         | 195    | 0.787  |
| 0030234 | enzyme regulator activity                  | 15                    | 424    | 96            | 2487   | 0.864  | 9                | 230    | 6         | 194    | 0.86   |
| 0003774 | motor activity                             | 3                     | 436    | 24            | 2559   | 0.817  | 2                | 237    | 1         | 199    | 0.877  |
| 0004871 | signal transducer activity                 | 29                    | 410    | 222           | 2361   | 0.193  | 15               | 224    | 14        | 186    | 0.911  |
| 0004872 | receptor activity                          | 11                    | 428    | 93            | 2490   | 0.307  | 3                | 236    | 8         | 192    | 0.127  |
| 0004879 | ligand-dependent nuclear receptor activity | 0                     | 439    | 9             | 2574   | 0.444  | 0                | 239    | 0         | 200    | -      |
| 0004888 | transmembrane receptor activity            | 8                     | 431    | 63            | 2520   | 0.536  | 3                | 236    | 5         | 195    | 0.54   |
| 0004930 | G-protein coupled receptor activity        | 3                     | 436    | 26            | 2557   | 0.706  | 2                | 237    | 1         | 199    | 0.877  |
| 0005057 | receptor signaling protein activity        | 7                     | 432    | 75            | 2508   | 0.161  | 4                | 235    | 3         | 197    | 0.812  |
| 0005102 | receptor binding                           | 12                    | 427    | 55            | 2528   | 0.536  | 8                | 231    | 4         | 196    | 0.57   |
| 0005198 | structural molecule activity               | 29                    | 410    | 165           | 2418   | 0.947  | 17               | 222    | 12        | 188    | 0.784  |
| 0030528 | transcription regulator activity           | 25                    | 414    | 173           | 2410   | 0.496  | 17               | 222    | 8         | 192    | 0.232  |
| 0045182 | translation regulator activity             | 4                     | 435    | 30            | 2553   | 0.83   | 0                | 239    | 4         | 196    | 0.091  |
| 0005215 | transporter activity                       | 43                    | 396    | 208           | 2375   | 0.259  | 22               | 217    | 21        | 179    | 0.769  |
| 0005489 | electron transporter activity              | 3                     | 436    | 26            | 2557   | 0.706  | 2                | 237    | 1         | 199    | 0.877  |
| 0005216 | ion channel activity                       | 6                     | 433    | 45            | 2538   | 0.716  | 2                | 237    | 4         | 196    | 0.527  |
| 0005244 | voltage-gated ion channel activity         | 3                     | 436    | 23            | 2560   | 0.877  | 2                | 237    | 1         | 199    | 0.877  |
| 0005575 | cellular_component                         | 179                   | 260    | 1070          | 1513   | 0.839  | 91               | 148    | 88        | 112    | 0.246  |
| 0005623 | cell                                       | 163                   | 276    | 980           | 1603   | 0.787  | 84               | 155    | 79        | 121    | 0.4    |
| 0005622 | intracellular                              | 124                   | 315    | 771           | 1812   | 0.533  | 63               | 176    | 61        | 139    | 0.394  |
| 0005737 | cytoplasm                                  | 69                    | 370    | 423           | 2160   | 0.783  | 36               | 203    | 33        | 167    | 0.779  |
| 0016023 | cytoplasmic vesicle                        | 6                     | 433    | 37            | 2546   | 0.912  | 4                | 235    | 2         | 198    | 0.847  |
| 0005829 | cytosol                                    | 11                    | 428    | 101           | 2482   | 0.192  | 5                | 234    | 6         | 194    | 0.764  |
| 0005783 | endoplasmic reticulum                      | 7                     | 432    | 50            | 2533   | 0.767  | 2                | 237    | 5         | 195    | 0.316  |
| 0005794 | Golgi apparatus                            | 7                     | 432    | 19            | 2564   | 0.128  | 4                | 235    | 3         | 197    | 0.812  |
| 0005815 | microtubule organizing center              | 3                     | 436    | 6             | 2577   | 0.259  | 1                | 238    | 2         | 198    | 0.877  |
| 0005739 | mitochondrion                              | 14                    | 425    | 95            | 2488   | 0.712  | 6                | 233    | 8         | 192    | 0.541  |
| 0005840 | ribosome                                   | 2                     | 437    | 55            | 2528   | 0.028  | 2                | 237    | 0         | 200    | 0.558  |
| 0005773 | vacuole                                    | 4                     | 435    | 12            | 2571   | 0.403  | 3                | 236    | 1         | 199    | 0.745  |
| 0005764 | lysosome                                   | 1                     | 438    | 5             | 2578   | 0.666  | 0                | 239    | 1         | 199    | 0.929  |
| 0005856 | cytoskeleton                               | 16                    | 423    | 68            | 2515   | 0.3    | 9                | 230    | 7         | 193    | 0.914  |
| 0005694 | chromosome                                 | 7                     | 432    | 31            | 2552   | 0.65   | 2                | 237    | 5         | 195    | 0.316  |
| 0000228 | nuclear chromosome                         | 0                     | 439    | 5             | 2578   | 0.774  | 0                | 239    | 0         | 200    | -      |
| 0005634 | nucleus                                    | 53                    | 386    | 323           | 2260   | 0.861  | 29               | 210    | 24        | 176    | 0.917  |
| 0005635 | nuclear membrane                           | 3                     | 436    | 15            | 2568   | 0.939  | 1                | 238    | 2         | 198    | 0.877  |
| 0005730 | nucleolus                                  | 1                     | 438    | 10            | 2573   | 0.933  | 0                | 239    | 1         | 199    | 0.929  |
| 0005654 | nucleoplasm                                | 11                    | 428    | 63            | 2520   | 0.933  | 3                | 236    | 8         | 192    | 0.127  |
| 0005777 | peroxisome                                 | 1                     | 438    | 8             | 2575   | 0.855  | 0                | 239    | 1         | 199    | 0.929  |
| 0005886 | plasma membrane                            | 21                    | 418    | 126           | 2457   | 0.972  | 11               | 228    | 10        | 190    | 0.976  |
| 0005576 | extracellular region                       | 15                    | 424    | 55            | 2528   | 0.137  | 9                | 230    | 6         | 194    | 0.86   |
| 0005578 | extracellular matrix (sensu Metazoa)       | 10                    | 429    | 25            | 2558   | 0.033  | 4                | 235    | 6         | 194    | 0.544  |

| GO#     | GO term                                                                           | Representational bias |             |               |             |              | Directional bias |            |            |            |              |
|---------|-----------------------------------------------------------------------------------|-----------------------|-------------|---------------|-------------|--------------|------------------|------------|------------|------------|--------------|
|         |                                                                                   | regulated             |             | not regulated |             | $\rho$       | up-reg.          |            | down-reg.  |            | $\rho$       |
|         |                                                                                   | term                  | n.term      | term          | n.term      |              | term             | n.term     | term       | n.term     |              |
| 0008150 | biological_process                                                                | 871                   | 606         | 883           | 629         | 0.779        | 421              | 273        | 450        | 333        | 0.233        |
| 0007610 | behavior                                                                          | 87                    | 1390        | 75            | 1437        | 0.297        | 48               | 646        | 39         | 744        | 0.143        |
| 0030534 | adult behavior                                                                    | 12                    | 1465        | 12            | 1500        | 0.883        | <b>10</b>        | <b>684</b> | <b>2</b>   | <b>781</b> | <b>0.025</b> |
| 0030537 | larval behavior                                                                   | 6                     | 1471        | 3             | 1509        | 0.482        | 3                | 691        | 3          | 780        | 0.794        |
| 0007611 | learning and/or memory                                                            | <b>20</b>             | <b>1457</b> | <b>4</b>      | <b>1508</b> | <b>0.002</b> | 14               | 680        | 6          | 777        | 0.064        |
| 0007612 | learning                                                                          | <b>12</b>             | <b>1465</b> | <b>3</b>      | <b>1509</b> | <b>0.034</b> | 9                | 685        | 3          | 780        | 0.097        |
| 0007613 | memory                                                                            | 8                     | 1469        | 3             | 1509        | 0.212        | 4                | 690        | 4          | 779        | 0.854        |
| 0007626 | locomotory behavior                                                               | 64                    | 1413        | 59            | 1453        | 0.616        | 34               | 660        | 30         | 753        | 0.38         |
| 0007635 | chemosensory behavior                                                             | 12                    | 1465        | 6             | 1506        | 0.218        | 8                | 686        | 4          | 779        | 0.28         |
| 0007622 | rhythmic behavior                                                                 | 7                     | 1470        | 8             | 1504        | 0.964        | 4                | 690        | 3          | 780        | 0.873        |
| 0048512 | circadian behavior                                                                | 6                     | 1471        | 8             | 1504        | 0.823        | 3                | 691        | 3          | 780        | 0.794        |
| 0009987 | cellular process                                                                  | 808                   | 669         | 820           | 692         | 0.824        | 391              | 303        | 417        | 366        | 0.256        |
| 0007154 | cell communication                                                                | <b>265</b>            | <b>1212</b> | <b>224</b>    | <b>1288</b> | <b>0.024</b> | <b>148</b>       | <b>546</b> | <b>117</b> | <b>666</b> | <b>0.002</b> |
| 0007155 | cell adhesion                                                                     | 48                    | 1429        | 42            | 1470        | 0.517        | 27               | 667        | 21         | 762        | 0.246        |
| 0008037 | cell recognition                                                                  | 2                     | 1475        | 0             | 1512        | 0.469        | 2                | 692        | 0          | 783        | 0.427        |
| 0008038 | neuronal cell recognition                                                         | 2                     | 1475        | 0             | 1512        | 0.469        | 2                | 692        | 0          | 783        | 0.427        |
| 0016337 | cell-cell adhesion                                                                | 20                    | 1457        | 19            | 1493        | 0.941        | 12               | 682        | 8          | 775        | 0.343        |
| 0016339 | calcium-dependent cell-cell adhesion                                              | 5                     | 1472        | 2             | 1510        | 0.431        | 2                | 692        | 3          | 780        | 0.892        |
| 0007156 | homophilic cell adhesion                                                          | 6                     | 1471        | 3             | 1509        | 0.482        | 3                | 691        | 3          | 780        | 0.794        |
| 0007160 | cell-matrix adhesion                                                              | 6                     | 1471        | 3             | 1509        | 0.482        | 4                | 690        | 2          | 781        | 0.577        |
| 0007267 | cell-cell signaling                                                               | <b>90</b>             | <b>1387</b> | <b>66</b>     | <b>1446</b> | <b>0.041</b> | <b>52</b>        | <b>642</b> | <b>38</b>  | <b>745</b> | <b>0.045</b> |
| 0019226 | transmission of nerve impulse                                                     | <b>80</b>             | <b>1397</b> | <b>58</b>     | <b>1454</b> | <b>0.049</b> | <b>47</b>        | <b>647</b> | <b>33</b>  | <b>750</b> | <b>0.04</b>  |
| 0007268 | synaptic transmission                                                             | 60                    | 1417        | 41            | 1471        | 0.052        | <b>38</b>        | <b>656</b> | <b>22</b>  | <b>761</b> | <b>0.014</b> |
| 0007270 | nerve-nerve synaptic transmission                                                 | 9                     | 1468        | 7             | 1505        | 0.766        | 6                | 688        | 3          | 780        | 0.394        |
| 0001505 | regulation of neurotransmitter levels                                             | 35                    | 1442        | 25            | 1487        | 0.206        | 19               | 675        | 16         | 767        | 0.481        |
| 0042133 | neurotransmitter metabolism                                                       | 5                     | 1472        | 3             | 1509        | 0.699        | 3                | 691        | 2          | 781        | 0.892        |
| 0007269 | neurotransmitter secretion                                                        | 30                    | 1447        | 23            | 1489        | 0.359        | 16               | 678        | 14         | 769        | 0.604        |
| 0007165 | signal transduction                                                               | 201                   | 1276        | 178           | 1334        | 0.146        | <b>108</b>       | <b>586</b> | <b>93</b>  | <b>690</b> | <b>0.047</b> |
| 0007166 | cell surface receptor linked signal transduction                                  | 76                    | 1401        | 81            | 1431        | 0.859        | <b>41</b>        | <b>653</b> | <b>35</b>  | <b>748</b> | <b>0.258</b> |
| 0007167 | enzyme linked receptor protein signaling pathway                                  | 23                    | 1454        | 23            | 1489        | 0.945        | <b>16</b>        | <b>678</b> | <b>7</b>   | <b>776</b> | <b>0.048</b> |
| 0007178 | transmembrane receptor protein serine/threonine kinase signaling pathway          | 11                    | 1466        | 5             | 1507        | 0.193        | 8                | 686        | 3          | 780        | 0.157        |
| 0007179 | transforming growth factor beta receptor signaling pathway                        | 5                     | 1472        | 4             | 1508        | 0.972        | 3                | 691        | 2          | 781        | 0.892        |
| 0007169 | transmembrane receptor protein tyrosine kinase signaling pathway                  | 13                    | 1464        | 19            | 1493        | 0.411        | 9                | 685        | 4          | 779        | 0.182        |
| 0007173 | epidermal growth factor receptor signaling pathway                                | 5                     | 1472        | 3             | 1509        | 0.699        | 2                | 692        | 3          | 780        | 0.892        |
| 0008286 | insulin receptor signaling pathway                                                | 1                     | 1476        | 3             | 1509        | 0.633        | 1                | 693        | 0          | 783        | 0.952        |
| 0008293 | torso signaling pathway                                                           | 3                     | 1474        | 4             | 1508        | 0.975        | 1                | 693        | 2          | 781        | 0.917        |
| 0007186 | G-protein coupled receptor protein signaling pathway                              | 35                    | 1442        | 36            | 1476        | 0.92         | 18               | 676        | 17         | 766        | 0.718        |
| 0007200 | G-protein signaling, coupled to IP3 second messenger (phospholipase C activating) | 3                     | 1474        | 2             | 1510        | 0.979        | 1                | 693        | 2          | 781        | 0.917        |
| 0007219 | Notch signaling pathway                                                           | 7                     | 1470        | 6             | 1506        | 0.966        | 3                | 691        | 4          | 779        | 0.873        |
| 0007224 | smoothened signaling pathway                                                      | 5                     | 1472        | 1             | 1511        | 0.21         | 3                | 691        | 2          | 781        | 0.892        |
| 0008063 | Toll signaling pathway                                                            | 1                     | 1476        | 3             | 1509        | 0.633        | 0                | 694        | 1          | 782        | 0.952        |
| 0016055 | Wnt receptor signaling pathway                                                    | 8                     | 1469        | 8             | 1504        | 0.839        | 4                | 690        | 4          | 779        | 0.854        |
| 0007242 | intracellular signaling cascade                                                   | 100                   | 1377        | 82            | 1430        | 0.143        | 53               | 641        | 47         | 736        | 0.253        |
| 0007263 | nitric oxide mediated signal transduction                                         | 1                     | 1476        | 3             | 1509        | 0.633        | 1                | 693        | 0          | 783        | 0.952        |
| 0007243 | protein kinase cascade                                                            | 19                    | 1458        | 22            | 1490        | 0.811        | 11               | 683        | 8          | 775        | 0.467        |
| 0007259 | JAK-STAT cascade                                                                  | 2                     | 1475        | 4             | 1508        | 0.704        | 0                | 694        | 2          | 781        | 0.533        |
| 0000165 | MAPKKK cascade                                                                    | 16                    | 1461        | 17            | 1495        | 0.946        | 10               | 684        | 6          | 777        | 0.318        |
| 0019932 | second-messenger-mediated signaling                                               | 14                    | 1463        | 8             | 1504        | 0.261        | 9                | 685        | 5          | 778        | 0.301        |
| 0019722 | calcium-mediated signaling                                                        | 9                     | 1468        | 6             | 1506        | 0.573        | 7                | 687        | 2          | 781        | 0.128        |
| 0048015 | phosphoinositide-mediated signaling                                               | 3                     | 1474        | 2             | 1510        | 0.979        | 1                | 693        | 2          | 781        | 0.917        |
| 0007264 | small GTPase mediated signal transduction                                         | 20                    | 1457        | 24            | 1488        | 0.706        | 12               | 682        | 8          | 775        | 0.343        |
| 0007265 | Ras protein signal transduction                                                   | 7                     | 1470        | 3             | 1509        | 0.323        | 6                | 688        | 1          | 782        | 0.093        |
| 0009966 | regulation of signal transduction                                                 | 21                    | 1456        | 13            | 1499        | 0.202        | 10               | 684        | 11         | 772        | 0.872        |
| 0007275 | development                                                                       | 235                   | 1242        | 225           | 1287        | 0.466        | 118              | 576        | 117        | 666        | 0.313        |
| 0007568 | aging                                                                             | 7                     | 1470        | 4             | 1508        | 0.52         | 3                | 691        | 4          | 779        | 0.873        |
| 0030154 | cell differentiation                                                              | 63                    | 1414        | 56            | 1456        | 0.489        | 33               | 661        | 30         | 753        | 0.455        |
| 0048468 | cell development                                                                  | 42                    | 1435        | 33            | 1479        | 0.299        | 23               | 671        | 19         | 764        | 0.386        |
| 0000904 | cellular morphogenesis during differentiation                                     | 10                    | 1467        | 9             | 1503        | 0.959        | 3                | 691        | 7          | 776        | 0.446        |
| 0042461 | photoreceptor cell development                                                    | 9                     | 1468        | 9             | 1503        | 0.852        | 3                | 691        | 6          | 777        | 0.625        |
| 0042051 | eye photoreceptor development (sensu Endopterygota)                               | 8                     | 1469        | 9             | 1503        | 0.961        | 3                | 691        | 5          | 778        | 0.854        |
| 0045165 | cell fate commitment                                                              | 23                    | 1454        | 26            | 1486        | 0.837        | 11               | 683        | 12         | 771        | 0.897        |

## PC1

| GO#     | GO term                                                        | Representational bias |             |               |             |              | Directional bias |            |            |            |              |
|---------|----------------------------------------------------------------|-----------------------|-------------|---------------|-------------|--------------|------------------|------------|------------|------------|--------------|
|         |                                                                | regulated             |             | not regulated |             | $\rho$       | up-reg.          |            | down-reg.  |            | $\rho$       |
|         |                                                                | term                  | n.term      | term          | n.term      |              | term             | n.term     | term       | n.term     |              |
| 0001709 | cell fate determination                                        | 15                    | 1462        | 15            | 1497        | 0.905        | 8                | 686        | 7          | 776        | 0.814        |
| 0007400 | neuroblast cell fate determination                             | 3                     | 1474        | 5             | 1507        | 0.748        | 2                | 692        | 1          | 782        | 0.917        |
| 0001708 | cell fate specification                                        | 4                     | 1473        | 4             | 1508        | 0.748        | 2                | 692        | 2          | 781        | 0.703        |
| 0007349 | cellularization                                                | 8                     | 1469        | 3             | 1509        | 0.212        | 6                | 688        | 2          | 781        | 0.216        |
| 0040007 | growth                                                         | 16                    | 1461        | 20            | 1492        | 0.665        | 8                | 686        | 8          | 775        | 0.993        |
| 0002164 | larval development                                             | 9                     | 1468        | 8             | 1504        | 0.961        | 3                | 691        | 6          | 777        | 0.625        |
| 0002165 | larval or pupal development (sensu Insecta)                    | 68                    | 1409        | 61            | 1451        | 0.499        | 31               | 663        | 37         | 746        | 0.911        |
| 0007552 | metamorphosis                                                  | 64                    | 1413        | 57            | 1455        | 0.491        | 29               | 665        | 35         | 748        | 0.884        |
| 0009653 | morphogenesis                                                  | 162                   | 1315        | 157           | 1355        | 0.647        | 83               | 611        | 79         | 704        | 0.287        |
| 0002009 | morphogenesis of an epithelium                                 | 17                    | 1460        | 27            | 1485        | 0.197        | 9                | 685        | 8          | 775        | 0.802        |
| 0009887 | organogenesis                                                  | 144                   | 1333        | 138           | 1374        | 0.603        | 72               | 622        | 72         | 711        | 0.5          |
| 0001654 | eye morphogenesis                                              | 31                    | 1446        | 26            | 1486        | 0.532        | 12               | 682        | 19         | 764        | 0.452        |
| 0008406 | gonad development                                              | 5                     | 1472        | 6             | 1506        | 0.969        | 1                | 693        | 4          | 779        | 0.446        |
| 0007444 | imaginal disc development                                      | 49                    | 1428        | 44            | 1468        | 0.592        | 22               | 672        | 27         | 756        | 0.879        |
| 0007494 | midgut development                                             | 3                     | 1474        | 2             | 1510        | 0.979        | 2                | 692        | 1          | 782        | 0.917        |
| 0007517 | muscle development                                             | 18                    | 1459        | 16            | 1496        | 0.809        | 10               | 684        | 8          | 775        | 0.62         |
| 0007399 | neurogenesis                                                   | 78                    | 1399        | 84            | 1428        | 0.802        | 41               | 653        | 37         | 746        | 0.369        |
| 0007409 | axonogenesis                                                   | 20                    | 1457        | 23            | 1489        | 0.818        | 12               | 682        | 8          | 775        | 0.343        |
| 0007411 | axon guidance                                                  | 15                    | 1462        | 18            | 1494        | 0.778        | 7                | 687        | 8          | 775        | 0.814        |
| 0007417 | central nervous system development                             | 19                    | 1458        | 20            | 1492        | 0.941        | 9                | 685        | 10         | 773        | 0.843        |
| 0016358 | dendrite morphogenesis                                         | 6                     | 1471        | 8             | 1504        | 0.823        | 3                | 691        | 3          | 780        | 0.794        |
| 0042063 | gliogenesis                                                    | 6                     | 1471        | 5             | 1507        | 0.969        | 4                | 690        | 2          | 781        | 0.577        |
| 0007422 | peripheral nervous system development                          | 21                    | 1456        | 19            | 1493        | 0.815        | 11               | 683        | 10         | 773        | 0.781        |
| 0050767 | regulation of neurogenesis                                     | 1                     | 1476        | 4             | 1508        | 0.385        | 0                | 694        | 1          | 782        | 0.952        |
| 0007424 | tracheal system development (sensu Insecta)                    | 17                    | 1460        | 20            | 1492        | 0.795        | 7                | 687        | 10         | 773        | 0.812        |
| 0048513 | organ development                                              | 147                   | 1330        | 139           | 1373        | 0.52         | 73               | 621        | 74         | 709        | 0.55         |
| 0007389 | pattern specification                                          | 36                    | 1441        | 40            | 1472        | 0.806        | 19               | 675        | 17         | 766        | 0.592        |
| 0048066 | pigmentation                                                   | 5                     | 1472        | 6             | 1506        | 0.969        | 1                | 693        | 4          | 779        | 0.446        |
| 0009791 | post-embryonic development                                     | 9                     | 1468        | 8             | 1504        | 0.961        | 3                | 691        | 6          | 777        | 0.625        |
| 0009790 | embryonic development                                          | 47                    | 1430        | 53            | 1459        | 0.697        | 18               | 676        | 29         | 754        | 0.287        |
| 0007530 | sex determination                                              | 4                     | 1473        | 6             | 1506        | 0.78         | 2                | 692        | 2          | 781        | 0.703        |
| 0007548 | sex differentiation                                            | 11                    | 1466        | 8             | 1504        | 0.609        | 4                | 690        | 7          | 776        | 0.685        |
| 0019827 | stem cell maintenance                                          | 3                     | 1474        | 5             | 1507        | 0.748        | 2                | 692        | 1          | 782        | 0.917        |
| 0000003 | reproduction                                                   | 76                    | 1401        | 68            | 1444        | 0.458        | 41               | 653        | 35         | 748        | 0.258        |
| 0050793 | regulation of development                                      | 17                    | 1460        | 26            | 1486        | 0.249        | 9                | 685        | 8          | 775        | 0.802        |
| 0007582 | physiological process                                          | 790                   | 687         | 815           | 697         | 0.849        | 374              | 320        | 416        | 367        | 0.81         |
| 0008152 | metabolism                                                     | 555                   | 922         | 611           | 901         | 0.121        | 245              | 449        | 310        | 473        | 0.1          |
| 0009056 | catabolism                                                     | 92                    | 1385        | 117           | 1395        | 0.122        | 44               | 650        | 48         | 735        | 0.953        |
| 0006091 | energy pathways                                                | 57                    | 1420        | 51            | 1461        | 0.539        | <b>40</b>        | <b>654</b> | <b>17</b>  | <b>766</b> | <b>6E-04</b> |
| 0006118 | electron transport                                             | 29                    | 1448        | 26            | 1486        | 0.719        | 18               | 676        | 11         | 772        | 0.145        |
| 0006139 | nucleobase, nucleoside, nucleotide and nucleic acid metabolism | 209                   | 1268        | 223           | 1289        | 0.68         | <b>74</b>        | <b>620</b> | <b>135</b> | <b>648</b> | <b>4E-04</b> |
| 0006259 | DNA metabolism                                                 | <b>27</b>             | <b>1450</b> | <b>52</b>     | <b>1460</b> | <b>0.009</b> | 8                | 686        | 19         | 764        | 0.103        |
| 0006350 | transcription                                                  | 118                   | 1359        | 109           | 1403        | 0.462        | <b>39</b>        | <b>655</b> | <b>79</b>  | <b>704</b> | <b>0.002</b> |
| 0043170 | macromolecule metabolism                                       | <b>278</b>            | <b>1199</b> | <b>350</b>    | <b>1162</b> | <b>0.004</b> | 134              | 560        | 144        | 639        | 0.701        |
| 0019538 | protein metabolism                                             | <b>233</b>            | <b>1244</b> | <b>294</b>    | <b>1218</b> | <b>0.01</b>  | 111              | 583        | 122        | 661        | 0.884        |
| 0006412 | protein biosynthesis                                           | 49                    | 1428        | 61            | 1451        | 0.345        | 23               | 671        | 26         | 757        | 0.89         |
| 0006464 | protein modification                                           | 123                   | 1354        | 133           | 1379        | 0.695        | 51               | 643        | 72         | 711        | 0.235        |
| 0006457 | protein folding                                                | 17                    | 1460        | 26            | 1486        | 0.249        | 8                | 686        | 9          | 774        | 0.812        |
| 0005975 | carbohydrate metabolism                                        | 50                    | 1427        | 57            | 1455        | 0.64         | 27               | 667        | 23         | 760        | 0.386        |
| 0006519 | amino acid and derivative metabolism                           | 36                    | 1441        | 34            | 1478        | 0.826        | 14               | 680        | 22         | 761        | 0.414        |
| 0006629 | lipid metabolism                                               | 44                    | 1433        | 45            | 1467        | 0.918        | 17               | 677        | 27         | 756        | 0.33         |
| 0009308 | amine metabolism                                               | 41                    | 1436        | 40            | 1472        | 0.915        | 18               | 676        | 23         | 760        | 0.808        |
| 0042440 | pigment metabolism                                             | 4                     | 1473        | 8             | 1504        | 0.408        | 1                | 693        | 3          | 780        | 0.703        |
| 0042445 | hormone metabolism                                             | 3                     | 1474        | 4             | 1508        | 0.975        | 1                | 693        | 2          | 781        | 0.917        |
| 0009058 | biosynthesis                                                   | 102                   | 1375        | 102           | 1410        | 0.92         | 43               | 651        | 59         | 724        | 0.363        |
| 0019748 | secondary metabolism                                           | 5                     | 1472        | 9             | 1503        | 0.447        | 1                | 693        | 4          | 779        | 0.446        |
| 0019222 | regulation of metabolism                                       | 121                   | 1356        | 117           | 1395        | 0.696        | 47               | 647        | 74         | 709        | 0.075        |
| 0016265 | death                                                          | 44                    | 1433        | 42            | 1470        | 0.826        | 19               | 675        | 25         | 758        | 0.719        |
| 0008219 | cell death                                                     | 37                    | 1440        | 37            | 1475        | 0.987        | 16               | 678        | 21         | 762        | 0.768        |
| 0016271 | tissue death                                                   | 15                    | 1462        | 12            | 1500        | 0.654        | 7                | 687        | 8          | 775        | 0.814        |
| 0042592 | homeostasis                                                    | 13                    | 1464        | 16            | 1496        | 0.757        | 5                | 689        | 8          | 775        | 0.734        |
| 0019725 | cell homeostasis                                               | 12                    | 1465        | 14            | 1498        | 0.891        | 5                | 689        | 7          | 776        | 0.936        |
| 0050801 | ion homeostasis                                                | 5                     | 1472        | 9             | 1503        | 0.447        | 1                | 693        | 4          | 779        | 0.446        |
| 0043062 | extracellular structure organization and biogenesis            | 6                     | 1471        | 13            | 1499        | 0.184        | 4                | 690        | 2          | 781        | 0.577        |
| 0046903 | secretion                                                      | 55                    | 1422        | 46            | 1466        | 0.353        | 33               | 661        | 22         | 761        | 0.067        |
| 0048511 | rhythmic process                                               | 9                     | 1468        | 8             | 1504        | 0.961        | 6                | 688        | 3          | 780        | 0.394        |

PC1

| GO#     | GO term                                                       | Representational bias |             |               |             |              | Directional bias |            |           |            |              |
|---------|---------------------------------------------------------------|-----------------------|-------------|---------------|-------------|--------------|------------------|------------|-----------|------------|--------------|
|         |                                                               | regulated             |             | not regulated |             | $\rho$       | up-reg.          |            | down-reg. |            | $\rho$       |
|         |                                                               | term                  | n.term      | term          | n.term      |              | term             | n.term     | term      | n.term     |              |
| 0050791 | regulation of physiological process                           | 166                   | 1311        | 181           | 1331        | 0.57         | 72               | 622        | 94        | 689        | 0.364        |
| 0050874 | organismal physiological process                              | <b>134</b>            | <b>1343</b> | <b>98</b>     | <b>1414</b> | <b>0.01</b>  | 72               | 622        | 62        | 721        | 0.121        |
| 0050875 | cellular physiological process                                | 747                   | 730         | 772           | 740         | 0.82         | 353              | 341        | 394       | 389        | 0.875        |
| 0006810 | transport                                                     | 214                   | 1263        | 184           | 1328        | 0.07         | <b>127</b>       | <b>567</b> | <b>87</b> | <b>696</b> | <b>1E-04</b> |
| 0006811 | ion transport                                                 | <b>71</b>             | <b>1406</b> | <b>49</b>     | <b>1463</b> | <b>0.037</b> | <b>49</b>        | <b>645</b> | <b>22</b> | <b>761</b> | <b>2E-04</b> |
| 0006818 | hydrogen transport                                            | 13                    | 1464        | 5             | 1507        | 0.088        | <b>11</b>        | <b>683</b> | <b>2</b>  | <b>781</b> | <b>0.014</b> |
| 0006836 | neurotransmitter transport                                    | 4                     | 1473        | 1             | 1511        | 0.357        | 3                | 691        | 1         | 782        | 0.534        |
| 0006858 | extracellular transport                                       | 6                     | 1471        | 9             | 1503        | 0.637        | 4                | 690        | 2         | 781        | 0.577        |
| 0006869 | lipid transport                                               | 7                     | 1470        | 9             | 1503        | 0.839        | 5                | 689        | 2         | 781        | 0.358        |
| 0008643 | carbohydrate transport                                        | 8                     | 1469        | 7             | 1505        | 0.964        | 3                | 691        | 5         | 778        | 0.854        |
| 0015031 | protein transport                                             | 88                    | 1389        | 92            | 1420        | 0.945        | <b>53</b>        | <b>641</b> | <b>35</b> | <b>748</b> | <b>0.014</b> |
| 0015837 | amine transport                                               | 9                     | 1468        | 3             | 1509        | 0.137        | 5                | 689        | 4         | 779        | 0.856        |
| 0015931 | nucleobase, nucleoside, nucleotide and nucleic acid transport | 6                     | 1471        | 7             | 1505        | 0.966        | 2                | 692        | 4         | 779        | 0.794        |
| 0016192 | vesicle-mediated transport                                    | 62                    | 1415        | 57            | 1455        | 0.614        | <b>37</b>        | <b>657</b> | 25        | 758        | 0.055        |
| 0045045 | secretory pathway                                             | 52                    | 1425        | 43            | 1469        | 0.342        | <b>32</b>        | <b>662</b> | <b>20</b> | <b>763</b> | <b>0.046</b> |
| 0046907 | intracellular transport                                       | 99                    | 1378        | 99            | 1413        | 0.923        | <b>60</b>        | <b>634</b> | <b>39</b> | <b>744</b> | <b>0.007</b> |
| 0051049 | regulation of transport                                       | 11                    | 1466        | 7             | 1505        | 0.448        | <b>9</b>         | <b>685</b> | <b>2</b>  | <b>781</b> | <b>0.043</b> |
| 0008283 | cell proliferation                                            | <b>45</b>             | <b>1432</b> | <b>26</b>     | <b>1486</b> | <b>0.024</b> | 17               | 677        | 28        | 755        | 0.269        |
| 0007049 | cell cycle                                                    | 64                    | 1413        | 64            | 1448        | 0.964        | 33               | 661        | 31        | 752        | 0.534        |
| 0017145 | stem cell division                                            | 5                     | 1472        | 7             | 1505        | 0.804        | 3                | 691        | 2         | 781        | 0.892        |
| 0016043 | cell organization and biogenesis                              | 128                   | 1349        | 147           | 1365        | 0.35         | 63               | 631        | 65        | 718        | 0.662        |
| 0000902 | cellular morphogenesis                                        | 36                    | 1441        | 44            | 1468        | 0.492        | 18               | 676        | 18        | 765        | 0.843        |
| 0006996 | organelle organization and biogenesis                         | 109                   | 1368        | 129           | 1383        | 0.273        | 56               | 638        | 53        | 730        | 0.393        |
| 0007010 | cytoskeleton organization and biogenesis                      | 87                    | 1390        | 83            | 1429        | 0.693        | 50               | 644        | 37        | 746        | 0.056        |
| 0006997 | nuclear organization and biogenesis                           | 3                     | 1474        | 7             | 1505        | 0.361        | 0                | 694        | 3         | 780        | 0.292        |
| 0007028 | cytoplasm organization and biogenesis                         | <b>4</b>              | <b>1473</b> | <b>15</b>     | <b>1497</b> | <b>0.024</b> | 1                | 693        | 3         | 780        | 0.703        |
| 0016044 | membrane organization and biogenesis                          | 5                     | 1472        | 4             | 1508        | 0.972        | 2                | 692        | 3         | 780        | 0.892        |
| 0051128 | regulation of cell organization and biogenesis                | 5                     | 1472        | 6             | 1506        | 0.969        | 3                | 691        | 2         | 781        | 0.892        |
| 0016049 | cell growth                                                   | 3                     | 1474        | 6             | 1506        | 0.527        | 2                | 692        | 1         | 782        | 0.917        |
| 0050896 | response to stimulus                                          | 86                    | 1391        | 95            | 1417        | 0.652        | 39               | 655        | 47        | 736        | 0.84         |
| 0006950 | response to stress                                            | 26                    | 1451        | 33            | 1479        | 0.485        | 9                | 685        | 17        | 766        | 0.281        |
| 0009408 | response to heat                                              | 4                     | 1473        | 6             | 1506        | 0.78         | 2                | 692        | 2         | 781        | 0.703        |
| 0006979 | response to oxidative stress                                  | 1                     | 1476        | 1             | 1511        | 0.49         | 0                | 694        | 1         | 782        | 0.952        |
| 0051179 | localization                                                  | 231                   | 1246        | 198           | 1314        | 0.053        | <b>136</b>       | <b>558</b> | <b>95</b> | <b>688</b> | <b>1E-04</b> |
| 0006403 | RNA localization                                              | 15                    | 1462        | 17            | 1495        | 0.912        | 7                | 687        | 8         | 775        | 0.814        |
| 0008104 | protein localization                                          | 96                    | 1381        | 99            | 1413        | 0.983        | <b>58</b>        | <b>636</b> | <b>38</b> | <b>745</b> | <b>0.009</b> |
| 0051234 | establishment of localization                                 | 217                   | 1260        | 186           | 1326        | 0.063        | <b>128</b>       | <b>566</b> | <b>89</b> | <b>694</b> | <b>2E-04</b> |
| 0051235 | maintenance of localization                                   | 2                     | 1475        | 2             | 1510        | 0.633        | 0                | 694        | 2         | 781        | 0.533        |
| 0050789 | regulation of biological process                              | 196                   | 1281        | 207           | 1305        | 0.777        | 84               | 610        | 112       | 671        | 0.243        |
| 0050790 | regulation of enzyme activity                                 | 9                     | 1468        | 5             | 1507        | 0.397        | 2                | 692        | 7         | 776        | 0.247        |
| 0040029 | regulation of gene expression, epigenetic                     | 10                    | 1467        | 10            | 1502        | 0.864        | 5                | 689        | 5         | 778        | 0.899        |
| 0006306 | DNA methylation                                               | 3                     | 1474        | 4             | 1508        | 0.975        | 1                | 693        | 2         | 781        | 0.917        |
| 0045814 | negative regulation of gene expression, epigenetic            | 2                     | 1475        | 5             | 1507        | 0.468        | 1                | 693        | 1         | 782        | 0.533        |
| 0006342 | chromatin silencing                                           | 2                     | 1475        | 5             | 1507        | 0.468        | 1                | 693        | 1         | 782        | 0.533        |
| 0003674 | molecular_function                                            | 866                   | 611         | 866           | 646         | 0.475        | 424              | 270        | 442       | 341        | 0.079        |
| 0016209 | antioxidant activity                                          | 5                     | 1472        | 4             | 1508        | 0.972        | 4                | 690        | 1         | 782        | 0.302        |
| 0005488 | binding                                                       | 499                   | 978         | 508           | 1004        | 0.945        | 231              | 463        | 268       | 515        | 0.744        |
| 0005509 | calcium ion binding                                           | 33                    | 1444        | 28            | 1484        | 0.542        | 18               | 676        | 15        | 768        | 0.482        |
| 0030246 | carbohydrate binding                                          | 7                     | 1470        | 8             | 1504        | 0.964        | 5                | 689        | 2         | 781        | 0.358        |
| 0008289 | lipid binding                                                 | 15                    | 1462        | 11            | 1501        | 0.515        | 6                | 688        | 9         | 774        | 0.776        |
| 0003676 | nucleic acid binding                                          | 189                   | 1288        | 200           | 1312        | 0.767        | 77               | 617        | 112       | 671        | 0.078        |
| 0003677 | DNA binding                                                   | 100                   | 1377        | 94            | 1418        | 0.589        | <b>33</b>        | <b>661</b> | <b>67</b> | <b>716</b> | <b>0.005</b> |
| 0003682 | chromatin binding                                             | 7                     | 1470        | 16            | 1496        | 0.106        | 1                | 693        | 6         | 777        | 0.174        |
| 0003700 | transcription factor activity                                 | 44                    | 1433        | 42            | 1470        | 0.826        | <b>13</b>        | <b>681</b> | <b>31</b> | <b>752</b> | <b>0.028</b> |
| 0003723 | RNA binding                                                   | 51                    | 1426        | 68            | 1444        | 0.172        | 24               | 670        | 27        | 756        | 0.895        |
| 0008135 | translation factor activity, nucleic acid binding             | 16                    | 1461        | 19            | 1493        | 0.787        | 9                | 685        | 7         | 776        | 0.621        |
| 0000166 | nucleotide binding                                            | 133                   | 1344        | 122           | 1390        | 0.395        | 67               | 627        | 66        | 717        | 0.466        |
| 0005515 | protein binding                                               | 188                   | 1289        | 191           | 1321        | 0.981        | 96               | 598        | 92        | 691        | 0.262        |
| 0008134 | transcription factor binding                                  | 15                    | 1462        | 16            | 1496        | 0.948        | 6                | 688        | 9         | 774        | 0.776        |
| 0008092 | cytoskeletal protein binding                                  | 46                    | 1431        | 42            | 1470        | 0.663        | 25               | 669        | 21        | 762        | 0.386        |
| 0003779 | actin binding                                                 | 24                    | 1453        | 29            | 1483        | 0.639        | 13               | 681        | 11        | 772        | 0.614        |
| 0003824 | catalytic activity                                            | 400                   | 1077        | 439           | 1073        | 0.251        | 201              | 493        | 199       | 584        | 0.141        |
| 0016787 | hydrolase activity                                            | 175                   | 1302        | 197           | 1315        | 0.356        | 89               | 605        | 86        | 697        | 0.312        |
| 0003924 | GTPase activity                                               | 17                    | 1460        | 23            | 1489        | 0.471        | <b>13</b>        | <b>681</b> | <b>4</b>  | <b>779</b> | <b>0.027</b> |
| 0004518 | nuclease activity                                             | <b>3</b>              | <b>1474</b> | <b>12</b>     | <b>1500</b> | <b>0.043</b> | 0                | 694        | 3         | 780        | 0.292        |

## PC1

| GO#     | GO term                                    | Representational bias |             |               |             |              | Directional bias |            |            |            |              |
|---------|--------------------------------------------|-----------------------|-------------|---------------|-------------|--------------|------------------|------------|------------|------------|--------------|
|         |                                            | regulated             |             | not regulated |             | $\rho$       | up-reg.          |            | down-reg.  |            | $\rho$       |
|         |                                            | term                  | n.term      | term          | n.term      |              | term             | n.term     | term       | n.term     |              |
| 0008233 | peptidase activity                         | 54                    | 1423        | 64            | 1448        | 0.474        | 25               | 669        | 29         | 754        | 0.972        |
| 0004721 | phosphoprotein phosphatase activity        | 11                    | 1466        | 19            | 1493        | 0.222        | 4                | 690        | 7          | 776        | 0.685        |
| 0016740 | transferase activity                       | 117                   | 1360        | 124           | 1388        | 0.831        | 51               | 643        | 66         | 717        | 0.502        |
| 0016301 | kinase activity                            | 73                    | 1404        | 62            | 1450        | 0.308        | 36               | 658        | 37         | 746        | 0.773        |
| 0004672 | protein kinase activity                    | 55                    | 1422        | 40            | 1472        | 0.115        | 28               | 666        | 27         | 756        | 0.648        |
| 0030234 | enzyme regulator activity                  | 58                    | 1419        | 47            | 1465        | 0.265        | 29               | 665        | 29         | 754        | 0.738        |
| 0003774 | motor activity                             | 19                    | 1458        | 9             | 1503        | 0.077        | 12               | 682        | 7          | 776        | 0.234        |
| 0004871 | signal transducer activity                 | 139                   | 1338        | 117           | 1395        | 0.117        | 70               | 624        | 69         | 714        | 0.455        |
| 0004872 | receptor activity                          | 58                    | 1419        | 51            | 1461        | 0.478        | 32               | 662        | 26         | 757        | 0.254        |
| 0004879 | ligand-dependent nuclear receptor activity | 7                     | 1470        | 2             | 1510        | 0.17         | 2                | 692        | 5          | 778        | 0.549        |
| 0004888 | transmembrane receptor activity            | 37                    | 1440        | 37            | 1475        | 0.987        | <b>24</b>        | <b>670</b> | <b>13</b>  | <b>770</b> | <b>0.041</b> |
| 0004930 | G-protein coupled receptor activity        | 16                    | 1461        | 14            | 1498        | 0.804        | 10               | 684        | 6          | 777        | 0.318        |
| 0005057 | receptor signaling protein activity        | 47                    | 1430        | 33            | 1479        | 0.114        | 21               | 673        | 26         | 757        | 0.862        |
| 0005102 | receptor binding                           | 35                    | 1442        | 34            | 1478        | 0.922        | 16               | 678        | 19         | 764        | 0.985        |
| 0005198 | structural molecule activity               | 82                    | 1395        | 80            | 1432        | 0.815        | <b>48</b>        | <b>646</b> | <b>34</b>  | <b>749</b> | <b>0.041</b> |
| 0030528 | transcription regulator activity           | 104                   | 1373        | 95            | 1417        | 0.448        | <b>33</b>        | <b>661</b> | <b>71</b>  | <b>712</b> | <b>0.002</b> |
| 0045182 | translation regulator activity             | 16                    | 1461        | 19            | 1493        | 0.787        | 9                | 685        | 7          | 776        | 0.621        |
| 0005215 | transporter activity                       | <b>142</b>            | <b>1335</b> | <b>111</b>    | <b>1401</b> | <b>0.03</b>  | <b>91</b>        | <b>603</b> | <b>51</b>  | <b>732</b> | <b>3E-05</b> |
| 0005489 | electron transporter activity              | 12                    | 1465        | 17            | 1495        | 0.495        | 8                | 686        | 4          | 779        | 0.28         |
| 0005216 | ion channel activity                       | 30                    | 1447        | 22            | 1490        | 0.287        | <b>23</b>        | <b>671</b> | <b>7</b>   | <b>776</b> | <b>0.002</b> |
| 0005244 | voltage-gated ion channel activity         | 16                    | 1461        | 10            | 1502        | 0.296        | <b>12</b>        | <b>682</b> | <b>4</b>   | <b>779</b> | <b>0.045</b> |
| 0005575 | cellular_component                         | 613                   | 864         | 610           | 902         | 0.544        | <b>328</b>       | <b>366</b> | <b>285</b> | <b>498</b> | <b>3E-05</b> |
| 0005623 | cell                                       | 559                   | 918         | 553           | 959         | 0.495        | <b>297</b>       | <b>397</b> | <b>262</b> | <b>521</b> | <b>3E-04</b> |
| 0005622 | intracellular                              | 428                   | 1049        | 429           | 1083        | 0.745        | <b>222</b>       | <b>472</b> | <b>206</b> | <b>577</b> | <b>0.019</b> |
| 0005737 | cytoplasm                                  | 228                   | 1249        | 230           | 1282        | 0.904        | <b>143</b>       | <b>551</b> | <b>85</b>  | <b>698</b> | <b>3E-07</b> |
| 0016023 | cytoplasmic vesicle                        | 21                    | 1456        | 20            | 1492        | 0.94         | 12               | 682        | 9          | 774        | 0.472        |
| 0005829 | cytosol                                    | 34                    | 1443        | 45            | 1467        | 0.301        | 21               | 673        | 13         | 770        | 0.116        |
| 0005783 | endoplasmic reticulum                      | 25                    | 1452        | 32            | 1480        | 0.476        | 13               | 681        | 12         | 771        | 0.761        |
| 0005794 | Golgi apparatus                            | 13                    | 1464        | 12            | 1500        | 0.953        | 6                | 688        | 7          | 776        | 0.827        |
| 0005815 | microtubule organizing center              | 3                     | 1474        | 6             | 1506        | 0.527        | 1                | 693        | 2          | 781        | 0.917        |
| 0005739 | mitochondrion                              | 62                    | 1415        | 43            | 1469        | 0.056        | <b>46</b>        | <b>648</b> | <b>16</b>  | <b>767</b> | <b>2E-05</b> |
| 0005840 | ribosome                                   | 9                     | 1468        | 15            | 1497        | 0.333        | 6                | 688        | 3          | 780        | 0.394        |
| 0005773 | vacuole                                    | 7                     | 1470        | 7             | 1505        | 0.823        | <b>7</b>         | <b>687</b> | <b>0</b>   | <b>783</b> | <b>0.015</b> |
| 0005764 | lysosome                                   | 1                     | 1476        | 4             | 1508        | 0.385        | 1                | 693        | 0          | 783        | 0.952        |
| 0005856 | cytoskeleton                               | 46                    | 1431        | 39            | 1473        | 0.441        | 26               | 668        | 20         | 763        | 0.243        |
| 0005694 | chromosome                                 | <b>13</b>             | <b>1464</b> | <b>27</b>     | <b>1485</b> | <b>0.046</b> | 5                | 689        | 8          | 775        | 0.734        |
| 0000228 | nuclear chromosome                         | 1                     | 1476        | 4             | 1508        | 0.385        | 0                | 694        | 1          | 782        | 0.952        |
| 0005634 | nucleus                                    | 178                   | 1299        | 194           | 1318        | 0.555        | <b>63</b>        | <b>631</b> | <b>115</b> | <b>668</b> | <b>0.001</b> |
| 0005635 | nuclear membrane                           | 10                    | 1467        | 7             | 1505        | 0.593        | 2                | 692        | 8          | 775        | 0.162        |
| 0005730 | nucleolus                                  | 3                     | 1474        | 8             | 1504        | 0.242        | 1                | 693        | 2          | 781        | 0.917        |
| 0005654 | nucleoplasm                                | 29                    | 1448        | 43            | 1469        | 0.147        | 9                | 685        | 20         | 763        | 0.121        |
| 0005777 | peroxisome                                 | 4                     | 1473        | 5             | 1507        | 0.972        | 1                | 693        | 3          | 780        | 0.703        |
| 0005886 | plasma membrane                            | 77                    | 1400        | 79            | 1433        | 0.946        | <b>52</b>        | <b>642</b> | <b>25</b>  | <b>758</b> | <b>3E-04</b> |
| 0005576 | extracellular region                       | 42                    | 1435        | 34            | 1478        | 0.359        | <b>28</b>        | <b>666</b> | <b>14</b>  | <b>769</b> | <b>0.015</b> |
| 0005578 | extracellular matrix (sensu Metazoa)       | 21                    | 1456        | 14            | 1498        | 0.276        | <b>16</b>        | <b>678</b> | <b>5</b>   | <b>778</b> | <b>0.013</b> |

| GO#     | GO term                                                                           | Representational bias |             |               |             |              | Directional bias |            |            |            |              |
|---------|-----------------------------------------------------------------------------------|-----------------------|-------------|---------------|-------------|--------------|------------------|------------|------------|------------|--------------|
|         |                                                                                   | regulated             |             | not regulated |             | $\rho$       | up-reg.          |            | down-reg.  |            | $\rho$       |
|         |                                                                                   | term                  | n.term      | term          | n.term      |              | term             | n.term     | term       | n.term     |              |
| 0008150 | biological_process                                                                | 867                   | 628         | 887           | 607         | 0.467        | 467              | 341        | 400        | 287        | 0.909        |
| 0007610 | behavior                                                                          | 91                    | 1404        | 71            | 1423        | 0.126        | <b>39</b>        | <b>769</b> | <b>52</b>  | <b>635</b> | <b>0.036</b> |
| 0030534 | adult behavior                                                                    | 15                    | 1480        | 9             | 1485        | 0.306        | 5                | 803        | 10         | 677        | 0.175        |
| 0030537 | larval behavior                                                                   | 6                     | 1489        | 3             | 1491        | 0.505        | 1                | 807        | 5          | 682        | 0.153        |
| 0007611 | learning and/or memory                                                            | 17                    | 1478        | 7             | 1487        | 0.065        | 7                | 801        | 10         | 677        | 0.409        |
| 0007612 | learning                                                                          | <b>12</b>             | <b>1483</b> | <b>3</b>      | <b>1491</b> | <b>0.038</b> | 5                | 803        | 7          | 680        | 0.566        |
| 0007613 | memory                                                                            | 6                     | 1489        | 5             | 1489        | 0.999        | 3                | 805        | 3          | 684        | 0.833        |
| 0007626 | locomotory behavior                                                               | 65                    | 1430        | 58            | 1436        | 0.583        | 28               | 780        | 37         | 650        | 0.092        |
| 0007635 | chemosensory behavior                                                             | <b>14</b>             | <b>1481</b> | <b>4</b>      | <b>1490</b> | <b>0.033</b> | 6                | 802        | 8          | 679        | 0.566        |
| 0007622 | rhythmic behavior                                                                 | 4                     | 1491        | 11            | 1483        | 0.12         | 3                | 805        | 1          | 686        | 0.734        |
| 0048512 | circadian behavior                                                                | 4                     | 1491        | 10            | 1484        | 0.18         | 3                | 805        | 1          | 686        | 0.734        |
| 0009987 | cellular process                                                                  | 802                   | 693         | 826           | 668         | 0.387        | 434              | 374        | 368        | 319        | 0.996        |
| 0007154 | cell communication                                                                | 258                   | 1237        | 231           | 1263        | 0.201        | <b>108</b>       | <b>700</b> | <b>150</b> | <b>537</b> | <b>2E-05</b> |
| 0007155 | cell adhesion                                                                     | 51                    | 1444        | 39            | 1455        | 0.24         | <b>20</b>        | <b>788</b> | <b>31</b>  | <b>656</b> | <b>0.043</b> |
| 0008037 | cell recognition                                                                  | 2                     | 1493        | 0             | 1494        | 0.48         | 0                | 808        | 2          | 685        | 0.409        |
| 0008038 | neuronal cell recognition                                                         | 2                     | 1493        | 0             | 1494        | 0.48         | 0                | 808        | 2          | 685        | 0.409        |
| 0016337 | cell-cell adhesion                                                                | 24                    | 1471        | 15            | 1479        | 0.198        | 10               | 798        | 14         | 673        | 0.308        |
| 0016339 | calcium-dependent cell-cell adhesion                                              | 3                     | 1492        | 4             | 1490        | 0.999        | 1                | 807        | 2          | 685        | 0.888        |
| 0007156 | homophilic cell adhesion                                                          | 5                     | 1490        | 4             | 1490        | 0.999        | 2                | 806        | 3          | 684        | 0.856        |
| 0007160 | cell-matrix adhesion                                                              | 6                     | 1489        | 3             | 1491        | 0.505        | 2                | 806        | 4          | 683        | 0.542        |
| 0007267 | cell-cell signaling                                                               | 82                    | 1413        | 74            | 1420        | 0.568        | <b>31</b>        | <b>777</b> | <b>51</b>  | <b>636</b> | <b>0.003</b> |
| 0019226 | transmission of nerve impulse                                                     | 69                    | 1426        | 69            | 1425        | 0.934        | <b>26</b>        | <b>782</b> | <b>43</b>  | <b>644</b> | <b>0.008</b> |
| 0007268 | synaptic transmission                                                             | 51                    | 1444        | 50            | 1444        | 0.997        | <b>16</b>        | <b>792</b> | <b>35</b>  | <b>652</b> | <b>0.002</b> |
| 0007270 | nerve-nerve synaptic transmission                                                 | 6                     | 1489        | 10            | 1484        | 0.451        | 1                | 807        | 5          | 682        | 0.153        |
| 0001505 | regulation of neurotransmitter levels                                             | 30                    | 1465        | 30            | 1464        | 0.898        | <b>8</b>         | <b>800</b> | <b>22</b>  | <b>665</b> | <b>0.004</b> |
| 0042133 | neurotransmitter metabolism                                                       | 4                     | 1491        | 4             | 1490        | 0.724        | 1                | 807        | 3          | 684        | 0.506        |
| 0007269 | neurotransmitter secretion                                                        | 26                    | 1469        | 27            | 1467        | 0.998        | <b>7</b>         | <b>801</b> | <b>19</b>  | <b>668</b> | <b>0.009</b> |
| 0007165 | signal transduction                                                               | 199                   | 1296        | 180           | 1314        | 0.326        | <b>84</b>        | <b>724</b> | <b>115</b> | <b>572</b> | <b>4E-04</b> |
| 0007166 | cell surface receptor linked signal transduction                                  | 75                    | 1420        | 82            | 1412        | 0.62         | 33               | 775        | 42         | 645        | 0.094        |
| 0007167 | enzyme linked receptor protein signaling pathway                                  | 29                    | 1466        | 17            | 1477        | 0.103        | 12               | 796        | 17         | 670        | 0.232        |
| 0007178 | transmembrane receptor protein serine/threonine kinase signaling pathway          | 12                    | 1483        | 4             | 1490        | 0.08         | 4                | 804        | 8          | 679        | 0.248        |
| 0007179 | transforming growth factor beta receptor signaling pathway                        | 7                     | 1488        | 2             | 1492        | 0.182        | 1                | 807        | 6          | 681        | 0.083        |
| 0007169 | transmembrane receptor protein tyrosine kinase signaling pathway                  | 18                    | 1477        | 14            | 1480        | 0.595        | 8                | 800        | 10         | 677        | 0.559        |
| 0007173 | epidermal growth factor receptor signaling pathway                                | 6                     | 1489        | 2             | 1492        | 0.289        | 1                | 807        | 5          | 682        | 0.153        |
| 0008286 | insulin receptor signaling pathway                                                | 1                     | 1494        | 3             | 1491        | 0.616        | 1                | 807        | 0          | 687        | 0.935        |
| 0008293 | torso signaling pathway                                                           | 3                     | 1492        | 4             | 1490        | 0.999        | 0                | 808        | 3          | 684        | 0.193        |
| 0007186 | G-protein coupled receptor protein signaling pathway                              | 30                    | 1465        | 41            | 1453        | 0.229        | 13               | 795        | 17         | 670        | 0.315        |
| 0007200 | G-protein signaling, coupled to IP3 second messenger (phospholipase C activating) | 1                     | 1494        | 4             | 1490        | 0.37         | 1                | 807        | 0          | 687        | 0.935        |
| 0007219 | Notch signaling pathway                                                           | 8                     | 1487        | 5             | 1489        | 0.579        | 4                | 804        | 4          | 683        | 0.9          |
| 0007224 | smoothened signaling pathway                                                      | 1                     | 1494        | 5             | 1489        | 0.22         | 1                | 807        | 0          | 687        | 0.935        |
| 0008063 | Toll signaling pathway                                                            | 1                     | 1494        | 3             | 1491        | 0.616        | 0                | 808        | 1          | 686        | 0.935        |
| 0016055 | Wnt receptor signaling pathway                                                    | 9                     | 1486        | 7             | 1487        | 0.803        | 4                | 804        | 5          | 682        | 0.807        |
| 0007242 | intracellular signaling cascade                                                   | 90                    | 1405        | 92            | 1402        | 0.935        | 42               | 766        | 48         | 639        | 0.18         |
| 0007263 | nitric oxide mediated signal transduction                                         | 3                     | 1492        | 1             | 1493        | 0.617        | 0                | 808        | 3          | 684        | 0.193        |
| 0007243 | protein kinase cascade                                                            | 20                    | 1475        | 21            | 1473        | 0.998        | 10               | 798        | 10         | 677        | 0.889        |
| 0007259 | JAK-STAT cascade                                                                  | 3                     | 1492        | 3             | 1491        | 0.683        | 3                | 805        | 0          | 687        | 0.308        |
| 0000165 | MAPKKK cascade                                                                    | 16                    | 1479        | 17            | 1477        | 0.998        | 6                | 802        | 10         | 677        | 0.279        |
| 0019932 | second-messenger-mediated signaling                                               | 11                    | 1484        | 11            | 1483        | 0.832        | 7                | 801        | 4          | 683        | 0.736        |
| 0019722 | calcium-mediated signaling                                                        | 9                     | 1486        | 6             | 1488        | 0.606        | 6                | 802        | 3          | 684        | 0.67         |
| 0048015 | phosphoinositide-mediated signaling                                               | 1                     | 1494        | 4             | 1490        | 0.37         | 1                | 807        | 0          | 687        | 0.935        |
| 0007264 | small GTPase mediated signal transduction                                         | 23                    | 1472        | 21            | 1473        | 0.881        | 11               | 797        | 12         | 675        | 0.695        |
| 0007265 | Ras protein signal transduction                                                   | 4                     | 1491        | 6             | 1488        | 0.751        | 3                | 805        | 1          | 686        | 0.734        |
| 0009966 | regulation of signal transduction                                                 | 18                    | 1477        | 16            | 1478        | 0.865        | 7                | 801        | 11         | 676        | 0.289        |
| 0007275 | development                                                                       | 224                   | 1271        | 236           | 1258        | 0.572        | 111              | 697        | 113        | 574        | 0.164        |
| 0007568 | aging                                                                             | 5                     | 1490        | 6             | 1488        | 0.999        | 3                | 805        | 2          | 685        | 0.856        |
| 0030154 | cell differentiation                                                              | 60                    | 1435        | 59            | 1435        | 0.997        | 27               | 781        | 33         | 654        | 0.193        |
| 0048468 | cell development                                                                  | 33                    | 1462        | 42            | 1452        | 0.348        | 14               | 794        | 19         | 668        | 0.239        |
| 0000904 | cellular morphogenesis during differentiation                                     | 9                     | 1486        | 10            | 1484        | 0.999        | 2                | 806        | 7          | 680        | 0.113        |
| 0042461 | photoreceptor cell development                                                    | 9                     | 1486        | 9             | 1485        | 0.814        | 2                | 806        | 7          | 680        | 0.113        |
| 0042051 | eye photoreceptor development (sensu Endopterygota)                               | 8                     | 1487        | 9             | 1485        | 0.999        | 2                | 806        | 6          | 681        | 0.195        |
| 0045165 | cell fate commitment                                                              | 26                    | 1469        | 23            | 1471        | 0.775        | 10               | 798        | 16         | 671        | 0.158        |

| GO#     | GO term                                                        | Representational bias |             |               |             |              | Directional bias |            |            |            |              |
|---------|----------------------------------------------------------------|-----------------------|-------------|---------------|-------------|--------------|------------------|------------|------------|------------|--------------|
|         |                                                                | regulated             |             | not regulated |             | $\rho$       | up-reg.          |            | down-reg.  |            | $\rho$       |
|         |                                                                | term                  | n.term      | term          | n.term      |              | term             | n.term     | term       | n.term     |              |
| 0001709 | cell fate determination                                        | 13                    | 1482        | 17            | 1477        | 0.581        | 4                | 804        | 9          | 678        | 0.158        |
| 0007400 | neuroblast cell fate determination                             | 4                     | 1491        | 4             | 1490        | 0.724        | 3                | 805        | 1          | 686        | 0.734        |
| 0001708 | cell fate specification                                        | 4                     | 1491        | 4             | 1490        | 0.724        | 1                | 807        | 3          | 684        | 0.506        |
| 0007349 | cellularization                                                | 5                     | 1490        | 6             | 1488        | 0.999        | 1                | 807        | 4          | 683        | 0.28         |
| 0040007 | growth                                                         | 19                    | 1476        | 17            | 1477        | 0.868        | 10               | 798        | 9          | 678        | 0.915        |
| 0002164 | larval development                                             | 13                    | 1482        | 4             | 1490        | 0.052        | 6                | 802        | 7          | 680        | 0.769        |
| 0002165 | larval or pupal development (sensu Insecta)                    | 69                    | 1426        | 60            | 1434        | 0.474        | 36               | 772        | 33         | 654        | 0.845        |
| 0007552 | metamorphosis                                                  | 63                    | 1432        | 58            | 1436        | 0.713        | 33               | 775        | 30         | 657        | 0.887        |
| 0009653 | morphogenesis                                                  | 159                   | 1336        | 160           | 1334        | 0.995        | 74               | 734        | 85         | 602        | 0.054        |
| 0002009 | morphogenesis of an epithelium                                 | 27                    | 1468        | 17            | 1477        | 0.172        | 10               | 798        | 17         | 670        | 0.111        |
| 0009887 | organogenesis                                                  | 144                   | 1351        | 138           | 1356        | 0.759        | 68               | 740        | 76         | 611        | 0.101        |
| 0001654 | eye morphogenesis                                              | 31                    | 1464        | 26            | 1468        | 0.594        | 15               | 793        | 16         | 671        | 0.648        |
| 0008406 | gonad development                                              | 6                     | 1489        | 5             | 1489        | 0.999        | 4                | 804        | 2          | 685        | 0.833        |
| 0007444 | imaginal disc development                                      | 51                    | 1444        | 42            | 1452        | 0.401        | 25               | 783        | 26         | 661        | 0.555        |
| 0007494 | midgut development                                             | 3                     | 1492        | 2             | 1492        | 0.999        | 2                | 806        | 1          | 686        | 0.888        |
| 0007517 | muscle development                                             | 18                    | 1477        | 16            | 1478        | 0.865        | 6                | 802        | 12         | 675        | 0.124        |
| 0007399 | neurogenesis                                                   | 89                    | 1406        | 73            | 1421        | 0.227        | 40               | 768        | 49         | 638        | 0.095        |
| 0007409 | axonogenesis                                                   | 20                    | 1475        | 23            | 1471        | 0.757        | 9                | 799        | 11         | 676        | 0.554        |
| 0007411 | axon guidance                                                  | 15                    | 1480        | 18            | 1476        | 0.725        | 7                | 801        | 8          | 679        | 0.752        |
| 0007417 | central nervous system development                             | 18                    | 1477        | 21            | 1473        | 0.746        | 10               | 798        | 8          | 679        | 0.913        |
| 0016358 | dendrite morphogenesis                                         | 6                     | 1489        | 8             | 1486        | 0.788        | 2                | 806        | 4          | 683        | 0.542        |
| 0042063 | gliogenesis                                                    | 7                     | 1488        | 4             | 1490        | 0.546        | 3                | 805        | 4          | 683        | 0.829        |
| 0007422 | peripheral nervous system development                          | 18                    | 1477        | 22            | 1472        | 0.631        | 7                | 801        | 11         | 676        | 0.289        |
| 0050767 | regulation of neurogenesis                                     | 2                     | 1493        | 3             | 1491        | 0.999        | 1                | 807        | 1          | 686        | 0.552        |
| 0007424 | tracheal system development (sensu Insecta)                    | 21                    | 1474        | 16            | 1478        | 0.509        | <b>6</b>         | <b>802</b> | <b>15</b>  | <b>672</b> | <b>0.032</b> |
| 0048513 | organ development                                              | 146                   | 1349        | 140           | 1354        | 0.76         | 69               | 739        | 77         | 610        | 0.1          |
| 0007389 | pattern specification                                          | 36                    | 1459        | 40            | 1454        | 0.725        | 16               | 792        | 20         | 667        | 0.317        |
| 0048066 | pigmentation                                                   | 7                     | 1488        | 4             | 1490        | 0.546        | 3                | 805        | 4          | 683        | 0.829        |
| 0009791 | post-embryonic development                                     | 13                    | 1482        | 4             | 1490        | 0.052        | 6                | 802        | 7          | 680        | 0.769        |
| 0009790 | embryonic development                                          | 53                    | 1442        | 47            | 1447        | 0.613        | <b>21</b>        | <b>787</b> | <b>32</b>  | <b>655</b> | <b>0.045</b> |
| 0007530 | sex determination                                              | 6                     | 1489        | 4             | 1490        | 0.752        | 5                | 803        | 1          | 686        | 0.302        |
| 0007548 | sex differentiation                                            | 10                    | 1485        | 9             | 1485        | 0.999        | 6                | 802        | 4          | 683        | 0.952        |
| 0019827 | stem cell maintenance                                          | 7                     | 1488        | 1             | 1493        | 0.077        | 3                | 805        | 4          | 683        | 0.829        |
| 0000003 | reproduction                                                   | 77                    | 1418        | 67            | 1427        | 0.444        | 33               | 775        | 44         | 643        | 0.057        |
| 0050793 | regulation of development                                      | 22                    | 1473        | 21            | 1473        | 0.998        | 10               | 798        | 12         | 675        | 0.549        |
| 0007582 | physiological process                                          | 783                   | 712         | 822           | 672         | 0.157        | 434              | 374        | 349        | 338        | 0.284        |
| 0008152 | metabolism                                                     | 577                   | 918         | 589           | 905         | 0.669        | <b>348</b>       | <b>460</b> | <b>229</b> | <b>458</b> | <b>1E-04</b> |
| 0009056 | catabolism                                                     | 100                   | 1395        | 109           | 1385        | 0.563        | 60               | 748        | 40         | 647        | 0.257        |
| 0006091 | energy pathways                                                | 50                    | 1445        | 58            | 1436        | 0.49         | 29               | 779        | 21         | 666        | 0.67         |
| 0006118 | electron transport                                             | 30                    | 1465        | 25            | 1469        | 0.588        | 17               | 791        | 13         | 674        | 0.916        |
| 0006139 | nucleobase, nucleoside, nucleotide and nucleic acid metabolism | 212                   | 1283        | 220           | 1274        | 0.71         | 127              | 681        | 85         | 602        | 0.076        |
| 0006259 | DNA metabolism                                                 | 41                    | 1454        | 38            | 1456        | 0.822        | 25               | 783        | 16         | 671        | 0.457        |
| 0006350 | transcription                                                  | 122                   | 1373        | 105           | 1389        | 0.272        | 72               | 736        | 50         | 637        | 0.292        |
| 0043170 | macromolecule metabolism                                       | 316                   | 1179        | 312           | 1182        | 0.9          | 185              | 623        | 131        | 556        | 0.081        |
| 0019538 | protein metabolism                                             | 270                   | 1225        | 257           | 1237        | 0.57         | <b>161</b>       | <b>647</b> | <b>109</b> | <b>578</b> | <b>0.049</b> |
| 0006412 | protein biosynthesis                                           | 59                    | 1436        | 51            | 1443        | 0.499        | <b>40</b>        | <b>768</b> | <b>19</b>  | <b>668</b> | <b>0.042</b> |
| 0006464 | protein modification                                           | 132                   | 1363        | 124           | 1370        | 0.651        | 77               | 731        | 55         | 632        | 0.345        |
| 0006457 | protein folding                                                | <b>12</b>             | <b>1483</b> | <b>31</b>     | <b>1463</b> | <b>0.006</b> | 8                | 800        | 4          | 683        | 0.555        |
| 0005975 | carbohydrate metabolism                                        | 52                    | 1443        | 55            | 1439        | 0.841        | 27               | 781        | 25         | 662        | 0.864        |
| 0006519 | amino acid and derivative metabolism                           | 32                    | 1463        | 38            | 1456        | 0.543        | 19               | 789        | 13         | 674        | 0.666        |
| 0006629 | lipid metabolism                                               | 49                    | 1446        | 40            | 1454        | 0.391        | <b>35</b>        | <b>773</b> | <b>14</b>  | <b>673</b> | <b>0.019</b> |
| 0009308 | amine metabolism                                               | 38                    | 1457        | 43            | 1451        | 0.65         | 20               | 788        | 18         | 669        | 0.99         |
| 0042440 | pigment metabolism                                             | 5                     | 1490        | 7             | 1487        | 0.771        | 4                | 804        | 1          | 686        | 0.473        |
| 0042445 | hormone metabolism                                             | 3                     | 1492        | 4             | 1490        | 0.999        | 3                | 805        | 0          | 687        | 0.308        |
| 0009058 | biosynthesis                                                   | 99                    | 1396        | 105           | 1389        | 0.713        | <b>64</b>        | <b>744</b> | <b>35</b>  | <b>652</b> | <b>0.037</b> |
| 0019748 | secondary metabolism                                           | 7                     | 1488        | 7             | 1487        | 0.79         | 5                | 803        | 2          | 685        | 0.586        |
| 0019222 | regulation of metabolism                                       | 121                   | 1374        | 117           | 1377        | 0.844        | 69               | 739        | 52         | 635        | 0.555        |
| 0016265 | death                                                          | 45                    | 1450        | 41            | 1453        | 0.745        | 28               | 780        | 17         | 670        | 0.334        |
| 0008219 | cell death                                                     | 40                    | 1455        | 34            | 1460        | 0.558        | 25               | 783        | 15         | 672        | 0.354        |
| 0016271 | tissue death                                                   | 15                    | 1480        | 12            | 1482        | 0.7          | 9                | 799        | 6          | 681        | 0.838        |
| 0042592 | homeostasis                                                    | <b>22</b>             | <b>1473</b> | <b>7</b>      | <b>1487</b> | <b>0.009</b> | 14               | 794        | 8          | 679        | 0.488        |
| 0019725 | cell homeostasis                                               | <b>20</b>             | <b>1475</b> | <b>6</b>      | <b>1488</b> | <b>0.01</b>  | 13               | 795        | 7          | 680        | 0.445        |
| 0050801 | ion homeostasis                                                | <b>12</b>             | <b>1483</b> | <b>2</b>      | <b>1492</b> | <b>0.016</b> | 8                | 800        | 4          | 683        | 0.555        |
| 0043062 | extracellular structure organization and biogenesis            | 13                    | 1482        | 6             | 1488        | 0.168        | 4                | 804        | 9          | 678        | 0.158        |
| 0046903 | secretion                                                      | 46                    | 1449        | 55            | 1439        | 0.416        | <b>14</b>        | <b>794</b> | <b>32</b>  | <b>655</b> | <b>0.002</b> |
| 0048511 | rhythmic process                                               | 6                     | 1489        | 11            | 1483        | 0.33         | 5                | 803        | 1          | 686        | 0.302        |

## PC2

| GO#     | GO term                                                       | Representational bias |             |               |             |              | Directional bias |            |            |            |              |
|---------|---------------------------------------------------------------|-----------------------|-------------|---------------|-------------|--------------|------------------|------------|------------|------------|--------------|
|         |                                                               | regulated             |             | not regulated |             | $\rho$       | up-reg.          |            | down-reg.  |            | $\rho$       |
|         |                                                               | term                  | n.term      | term          | n.term      |              | term             | n.term     | term       | n.term     |              |
| 0050791 | regulation of physiological process                           | 170                   | 1325        | 177           | 1317        | 0.727        | 95               | 713        | 75         | 612        | 0.668        |
| 0050874 | organismal physiological process                              | 119                   | 1376        | 113           | 1381        | 0.736        | 57               | 751        | 62         | 625        | 0.191        |
| 0050875 | cellular physiological process                                | 739                   | 756         | 780           | 714         | 0.138        | 411              | 397        | 328        | 359        | 0.25         |
| 0006810 | transport                                                     | 192                   | 1303        | 206           | 1288        | 0.48         | <b>85</b>        | <b>723</b> | <b>107</b> | <b>580</b> | <b>0.005</b> |
| 0006811 | ion transport                                                 | 65                    | 1430        | 55            | 1439        | 0.404        | <b>26</b>        | <b>782</b> | <b>39</b>  | <b>648</b> | <b>0.028</b> |
| 0006818 | hydrogen transport                                            | 7                     | 1488        | 11            | 1483        | 0.477        | 2                | 806        | 5          | 682        | 0.329        |
| 0006836 | neurotransmitter transport                                    | 5                     | 1490        | 0             | 1494        | 0.074        | 1                | 807        | 4          | 683        | 0.28         |
| 0006858 | extracellular transport                                       | 10                    | 1485        | 5             | 1489        | 0.301        | 4                | 804        | 6          | 681        | 0.565        |
| 0006869 | lipid transport                                               | 10                    | 1485        | 6             | 1488        | 0.453        | 5                | 803        | 5          | 682        | 0.952        |
| 0008643 | carbohydrate transport                                        | 8                     | 1487        | 7             | 1487        | 0.999        | 4                | 804        | 4          | 683        | 0.9          |
| 0015031 | protein transport                                             | 77                    | 1418        | 103           | 1391        | 0.054        | 34               | 774        | 43         | 644        | 0.095        |
| 0015837 | amine transport                                               | 6                     | 1489        | 6             | 1488        | 0.773        | 4                | 804        | 2          | 685        | 0.833        |
| 0015931 | nucleobase, nucleoside, nucleotide and nucleic acid transport | 6                     | 1489        | 7             | 1487        | 0.999        | 3                | 805        | 3          | 684        | 0.833        |
| 0016192 | vesicle-mediated transport                                    | 56                    | 1439        | 63            | 1431        | 0.572        | <b>18</b>        | <b>790</b> | <b>38</b>  | <b>649</b> | <b>0.001</b> |
| 0045045 | secretory pathway                                             | 42                    | 1453        | 53            | 1441        | 0.296        | <b>13</b>        | <b>795</b> | <b>29</b>  | <b>658</b> | <b>0.004</b> |
| 0046907 | intracellular transport                                       | 86                    | 1409        | 112           | 1382        | 0.065        | 40               | 768        | 46         | 641        | 0.183        |
| 0051049 | regulation of transport                                       | 7                     | 1488        | 11            | 1483        | 0.477        | 1                | 807        | 6          | 681        | 0.083        |
| 0008283 | cell proliferation                                            | 42                    | 1453        | 29            | 1465        | 0.15         | 23               | 785        | 19         | 668        | 0.95         |
| 0007049 | cell cycle                                                    | 64                    | 1431        | 64            | 1430        | 0.931        | 34               | 774        | 30         | 657        | 0.982        |
| 0017145 | stem cell division                                            | 7                     | 1488        | 5             | 1489        | 0.773        | 4                | 804        | 3          | 684        | 0.829        |
| 0016043 | cell organization and biogenesis                              | <b>121</b>            | <b>1374</b> | <b>154</b>    | <b>1340</b> | <b>0.042</b> | 62               | 746        | 59         | 628        | 0.582        |
| 0000902 | cellular morphogenesis                                        | 37                    | 1458        | 43            | 1451        | 0.569        | 17               | 791        | 20         | 667        | 0.404        |
| 0006996 | organelle organization and biogenesis                         | 105                   | 1390        | 133           | 1361        | 0.067        | 54               | 754        | 51         | 636        | 0.648        |
| 0007010 | cytoskeleton organization and biogenesis                      | 75                    | 1420        | 95            | 1399        | 0.132        | 36               | 772        | 39         | 648        | 0.337        |
| 0006997 | nuclear organization and biogenesis                           | 4                     | 1491        | 6             | 1488        | 0.751        | 1                | 807        | 3          | 684        | 0.506        |
| 0007028 | cytoplasm organization and biogenesis                         | 10                    | 1485        | 9             | 1485        | 0.999        | 3                | 805        | 7          | 680        | 0.225        |
| 0016044 | membrane organization and biogenesis                          | 3                     | 1492        | 6             | 1488        | 0.504        | 2                | 806        | 1          | 686        | 0.888        |
| 0051128 | regulation of cell organization and biogenesis                | 6                     | 1489        | 5             | 1489        | 0.999        | 4                | 804        | 2          | 685        | 0.833        |
| 0016049 | cell growth                                                   | 5                     | 1490        | 4             | 1490        | 0.999        | 4                | 804        | 1          | 686        | 0.473        |
| 0050896 | response to stimulus                                          | 91                    | 1404        | 90            | 1404        | 0.996        | 55               | 753        | 36         | 651        | 0.248        |
| 0006950 | response to stress                                            | 26                    | 1469        | 33            | 1461        | 0.429        | 14               | 794        | 12         | 675        | 0.859        |
| 0009408 | response to heat                                              | 5                     | 1490        | 5             | 1489        | 0.752        | 3                | 805        | 2          | 685        | 0.856        |
| 0006979 | response to oxidative stress                                  | 0                     | 1495        | 2             | 1492        | 0.479        | 0                | 808        | 0          | 687        | -            |
| 0051179 | localization                                                  | 208                   | 1287        | 221           | 1273        | 0.526        | <b>93</b>        | <b>715</b> | <b>115</b> | <b>572</b> | <b>0.005</b> |
| 0006403 | RNA localization                                              | 15                    | 1480        | 17            | 1477        | 0.857        | 7                | 801        | 8          | 679        | 0.752        |
| 0008104 | protein localization                                          | <b>82</b>             | <b>1413</b> | <b>113</b>    | <b>1381</b> | <b>0.026</b> | <b>35</b>        | <b>773</b> | <b>47</b>  | <b>640</b> | <b>0.044</b> |
| 0051234 | establishment of localization                                 | 196                   | 1299        | 207           | 1287        | 0.587        | <b>86</b>        | <b>722</b> | <b>110</b> | <b>577</b> | <b>0.003</b> |
| 0051235 | maintenance of localization                                   | 3                     | 1492        | 1             | 1493        | 0.617        | 2                | 806        | 1          | 686        | 0.888        |
| 0050789 | regulation of biological process                              | 196                   | 1299        | 207           | 1287        | 0.587        | 105              | 703        | 91         | 596        | 0.947        |
| 0050790 | regulation of enzyme activity                                 | 3                     | 1492        | 11            | 1483        | 0.061        | 2                | 806        | 1          | 686        | 0.888        |
| 0040029 | regulation of gene expression, epigenetic                     | 13                    | 1482        | 7             | 1487        | 0.263        | 8                | 800        | 5          | 682        | 0.791        |
| 0006306 | DNA methylation                                               | 6                     | 1489        | 1             | 1493        | 0.13         | 4                | 804        | 2          | 685        | 0.833        |
| 0045814 | negative regulation of gene expression, epigenetic            | 4                     | 1491        | 3             | 1491        | 0.999        | 2                | 806        | 2          | 685        | 0.734        |
| 0006342 | chromatin silencing                                           | 4                     | 1491        | 3             | 1491        | 0.999        | 2                | 806        | 2          | 685        | 0.734        |
| 0003674 | molecular_function                                            | 859                   | 636         | 873           | 621         | 0.615        | 466              | 342        | 393        | 294        | 0.897        |
| 0016209 | antioxidant activity                                          | 7                     | 1488        | 2             | 1492        | 0.182        | <b>7</b>         | <b>801</b> | <b>0</b>   | <b>687</b> | <b>0.039</b> |
| 0005488 | binding                                                       | 510                   | 985         | 497           | 997         | 0.652        | 275              | 533        | 235        | 452        | 0.988        |
| 0005509 | calcium ion binding                                           | 37                    | 1458        | 24            | 1470        | 0.121        | 17               | 791        | 20         | 667        | 0.404        |
| 0030246 | carbohydrate binding                                          | 9                     | 1486        | 6             | 1488        | 0.606        | 2                | 806        | 7          | 680        | 0.113        |
| 0008289 | lipid binding                                                 | 11                    | 1484        | 15            | 1479        | 0.553        | 8                | 800        | 3          | 684        | 0.345        |
| 0003676 | nucleic acid binding                                          | 200                   | 1295        | 189           | 1305        | 0.592        | <b>124</b>       | <b>684</b> | <b>76</b>  | <b>611</b> | <b>0.019</b> |
| 0003677 | DNA binding                                                   | 100                   | 1395        | 94            | 1400        | 0.714        | 57               | 751        | 43         | 644        | 0.61         |
| 0003682 | chromatin binding                                             | 7                     | 1488        | 16            | 1478        | 0.094        | 5                | 803        | 2          | 685        | 0.586        |
| 0003700 | transcription factor activity                                 | 41                    | 1454        | 45            | 1449        | 0.74         | 19               | 789        | 22         | 665        | 0.398        |
| 0003723 | RNA binding                                                   | 61                    | 1434        | 58            | 1436        | 0.855        | <b>43</b>        | <b>765</b> | <b>18</b>  | <b>669</b> | <b>0.012</b> |
| 0008135 | translation factor activity, nucleic acid binding             | 13                    | 1482        | 22            | 1472        | 0.173        | 9                | 799        | 4          | 683        | 0.41         |
| 0000166 | nucleotide binding                                            | 120                   | 1375        | 135           | 1359        | 0.356        | 70               | 738        | 50         | 637        | 0.375        |
| 0005515 | protein binding                                               | 186                   | 1309        | 193           | 1301        | 0.736        | 92               | 716        | 94         | 593        | 0.207        |
| 0008134 | transcription factor binding                                  | 21                    | 1474        | 10            | 1484        | 0.071        | 14               | 794        | 7          | 680        | 0.343        |
| 0008092 | cytoskeletal protein binding                                  | 39                    | 1456        | 49            | 1445        | 0.329        | 17               | 791        | 22         | 665        | 0.244        |
| 0003779 | actin binding                                                 | 22                    | 1473        | 31            | 1463        | 0.266        | 11               | 797        | 11         | 676        | 0.866        |
| 0003824 | catalytic activity                                            | 421                   | 1074        | 418           | 1076        | 0.944        | <b>251</b>       | <b>557</b> | <b>170</b> | <b>517</b> | <b>0.008</b> |
| 0016787 | hydrolase activity                                            | 185                   | 1310        | 187           | 1307        | 0.95         | 99               | 709        | 86         | 601        | 0.939        |
| 0003924 | GTPase activity                                               | 19                    | 1476        | 21            | 1473        | 0.872        | 10               | 798        | 9          | 678        | 0.915        |
| 0004518 | nuclease activity                                             | 5                     | 1490        | 10            | 1484        | 0.3          | 1                | 807        | 4          | 683        | 0.28         |



## PC2

| GO#     | GO term                                    | Representational bias |             |               |             |              | Directional bias |            |           |            |              |
|---------|--------------------------------------------|-----------------------|-------------|---------------|-------------|--------------|------------------|------------|-----------|------------|--------------|
|         |                                            | regulated             |             | not regulated |             | $\rho$       | up-reg.          |            | down-reg. |            | $\rho$       |
|         |                                            | term                  | n.term      | term          | n.term      |              | term             | n.term     | term      | n.term     |              |
| 0008233 | peptidase activity                         | 62                    | 1433        | 56            | 1438        | 0.641        | 37               | 771        | 25        | 662        | 0.436        |
| 0004721 | phosphoprotein phosphatase activity        | 16                    | 1479        | 14            | 1480        | 0.856        | 8                | 800        | 8         | 679        | 0.941        |
| 0016740 | transferase activity                       | 127                   | 1368        | 114           | 1380        | 0.423        | <b>82</b>        | <b>726</b> | <b>45</b> | <b>642</b> | <b>0.017</b> |
| 0016301 | kinase activity                            | 66                    | 1429        | 69            | 1425        | 0.857        | 37               | 771        | 29        | 658        | 0.834        |
| 0004672 | protein kinase activity                    | 51                    | 1444        | 44            | 1450        | 0.534        | 30               | 778        | 21        | 666        | 0.58         |
| 0030234 | enzyme regulator activity                  | 47                    | 1448        | 58            | 1436        | 0.319        | 22               | 786        | 25        | 662        | 0.388        |
| 0003774 | motor activity                             | <b>7</b>              | <b>1488</b> | <b>21</b>     | <b>1473</b> | <b>0.014</b> | 2                | 806        | 5         | 682        | 0.329        |
| 0004871 | signal transducer activity                 | 137                   | 1358        | 119           | 1375        | 0.269        | <b>62</b>        | <b>746</b> | <b>75</b> | <b>612</b> | <b>0.038</b> |
| 0004872 | receptor activity                          | 55                    | 1440        | 54            | 1440        | 0.997        | 27               | 781        | 28        | 659        | 0.539        |
| 0004879 | ligand-dependent nuclear receptor activity | 4                     | 1491        | 5             | 1489        | 0.999        | 3                | 805        | 1         | 686        | 0.734        |
| 0004888 | transmembrane receptor activity            | 39                    | 1456        | 35            | 1459        | 0.726        | 16               | 792        | 23        | 664        | 0.136        |
| 0004930 | G-protein coupled receptor activity        | 14                    | 1481        | 16            | 1478        | 0.853        | 6                | 802        | 8         | 679        | 0.566        |
| 0005057 | receptor signaling protein activity        | 43                    | 1452        | 37            | 1457        | 0.573        | 26               | 782        | 17        | 670        | 0.483        |
| 0005102 | receptor binding                           | 40                    | 1455        | 29            | 1465        | 0.224        | <b>14</b>        | <b>794</b> | <b>26</b> | <b>661</b> | <b>0.022</b> |
| 0005198 | structural molecule activity               | 81                    | 1414        | 81            | 1413        | 0.939        | 35               | 773        | 46        | 641        | 0.058        |
| 0030528 | transcription regulator activity           | 102                   | 1393        | 97            | 1397        | 0.773        | 58               | 750        | 44        | 643        | 0.625        |
| 0045182 | translation regulator activity             | 13                    | 1482        | 22            | 1472        | 0.173        | 9                | 799        | 4         | 683        | 0.41         |
| 0005215 | transporter activity                       | 132                   | 1363        | 121           | 1373        | 0.515        | 64               | 744        | 68        | 619        | 0.211        |
| 0005489 | electron transporter activity              | 17                    | 1478        | 12            | 1482        | 0.457        | 9                | 799        | 8         | 679        | 0.879        |
| 0005216 | ion channel activity                       | 29                    | 1466        | 23            | 1471        | 0.486        | 13               | 795        | 16        | 671        | 0.413        |
| 0005244 | voltage-gated ion channel activity         | 16                    | 1479        | 10            | 1484        | 0.326        | 6                | 802        | 10        | 677        | 0.279        |
| 0005575 | cellular_component                         | 603                   | 892         | 620           | 874         | 0.542        | 319              | 489        | 284       | 403        | 0.498        |
| 0005623 | cell                                       | 541                   | 954         | 571           | 923         | 0.266        | 284              | 524        | 257       | 430        | 0.394        |
| 0005622 | intracellular                              | 409                   | 1086        | 448           | 1046        | 0.121        | 230              | 578        | 179       | 508        | 0.325        |
| 0005737 | cytoplasm                                  | 212                   | 1283        | 246           | 1248        | 0.092        | 125              | 683        | 87        | 600        | 0.14         |
| 0016023 | cytoplasmic vesicle                        | 15                    | 1480        | 26            | 1468        | 0.115        | <b>3</b>         | <b>805</b> | <b>12</b> | <b>675</b> | <b>0.016</b> |
| 0005829 | cytosol                                    | 37                    | 1458        | 42            | 1452        | 0.646        | 25               | 783        | 12        | 675        | 0.133        |
| 0005783 | endoplasmic reticulum                      | 23                    | 1472        | 34            | 1460        | 0.18         | 16               | 792        | 7         | 680        | 0.196        |
| 0005794 | Golgi apparatus                            | 13                    | 1482        | 12            | 1482        | 0.999        | 5                | 803        | 8         | 679        | 0.394        |
| 0005815 | microtubule organizing center              | 4                     | 1491        | 5             | 1489        | 0.999        | 2                | 806        | 2         | 685        | 0.734        |
| 0005739 | mitochondrion                              | 47                    | 1448        | 58            | 1436        | 0.319        | 31               | 777        | 16        | 671        | 0.129        |
| 0005840 | ribosome                                   | <b>20</b>             | <b>1475</b> | <b>4</b>      | <b>1490</b> | <b>0.002</b> | 13               | 795        | 7         | 680        | 0.445        |
| 0005773 | vacuole                                    | 6                     | 1489        | 8             | 1486        | 0.788        | 2                | 806        | 4         | 683        | 0.542        |
| 0005764 | lysosome                                   | 2                     | 1493        | 3             | 1491        | 0.999        | 1                | 807        | 1         | 686        | 0.552        |
| 0005856 | cytoskeleton                               | 36                    | 1459        | 49            | 1445        | 0.186        | 15               | 793        | 21        | 666        | 0.18         |
| 0005694 | chromosome                                 | 25                    | 1470        | 15            | 1479        | 0.153        | 15               | 793        | 10        | 677        | 0.689        |
| 0000228 | nuclear chromosome                         | 3                     | 1492        | 2             | 1492        | 0.999        | 2                | 806        | 1         | 686        | 0.888        |
| 0005634 | nucleus                                    | 178                   | 1317        | 194           | 1300        | 0.402        | 106              | 702        | 72        | 615        | 0.136        |
| 0005635 | nuclear membrane                           | 8                     | 1487        | 9             | 1485        | 0.999        | 2                | 806        | 6         | 681        | 0.195        |
| 0005730 | nucleolus                                  | 4                     | 1491        | 7             | 1487        | 0.545        | 3                | 805        | 1         | 686        | 0.734        |
| 0005654 | nucleoplasm                                | 41                    | 1454        | 31            | 1463        | 0.284        | 24               | 784        | 17        | 670        | 0.67         |
| 0005777 | peroxisome                                 | 7                     | 1488        | 2             | 1492        | 0.182        | 5                | 803        | 2         | 685        | 0.586        |
| 0005886 | plasma membrane                            | 82                    | 1413        | 74            | 1420        | 0.568        | 36               | 772        | 46        | 641        | 0.075        |
| 0005576 | extracellular region                       | 44                    | 1451        | 32            | 1462        | 0.202        | <b>16</b>        | <b>792</b> | <b>28</b> | <b>659</b> | <b>0.025</b> |
| 0005578 | extracellular matrix (sensu Metazoa)       | 21                    | 1474        | 14            | 1480        | 0.309        | <b>4</b>         | <b>804</b> | <b>17</b> | <b>670</b> | <b>0.003</b> |

| GO#     | GO term                                                                           | Representational bias |             |               |             |              | Directional bias |        |           |        |        |
|---------|-----------------------------------------------------------------------------------|-----------------------|-------------|---------------|-------------|--------------|------------------|--------|-----------|--------|--------|
|         |                                                                                   | regulated             |             | not regulated |             | $\rho$       | up-reg.          |        | down-reg. |        | $\rho$ |
|         |                                                                                   | term                  | n.term      | term          | n.term      |              | term             | n.term | term      | n.term |        |
| 0008150 | biological_process                                                                | 805                   | 579         | 949           | 656         | 0.62         | 374              | 281    | 431       | 298    | 0.479  |
| 0007610 | behavior                                                                          | <b>89</b>             | <b>1295</b> | <b>73</b>     | <b>1532</b> | <b>0.029</b> | 47               | 608    | 42        | 687    | 0.336  |
| 0030534 | adult behavior                                                                    | 10                    | 1374        | 14            | 1591        | 0.801        | 3                | 652    | 7         | 722    | 0.433  |
| 0030537 | larval behavior                                                                   | 4                     | 1380        | 5             | 1600        | 0.824        | 1                | 654    | 3         | 726    | 0.693  |
| 0007611 | learning and/or memory                                                            | 9                     | 1375        | 15            | 1590        | 0.507        | 5                | 650    | 4         | 725    | 0.872  |
| 0007612 | learning                                                                          | 5                     | 1379        | 10            | 1595        | 0.453        | 3                | 652    | 2         | 727    | 0.905  |
| 0007613 | memory                                                                            | 5                     | 1379        | 6             | 1599        | 0.805        | 2                | 653    | 3         | 726    | 0.905  |
| 0007626 | locomotory behavior                                                               | 68                    | 1316        | 55            | 1550        | 0.051        | 33               | 622    | 35        | 694    | 0.937  |
| 0007635 | chemosensory behavior                                                             | 7                     | 1377        | 11            | 1594        | 0.692        | 5                | 650    | 2         | 727    | 0.368  |
| 0007622 | rhythmic behavior                                                                 | 8                     | 1376        | 7             | 1598        | 0.773        | 3                | 652    | 5         | 724    | 0.839  |
| 0048512 | circadian behavior                                                                | 8                     | 1376        | 6             | 1599        | 0.585        | 3                | 652    | 5         | 724    | 0.839  |
| 0009987 | cellular process                                                                  | 749                   | 635         | 879           | 726         | 0.751        | 344              | 311    | 405       | 324    | 0.281  |
| 0007154 | cell communication                                                                | 245                   | 1139        | 244           | 1361        | 0.073        | 114              | 541    | 131       | 598    | 0.838  |
| 0007155 | cell adhesion                                                                     | 49                    | 1335        | 41            | 1564        | 0.143        | 22               | 633    | 27        | 702    | 0.841  |
| 0008037 | cell recognition                                                                  | 1                     | 1383        | 1             | 1604        | 0.546        | 0                | 655    | 1         | 728    | 0.957  |
| 0008038 | neuronal cell recognition                                                         | 1                     | 1383        | 1             | 1604        | 0.546        | 0                | 655    | 1         | 728    | 0.957  |
| 0016337 | cell-cell adhesion                                                                | 21                    | 1363        | 18            | 1587        | 0.43         | 9                | 646    | 12        | 717    | 0.847  |
| 0016339 | calcium-dependent cell-cell adhesion                                              | 4                     | 1380        | 3             | 1602        | 0.844        | 3                | 652    | 1         | 728    | 0.543  |
| 0007156 | homophilic cell adhesion                                                          | 6                     | 1378        | 3             | 1602        | 0.372        | 3                | 652    | 3         | 726    | 0.781  |
| 0007160 | cell-matrix adhesion                                                              | 5                     | 1379        | 4             | 1601        | 0.824        | 3                | 652    | 2         | 727    | 0.905  |
| 0007267 | cell-cell signaling                                                               | <b>92</b>             | <b>1292</b> | <b>64</b>     | <b>1541</b> | <b>0.001</b> | 45               | 610    | 47        | 682    | 0.836  |
| 0019226 | transmission of nerve impulse                                                     | <b>80</b>             | <b>1304</b> | <b>58</b>     | <b>1547</b> | <b>0.006</b> | 39               | 616    | 41        | 688    | 0.883  |
| 0007268 | synaptic transmission                                                             | 56                    | 1328        | 45            | 1560        | 0.076        | 25               | 630    | 31        | 698    | 0.784  |
| 0007270 | nerve-nerve synaptic transmission                                                 | 11                    | 1373        | 5             | 1600        | 0.12         | 6                | 649    | 5         | 724    | 0.858  |
| 0001505 | regulation of neurotransmitter levels                                             | 27                    | 1357        | 33            | 1572        | 0.941        | 10               | 645    | 17        | 712    | 0.375  |
| 0042133 | neurotransmitter metabolism                                                       | 3                     | 1381        | 5             | 1600        | 0.885        | 3                | 652    | 0         | 729    | 0.211  |
| 0007269 | neurotransmitter secretion                                                        | 25                    | 1359        | 28            | 1577        | 0.991        | 8                | 647    | 17        | 712    | 0.178  |
| 0007165 | signal transduction                                                               | 185                   | 1199        | 194           | 1411        | 0.321        | 81               | 574    | 104       | 625    | 0.338  |
| 0007166 | cell surface receptor linked signal transduction                                  | 69                    | 1315        | 88            | 1517        | 0.599        | 37               | 618    | 32        | 697    | 0.342  |
| 0007167 | enzyme linked receptor protein signaling pathway                                  | 18                    | 1366        | 28            | 1577        | 0.404        | 12               | 643    | 6         | 723    | 0.157  |
| 0007178 | transmembrane receptor protein serine/threonine kinase signaling pathway          | 8                     | 1376        | 8             | 1597        | 0.963        | 4                | 651    | 4         | 725    | 0.839  |
| 0007179 | transforming growth factor beta receptor signaling pathway                        | 5                     | 1379        | 4             | 1601        | 0.824        | 3                | 652    | 2         | 727    | 0.905  |
| 0007169 | transmembrane receptor protein tyrosine kinase signaling pathway                  | 11                    | 1373        | 21            | 1584        | 0.237        | 8                | 647    | 3         | 726    | 0.164  |
| 0007173 | epidermal growth factor receptor signaling pathway                                | 2                     | 1382        | 6             | 1599        | 0.393        | 1                | 654    | 1         | 728    | 0.527  |
| 0008286 | insulin receptor signaling pathway                                                | 1                     | 1383        | 3             | 1602        | 0.724        | 1                | 654    | 0         | 729    | 0.957  |
| 0008293 | torso signaling pathway                                                           | <b>0</b>              | <b>1384</b> | <b>7</b>      | <b>1598</b> | <b>0.037</b> | 0                | 655    | 0         | 729    | -      |
| 0007186 | G-protein coupled receptor protein signaling pathway                              | 36                    | 1348        | 35            | 1570        | 0.527        | 20               | 635    | 16        | 713    | 0.405  |
| 0007200 | G-protein signaling, coupled to IP3 second messenger (phospholipase C activating) | 4                     | 1380        | 1             | 1604        | 0.288        | 1                | 654    | 3         | 726    | 0.693  |
| 0007219 | Notch signaling pathway                                                           | 5                     | 1379        | 8             | 1597        | 0.772        | 3                | 652    | 2         | 727    | 0.905  |
| 0007224 | smoothened signaling pathway                                                      | 0                     | 1384        | 6             | 1599        | 0.062        | 0                | 655    | 0         | 729    | -      |
| 0008063 | Toll signaling pathway                                                            | 1                     | 1383        | 3             | 1602        | 0.724        | 0                | 655    | 1         | 728    | 0.957  |
| 0016055 | Wnt receptor signaling pathway                                                    | 6                     | 1378        | 10            | 1595        | 0.648        | 1                | 654    | 5         | 724    | 0.272  |
| 0007242 | intracellular signaling cascade                                                   | 89                    | 1295        | 93            | 1512        | 0.517        | 36               | 619    | 53        | 676    | 0.217  |
| 0007263 | nitric oxide mediated signal transduction                                         | 3                     | 1381        | 1             | 1604        | 0.516        | 0                | 655    | 3         | 726    | 0.287  |
| 0007243 | protein kinase cascade                                                            | 22                    | 1362        | 19            | 1586        | 0.428        | 10               | 645    | 12        | 717    | 0.97   |
| 0007259 | JAK-STAT cascade                                                                  | 3                     | 1381        | 3             | 1602        | 0.82         | 2                | 653    | 1         | 728    | 0.926  |
| 0000165 | MAPKK cascade                                                                     | 18                    | 1366        | 15            | 1590        | 0.436        | 7                | 648    | 11        | 718    | 0.628  |
| 0019932 | second-messenger-mediated signaling                                               | 14                    | 1370        | 8             | 1597        | 0.155        | 4                | 651    | 10        | 719    | 0.253  |
| 0019722 | calcium-mediated signaling                                                        | 10                    | 1374        | 5             | 1600        | 0.185        | 3                | 652    | 7         | 722    | 0.433  |
| 0048015 | phosphoinositide-mediated signaling                                               | 4                     | 1380        | 1             | 1604        | 0.288        | 1                | 654    | 3         | 726    | 0.693  |
| 0007264 | small GTPase mediated signal transduction                                         | 20                    | 1364        | 24            | 1581        | 0.969        | 8                | 647    | 12        | 717    | 0.663  |
| 0007265 | Ras protein signal transduction                                                   | 3                     | 1381        | 7             | 1598        | 0.473        | 2                | 653    | 1         | 728    | 0.926  |
| 0009966 | regulation of signal transduction                                                 | 17                    | 1367        | 17            | 1588        | 0.793        | 6                | 649    | 11        | 718    | 0.45   |
| 0007275 | development                                                                       | 217                   | 1167        | 243           | 1362        | 0.722        | 106              | 549    | 111       | 618    | 0.678  |
| 0007568 | aging                                                                             | 3                     | 1381        | 8             | 1597        | 0.334        | 3                | 652    | 0         | 729    | 0.211  |
| 0030154 | cell differentiation                                                              | 48                    | 1336        | 71            | 1534        | 0.216        | 21               | 634    | 27        | 702    | 0.72   |
| 0048468 | cell development                                                                  | 29                    | 1355        | 46            | 1559        | 0.22         | 11               | 644    | 18        | 711    | 0.403  |
| 0000904 | cellular morphogenesis during differentiation                                     | 9                     | 1375        | 10            | 1595        | 0.891        | 3                | 652    | 6         | 723    | 0.611  |
| 0042461 | photoreceptor cell development                                                    | 8                     | 1376        | 10            | 1595        | 0.937        | 3                | 652    | 5         | 724    | 0.839  |
| 0042051 | eye photoreceptor development (sensu Endopterygota)                               | 8                     | 1376        | 9             | 1596        | 0.856        | 3                | 652    | 5         | 724    | 0.839  |
| 0045165 | cell fate commitment                                                              | 21                    | 1363        | 28            | 1577        | 0.731        | 10               | 645    | 11        | 718    | 0.847  |

## PC3

| GO#     | GO term                                                        | Representational bias |             |               |             |              | Directional bias |            |           |            |              |
|---------|----------------------------------------------------------------|-----------------------|-------------|---------------|-------------|--------------|------------------|------------|-----------|------------|--------------|
|         |                                                                | regulated             |             | not regulated |             | $\rho$       | up-reg.          |            | down-reg. |            | $\rho$       |
|         |                                                                | term                  | n.term      | term          | n.term      |              | term             | n.term     | term      | n.term     |              |
| 0001709 | cell fate determination                                        | 13                    | 1371        | 17            | 1588        | 0.886        | 7                | 648        | 6         | 723        | 0.846        |
| 0007400 | neuroblast cell fate determination                             | 6                     | 1378        | 2             | 1603        | 0.202        | 2                | 653        | 4         | 725        | 0.781        |
| 0001708 | cell fate specification                                        | 3                     | 1381        | 5             | 1600        | 0.885        | 2                | 653        | 1         | 728        | 0.926        |
| 0007349 | cellularization                                                | 7                     | 1377        | 4             | 1601        | 0.394        | 4                | 651        | 3         | 726        | 0.887        |
| 0040007 | growth                                                         | 16                    | 1368        | 20            | 1585        | 0.955        | 9                | 646        | 7         | 722        | 0.64         |
| 0002164 | larval development                                             | 6                     | 1378        | 11            | 1594        | 0.503        | 3                | 652        | 3         | 726        | 0.781        |
| 0002165 | larval or pupal development (sensu Insecta)                    | 54                    | 1330        | 75            | 1530        | 0.345        | 29               | 626        | 25        | 704        | 0.413        |
| 0007552 | metamorphosis                                                  | 52                    | 1332        | 69            | 1536        | 0.512        | 27               | 628        | 25        | 704        | 0.593        |
| 0009653 | morphogenesis                                                  | 160                   | 1224        | 159           | 1446        | 0.161        | 71               | 584        | 89        | 640        | 0.477        |
| 0002009 | morphogenesis of an epithelium                                 | 19                    | 1365        | 25            | 1580        | 0.79         | 7                | 648        | 12        | 717        | 0.49         |
| 0009887 | organogenesis                                                  | 142                   | 1242        | 140           | 1465        | 0.17         | 63               | 592        | 79        | 650        | 0.511        |
| 0001654 | eye morphogenesis                                              | 23                    | 1361        | 34            | 1571        | 0.438        | 7                | 648        | 16        | 713        | 0.154        |
| 0008406 | gonad development                                              | 5                     | 1379        | 6             | 1599        | 0.805        | 3                | 652        | 2         | 727        | 0.905        |
| 0007444 | imaginal disc development                                      | 41                    | 1343        | 52            | 1553        | 0.741        | 22               | 633        | 19        | 710        | 0.506        |
| 0007494 | midgut development                                             | 4                     | 1380        | 1             | 1604        | 0.288        | 2                | 653        | 2         | 727        | 0.693        |
| 0007517 | muscle development                                             | 20                    | 1364        | 14            | 1591        | 0.194        | 8                | 647        | 12        | 717        | 0.663        |
| 0007399 | neurogenesis                                                   | 84                    | 1300        | 78            | 1527        | 0.169        | 35               | 620        | 49        | 680        | 0.337        |
| 0007409 | axonogenesis                                                   | 26                    | 1358        | 17            | 1588        | 0.085        | 16               | 639        | 10        | 719        | 0.205        |
| 0007411 | axon guidance                                                  | 20                    | 1364        | 13            | 1592        | 0.138        | 13               | 642        | 7         | 722        | 0.171        |
| 0007417 | central nervous system development                             | 19                    | 1365        | 20            | 1585        | 0.886        | 10               | 645        | 9         | 720        | 0.814        |
| 0016358 | dendrite morphogenesis                                         | 9                     | 1375        | 5             | 1600        | 0.278        | <b>8</b>         | <b>647</b> | <b>1</b>  | <b>728</b> | <b>0.03</b>  |
| 0042063 | gliogenesis                                                    | 4                     | 1380        | 7             | 1598        | 0.719        | 2                | 653        | 2         | 727        | 0.693        |
| 0007422 | peripheral nervous system development                          | 20                    | 1364        | 20            | 1585        | 0.755        | 9                | 646        | 11        | 718        | 0.988        |
| 0050767 | regulation of neurogenesis                                     | <b>5</b>              | <b>1379</b> | <b>0</b>      | <b>1605</b> | <b>0.05</b>  | 5                | 650        | 0         | 729        | 0.056        |
| 0007424 | tracheal system development (sensu Insecta)                    | 15                    | 1369        | 22            | 1583        | 0.588        | 4                | 651        | 11        | 718        | 0.177        |
| 0048513 | organ development                                              | 145                   | 1239        | 141           | 1464        | 0.132        | 65               | 590        | 80        | 649        | 0.583        |
| 0007389 | pattern specification                                          | <b>25</b>             | <b>1359</b> | <b>51</b>     | <b>1554</b> | <b>0.024</b> | 12               | 643        | 13        | 716        | 0.893        |
| 0048066 | pigmentation                                                   | 5                     | 1379        | 6             | 1599        | 0.805        | 4                | 651        | 1         | 728        | 0.309        |
| 0009791 | post-embryonic development                                     | 6                     | 1378        | 11            | 1594        | 0.503        | 3                | 652        | 3         | 726        | 0.781        |
| 0009790 | embryonic development                                          | 39                    | 1345        | 61            | 1544        | 0.165        | 19               | 636        | 20        | 709        | 0.989        |
| 0007530 | sex determination                                              | 5                     | 1379        | 5             | 1600        | 0.934        | 2                | 653        | 3         | 726        | 0.905        |
| 0007548 | sex differentiation                                            | 9                     | 1375        | 10            | 1595        | 0.891        | 5                | 650        | 4         | 725        | 0.872        |
| 0019827 | stem cell maintenance                                          | 2                     | 1382        | 6             | 1599        | 0.393        | 1                | 654        | 1         | 728        | 0.527        |
| 0000003 | reproduction                                                   | 56                    | 1328        | 88            | 1517        | 0.081        | 26               | 629        | 30        | 699        | 0.999        |
| 0050793 | regulation of development                                      | 20                    | 1364        | 23            | 1582        | 0.899        | <b>15</b>        | <b>640</b> | <b>5</b>  | <b>724</b> | <b>0.023</b> |
| 0007582 | physiological process                                          | 734                   | 650         | 871           | 734         | 0.524        | 338              | 317        | 396       | 333        | 0.338        |
| 0008152 | metabolism                                                     | 517                   | 867         | 649           | 956         | 0.092        | 244              | 411        | 273       | 456        | 0.984        |
| 0009056 | catabolism                                                     | 94                    | 1290        | 115           | 1490        | 0.744        | 46               | 609        | 48        | 681        | 0.828        |
| 0006091 | energy pathways                                                | 43                    | 1341        | 65            | 1540        | 0.201        | 17               | 638        | 26        | 703        | 0.376        |
| 0006118 | electron transport                                             | 19                    | 1365        | 36            | 1569        | 0.103        | 9                | 646        | 10        | 719        | 0.82         |
| 0006139 | nucleobase, nucleoside, nucleotide and nucleic acid metabolism | 90                    | 1194        | 242           | 1363        | 0.32         | 89               | 566        | 101       | 628        | 0.948        |
| 0006259 | DNA metabolism                                                 | 32                    | 1352        | 47            | 1558        | 0.351        | <b>22</b>        | <b>633</b> | <b>10</b> | <b>719</b> | <b>0.023</b> |
| 0006350 | transcription                                                  | 103                   | 1281        | 124           | 1481        | 0.824        | 54               | 601        | 49        | 680        | 0.33         |
| 0043170 | macromolecule metabolism                                       | 285                   | 1099        | 343           | 1262        | 0.634        | 128              | 527        | 157       | 572        | 0.396        |
| 0019538 | protein metabolism                                             | 241                   | 1143        | 286           | 1319        | 0.809        | 108              | 547        | 133       | 596        | 0.43         |
| 0006412 | protein biosynthesis                                           | 47                    | 1337        | 63            | 1542        | 0.504        | 22               | 633        | 25        | 704        | 0.939        |
| 0006464 | protein modification                                           | 114                   | 1270        | 142           | 1463        | 0.597        | 54               | 601        | 60        | 669        | 0.929        |
| 0006457 | protein folding                                                | 20                    | 1364        | 23            | 1582        | 0.899        | 5                | 650        | 15        | 714        | 0.074        |
| 0005975 | carbohydrate metabolism                                        | 47                    | 1337        | 60            | 1545        | 0.686        | 20               | 635        | 27        | 702        | 0.604        |
| 0006519 | amino acid and derivative metabolism                           | 37                    | 1347        | 33            | 1572        | 0.321        | 19               | 636        | 18        | 711        | 0.741        |
| 0006629 | lipid metabolism                                               | 39                    | 1345        | 50            | 1555        | 0.712        | 20               | 635        | 19        | 710        | 0.734        |
| 0009308 | amine metabolism                                               | 40                    | 1344        | 41            | 1564        | 0.652        | 20               | 635        | 20        | 709        | 0.855        |
| 0042440 | pigment metabolism                                             | 6                     | 1378        | 6             | 1599        | 0.974        | 5                | 650        | 1         | 728        | 0.174        |
| 0042445 | hormone metabolism                                             | 3                     | 1381        | 4             | 1601        | 0.844        | 1                | 654        | 2         | 727        | 0.926        |
| 0009058 | biosynthesis                                                   | 82                    | 1302        | 122           | 1483        | 0.082        | 38               | 617        | 44        | 685        | 0.944        |
| 0019748 | secondary metabolism                                           | 8                     | 1376        | 6             | 1599        | 0.585        | 6                | 649        | 2         | 727        | 0.224        |
| 0019222 | regulation of metabolism                                       | 106                   | 1278        | 132           | 1473        | 0.616        | 56               | 599        | 50        | 679        | 0.28         |
| 0016265 | death                                                          | 38                    | 1346        | 48            | 1557        | 0.772        | 16               | 639        | 22        | 707        | 0.625        |
| 0008219 | cell death                                                     | 34                    | 1350        | 40            | 1565        | 0.956        | 13               | 642        | 21        | 708        | 0.368        |
| 0016271 | tissue death                                                   | 12                    | 1372        | 15            | 1590        | 0.999        | 4                | 651        | 8         | 721        | 0.493        |
| 0042592 | homeostasis                                                    | 12                    | 1372        | 17            | 1588        | 0.728        | 4                | 651        | 8         | 721        | 0.493        |
| 0019725 | cell homeostasis                                               | 10                    | 1374        | 16            | 1589        | 0.543        | 3                | 652        | 7         | 722        | 0.433        |
| 0050801 | ion homeostasis                                                | 6                     | 1378        | 8             | 1597        | 0.992        | 2                | 653        | 4         | 725        | 0.781        |
| 0043062 | extracellular structure organization and biogenesis            | 8                     | 1376        | 11            | 1594        | 0.891        | 4                | 651        | 4         | 725        | 0.839        |
| 0046903 | secretion                                                      | 51                    | 1333        | 50            | 1555        | 0.448        | 21               | 634        | 30        | 699        | 0.451        |
| 0048511 | rhythmic process                                               | 9                     | 1375        | 8             | 1597        | 0.759        | 4                | 651        | 5         | 724        | 0.872        |

## PC3

| GO#     | GO term                                                       | Representational bias |             |               |             |              | Directional bias |            |           |            |              |
|---------|---------------------------------------------------------------|-----------------------|-------------|---------------|-------------|--------------|------------------|------------|-----------|------------|--------------|
|         |                                                               | regulated             |             | not regulated |             | $\rho$       | up-reg.          |            | down-reg. |            | $\rho$       |
|         |                                                               | term                  | n.term      | term          | n.term      |              | term             | n.term     | term      | n.term     |              |
| 0050791 | regulation of physiological process                           | 162                   | 1222        | 185           | 1420        | 0.924        | 82               | 573        | 80        | 649        | 0.419        |
| 0050874 | organismal physiological process                              | <b>126</b>            | <b>1258</b> | <b>106</b>    | <b>1499</b> | <b>0.013</b> | 60               | 595        | 66        | 663        | 0.98         |
| 0050875 | cellular physiological process                                | 693                   | 691         | 826           | 779         | 0.47         | 316              | 339        | 377       | 352        | 0.217        |
| 0006810 | transport                                                     | 182                   | 1202        | 216           | 1389        | 0.847        | 83               | 572        | 99        | 630        | 0.675        |
| 0006811 | ion transport                                                 | 55                    | 1329        | 65            | 1540        | 0.99         | 25               | 630        | 30        | 699        | 0.884        |
| 0006818 | hydrogen transport                                            | 6                     | 1378        | 12            | 1593        | 0.384        | 3                | 652        | 3         | 726        | 0.781        |
| 0006836 | neurotransmitter transport                                    | 2                     | 1382        | 3             | 1602        | 0.868        | 1                | 654        | 1         | 728        | 0.527        |
| 0006858 | extracellular transport                                       | 6                     | 1378        | 9             | 1596        | 0.817        | 3                | 652        | 3         | 726        | 0.781        |
| 0006869 | lipid transport                                               | 7                     | 1377        | 9             | 1596        | 0.963        | 4                | 651        | 3         | 726        | 0.887        |
| 0008643 | carbohydrate transport                                        | 7                     | 1377        | 8             | 1597        | 0.817        | 5                | 650        | 2         | 727        | 0.368        |
| 0015031 | protein transport                                             | 80                    | 1304        | 100           | 1505        | 0.661        | 34               | 621        | 46        | 683        | 0.438        |
| 0015837 | amine transport                                               | 7                     | 1377        | 5             | 1600        | 0.584        | 2                | 653        | 5         | 724        | 0.537        |
| 0015931 | nucleobase, nucleoside, nucleotide and nucleic acid transport | <b>2</b>              | <b>1382</b> | <b>11</b>     | <b>1594</b> | <b>0.05</b>  | 0                | 655        | 2         | 727        | 0.527        |
| 0016192 | vesicle-mediated transport                                    | 57                    | 1327        | 62            | 1543        | 0.793        | <b>19</b>        | <b>636</b> | <b>38</b> | <b>691</b> | <b>0.043</b> |
| 0045045 | secretory pathway                                             | 46                    | 1338        | 49            | 1556        | 0.752        | 18               | 637        | 28        | 701        | 0.326        |
| 0046907 | intracellular transport                                       | 85                    | 1299        | 113           | 1492        | 0.362        | 38               | 617        | 47        | 682        | 0.698        |
| 0051049 | regulation of transport                                       | 12                    | 1372        | 6             | 1599        | 0.133        | 5                | 650        | 7         | 722        | 0.917        |
| 0008283 | cell proliferation                                            | 38                    | 1346        | 33            | 1572        | 0.265        | 17               | 638        | 21        | 708        | 0.873        |
| 0007049 | cell cycle                                                    | 59                    | 1325        | 69            | 1536        | 0.966        | 26               | 629        | 33        | 696        | 0.705        |
| 0017145 | stem cell division                                            | 5                     | 1379        | 7             | 1598        | 0.974        | 1                | 654        | 4         | 725        | 0.437        |
| 0016043 | cell organization and biogenesis                              | 136                   | 1248        | 139           | 1466        | 0.3          | 70               | 585        | 66        | 663        | 0.353        |
| 0000902 | cellular morphogenesis                                        | 41                    | 1343        | 39            | 1566        | 0.432        | 16               | 639        | 25        | 704        | 0.356        |
| 0006996 | organelle organization and biogenesis                         | 118                   | 1266        | 120           | 1485        | 0.323        | 64               | 591        | 54        | 675        | 0.14         |
| 0007010 | cytoskeleton organization and biogenesis                      | 83                    | 1301        | 87            | 1518        | 0.549        | 42               | 613        | 41        | 688        | 0.615        |
| 0006997 | nuclear organization and biogenesis                           | 3                     | 1381        | 7             | 1598        | 0.473        | 1                | 654        | 2         | 727        | 0.926        |
| 0007028 | cytoplasm organization and biogenesis                         | 12                    | 1372        | 7             | 1598        | 0.212        | 3                | 652        | 9         | 720        | 0.206        |
| 0016044 | membrane organization and biogenesis                          | 5                     | 1379        | 4             | 1601        | 0.824        | 2                | 653        | 3         | 726        | 0.905        |
| 0051128 | regulation of cell organization and biogenesis                | 8                     | 1376        | 3             | 1602        | 0.145        | 5                | 650        | 3         | 726        | 0.612        |
| 0016049 | cell growth                                                   | 2                     | 1382        | 7             | 1598        | 0.264        | 2                | 653        | 0         | 729        | 0.433        |
| 0050896 | response to stimulus                                          | 84                    | 1300        | 97            | 1508        | 0.962        | 39               | 616        | 45        | 684        | 0.954        |
| 0006950 | response to stress                                            | 21                    | 1363        | 38            | 1567        | 0.125        | 8                | 647        | 13        | 716        | 0.526        |
| 0009408 | response to heat                                              | 3                     | 1381        | 7             | 1598        | 0.473        | 1                | 654        | 2         | 727        | 0.926        |
| 0006979 | response to oxidative stress                                  | 1                     | 1383        | 1             | 1604        | 0.546        | 1                | 654        | 0         | 729        | 0.957        |
| 0051179 | localization                                                  | 197                   | 1187        | 232           | 1373        | 0.905        | 91               | 564        | 106       | 623        | 0.789        |
| 0006403 | RNA localization                                              | 12                    | 1372        | 20            | 1585        | 0.409        | 6                | 649        | 6         | 723        | 0.917        |
| 0008104 | protein localization                                          | 88                    | 1296        | 107           | 1498        | 0.79         | 39               | 616        | 49        | 680        | 0.636        |
| 0051234 | establishment of localization                                 | 186                   | 1198        | 217           | 1388        | 0.991        | 85               | 570        | 101       | 628        | 0.69         |
| 0051235 | maintenance of localization                                   | 1                     | 1383        | 3             | 1602        | 0.724        | 0                | 655        | 1         | 728        | 0.957        |
| 0050789 | regulation of biological process                              | 186                   | 1198        | 217           | 1388        | 0.991        | 96               | 559        | 90        | 639        | 0.238        |
| 0050790 | regulation of enzyme activity                                 | 3                     | 1381        | 11            | 1594        | 0.109        | 3                | 652        | 0         | 729        | 0.211        |
| 0040029 | regulation of gene expression, epigenetic                     | 9                     | 1375        | 11            | 1594        | 0.914        | 7                | 648        | 2         | 727        | 0.133        |
| 0006306 | DNA methylation                                               | 3                     | 1381        | 4             | 1601        | 0.844        | 1                | 654        | 2         | 727        | 0.926        |
| 0045814 | negative regulation of gene expression, epigenetic            | 3                     | 1381        | 4             | 1601        | 0.844        | 3                | 652        | 0         | 729        | 0.211        |
| 0006342 | chromatin silencing                                           | 3                     | 1381        | 4             | 1601        | 0.844        | 3                | 652        | 0         | 729        | 0.211        |
| 0003674 | molecular_function                                            | 792                   | 592         | 940           | 665         | 0.482        | 379              | 276        | 413       | 316        | 0.689        |
| 0016209 | antioxidant activity                                          | 3                     | 1381        | 6             | 1599        | 0.655        | 2                | 653        | 1         | 728        | 0.926        |
| 0005488 | binding                                                       | 460                   | 924         | 547           | 1058        | 0.654        | 224              | 431        | 236       | 493        | 0.508        |
| 0005509 | calcium ion binding                                           | 32                    | 1352        | 29            | 1576        | 0.398        | 20               | 635        | 12        | 717        | 0.119        |
| 0030246 | carbohydrate binding                                          | 5                     | 1379        | 10            | 1595        | 0.453        | 1                | 654        | 4         | 725        | 0.437        |
| 0008289 | lipid binding                                                 | 14                    | 1370        | 12            | 1593        | 0.564        | 5                | 650        | 9         | 720        | 0.545        |
| 0003676 | nucleic acid binding                                          | 167                   | 1217        | 222           | 1383        | 0.169        | 81               | 574        | 86        | 643        | 0.809        |
| 0003677 | DNA binding                                                   | 86                    | 1298        | 108           | 1497        | 0.62         | 42               | 613        | 44        | 685        | 0.859        |
| 0003682 | chromatin binding                                             | <b>3</b>              | <b>1381</b> | <b>20</b>     | <b>1585</b> | <b>0.003</b> | 2                | 653        | 1         | 728        | 0.926        |
| 0003700 | transcription factor activity                                 | 41                    | 1343        | 45            | 1560        | 0.881        | 18               | 637        | 23        | 706        | 0.774        |
| 0003723 | RNA binding                                                   | <b>43</b>             | <b>1341</b> | <b>76</b>     | <b>1529</b> | <b>0.03</b>  | 21               | 634        | 22        | 707        | 0.963        |
| 0008135 | translation factor activity, nucleic acid binding             | 13                    | 1371        | 22            | 1583        | 0.356        | 3                | 652        | 10        | 719        | 0.139        |
| 0000166 | nucleotide binding                                            | 118                   | 1266        | 137           | 1468        | 0.955        | 51               | 604        | 67        | 662        | 0.402        |
| 0005515 | protein binding                                               | 182                   | 1202        | 197           | 1408        | 0.508        | 86               | 569        | 96        | 633        | 0.954        |
| 0008134 | transcription factor binding                                  | 11                    | 1373        | 20            | 1585        | 0.301        | 8                | 647        | 3         | 726        | 0.164        |
| 0008092 | cytoskeletal protein binding                                  | 45                    | 1339        | 43            | 1562        | 0.415        | 23               | 632        | 22        | 707        | 0.715        |
| 0003779 | actin binding                                                 | 27                    | 1357        | 26            | 1579        | 0.586        | 15               | 640        | 12        | 717        | 0.503        |
| 0003824 | catalytic activity                                            | 375                   | 1009        | 464           | 1141        | 0.289        | 183              | 472        | 192       | 537        | 0.543        |
| 0016787 | hydrolase activity                                            | 165                   | 1219        | 207           | 1398        | 0.453        | 80               | 575        | 85        | 644        | 0.815        |
| 0003924 | GTPase activity                                               | 22                    | 1362        | 18            | 1587        | 0.342        | 11               | 644        | 11        | 718        | 0.97         |
| 0004518 | nuclease activity                                             | 5                     | 1379        | 10            | 1595        | 0.453        | 4                | 651        | 1         | 728        | 0.309        |

## PC3

| GO#     | GO term                                    | Representational bias |             |               |             |              | Directional bias |            |           |            |              |
|---------|--------------------------------------------|-----------------------|-------------|---------------|-------------|--------------|------------------|------------|-----------|------------|--------------|
|         |                                            | regulated             |             | not regulated |             | $\rho$       | up-reg.          |            | down-reg. |            | $\rho$       |
|         |                                            | term                  | n.term      | term          | n.term      |              | term             | n.term     | term      | n.term     |              |
| 0008233 | peptidase activity                         | 52                    | 1332        | 66            | 1539        | 0.687        | 24               | 631        | 28        | 701        | 0.975        |
| 0004721 | phosphoprotein phosphatase activity        | 10                    | 1374        | 20            | 1585        | 0.212        | 5                | 650        | 5         | 724        | 0.882        |
| 0016740 | transferase activity                       | 111                   | 1273        | 130           | 1475        | 0.99         | 56               | 599        | 55        | 674        | 0.556        |
| 0016301 | kinase activity                            | 62                    | 1322        | 73            | 1532        | 0.999        | 26               | 629        | 36        | 693        | 0.459        |
| 0004672 | protein kinase activity                    | 43                    | 1341        | 52            | 1553        | 0.919        | 18               | 637        | 25        | 704        | 0.566        |
| 0030234 | enzyme regulator activity                  | 53                    | 1331        | 52            | 1553        | 0.439        | 19               | 636        | 34        | 695        | 0.117        |
| 0003774 | motor activity                             | 13                    | 1371        | 15            | 1590        | 0.859        | 3                | 652        | 10        | 719        | 0.139        |
| 0004871 | signal transducer activity                 | <b>136</b>            | <b>1248</b> | <b>120</b>    | <b>1485</b> | <b>0.026</b> | 61               | 594        | 75        | 654        | 0.604        |
| 0004872 | receptor activity                          | 58                    | 1326        | 51            | 1554        | 0.169        | 31               | 624        | 27        | 702        | 0.412        |
| 0004879 | ligand-dependent nuclear receptor activity | 4                     | 1380        | 5             | 1600        | 0.824        | 2                | 653        | 2         | 727        | 0.693        |
| 0004888 | transmembrane receptor activity            | 35                    | 1349        | 39            | 1566        | 0.956        | 22               | 633        | 13        | 716        | 0.091        |
| 0004930 | G-protein coupled receptor activity        | 15                    | 1369        | 15            | 1590        | 0.823        | 11               | 644        | 4         | 725        | 0.077        |
| 0005057 | receptor signaling protein activity        | 40                    | 1344        | 40            | 1565        | 0.576        | 13               | 642        | 27        | 702        | 0.081        |
| 0005102 | receptor binding                           | 35                    | 1349        | 34            | 1571        | 0.533        | 16               | 639        | 19        | 710        | 0.982        |
| 0005198 | structural molecule activity               | 86                    | 1298        | 76            | 1529        | 0.089        | 41               | 614        | 45        | 684        | 0.964        |
| 0030528 | transcription regulator activity           | 89                    | 1295        | 110           | 1495        | 0.697        | 46               | 609        | 43        | 686        | 0.458        |
| 0045182 | translation regulator activity             | 13                    | 1371        | 22            | 1583        | 0.356        | 3                | 652        | 10        | 719        | 0.139        |
| 0005215 | transporter activity                       | 110                   | 1274        | 143           | 1462        | 0.381        | 54               | 601        | 56        | 673        | 0.774        |
| 0005489 | electron transporter activity              | 9                     | 1375        | 20            | 1585        | 0.142        | 4                | 651        | 5         | 724        | 0.872        |
| 0005216 | ion channel activity                       | 29                    | 1355        | 23            | 1582        | 0.215        | 16               | 639        | 13        | 716        | 0.505        |
| 0005244 | voltage-gated ion channel activity         | 11                    | 1373        | 15            | 1590        | 0.831        | 7                | 648        | 4         | 725        | 0.433        |
| 0005575 | cellular_component                         | <b>536</b>            | <b>848</b>  | <b>687</b>    | <b>918</b>  | <b>0.026</b> | 265              | 390        | 271       | 458        | 0.231        |
| 0005623 | cell                                       | 493                   | 891         | 619           | 986         | 0.105        | 244              | 411        | 249       | 480        | 0.252        |
| 0005622 | intracellular                              | <b>368</b>            | <b>1016</b> | <b>489</b>    | <b>1116</b> | <b>0.022</b> | 183              | 472        | 185       | 544        | 0.31         |
| 0005737 | cytoplasm                                  | <b>192</b>            | <b>1192</b> | <b>266</b>    | <b>1339</b> | <b>0.046</b> | 98               | 557        | 94        | 635        | 0.302        |
| 0016023 | cytoplasmic vesicle                        | 20                    | 1364        | 21            | 1584        | 0.871        | 8                | 647        | 12        | 717        | 0.663        |
| 0005829 | cytosol                                    | 29                    | 1355        | 50            | 1555        | 0.105        | 9                | 646        | 20        | 709        | 0.112        |
| 0005783 | endoplasmic reticulum                      | 20                    | 1364        | 37            | 1568        | 0.114        | 9                | 646        | 11        | 718        | 0.988        |
| 0005794 | Golgi apparatus                            | 13                    | 1371        | 12            | 1593        | 0.71         | 7                | 648        | 6         | 723        | 0.846        |
| 0005815 | microtubule organizing center              | 2                     | 1382        | 7             | 1598        | 0.264        | 1                | 654        | 1         | 728        | 0.527        |
| 0005739 | mitochondrion                              | 46                    | 1338        | 59            | 1546        | 0.673        | 24               | 631        | 22        | 707        | 0.603        |
| 0005840 | ribosome                                   | 11                    | 1373        | 13            | 1592        | 0.874        | 6                | 649        | 5         | 724        | 0.858        |
| 0005773 | vacuole                                    | 4                     | 1380        | 10            | 1595        | 0.287        | 2                | 653        | 2         | 727        | 0.693        |
| 0005764 | lysosome                                   | 1                     | 1383        | 4             | 1601        | 0.464        | 1                | 654        | 0         | 729        | 0.957        |
| 0005856 | cytoskeleton                               | 44                    | 1340        | 41            | 1564        | 0.361        | 20               | 635        | 24        | 705        | 0.921        |
| 0005694 | chromosome                                 | <b>9</b>              | <b>1375</b> | <b>31</b>     | <b>1574</b> | <b>0.004</b> | 6                | 649        | 3         | 726        | 0.406        |
| 0000228 | nuclear chromosome                         | 3                     | 1381        | 2             | 1603        | 0.868        | 3                | 652        | 0         | 729        | 0.211        |
| 0005634 | nucleus                                    | <b>149</b>            | <b>1235</b> | <b>223</b>    | <b>1382</b> | <b>0.011</b> | 72               | 583        | 77        | 652        | 0.864        |
| 0005635 | nuclear membrane                           | 7                     | 1377        | 10            | 1595        | 0.856        | 3                | 652        | 4         | 725        | 0.887        |
| 0005730 | nucleolus                                  | 5                     | 1379        | 6             | 1599        | 0.805        | 2                | 653        | 3         | 726        | 0.905        |
| 0005654 | nucleoplasm                                | 28                    | 1356        | 44            | 1561        | 0.247        | 16               | 639        | 12        | 717        | 0.39         |
| 0005777 | peroxisome                                 | 5                     | 1379        | 4             | 1601        | 0.824        | 5                | 650        | 0         | 729        | 0.056        |
| 0005886 | plasma membrane                            | 83                    | 1301        | 73            | 1532        | 0.09         | <b>49</b>        | <b>606</b> | <b>34</b> | <b>695</b> | <b>0.037</b> |
| 0005576 | extracellular region                       | 33                    | 1351        | 43            | 1562        | 0.694        | 15               | 640        | 18        | 711        | 0.967        |
| 0005578 | extracellular matrix (sensu Metazoa)       | 19                    | 1365        | 16            | 1589        | 0.434        | 9                | 646        | 10        | 719        | 0.82         |

| GO#     | GO term                                                                           | Representational bias |             |               |             |              | Directional bias |        |           |        |        |
|---------|-----------------------------------------------------------------------------------|-----------------------|-------------|---------------|-------------|--------------|------------------|--------|-----------|--------|--------|
|         |                                                                                   | regulated             |             | not regulated |             | $\rho$       | up-reg.          |        | down-reg. |        | $\rho$ |
|         |                                                                                   | term                  | n.term      | term          | n.term      |              | term             | n.term | term      | n.term |        |
| 0008150 | biological_process                                                                | 841                   | 589         | 913           | 646         | 0.92         | 510              | 362    | 331       | 227    | 0.797  |
| 0007610 | behavior                                                                          | 69                    | 1361        | 93            | 1466        | 0.196        | 47               | 825    | 22        | 536    | 0.263  |
| 0030534 | adult behavior                                                                    | 7                     | 1423        | 17            | 1542        | 0.102        | 5                | 867    | 2         | 556    | 0.857  |
| 0030537 | larval behavior                                                                   | 2                     | 1428        | 7             | 1552        | 0.228        | 1                | 871    | 1         | 557    | 0.684  |
| 0007611 | learning and/or memory                                                            | 12                    | 1418        | 12            | 1547        | 0.994        | 8                | 864    | 4         | 554    | 0.914  |
| 0007612 | learning                                                                          | 8                     | 1422        | 7             | 1552        | 0.867        | 6                | 866    | 2         | 556    | 0.651  |
| 0007613 | memory                                                                            | 4                     | 1426        | 7             | 1552        | 0.645        | 2                | 870    | 2         | 556    | 0.95   |
| 0007626 | locomotory behavior                                                               | 51                    | 1379        | 72            | 1487        | 0.176        | 32               | 840    | 19        | 539    | 0.907  |
| 0007635 | chemosensory behavior                                                             | 9                     | 1421        | 9             | 1550        | 0.958        | 7                | 865    | 2         | 556    | 0.488  |
| 0007622 | rhythmic behavior                                                                 | 6                     | 1424        | 9             | 1550        | 0.726        | 5                | 867    | 1         | 557    | 0.48   |
| 0048512 | circadian behavior                                                                | 5                     | 1425        | 9             | 1550        | 0.521        | 4                | 868    | 1         | 557    | 0.679  |
| 0009987 | cellular process                                                                  | 787                   | 643         | 841           | 718         | 0.575        | 468              | 404    | 319       | 239    | 0.214  |
| 0007154 | cell communication                                                                | 237                   | 1193        | 252           | 1307        | 0.801        | 148              | 724    | 89        | 469    | 0.664  |
| 0007155 | cell adhesion                                                                     | 42                    | 1388        | 48            | 1511        | 0.905        | 27               | 845    | 15        | 543    | 0.775  |
| 0008037 | cell recognition                                                                  | 0                     | 1430        | 2             | 1557        | 0.518        | 0                | 872    | 0         | 558    | -      |
| 0008038 | neuronal cell recognition                                                         | 0                     | 1430        | 2             | 1557        | 0.518        | 0                | 872    | 0         | 558    | -      |
| 0016337 | cell-cell adhesion                                                                | 19                    | 1411        | 20            | 1539        | 0.959        | 12               | 860    | 7         | 551    | 0.968  |
| 0016339 | calcium-dependent cell-cell adhesion                                              | 3                     | 1427        | 4             | 1555        | 0.909        | 1                | 871    | 2         | 556    | 0.696  |
| 0007156 | homophilic cell adhesion                                                          | 4                     | 1426        | 5             | 1554        | 0.897        | 2                | 870    | 2         | 556    | 0.95   |
| 0007160 | cell-matrix adhesion                                                              | 5                     | 1425        | 4             | 1555        | 0.897        | 4                | 868    | 1         | 557    | 0.679  |
| 0007267 | cell-cell signaling                                                               | 70                    | 1360        | 86            | 1473        | 0.496        | 46               | 826    | 24        | 534    | 0.479  |
| 0019226 | transmission of nerve impulse                                                     | 63                    | 1367        | 75            | 1484        | 0.66         | 41               | 831    | 22        | 536    | 0.582  |
| 0007268 | synaptic transmission                                                             | 43                    | 1387        | 58            | 1501        | 0.329        | 26               | 846    | 17        | 541    | 0.929  |
| 0007270 | nerve-nerve synaptic transmission                                                 | 9                     | 1421        | 7             | 1552        | 0.671        | 4                | 868    | 5         | 553    | 0.498  |
| 0001505 | regulation of neurotransmitter levels                                             | 26                    | 1404        | 34            | 1525        | 0.565        | 15               | 857    | 11        | 547    | 0.886  |
| 0042133 | neurotransmitter metabolism                                                       | 3                     | 1427        | 5             | 1554        | 0.817        | 1                | 871    | 2         | 556    | 0.696  |
| 0007269 | neurotransmitter secretion                                                        | 24                    | 1406        | 29            | 1530        | 0.812        | 14               | 858    | 10        | 548    | 0.955  |
| 0007165 | signal transduction                                                               | 189                   | 1241        | 190           | 1369        | 0.43         | 117              | 755    | 72        | 486    | 0.841  |
| 0007166 | cell surface receptor linked signal transduction                                  | 82                    | 1348        | 75            | 1484        | 0.294        | 53               | 819    | 29        | 529    | 0.56   |
| 0007167 | enzyme linked receptor protein signaling pathway                                  | 26                    | 1404        | 20            | 1539        | 0.299        | 15               | 857    | 11        | 547    | 0.886  |
| 0007178 | transmembrane receptor protein serine/threonine kinase signaling pathway          | 10                    | 1420        | 6             | 1553        | 0.354        | 4                | 868    | 6         | 552    | 0.299  |
| 0007179 | transforming growth factor beta receptor signaling pathway                        | 6                     | 1424        | 3             | 1556        | 0.425        | 2                | 870    | 4         | 554    | 0.331  |
| 0007169 | transmembrane receptor protein tyrosine kinase signaling pathway                  | 18                    | 1412        | 14            | 1545        | 0.436        | 11               | 861    | 7         | 551    | 0.817  |
| 0007173 | epidermal growth factor receptor signaling pathway                                | 7                     | 1423        | 1             | 1558        | 0.058        | 5                | 867    | 2         | 556    | 0.857  |
| 0008286 | insulin receptor signaling pathway                                                | 3                     | 1427        | 1             | 1558        | 0.557        | 2                | 870    | 1         | 557    | 0.696  |
| 0008293 | torso signaling pathway                                                           | 4                     | 1426        | 3             | 1556        | 0.909        | 2                | 870    | 2         | 556    | 0.95   |
| 0007186 | G-protein coupled receptor protein signaling pathway                              | 37                    | 1393        | 34            | 1525        | 0.543        | 24               | 848    | 13        | 545    | 0.749  |
| 0007200 | G-protein signaling, coupled to IP3 second messenger (phospholipase C activating) | 2                     | 1428        | 3             | 1556        | 0.923        | 0                | 872    | 2         | 556    | 0.297  |
| 0007219 | Notch signaling pathway                                                           | 7                     | 1423        | 6             | 1553        | 0.876        | 6                | 866    | 1         | 557    | 0.339  |
| 0007224 | smoothened signaling pathway                                                      | 2                     | 1428        | 4             | 1555        | 0.762        | 1                | 871    | 1         | 557    | 0.684  |
| 0008063 | Toll signaling pathway                                                            | 3                     | 1427        | 1             | 1558        | 0.557        | 1                | 871    | 2         | 556    | 0.696  |
| 0016055 | Wnt receptor signaling pathway                                                    | 9                     | 1421        | 7             | 1552        | 0.671        | 8                | 864    | 1         | 557    | 0.168  |
| 0007242 | intracellular signaling cascade                                                   | 88                    | 1342        | 94            | 1465        | 0.948        | 56               | 816    | 32        | 526    | 0.678  |
| 0007263 | nitric oxide mediated signal transduction                                         | 4                     | 1426        | 0             | 1559        | 0.112        | 4                | 868    | 0         | 558    | 0.276  |
| 0007243 | protein kinase cascade                                                            | 20                    | 1410        | 21            | 1538        | 0.971        | 9                | 863    | 11        | 547    | 0.213  |
| 0007259 | JAK-STAT cascade                                                                  | 2                     | 1428        | 4             | 1555        | 0.762        | 2                | 870    | 0         | 558    | 0.684  |
| 0000165 | MAPKK cascade                                                                     | 16                    | 1414        | 17            | 1542        | 0.92         | 7                | 865    | 9         | 549    | 0.245  |
| 0019932 | second-messenger-mediated signaling                                               | 8                     | 1422        | 14            | 1545        | 0.386        | 3                | 869    | 5         | 553    | 0.316  |
| 0019722 | calcium-mediated signaling                                                        | 6                     | 1424        | 9             | 1550        | 0.726        | 3                | 869    | 3         | 555    | 0.894  |
| 0048015 | phosphoinositide-mediated signaling                                               | 2                     | 1428        | 3             | 1556        | 0.923        | 0                | 872    | 2         | 556    | 0.297  |
| 0007264 | small GTPase mediated signal transduction                                         | 24                    | 1406        | 20            | 1539        | 0.456        | 15               | 857    | 9         | 549    | 0.955  |
| 0007265 | Ras protein signal transduction                                                   | 6                     | 1424        | 4             | 1555        | 0.65         | 3                | 869    | 3         | 555    | 0.894  |
| 0009966 | regulation of signal transduction                                                 | 19                    | 1411        | 15            | 1544        | 0.441        | 13               | 859    | 6         | 552    | 0.665  |
| 0007275 | development                                                                       | 237                   | 1193        | 223           | 1336        | 0.096        | 146              | 726    | 91        | 467    | 0.886  |
| 0007568 | aging                                                                             | 4                     | 1426        | 7             | 1552        | 0.645        | 2                | 870    | 2         | 556    | 0.95   |
| 0030154 | cell differentiation                                                              | <b>68</b>             | <b>1362</b> | <b>51</b>     | <b>1508</b> | <b>0.048</b> | 39               | 833    | 29        | 529    | 0.617  |
| 0048468 | cell development                                                                  | 38                    | 1392        | 37            | 1522        | 0.705        | 21               | 851    | 17        | 541    | 0.573  |
| 0000904 | cellular morphogenesis during differentiation                                     | 7                     | 1423        | 12            | 1547        | 0.464        | 3                | 869    | 4         | 554    | 0.551  |
| 0042461 | photoreceptor cell development                                                    | 7                     | 1423        | 11            | 1548        | 0.599        | 3                | 869    | 4         | 554    | 0.551  |
| 0042051 | eye photoreceptor development (sensu Endopterygota)                               | 7                     | 1423        | 10            | 1549        | 0.758        | 3                | 869    | 4         | 554    | 0.551  |
| 0045165 | cell fate commitment                                                              | <b>31</b>             | <b>1399</b> | <b>18</b>     | <b>1541</b> | <b>0.042</b> | 18               | 854    | 13        | 545    | 0.881  |

| GO#     | GO term                                                        | Representational bias |             |               |             |              | Directional bias |            |            |            |              |
|---------|----------------------------------------------------------------|-----------------------|-------------|---------------|-------------|--------------|------------------|------------|------------|------------|--------------|
|         |                                                                | regulated             |             | not regulated |             | $\rho$       | up-reg.          |            | down-reg.  |            | $\rho$       |
|         |                                                                | term                  | n.term      | term          | n.term      |              | term             | n.term     | term       | n.term     |              |
| 0001709 | cell fate determination                                        | 18                    | 1412        | 12            | 1547        | 0.248        | 12               | 860        | 6          | 552        | 0.799        |
| 0007400 | neuroblast cell fate determination                             | 4                     | 1426        | 4             | 1555        | 0.817        | 4                | 868        | 0          | 558        | 0.276        |
| 0001708 | cell fate specification                                        | 4                     | 1426        | 4             | 1555        | 0.817        | 3                | 869        | 1          | 557        | 0.95         |
| 0007349 | cellularization                                                | 5                     | 1425        | 6             | 1553        | 0.886        | 2                | 870        | 3          | 555        | 0.614        |
| 0040007 | growth                                                         | 17                    | 1413        | 19            | 1540        | 0.926        | 13               | 859        | 4          | 554        | 0.286        |
| 0002164 | larval development                                             | 10                    | 1420        | 7             | 1552        | 0.506        | 4                | 868        | 6          | 552        | 0.299        |
| 0002165 | larval or pupal development (sensu Insecta)                    | 65                    | 1365        | 64            | 1495        | 0.616        | 35               | 837        | 30         | 528        | 0.282        |
| 0007552 | metamorphosis                                                  | 58                    | 1372        | 63            | 1496        | 0.942        | 33               | 839        | 25         | 533        | 0.608        |
| 0009653 | morphogenesis                                                  | 162                   | 1268        | 157           | 1402        | 0.292        | 103              | 769        | 59         | 499        | 0.525        |
| 0002009 | morphogenesis of an epithelium                                 | 23                    | 1407        | 21            | 1538        | 0.659        | 13               | 859        | 10         | 548        | 0.821        |
| 0009887 | organogenesis                                                  | 144                   | 1286        | 138           | 1421        | 0.282        | 91               | 781        | 53         | 505        | 0.628        |
| 0001654 | eye morphogenesis                                              | 29                    | 1401        | 28            | 1531        | 0.742        | 13               | 859        | 16         | 542        | 0.108        |
| 0008406 | gonad development                                              | 4                     | 1426        | 7             | 1552        | 0.645        | 2                | 870        | 2          | 556        | 0.95         |
| 0007444 | imaginal disc development                                      | 50                    | 1380        | 43            | 1516        | 0.291        | 30               | 842        | 20         | 538        | 0.998        |
| 0007494 | midgut development                                             | 3                     | 1427        | 2             | 1557        | 0.923        | 1                | 871        | 2          | 556        | 0.696        |
| 0007517 | muscle development                                             | 13                    | 1417        | 21            | 1538        | 0.339        | 10               | 862        | 3          | 555        | 0.369        |
| 0007399 | neurogenesis                                                   | 85                    | 1345        | 77            | 1482        | 0.258        | 59               | 813        | 26         | 532        | 0.126        |
| 0007409 | axonogenesis                                                   | 19                    | 1411        | 24            | 1535        | 0.742        | 12               | 860        | 7          | 551        | 0.968        |
| 0007411 | axon guidance                                                  | 16                    | 1414        | 17            | 1542        | 0.92         | 10               | 862        | 6          | 552        | 0.895        |
| 0007417 | central nervous system development                             | 19                    | 1411        | 20            | 1539        | 0.959        | 15               | 857        | 4          | 554        | 0.168        |
| 0016358 | dendrite morphogenesis                                         | 7                     | 1423        | 7             | 1552        | 0.915        | 4                | 868        | 3          | 555        | 0.857        |
| 0042063 | gliogenesis                                                    | 4                     | 1426        | 7             | 1552        | 0.645        | 3                | 869        | 1          | 557        | 0.95         |
| 0007422 | peripheral nervous system development                          | 22                    | 1408        | 18            | 1541        | 0.451        | 16               | 856        | 6          | 552        | 0.359        |
| 0050767 | regulation of neurogenesis                                     | 2                     | 1428        | 3             | 1556        | 0.923        | 1                | 871        | 1          | 557        | 0.684        |
| 0007424 | tracheal system development (sensu Insecta)                    | 19                    | 1411        | 18            | 1541        | 0.791        | 13               | 859        | 6          | 552        | 0.665        |
| 0048513 | organ development                                              | 147                   | 1283        | 139           | 1420        | 0.229        | 93               | 779        | 54         | 504        | 0.61         |
| 0007389 | pattern specification                                          | 40                    | 1390        | 36            | 1523        | 0.465        | 27               | 845        | 13         | 545        | 0.488        |
| 0048066 | pigmentation                                                   | 4                     | 1426        | 7             | 1552        | 0.645        | 3                | 869        | 1          | 557        | 0.95         |
| 0009791 | post-embryonic development                                     | 10                    | 1420        | 7             | 1552        | 0.506        | 4                | 868        | 6          | 552        | 0.299        |
| 0009790 | embryonic development                                          | <b>59</b>             | <b>1371</b> | <b>41</b>     | <b>1518</b> | <b>0.03</b>  | 34               | 838        | 25         | 533        | 0.687        |
| 0007530 | sex determination                                              | 6                     | 1424        | 4             | 1555        | 0.65         | 5                | 867        | 1          | 557        | 0.48         |
| 0007548 | sex differentiation                                            | 8                     | 1422        | 11            | 1548        | 0.786        | 5                | 867        | 3          | 555        | 0.783        |
| 0019827 | stem cell maintenance                                          | 5                     | 1425        | 3             | 1556        | 0.634        | 3                | 869        | 2          | 556        | 0.679        |
| 0000003 | reproduction                                                   | 68                    | 1362        | 76            | 1483        | 0.946        | 41               | 831        | 27         | 531        | 0.993        |
| 0050793 | regulation of development                                      | 22                    | 1408        | 21            | 1538        | 0.775        | 17               | 855        | 5          | 553        | 0.174        |
| 0007582 | physiological process                                          | 773                   | 657         | 832           | 727         | 0.734        | 460              | 412        | 313        | 245        | 0.237        |
| 0008152 | metabolism                                                     | 574                   | 856         | 592           | 967         | 0.24         | 333              | 539        | 241        | 317        | 0.068        |
| 0009056 | catabolism                                                     | 97                    | 1333        | 112           | 1447        | 0.721        | <b>43</b>        | <b>829</b> | <b>54</b>  | <b>504</b> | <b>7E-04</b> |
| 0006091 | energy pathways                                                | 45                    | 1385        | 63            | 1496        | 0.226        | <b>18</b>        | <b>854</b> | <b>27</b>  | <b>531</b> | <b>0.005</b> |
| 0006118 | electron transport                                             | 23                    | 1407        | 32            | 1527        | 0.443        | 11               | 861        | 12         | 546        | 0.277        |
| 0006139 | nucleobase, nucleoside, nucleotide and nucleic acid metabolism | <b>230</b>            | <b>1200</b> | <b>202</b>    | <b>1357</b> | <b>0.017</b> | 140              | 732        | 90         | 468        | 0.971        |
| 0006259 | DNA metabolism                                                 | 42                    | 1388        | 37            | 1522        | 0.398        | 28               | 844        | 14         | 544        | 0.544        |
| 0006350 | transcription                                                  | 120                   | 1310        | 107           | 1452        | 0.132        | 73               | 799        | 47         | 511        | 0.949        |
| 0043170 | macromolecule metabolism                                       | 296                   | 1134        | 332           | 1227        | 0.723        | <b>153</b>       | <b>719</b> | <b>143</b> | <b>415</b> | <b>3E-04</b> |
| 0019538 | protein metabolism                                             | 256                   | 1174        | 271           | 1288        | 0.746        | <b>128</b>       | <b>744</b> | <b>128</b> | <b>430</b> | <b>9E-05</b> |
| 0006412 | protein biosynthesis                                           | 51                    | 1379        | 59            | 1500        | 0.827        | 30               | 842        | 21         | 537        | 0.861        |
| 0006464 | protein modification                                           | 121                   | 1309        | 135           | 1424        | 0.898        | <b>61</b>        | <b>811</b> | <b>60</b>  | <b>498</b> | <b>0.017</b> |
| 0006457 | protein folding                                                | 17                    | 1413        | 26            | 1533        | 0.345        | 7                | 865        | 10         | 548        | 0.152        |
| 0005975 | carbohydrate metabolism                                        | 45                    | 1385        | 62            | 1497        | 0.262        | 29               | 843        | 16         | 542        | 0.742        |
| 0006519 | amino acid and derivative metabolism                           | 30                    | 1400        | 40            | 1519        | 0.469        | 19               | 853        | 11         | 547        | 0.938        |
| 0006629 | lipid metabolism                                               | 42                    | 1388        | 47            | 1512        | 0.986        | 31               | 841        | 11         | 547        | 0.116        |
| 0009308 | amine metabolism                                               | 34                    | 1396        | 47            | 1512        | 0.338        | 21               | 851        | 13         | 545        | 0.934        |
| 0042440 | pigment metabolism                                             | 3                     | 1427        | 9             | 1550        | 0.194        | 2                | 870        | 1          | 557        | 0.696        |
| 0042445 | hormone metabolism                                             | 2                     | 1428        | 5             | 1554        | 0.52         | 1                | 871        | 1          | 557        | 0.684        |
| 0009058 | biosynthesis                                                   | 90                    | 1340        | 114           | 1445        | 0.303        | 56               | 816        | 34         | 524        | 0.89         |
| 0019748 | secondary metabolism                                           | 4                     | 1426        | 10            | 1549        | 0.239        | 2                | 870        | 2          | 556        | 0.95         |
| 0019222 | regulation of metabolism                                       | 119                   | 1311        | 119           | 1440        | 0.531        | 71               | 801        | 48         | 510        | 0.834        |
| 0016265 | death                                                          | 45                    | 1385        | 41            | 1518        | 0.462        | 25               | 847        | 20         | 538        | 0.547        |
| 0008219 | cell death                                                     | 41                    | 1389        | 33            | 1526        | 0.23         | 23               | 849        | 18         | 540        | 0.626        |
| 0016271 | tissue death                                                   | 9                     | 1421        | 18            | 1541        | 0.186        | 5                | 867        | 4          | 554        | 0.993        |
| 0042592 | homeostasis                                                    | 15                    | 1415        | 14            | 1545        | 0.815        | 8                | 864        | 7          | 551        | 0.731        |
| 0019725 | cell homeostasis                                               | 14                    | 1416        | 12            | 1547        | 0.676        | 7                | 865        | 7          | 551        | 0.568        |
| 0050801 | ion homeostasis                                                | 9                     | 1421        | 5             | 1554        | 0.334        | 3                | 869        | 6          | 552        | 0.173        |
| 0043062 | extracellular structure organization and biogenesis            | 5                     | 1425        | 14            | 1545        | 0.098        | 3                | 869        | 2          | 556        | 0.679        |
| 0046903 | secretion                                                      | 46                    | 1384        | 55            | 1504        | 0.712        | 27               | 845        | 19         | 539        | 0.866        |
| 0048511 | rhythmic process                                               | 8                     | 1422        | 9             | 1550        | 0.858        | 6                | 866        | 2          | 556        | 0.651        |

PCA

| GO#     | GO term                                                       | Representational bias |        |               |        |        | Directional bias |        |           |        |        |
|---------|---------------------------------------------------------------|-----------------------|--------|---------------|--------|--------|------------------|--------|-----------|--------|--------|
|         |                                                               | regulated             |        | not regulated |        | $\rho$ | up-reg.          |        | down-reg. |        | $\rho$ |
|         |                                                               | term                  | n.term | term          | n.term |        | term             | n.term | term      | n.term |        |
| 0050791 | regulation of physiological process                           | 184                   | 1246   | 163           | 1396   | 0.046  | 105              | 767    | 79        | 479    | 0.278  |
| 0050874 | organismal physiological process                              | 102                   | 1328   | 130           | 1429   | 0.245  | 67               | 805    | 35        | 523    | 0.365  |
| 0050875 | cellular physiological process                                | 733                   | 697    | 786           | 773    | 0.672  | 429              | 443    | 304       | 254    | 0.058  |
| 0006810 | transport                                                     | 183                   | 1247   | 215           | 1344   | 0.456  | 111              | 761    | 72        | 486    | 0.988  |
| 0006811 | ion transport                                                 | 58                    | 1372   | 62            | 1497   | 0.987  | 36               | 836    | 22        | 536    | 0.971  |
| 0006818 | hydrogen transport                                            | 9                     | 1421   | 9             | 1550   | 0.958  | 1                | 871    | 8         | 550    | 0.006  |
| 0006836 | neurotransmitter transport                                    | 2                     | 1428   | 3             | 1556   | 0.923  | 1                | 871    | 1         | 557    | 0.684  |
| 0006858 | extracellular transport                                       | 9                     | 1421   | 6             | 1553   | 0.493  | 7                | 865    | 2         | 556    | 0.488  |
| 0006869 | lipid transport                                               | 9                     | 1421   | 7             | 1552   | 0.671  | 8                | 864    | 1         | 557    | 0.168  |
| 0008643 | carbohydrate transport                                        | 9                     | 1421   | 6             | 1553   | 0.493  | 6                | 866    | 3         | 555    | 0.993  |
| 0015031 | protein transport                                             | 81                    | 1349   | 99            | 1460   | 0.477  | 46               | 826    | 35        | 523    | 0.497  |
| 0015837 | amine transport                                               | 6                     | 1424   | 6             | 1553   | 0.889  | 4                | 868    | 2         | 556    | 0.894  |
| 0015931 | nucleobase, nucleoside, nucleotide and nucleic acid transport | 5                     | 1425   | 8             | 1551   | 0.689  | 2                | 870    | 3         | 555    | 0.614  |
| 0016192 | vesicle-mediated transport                                    | 53                    | 1377   | 66            | 1493   | 0.52   | 31               | 841    | 22        | 536    | 0.814  |
| 0045045 | secretory pathway                                             | 45                    | 1385   | 50            | 1509   | 0.992  | 26               | 846    | 19        | 539    | 0.77   |
| 0046907 | intracellular transport                                       | 90                    | 1340   | 108           | 1451   | 0.534  | 52               | 820    | 38        | 520    | 0.595  |
| 0051049 | regulation of transport                                       | 11                    | 1419   | 7             | 1552   | 0.371  | 7                | 865    | 4         | 554    | 0.897  |
| 0008283 | cell proliferation                                            | 42                    | 1388   | 29            | 1530   | 0.07   | 28               | 844    | 14        | 544    | 0.544  |
| 0007049 | cell cycle                                                    | 63                    | 1367   | 65            | 1494   | 0.819  | 39               | 833    | 24        | 534    | 0.982  |
| 0017145 | stem cell division                                            | 6                     | 1424   | 6             | 1553   | 0.889  | 6                | 866    | 0         | 558    | 0.123  |
| 0016043 | cell organization and biogenesis                              | 136                   | 1294   | 139           | 1420   | 0.618  | 79               | 793    | 57        | 501    | 0.526  |
| 0000902 | cellular morphogenesis                                        | 40                    | 1390   | 40            | 1519   | 0.781  | 25               | 847    | 15        | 543    | 0.972  |
| 0006996 | organelle organization and biogenesis                         | 119                   | 1311   | 119           | 1440   | 0.531  | 71               | 801    | 48        | 510    | 0.834  |
| 0007010 | cytoskeleton organization and biogenesis                      | 84                    | 1346   | 86            | 1473   | 0.732  | 51               | 821    | 33        | 525    | 0.949  |
| 0006997 | nuclear organization and biogenesis                           | 6                     | 1424   | 4             | 1555   | 0.65   | 3                | 869    | 3         | 555    | 0.894  |
| 0007028 | cytoplasm organization and biogenesis                         | 8                     | 1422   | 11            | 1548   | 0.786  | 5                | 867    | 3         | 555    | 0.783  |
| 0016044 | membrane organization and biogenesis                          | 3                     | 1427   | 6             | 1553   | 0.59   | 2                | 870    | 1         | 557    | 0.696  |
| 0051128 | regulation of cell organization and biogenesis                | 5                     | 1425   | 6             | 1553   | 0.886  | 3                | 869    | 2         | 556    | 0.679  |
| 0016049 | cell growth                                                   | 6                     | 1424   | 3             | 1556   | 0.425  | 6                | 866    | 0         | 558    | 0.123  |
| 0050896 | response to stimulus                                          | 79                    | 1351   | 102           | 1457   | 0.276  | 52               | 820    | 27        | 531    | 0.43   |
| 0006950 | response to stress                                            | 29                    | 1401   | 30            | 1529   | 0.943  | 20               | 852    | 9         | 549    | 0.485  |
| 0009408 | response to heat                                              | 5                     | 1425   | 5             | 1554   | 0.857  | 3                | 869    | 2         | 556    | 0.679  |
| 0006979 | response to oxidative stress                                  | 0                     | 1430   | 2             | 1557   | 0.518  | 0                | 872    | 0         | 558    | -      |
| 0051179 | localization                                                  | 199                   | 1231   | 230           | 1329   | 0.549  | 122              | 750    | 77        | 481    | 0.981  |
| 0006403 | RNA localization                                              | 15                    | 1415   | 17            | 1542   | 0.946  | 10               | 862    | 5         | 553    | 0.851  |
| 0008104 | protein localization                                          | 89                    | 1341   | 106           | 1453   | 0.574  | 52               | 820    | 37        | 521    | 0.691  |
| 0051234 | establishment of localization                                 | 184                   | 1246   | 219           | 1340   | 0.373  | 112              | 760    | 72        | 486    | 0.961  |
| 0051235 | maintenance of localization                                   | 3                     | 1427   | 1             | 1558   | 0.557  | 1                | 871    | 2         | 556    | 0.696  |
| 0050789 | regulation of biological process                              | 206                   | 1224   | 197           | 1362   | 0.173  | 121              | 751    | 85        | 473    | 0.525  |
| 0050790 | regulation of enzyme activity                                 | 4                     | 1426   | 10            | 1549   | 0.239  | 4                | 868    | 0         | 558    | 0.276  |
| 0040029 | regulation of gene expression, epigenetic                     | 8                     | 1422   | 12            | 1547   | 0.631  | 5                | 867    | 3         | 555    | 0.783  |
| 0006306 | DNA methylation                                               | 2                     | 1428   | 5             | 1554   | 0.52   | 2                | 870    | 0         | 558    | 0.684  |
| 0045814 | negative regulation of gene expression, epigenetic            | 4                     | 1426   | 3             | 1556   | 0.909  | 3                | 869    | 1         | 557    | 0.95   |
| 0006342 | chromatin silencing                                           | 4                     | 1426   | 3             | 1556   | 0.909  | 3                | 869    | 1         | 557    | 0.95   |
| 0003674 | molecular_function                                            | 833                   | 597    | 899           | 660    | 0.774  | 499              | 373    | 334       | 224    | 0.353  |
| 0016209 | antioxidant activity                                          | 3                     | 1427   | 6             | 1553   | 0.59   | 1                | 871    | 2         | 556    | 0.696  |
| 0005488 | binding                                                       | 488                   | 942    | 519           | 1040   | 0.657  | 300              | 572    | 188       | 370    | 0.826  |
| 0005509 | calcium ion binding                                           | 24                    | 1406   | 37            | 1522   | 0.225  | 14               | 858    | 10        | 548    | 0.955  |
| 0030246 | carbohydrate binding                                          | 6                     | 1424   | 9             | 1550   | 0.726  | 4                | 868    | 2         | 556    | 0.894  |
| 0008289 | lipid binding                                                 | 10                    | 1420   | 16            | 1543   | 0.445  | 6                | 866    | 4         | 554    | 0.794  |
| 0003676 | nucleic acid binding                                          | 204                   | 1226   | 185           | 1374   | 0.058  | 123              | 749    | 81        | 477    | 0.889  |
| 0003677 | DNA binding                                                   | 99                    | 1331   | 95            | 1464   | 0.398  | 61               | 811    | 38        | 520    | 0.978  |
| 0003682 | chromatin binding                                             | 11                    | 1419   | 12            | 1547   | 0.835  | 9                | 863    | 2         | 556    | 0.266  |
| 0003700 | transcription factor activity                                 | 42                    | 1388   | 44            | 1515   | 0.938  | 22               | 850    | 20        | 538    | 0.318  |
| 0003723 | RNA binding                                                   | 62                    | 1368   | 57            | 1502   | 0.392  | 40               | 832    | 22        | 536    | 0.652  |
| 0008135 | translation factor activity, nucleic acid binding             | 20                    | 1410   | 15            | 1544   | 0.348  | 7                | 865    | 13        | 545    | 0.03   |
| 0000166 | nucleotide binding                                            | 122                   | 1308   | 133           | 1426   | 0.948  | 74               | 798    | 48        | 510    | 0.984  |
| 0005515 | protein binding                                               | 184                   | 1246   | 195           | 1364   | 0.811  | 115              | 757    | 69        | 489    | 0.71   |
| 0008134 | transcription factor binding                                  | 17                    | 1413   | 14            | 1545   | 0.546  | 11               | 861    | 6         | 552    | 0.947  |
| 0008092 | cytoskeletal protein binding                                  | 35                    | 1395   | 53            | 1506   | 0.153  | 25               | 847    | 10        | 548    | 0.268  |
| 0003779 | actin binding                                                 | 20                    | 1410   | 33            | 1526   | 0.178  | 12               | 860    | 8         | 550    | 0.888  |
| 0003824 | catalytic activity                                            | 397                   | 1033   | 442           | 1117   | 0.751  | 223              | 649    | 174       | 384    | 0.024  |
| 0016787 | hydrolase activity                                            | 183                   | 1247   | 189           | 1370   | 0.616  | 94               | 778    | 89        | 469    | 0.006  |
| 0003924 | GTPase activity                                               | 20                    | 1410   | 20            | 1539   | 0.908  | 12               | 860    | 8         | 550    | 0.888  |
| 0004518 | nuclease activity                                             | 7                     | 1423   | 8             | 1551   | 0.867  | 7                | 865    | 0         | 558    | 0.083  |



## PC4

| GO#     | GO term                                    | Representational bias |             |               |             |              | Directional bias |            |            |            |              |
|---------|--------------------------------------------|-----------------------|-------------|---------------|-------------|--------------|------------------|------------|------------|------------|--------------|
|         |                                            | regulated             |             | not regulated |             | $\rho$       | up-reg.          |            | down-reg.  |            | $\rho$       |
|         |                                            | term                  | n.term      | term          | n.term      |              | term             | n.term     | term       | n.term     |              |
| 0008233 | peptidase activity                         | 55                    | 1375        | 63            | 1496        | 0.858        | <b>18</b>        | <b>854</b> | <b>37</b>  | <b>521</b> | <b>2E-05</b> |
| 0004721 | phosphoprotein phosphatase activity        | 16                    | 1414        | 14            | 1545        | 0.673        | 8                | 864        | 8          | 550        | 0.517        |
| 0016740 | transferase activity                       | 110                   | 1320        | 131           | 1428        | 0.519        | 72               | 800        | 38         | 520        | 0.368        |
| 0016301 | kinase activity                            | 59                    | 1371        | 76            | 1483        | 0.37         | 40               | 832        | 19         | 539        | 0.337        |
| 0004672 | protein kinase activity                    | 41                    | 1389        | 54            | 1505        | 0.41         | 26               | 846        | 15         | 543        | 0.871        |
| 0030234 | enzyme regulator activity                  | 42                    | 1388        | 63            | 1496        | 0.124        | 26               | 846        | 16         | 542        | 0.972        |
| 0003774 | motor activity                             | 17                    | 1413        | 11            | 1548        | 0.238        | 13               | 859        | 4          | 554        | 0.286        |
| 0004871 | signal transducer activity                 | 132                   | 1298        | 124           | 1435        | 0.238        | 87               | 785        | 45         | 513        | 0.261        |
| 0004872 | receptor activity                          | 59                    | 1371        | 50            | 1509        | 0.215        | 41               | 831        | 18         | 540        | 0.218        |
| 0004879 | ligand-dependent nuclear receptor activity | 6                     | 1424        | 3             | 1556        | 0.425        | 4                | 868        | 2          | 556        | 0.894        |
| 0004888 | transmembrane receptor activity            | 43                    | 1387        | 31            | 1528        | 0.094        | 29               | 843        | 14         | 544        | 0.469        |
| 0004930 | G-protein coupled receptor activity        | 19                    | 1411        | 11            | 1548        | 0.128        | 11               | 861        | 8          | 550        | 0.968        |
| 0005057 | receptor signaling protein activity        | 38                    | 1392        | 42            | 1517        | 0.959        | 23               | 849        | 15         | 543        | 0.912        |
| 0005102 | receptor binding                           | 30                    | 1400        | 39            | 1520        | 0.54         | 19               | 853        | 11         | 547        | 0.938        |
| 0005198 | structural molecule activity               | 75                    | 1355        | 87            | 1472        | 0.746        | 52               | 820        | 23         | 535        | 0.161        |
| 0030528 | transcription regulator activity           | 104                   | 1326        | 95            | 1464        | 0.223        | 63               | 809        | 41         | 517        | 0.986        |
| 0045182 | translation regulator activity             | 20                    | 1410        | 15            | 1544        | 0.348        | <b>7</b>         | <b>865</b> | <b>13</b>  | <b>545</b> | <b>0.03</b>  |
| 0005215 | transporter activity                       | 115                   | 1315        | 138           | 1421        | 0.466        | 62               | 810        | 53         | 505        | 0.128        |
| 0005489 | electron transporter activity              | 14                    | 1416        | 15            | 1544        | 0.889        | 5                | 867        | 9          | 549        | 0.094        |
| 0005216 | ion channel activity                       | 23                    | 1407        | 29            | 1530        | 0.7          | 16               | 856        | 7          | 551        | 0.525        |
| 0005244 | voltage-gated ion channel activity         | 13                    | 1417        | 13            | 1546        | 0.981        | 11               | 861        | 2          | 556        | 0.142        |
| 0005575 | cellular_component                         | 601                   | 829         | 622           | 937         | 0.252        | 352              | 520        | 249        | 309        | 0.125        |
| 0005623 | cell                                       | 555                   | 875         | 557           | 1002        | 0.088        | 327              | 545        | 228        | 330        | 0.224        |
| 0005622 | intracellular                              | 425                   | 1005        | 432           | 1127        | 0.241        | <b>239</b>       | <b>633</b> | <b>186</b> | <b>372</b> | <b>0.02</b>  |
| 0005737 | cytoplasm                                  | 212                   | 1218        | 246           | 1313        | 0.501        | <b>101</b>       | <b>771</b> | <b>111</b> | <b>447</b> | <b>2E-05</b> |
| 0016023 | cytoplasmic vesicle                        | 16                    | 1414        | 25            | 1534        | 0.327        | 7                | 865        | 9          | 549        | 0.245        |
| 0005829 | cytosol                                    | <b>47</b>             | <b>1383</b> | <b>32</b>     | <b>1527</b> | <b>0.047</b> | <b>17</b>        | <b>855</b> | <b>30</b>  | <b>528</b> | <b>7E-04</b> |
| 0005783 | endoplasmic reticulum                      | 31                    | 1399        | 26            | 1533        | 0.387        | <b>9</b>         | <b>863</b> | <b>22</b>  | <b>536</b> | <b>5E-04</b> |
| 0005794 | Golgi apparatus                            | 10                    | 1420        | 15            | 1544        | 0.557        | 8                | 864        | 2          | 556        | 0.362        |
| 0005815 | microtubule organizing center              | 2                     | 1428        | 7             | 1552        | 0.228        | 1                | 871        | 1          | 557        | 0.684        |
| 0005739 | mitochondrion                              | 43                    | 1387        | 62            | 1497        | 0.18         | 20               | 852        | 23         | 535        | 0.069        |
| 0005840 | ribosome                                   | 7                     | 1423        | 17            | 1542        | 0.102        | 5                | 867        | 2          | 556        | 0.857        |
| 0005773 | vacuole                                    | 9                     | 1421        | 5             | 1554        | 0.334        | 3                | 869        | 6          | 552        | 0.173        |
| 0005764 | lysosome                                   | 3                     | 1427        | 2             | 1557        | 0.923        | 3                | 869        | 0          | 558        | 0.427        |
| 0005856 | cytoskeleton                               | 42                    | 1388        | 43            | 1516        | 0.854        | <b>34</b>        | <b>838</b> | <b>8</b>   | <b>550</b> | <b>0.011</b> |
| 0005694 | chromosome                                 | 22                    | 1408        | 18            | 1541        | 0.451        | 15               | 857        | 7          | 551        | 0.633        |
| 0000228 | nuclear chromosome                         | 2                     | 1428        | 3             | 1556        | 0.923        | 1                | 871        | 1          | 557        | 0.684        |
| 0005634 | nucleus                                    | <b>201</b>            | <b>1229</b> | <b>171</b>    | <b>1388</b> | <b>0.012</b> | 114              | 758        | 87         | 471        | 0.208        |
| 0005635 | nuclear membrane                           | 8                     | 1422        | 9             | 1550        | 0.858        | 7                | 865        | 1          | 557        | 0.239        |
| 0005730 | nucleolus                                  | 4                     | 1426        | 7             | 1552        | 0.645        | 1                | 871        | 3          | 555        | 0.335        |
| 0005654 | nucleoplasm                                | 35                    | 1395        | 37            | 1522        | 0.99         | 24               | 848        | 11         | 547        | 0.449        |
| 0005777 | peroxisome                                 | 3                     | 1427        | 6             | 1553        | 0.59         | 2                | 870        | 1          | 557        | 0.696        |
| 0005886 | plasma membrane                            | 84                    | 1346        | 72            | 1487        | 0.144        | 52               | 820        | 32         | 526        | 0.949        |
| 0005576 | extracellular region                       | 36                    | 1394        | 40            | 1519        | 0.974        | 22               | 850        | 14         | 544        | 0.876        |
| 0005578 | extracellular matrix (sensu Metazoa)       | 20                    | 1410        | 15            | 1544        | 0.348        | 13               | 859        | 7          | 551        | 0.888        |

## PC5

| GO#     | GO term                                                                           | Representational bias |             |               |             |              | Directional bias |            |            |            |              |
|---------|-----------------------------------------------------------------------------------|-----------------------|-------------|---------------|-------------|--------------|------------------|------------|------------|------------|--------------|
|         |                                                                                   | regulated             |             | not regulated |             | $\rho$       | up-reg.          |            | down-reg.  |            | $\rho$       |
|         |                                                                                   | term                  | n.term      | term          | n.term      |              | term             | n.term     | term       | n.term     |              |
| 0008150 | biological_process                                                                | <b>971</b>            | <b>623</b>  | <b>783</b>    | <b>612</b>  | <b>0.009</b> | 370              | 251        | 601        | 372        | 0.412        |
| 0007610 | behavior                                                                          | 83                    | 1511        | 79            | 1316        | 0.639        | <b>54</b>        | <b>567</b> | <b>29</b>  | <b>944</b> | <b>1E-06</b> |
| 0030534 | adult behavior                                                                    | 11                    | 1583        | 13            | 1382        | 0.594        | <b>9</b>         | <b>612</b> | <b>2</b>   | <b>971</b> | <b>0.009</b> |
| 0030537 | larval behavior                                                                   | 4                     | 1590        | 5             | 1390        | 0.841        | 2                | 619        | 2          | 971        | 0.952        |
| 0007611 | learning and/or memory                                                            | 11                    | 1583        | 13            | 1382        | 0.594        | <b>9</b>         | <b>612</b> | <b>2</b>   | <b>971</b> | <b>0.009</b> |
| 0007612 | learning                                                                          | 9                     | 1585        | 6             | 1389        | 0.795        | <b>7</b>         | <b>614</b> | <b>2</b>   | <b>971</b> | <b>0.04</b>  |
| 0007613 | memory                                                                            | 4                     | 1590        | 7             | 1388        | 0.408        | 3                | 618        | 1          | 972        | 0.334        |
| 0007626 | locomotory behavior                                                               | 63                    | 1531        | 60            | 1335        | 0.699        | <b>41</b>        | <b>580</b> | <b>22</b>  | <b>951</b> | <b>3E-05</b> |
| 0007635 | chemosensory behavior                                                             | 10                    | 1584        | 8             | 1387        | 0.963        | <b>8</b>         | <b>613</b> | <b>2</b>   | <b>971</b> | <b>0.019</b> |
| 0007622 | rhythmic behavior                                                                 | 9                     | 1585        | 6             | 1389        | 0.795        | <b>7</b>         | <b>614</b> | <b>2</b>   | <b>971</b> | <b>0.04</b>  |
| 0048512 | circadian behavior                                                                | 8                     | 1586        | 6             | 1389        | 0.985        | 6                | 615        | 2          | 971        | 0.083        |
| 0009987 | cellular process                                                                  | <b>904</b>            | <b>690</b>  | <b>724</b>    | <b>671</b>  | <b>0.009</b> | 349              | 272        | 555        | 418        | 0.781        |
| 0007154 | cell communication                                                                | 248                   | 1346        | 241           | 1154        | 0.224        | <b>157</b>       | <b>464</b> | <b>91</b>  | <b>882</b> | <b>2E-17</b> |
| 0007155 | cell adhesion                                                                     | <b>38</b>             | <b>1556</b> | <b>52</b>     | <b>1343</b> | <b>0.042</b> | 20               | 601        | 18         | 955        | 0.114        |
| 0008037 | cell recognition                                                                  | 2                     | 1592        | 0             | 1395        | 0.539        | 2                | 619        | 0          | 973        | 0.296        |
| 0008038 | neuronal cell recognition                                                         | 2                     | 1592        | 0             | 1395        | 0.539        | 2                | 619        | 0          | 973        | 0.296        |
| 0016337 | cell-cell adhesion                                                                | 15                    | 1579        | 24            | 1371        | 0.087        | 7                | 614        | 8          | 965        | 0.727        |
| 0016339 | calcium-dependent cell-cell adhesion                                              | 2                     | 1592        | 5             | 1390        | 0.35         | 1                | 620        | 1          | 972        | 0.685        |
| 0007156 | homophilic cell adhesion                                                          | 3                     | 1591        | 6             | 1389        | 0.384        | 2                | 619        | 1          | 972        | 0.695        |
| 0007160 | cell-matrix adhesion                                                              | 2                     | 1592        | 7             | 1388        | 0.124        | 1                | 620        | 1          | 972        | 0.685        |
| 0007267 | cell-cell signaling                                                               | 89                    | 1505        | 67            | 1328        | 0.382        | <b>62</b>        | <b>559</b> | <b>27</b>  | <b>946</b> | <b>2E-09</b> |
| 0019226 | transmission of nerve impulse                                                     | 77                    | 1517        | 61            | 1334        | 0.612        | <b>54</b>        | <b>567</b> | <b>23</b>  | <b>950</b> | <b>2E-08</b> |
| 0007268 | synaptic transmission                                                             | 59                    | 1535        | 42            | 1353        | 0.347        | <b>43</b>        | <b>578</b> | <b>16</b>  | <b>957</b> | <b>1E-07</b> |
| 0007270 | nerve-nerve synaptic transmission                                                 | 11                    | 1583        | 5             | 1390        | 0.323        | <b>10</b>        | <b>611</b> | <b>1</b>   | <b>972</b> | <b>0.001</b> |
| 0001505 | regulation of neurotransmitter levels                                             | 34                    | 1560        | 26            | 1369        | 0.694        | <b>24</b>        | <b>597</b> | <b>10</b>  | <b>963</b> | <b>3E-04</b> |
| 0042133 | neurotransmitter metabolism                                                       | 5                     | 1589        | 3             | 1392        | 0.868        | <b>5</b>         | <b>616</b> | <b>0</b>   | <b>973</b> | <b>0.019</b> |
| 0007269 | neurotransmitter secretion                                                        | 30                    | 1564        | 23            | 1372        | 0.731        | <b>20</b>        | <b>601</b> | <b>10</b>  | <b>963</b> | <b>0.003</b> |
| 0007165 | signal transduction                                                               | 187                   | 1407        | 192           | 1203        | 0.107        | <b>117</b>       | <b>504</b> | <b>70</b>  | <b>903</b> | <b>3E-12</b> |
| 0007166 | cell surface receptor linked signal transduction                                  | 75                    | 1519        | 82            | 1313        | 0.176        | <b>54</b>        | <b>567</b> | <b>21</b>  | <b>952</b> | <b>4E-09</b> |
| 0007167 | enzyme linked receptor protein signaling pathway                                  | 21                    | 1573        | 25            | 1370        | 0.367        | <b>16</b>        | <b>605</b> | <b>5</b>   | <b>968</b> | <b>1E-03</b> |
| 0007178 | transmembrane receptor protein serine/threonine kinase signaling pathway          | 9                     | 1585        | 7             | 1388        | 0.987        | <b>7</b>         | <b>614</b> | <b>2</b>   | <b>971</b> | <b>0.04</b>  |
| 0007179 | transforming growth factor beta receptor signaling pathway                        | 5                     | 1589        | 4             | 1391        | 0.841        | 3                | 618        | 2          | 971        | 0.612        |
| 0007169 | transmembrane receptor protein tyrosine kinase signaling pathway                  | 13                    | 1581        | 19            | 1376        | 0.204        | <b>10</b>        | <b>611</b> | <b>3</b>   | <b>970</b> | <b>0.011</b> |
| 0007173 | epidermal growth factor receptor signaling pathway                                | 2                     | 1592        | 6             | 1389        | 0.21         | 2                | 619        | 0          | 973        | 0.296        |
| 0008286 | insulin receptor signaling pathway                                                | 1                     | 1593        | 3             | 1392        | 0.525        | 0                | 621        | 1          | 972        | 0.821        |
| 0008293 | torso signaling pathway                                                           | 4                     | 1590        | 3             | 1392        | 0.86         | 3                | 618        | 1          | 972        | 0.334        |
| 0007186 | G-protein coupled receptor protein signaling pathway                              | 35                    | 1559        | 36            | 1359        | 0.569        | <b>24</b>        | <b>597</b> | <b>11</b>  | <b>962</b> | <b>5E-04</b> |
| 0007200 | G-protein signaling, coupled to IP3 second messenger (phospholipase C activating) | 5                     | 1589        | 0             | 1395        | 0.1          | 4                | 617        | 1          | 972        | 0.154        |
| 0007219 | Notch signaling pathway                                                           | 7                     | 1587        | 6             | 1389        | 0.809        | <b>6</b>         | <b>615</b> | <b>1</b>   | <b>972</b> | <b>0.031</b> |
| 0007224 | smoothened signaling pathway                                                      | 5                     | 1589        | 1             | 1394        | 0.287        | 3                | 618        | 2          | 971        | 0.612        |
| 0008063 | Toll signaling pathway                                                            | 0                     | 1594        | 4             | 1391        | 0.101        | 0                | 621        | 0          | 973        | -            |
| 0016055 | Wnt receptor signaling pathway                                                    | 6                     | 1588        | 10            | 1385        | 0.307        | 5                | 616        | 1          | 972        | 0.07         |
| 0007242 | intracellular signaling cascade                                                   | 98                    | 1496        | 84            | 1311        | 0.946        | <b>65</b>        | <b>556</b> | <b>33</b>  | <b>940</b> | <b>2E-08</b> |
| 0007263 | nitric oxide mediated signal transduction                                         | 3                     | 1591        | 1             | 1394        | 0.713        | 3                | 618        | 0          | 973        | 0.115        |
| 0007243 | protein kinase cascade                                                            | 23                    | 1571        | 18            | 1377        | 0.841        | <b>16</b>        | <b>605</b> | <b>7</b>   | <b>966</b> | <b>0.005</b> |
| 0007259 | JAK-STAT cascade                                                                  | 2                     | 1592        | 4             | 1391        | 0.567        | 0                | 621        | 2          | 971        | 0.685        |
| 0000165 | MAPKKK cascade                                                                    | 19                    | 1575        | 14            | 1381        | 0.752        | <b>14</b>        | <b>607</b> | <b>5</b>   | <b>968</b> | <b>0.004</b> |
| 0019932 | second-messenger-mediated signaling                                               | 11                    | 1583        | 11            | 1384        | 0.921        | 7                | 614        | 4          | 969        | 0.169        |
| 0019722 | calcium-mediated signaling                                                        | 6                     | 1588        | 9             | 1386        | 0.437        | 3                | 618        | 3          | 970        | 0.892        |
| 0048015 | phosphoinositide-mediated signaling                                               | 5                     | 1589        | 0             | 1395        | 0.1          | 4                | 617        | 1          | 972        | 0.154        |
| 0007264 | small GTPase mediated signal transduction                                         | 27                    | 1567        | 17            | 1378        | 0.355        | <b>16</b>        | <b>605</b> | <b>11</b>  | <b>962</b> | <b>0.047</b> |
| 0007265 | Ras protein signal transduction                                                   | 6                     | 1588        | 4             | 1391        | 0.915        | 4                | 617        | 2          | 971        | 0.33         |
| 0009966 | regulation of signal transduction                                                 | 17                    | 1577        | 17            | 1378        | 0.827        | <b>13</b>        | <b>608</b> | <b>4</b>   | <b>969</b> | <b>0.003</b> |
| 0007275 | development                                                                       | 236                   | 1358        | 224           | 1171        | 0.371        | <b>128</b>       | <b>493</b> | <b>108</b> | <b>865</b> | <b>3E-07</b> |
| 0007568 | aging                                                                             | 6                     | 1588        | 5             | 1390        | 0.825        | 2                | 619        | 4          | 969        | 0.892        |
| 0030154 | cell differentiation                                                              | 60                    | 1534        | 59            | 1336        | 0.579        | <b>36</b>        | <b>585</b> | <b>24</b>  | <b>949</b> | <b>0.001</b> |
| 0048468 | cell development                                                                  | 35                    | 1559        | 40            | 1355        | 0.292        | 18               | 603        | 17         | 956        | 0.176        |
| 0000904 | cellular morphogenesis during differentiation                                     | 11                    | 1583        | 8             | 1387        | 0.865        | 6                | 615        | 5          | 968        | 0.451        |
| 0042461 | photoreceptor cell development                                                    | 11                    | 1583        | 7             | 1388        | 0.669        | 6                | 615        | 5          | 968        | 0.451        |
| 0042051 | eye photoreceptor development (sensu Endopterygota)                               | 10                    | 1584        | 7             | 1388        | 0.832        | 5                | 616        | 5          | 968        | 0.694        |
| 0045165 | cell fate commitment                                                              | 22                    | 1572        | 27            | 1368        | 0.294        | <b>14</b>        | <b>607</b> | <b>8</b>   | <b>965</b> | <b>0.03</b>  |

| GO#     | GO term                                                       | Representational bias |             |               |             |              | Directional bias |            |            |            |              |
|---------|---------------------------------------------------------------|-----------------------|-------------|---------------|-------------|--------------|------------------|------------|------------|------------|--------------|
|         |                                                               | regulated             |             | not regulated |             | $\rho$       | up-reg.          |            | down-reg.  |            | $\rho$       |
|         |                                                               | term                  | n.term      | term          | n.term      |              | term             | n.term     | term       | n.term     |              |
| 0001709 | cell fate determination                                       | 14                    | 1580        | 16            | 1379        | 0.581        | 7                | 614        | 7          | 966        | 0.565        |
| 0007400 | neuroblast cell fate determination                            | 2                     | 1592        | 6             | 1389        | 0.21         | 2                | 619        | 0          | 973        | 0.296        |
| 0001708 | cell fate specification                                       | 3                     | 1591        | 5             | 1390        | 0.587        | 2                | 619        | 1          | 972        | 0.695        |
| 0007349 | cellularization                                               | 7                     | 1587        | 4             | 1391        | 0.701        | 3                | 618        | 4          | 969        | 0.86         |
| 0040007 | growth                                                        | 22                    | 1572        | 14            | 1381        | 0.439        | 10               | 611        | 12         | 961        | 0.683        |
| 0002164 | larval development                                            | 10                    | 1584        | 7             | 1388        | 0.832        | 5                | 616        | 5          | 968        | 0.694        |
| 0002165 | larval or pupal development (sensu Insecta)                   | 75                    | 1519        | 54            | 1341        | 0.303        | <b>44</b>        | <b>577</b> | <b>31</b>  | <b>942</b> | <b>5E-04</b> |
| 0007552 | metamorphosis                                                 | 71                    | 1523        | 50            | 1345        | 0.267        | <b>42</b>        | <b>579</b> | <b>29</b>  | <b>944</b> | <b>6E-04</b> |
| 0009653 | morphogenesis                                                 | 157                   | 1437        | 162           | 1233        | 0.134        | <b>96</b>        | <b>525</b> | <b>61</b>  | <b>912</b> | <b>3E-09</b> |
| 0002009 | morphogenesis of an epithelium                                | 21                    | 1573        | 23            | 1372        | 0.55         | 11               | 610        | 10         | 963        | 0.296        |
| 0009887 | organogenesis                                                 | 135                   | 1459        | 147           | 1248        | 0.062        | <b>86</b>        | <b>535</b> | <b>49</b>  | <b>924</b> | <b>1E-09</b> |
| 0001654 | eye morphogenesis                                             | 27                    | 1567        | 30            | 1365        | 0.437        | <b>17</b>        | <b>604</b> | <b>10</b>  | <b>963</b> | <b>0.017</b> |
| 0008406 | gonad development                                             | 5                     | 1589        | 6             | 1389        | 0.825        | 4                | 617        | 1          | 972        | 0.154        |
| 0007444 | imaginal disc development                                     | 52                    | 1542        | 41            | 1354        | 0.688        | <b>36</b>        | <b>585</b> | <b>16</b>  | <b>957</b> | <b>1E-05</b> |
| 0007494 | midgut development                                            | 2                     | 1592        | 3             | 1392        | 0.881        | 1                | 620        | 1          | 972        | 0.685        |
| 0007517 | muscle development                                            | 16                    | 1578        | 18            | 1377        | 0.573        | <b>12</b>        | <b>609</b> | 4          | <b>969</b> | <b>0.007</b> |
| 0007399 | neurogenesis                                                  | 78                    | 1516        | 84            | 1311        | 0.201        | <b>54</b>        | <b>567</b> | <b>24</b>  | <b>949</b> | <b>4E-08</b> |
| 0007409 | axonogenesis                                                  | 28                    | 1566        | 15            | 1380        | 0.16         | <b>22</b>        | <b>599</b> | <b>6</b>   | <b>967</b> | <b>3E-05</b> |
| 0007411 | axon guidance                                                 | 22                    | 1572        | 11            | 1384        | 0.171        | <b>19</b>        | <b>602</b> | <b>3</b>   | <b>970</b> | <b>1E-05</b> |
| 0007417 | central nervous system development                            | 20                    | 1574        | 19            | 1376        | 0.923        | <b>16</b>        | <b>605</b> | <b>4</b>   | <b>969</b> | <b>4E-04</b> |
| 0016358 | dendrite morphogenesis                                        | 9                     | 1585        | 5             | 1390        | 0.579        | 5                | 616        | 4          | 969        | 0.496        |
| 0042063 | gliogenesis                                                   | 8                     | 1586        | 3             | 1392        | 0.323        | 4                | 617        | 4          | 969        | 0.781        |
| 0007422 | peripheral nervous system development                         | 23                    | 1571        | 17            | 1378        | 0.709        | <b>16</b>        | <b>605</b> | <b>7</b>   | <b>966</b> | <b>0.005</b> |
| 0050767 | regulation of neurogenesis                                    | 3                     | 1591        | 2             | 1393        | 0.881        | 2                | 619        | 1          | 972        | 0.695        |
| 0007424 | tracheal system development (sensu Insecta)                   | 17                    | 1577        | 20            | 1375        | 0.459        | 9                | 612        | 8          | 965        | 0.348        |
| 0048513 | organ development                                             | 138                   | 1456        | 148           | 1247        | 0.081        | <b>87</b>        | <b>534</b> | <b>51</b>  | <b>922</b> | <b>2E-09</b> |
| 0007389 | pattern specification                                         | 35                    | 1559        | 41            | 1354        | 0.241        | <b>26</b>        | <b>595</b> | <b>9</b>   | <b>964</b> | <b>3E-05</b> |
| 0048066 | pigmentation                                                  | 4                     | 1590        | 7             | 1388        | 0.408        | 2                | 619        | 2          | 971        | 0.952        |
| 0009791 | post-embryonic development                                    | 10                    | 1584        | 7             | 1388        | 0.832        | 5                | 616        | 5          | 968        | 0.694        |
| 0009790 | embryonic development                                         | <b>43</b>             | <b>1551</b> | <b>57</b>     | <b>1338</b> | <b>0.045</b> | <b>28</b>        | <b>593</b> | <b>15</b>  | <b>958</b> | <b>7E-04</b> |
| 0007530 | sex determination                                             | 4                     | 1590        | 6             | 1389        | 0.597        | 1                | 620        | 3          | 970        | 0.952        |
| 0007548 | sex differentiation                                           | 11                    | 1583        | 8             | 1387        | 0.865        | <b>8</b>         | <b>613</b> | <b>3</b>   | <b>970</b> | <b>0.046</b> |
| 0019827 | stem cell maintenance                                         | 3                     | 1591        | 5             | 1390        | 0.587        | 2                | 619        | 1          | 972        | 0.695        |
| 0000003 | reproduction                                                  | 71                    | 1523        | 73            | 1322        | 0.365        | <b>37</b>        | <b>584</b> | <b>34</b>  | <b>939</b> | <b>0.028</b> |
| 0050793 | regulation of development                                     | 22                    | 1572        | 21            | 1374        | 0.894        | 13               | 608        | 9          | 964        | 0.084        |
| 0007582 | physiological process                                         | <b>892</b>            | <b>702</b>  | <b>713</b>    | <b>682</b>  | <b>0.009</b> | 331              | 290        | 561        | 412        | 0.098        |
| 0008152 | metabolism                                                    | 642                   | 952         | 524           | 871         | 0.139        | <b>215</b>       | <b>406</b> | <b>427</b> | <b>546</b> | <b>3E-04</b> |
| 0009056 | catabolism                                                    | <b>127</b>            | <b>1467</b> | <b>82</b>     | <b>1313</b> | <b>0.031</b> | <b>35</b>        | <b>586</b> | <b>92</b>  | <b>881</b> | <b>0.008</b> |
| 0006091 | energy pathways                                               | <b>85</b>             | <b>1509</b> | <b>23</b>     | <b>1372</b> | <b>1E-07</b> | <b>15</b>        | <b>606</b> | <b>70</b>  | <b>903</b> | <b>6E-05</b> |
| 0006118 | electron transport                                            | <b>41</b>             | <b>1553</b> | <b>14</b>     | <b>1381</b> | <b>0.002</b> | <b>9</b>         | <b>612</b> | <b>32</b>  | <b>941</b> | <b>0.036</b> |
| 0006139 | nucleobase, nucleoside, nucleotide and nucleic acid metabolis | 218                   | 1376        | 214           | 1181        | 0.215        | 90               | 531        | 128        | 845        | 0.494        |
| 0006259 | DNA metabolism                                                | 36                    | 1558        | 43            | 1352        | 0.198        | 12               | 609        | 24         | 949        | 0.598        |
| 0006350 | transcription                                                 | <b>104</b>            | <b>1490</b> | <b>123</b>    | <b>1272</b> | <b>0.022</b> | <b>56</b>        | <b>565</b> | <b>48</b>  | <b>925</b> | <b>0.002</b> |
| 0043170 | macromolecule metabolism                                      | <b>368</b>            | <b>1226</b> | <b>260</b>    | <b>1135</b> | <b>0.003</b> | <b>111</b>       | <b>510</b> | <b>257</b> | <b>716</b> | <b>1E-04</b> |
| 0019538 | protein metabolism                                            | 297                   | 1297        | 230           | 1165        | 0.137        | <b>97</b>        | <b>524</b> | <b>200</b> | <b>773</b> | <b>0.016</b> |
| 0006412 | protein biosynthesis                                          | 69                    | 1525        | 41            | 1354        | 0.055        | <b>7</b>         | <b>614</b> | <b>62</b>  | <b>911</b> | <b>1E-06</b> |
| 0006464 | protein modification                                          | 142                   | 1452        | 114           | 1281        | 0.514        | 59               | 562        | 83         | 890        | 0.567        |
| 0006457 | protein folding                                               | 26                    | 1568        | 17            | 1378        | 0.429        | 11               | 610        | 15         | 958        | 0.88         |
| 0005975 | carbohydrate metabolism                                       | <b>73</b>             | <b>1521</b> | <b>34</b>     | <b>1361</b> | <b>0.002</b> | <b>15</b>        | <b>606</b> | <b>58</b>  | <b>915</b> | <b>0.001</b> |
| 0006519 | amino acid and derivative metabolism                          | 37                    | 1557        | 33            | 1362        | 0.967        | 13               | 608        | 24         | 949        | 0.755        |
| 0006629 | lipid metabolism                                              | 52                    | 1542        | 37            | 1358        | 0.384        | 14               | 607        | 38         | 935        | 0.096        |
| 0009308 | amine metabolism                                              | 44                    | 1550        | 37            | 1358        | 0.945        | 14               | 607        | 30         | 943        | 0.408        |
| 0042440 | pigment metabolism                                            | 6                     | 1588        | 6             | 1389        | 0.954        | 2                | 619        | 4          | 969        | 0.892        |
| 0042445 | hormone metabolism                                            | 4                     | 1590        | 3             | 1392        | 0.86         | 3                | 618        | 1          | 972        | 0.334        |
| 0009058 | biosynthesis                                                  | 120                   | 1474        | 84            | 1311        | 0.119        | <b>22</b>        | <b>599</b> | <b>98</b>  | <b>875</b> | <b>2E-06</b> |
| 0019748 | secondary metabolism                                          | 6                     | 1588        | 8             | 1387        | 0.604        | 2                | 619        | 4          | 969        | 0.892        |
| 0019222 | regulation of metabolism                                      | 116                   | 1478        | 122           | 1273        | 0.158        | <b>56</b>        | <b>565</b> | <b>60</b>  | <b>913</b> | <b>0.042</b> |
| 0016265 | death                                                         | 45                    | 1549        | 41            | 1354        | 0.937        | 24               | 597        | 21         | 952        | 0.064        |
| 0008219 | cell death                                                    | 38                    | 1556        | 36            | 1359        | 0.82         | 21               | 600        | 17         | 956        | 0.055        |
| 0016271 | tissue death                                                  | 18                    | 1576        | 9             | 1386        | 0.229        | 9                | 612        | 9          | 964        | 0.47         |
| 0042592 | homeostasis                                                   | 18                    | 1576        | 11            | 1384        | 0.447        | 7                | 614        | 11         | 962        | 0.813        |
| 0019725 | cell homeostasis                                              | 17                    | 1577        | 9             | 1386        | 0.298        | 6                | 615        | 11         | 962        | 0.951        |
| 0050801 | ion homeostasis                                               | 10                    | 1584        | 4             | 1391        | 0.275        | 4                | 617        | 6          | 967        | 0.797        |
| 0043062 | extracellular structure organization and biogenesis           | 8                     | 1586        | 11            | 1384        | 0.451        | 6                | 615        | 2          | 971        | 0.083        |
| 0046903 | secretion                                                     | 62                    | 1532        | 39            | 1356        | 0.121        | 26               | 595        | 36         | 937        | 0.721        |
| 0048511 | rhythmic process                                              | 9                     | 1585        | 8             | 1387        | 0.832        | <b>7</b>         | <b>614</b> | <b>2</b>   | <b>971</b> | <b>0.04</b>  |

| GO#     | GO term                                                       | Representational bias |             |               |             |              | Directional bias |            |            |            |              |
|---------|---------------------------------------------------------------|-----------------------|-------------|---------------|-------------|--------------|------------------|------------|------------|------------|--------------|
|         |                                                               | regulated             |             | not regulated |             | $\rho$       | up-reg.          |            | down-reg.  |            | $\rho$       |
|         |                                                               | term                  | n.term      | term          | n.term      |              | term             | n.term     | term       | n.term     |              |
| 0050791 | regulation of physiological process                           | 176                   | 1418        | 171           | 1224        | 0.328        | <b>88</b>        | <b>533</b> | <b>88</b>  | <b>885</b> | <b>0.002</b> |
| 0050874 | organismal physiological process                              | 127                   | 1467        | 105           | 1290        | 0.704        | <b>76</b>        | <b>545</b> | <b>51</b>  | <b>922</b> | <b>8E-07</b> |
| 0050875 | cellular physiological process                                | <b>849</b>            | <b>745</b>  | <b>670</b>    | <b>725</b>  | <b>0.005</b> | 314              | 307        | 535        | 438        | 0.094        |
| 0006810 | transport                                                     | <b>234</b>            | <b>1360</b> | <b>164</b>    | <b>1231</b> | <b>0.022</b> | 103              | 518        | 131        | 842        | 0.1          |
| 0006811 | ion transport                                                 | 71                    | 1523        | 49            | 1346        | 0.224        | 35               | 586        | 36         | 937        | 0.089        |
| 0006818 | hydrogen transport                                            | <b>17</b>             | <b>1577</b> | <b>1</b>      | <b>1394</b> | <b>0.001</b> | 3                | 618        | 14         | 959        | 0.118        |
| 0006836 | neurotransmitter transport                                    | 4                     | 1590        | 1             | 1394        | 0.455        | 3                | 618        | 1          | 972        | 0.334        |
| 0006858 | extracellular transport                                       | 10                    | 1584        | 5             | 1390        | 0.436        | 4                | 617        | 6          | 967        | 0.797        |
| 0006869 | lipid transport                                               | 12                    | 1582        | 4             | 1391        | 0.136        | 3                | 618        | 9          | 964        | 0.485        |
| 0008643 | carbohydrate transport                                        | 5                     | 1589        | 10            | 1385        | 0.195        | 1                | 620        | 4          | 969        | 0.681        |
| 0015031 | protein transport                                             | 105                   | 1489        | 75            | 1320        | 0.19         | 39               | 582        | 66         | 907        | 0.771        |
| 0015837 | amine transport                                               | 10                    | 1584        | 2             | 1393        | 0.072        | 7                | 614        | 3          | 970        | 0.09         |
| 0015931 | nucleobase, nucleoside, nucleotide and nucleic acid transport | 8                     | 1586        | 5             | 1390        | 0.752        | 1                | 620        | 7          | 966        | 0.24         |
| 0016192 | vesicle-mediated transport                                    | 72                    | 1522        | 47            | 1348        | 0.132        | 32               | 589        | 40         | 933        | 0.394        |
| 0045045 | secretory pathway                                             | 59                    | 1535        | 36            | 1359        | 0.101        | 25               | 596        | 34         | 939        | 0.68         |
| 0046907 | intracellular transport                                       | 117                   | 1477        | 81            | 1314        | 0.108        | 42               | 579        | 75         | 898        | 0.544        |
| 0051049 | regulation of transport                                       | 13                    | 1581        | 5             | 1390        | 0.169        | 7                | 614        | 6          | 967        | 0.412        |
| 0008283 | cell proliferation                                            | 42                    | 1552        | 29            | 1366        | 0.381        | <b>23</b>        | <b>598</b> | <b>19</b>  | <b>954</b> | <b>0.049</b> |
| 0007049 | cell cycle                                                    | 78                    | 1516        | 50            | 1345        | 0.094        | 30               | 591        | 48         | 925        | 0.979        |
| 0017145 | stem cell division                                            | <b>2</b>              | <b>1592</b> | <b>10</b>     | <b>1385</b> | <b>0.024</b> | 1                | 620        | 1          | 972        | 0.685        |
| 0016043 | cell organization and biogenesis                              | 139                   | 1455        | 136           | 1259        | 0.364        | <b>70</b>        | <b>551</b> | <b>69</b>  | <b>904</b> | <b>0.005</b> |
| 0000902 | cellular morphogenesis                                        | 40                    | 1554        | 40            | 1355        | 0.623        | <b>25</b>        | <b>596</b> | <b>15</b>  | <b>958</b> | <b>0.003</b> |
| 0006996 | organelle organization and biogenesis                         | 119                   | 1475        | 119           | 1276        | 0.315        | <b>59</b>        | <b>562</b> | <b>60</b>  | <b>913</b> | <b>0.018</b> |
| 0007010 | cytoskeleton organization and biogenesis                      | 93                    | 1501        | 77            | 1318        | 0.771        | <b>51</b>        | <b>570</b> | <b>42</b>  | <b>931</b> | <b>0.002</b> |
| 0006997 | nuclear organization and biogenesis                           | 6                     | 1588        | 4             | 1391        | 0.915        | 2                | 619        | 4          | 969        | 0.892        |
| 0007028 | cytoplasm organization and biogenesis                         | <b>5</b>              | <b>1589</b> | <b>14</b>     | <b>1381</b> | <b>0.033</b> | 4                | 617        | 1          | 972        | 0.154        |
| 0016044 | membrane organization and biogenesis                          | 6                     | 1588        | 3             | 1392        | 0.639        | 2                | 619        | 4          | 969        | 0.892        |
| 0051128 | regulation of cell organization and biogenesis                | 6                     | 1588        | 5             | 1390        | 0.825        | 3                | 618        | 3          | 970        | 0.892        |
| 0016049 | cell growth                                                   | 4                     | 1590        | 5             | 1390        | 0.841        | 2                | 619        | 2          | 971        | 0.952        |
| 0050896 | response to stimulus                                          | 99                    | 1495        | 82            | 1313        | 0.761        | <b>59</b>        | <b>562</b> | <b>40</b>  | <b>933</b> | <b>2E-05</b> |
| 0006950 | response to stress                                            | 32                    | 1562        | 27            | 1368        | 0.992        | 16               | 605        | 16         | 957        | 0.267        |
| 0009408 | response to heat                                              | 3                     | 1591        | 7             | 1388        | 0.245        | 3                | 618        | 0          | 973        | 0.115        |
| 0006979 | response to oxidative stress                                  | 1                     | 1593        | 1             | 1394        | 0.539        | 1                | 620        | 0          | 973        | 0.821        |
| 0051179 | localization                                                  | 247                   | 1347        | 182           | 1213        | 0.064        | 110              | 511        | 137        | 836        | 0.06         |
| 0006403 | RNA localization                                              | 18                    | 1576        | 14            | 1381        | 0.877        | 7                | 614        | 11         | 962        | 0.813        |
| 0008104 | protein localization                                          | 110                   | 1484        | 85            | 1310        | 0.413        | 41               | 580        | 69         | 904        | 0.784        |
| 0051234 | establishment of localization                                 | <b>236</b>            | <b>1358</b> | <b>167</b>    | <b>1228</b> | <b>0.027</b> | 104              | 517        | 132        | 841        | 0.095        |
| 0051235 | maintenance of localization                                   | 2                     | 1592        | 2             | 1393        | 0.713        | 2                | 619        | 0          | 973        | 0.296        |
| 0050789 | regulation of biological process                              | 203                   | 1391        | 200           | 1195        | 0.22         | <b>102</b>       | <b>519</b> | <b>101</b> | <b>872</b> | <b>6E-04</b> |
| 0050790 | regulation of enzyme activity                                 | 6                     | 1588        | 8             | 1387        | 0.604        | 3                | 618        | 3          | 970        | 0.892        |
| 0040029 | regulation of gene expression, epigenetic                     | 8                     | 1586        | 12            | 1383        | 0.33         | 2                | 619        | 6          | 967        | 0.654        |
| 0006306 | DNA methylation                                               | 3                     | 1591        | 4             | 1391        | 0.86         | 0                | 621        | 3          | 970        | 0.428        |
| 0045814 | negative regulation of gene expression, epigenetic            | 3                     | 1591        | 4             | 1391        | 0.86         | 1                | 620        | 2          | 971        | 0.695        |
| 0006342 | chromatin silencing                                           | 3                     | 1591        | 4             | 1391        | 0.86         | 1                | 620        | 2          | 971        | 0.695        |
| 0003674 | molecular_function                                            | <b>970</b>            | <b>624</b>  | <b>762</b>    | <b>633</b>  | <b>7E-04</b> | 374              | 247        | 596        | 377        | 0.721        |
| 0016209 | antioxidant activity                                          | 8                     | 1586        | 1             | 1394        | 0.071        | 0                | 621        | 8          | 965        | 0.057        |
| 0005488 | binding                                                       | 555                   | 1039        | 452           | 943         | 0.175        | 230              | 391        | 325        | 648        | 0.152        |
| 0005509 | calcium ion binding                                           | 32                    | 1562        | 29            | 1366        | 0.994        | 14               | 607        | 18         | 955        | 0.705        |
| 0030246 | carbohydrate binding                                          | 6                     | 1588        | 9             | 1386        | 0.437        | 0                | 621        | 6          | 967        | 0.123        |
| 0008289 | lipid binding                                                 | 12                    | 1582        | 14            | 1381        | 0.59         | 5                | 616        | 7          | 966        | 0.917        |
| 0003676 | nucleic acid binding                                          | 211                   | 1383        | 178           | 1217        | 0.74         | 80               | 541        | 131        | 842        | 0.796        |
| 0003677 | DNA binding                                                   | <b>88</b>             | <b>1506</b> | <b>106</b>    | <b>1289</b> | <b>0.026</b> | <b>49</b>        | <b>572</b> | <b>39</b>  | <b>934</b> | <b>0.001</b> |
| 0003682 | chromatin binding                                             | 8                     | 1586        | 15            | 1380        | 0.114        | 5                | 616        | 3          | 970        | 0.315        |
| 0003700 | transcription factor activity                                 | <b>33</b>             | <b>1561</b> | <b>53</b>     | <b>1342</b> | <b>0.007</b> | <b>21</b>        | <b>600</b> | <b>12</b>  | <b>961</b> | <b>0.006</b> |
| 0003723 | RNA binding                                                   | <b>79</b>             | <b>1515</b> | <b>40</b>     | <b>1355</b> | <b>0.005</b> | <b>21</b>        | <b>600</b> | <b>58</b>  | <b>915</b> | <b>0.028</b> |
| 0008135 | translation factor activity, nucleic acid binding             | <b>26</b>             | <b>1568</b> | <b>9</b>      | <b>1386</b> | <b>0.02</b>  | <b>2</b>         | <b>619</b> | <b>24</b>  | <b>949</b> | <b>0.002</b> |
| 0000166 | nucleotide binding                                            | 149                   | 1445        | 106           | 1289        | 0.101        | 59               | 562        | 90         | 883        | 0.936        |
| 0005515 | protein binding                                               | 200                   | 1394        | 179           | 1216        | 0.859        | <b>110</b>       | <b>511</b> | <b>90</b>  | <b>883</b> | <b>1E-06</b> |
| 0008134 | transcription factor binding                                  | 16                    | 1578        | 15            | 1380        | 0.991        | 10               | 611        | 6          | 967        | 0.092        |
| 0008092 | cytoskeletal protein binding                                  | 48                    | 1546        | 40            | 1355        | 0.902        | 22               | 599        | 26         | 947        | 0.4          |
| 0003779 | actin binding                                                 | 24                    | 1570        | 29            | 1366        | 0.296        | 9                | 612        | 15         | 958        | 0.95         |
| 0003824 | catalytic activity                                            | <b>484</b>            | <b>1110</b> | <b>355</b>    | <b>1040</b> | <b>0.003</b> | <b>145</b>       | <b>476</b> | <b>339</b> | <b>634</b> | <b>2E-06</b> |
| 0016787 | hydrolase activity                                            | 207                   | 1387        | 165           | 1230        | 0.367        | <b>66</b>        | <b>555</b> | <b>141</b> | <b>832</b> | <b>0.031</b> |
| 0003924 | GTPase activity                                               | 25                    | 1569        | 15            | 1380        | 0.312        | 8                | 613        | 17         | 956        | 0.608        |
| 0004518 | nuclease activity                                             | 10                    | 1584        | 5             | 1390        | 0.436        | 2                | 619        | 8          | 965        | 0.364        |

## PC5

| GO#     | GO term                                    | Representational bias |             |               |             |              | Directional bias |            |            |            |              |
|---------|--------------------------------------------|-----------------------|-------------|---------------|-------------|--------------|------------------|------------|------------|------------|--------------|
|         |                                            | regulated             |             | not regulated |             | $\rho$       | up-reg.          |            | down-reg.  |            | $\rho$       |
|         |                                            | term                  | n.term      | term          | n.term      |              | term             | n.term     | term       | n.term     |              |
| 0008233 | peptidase activity                         | 67                    | 1527        | 51            | 1344        | 0.501        | <b>17</b>        | <b>604</b> | <b>50</b>  | <b>923</b> | <b>0.028</b> |
| 0004721 | phosphoprotein phosphatase activity        | 16                    | 1578        | 14            | 1381        | 0.854        | 8                | 613        | 8          | 965        | 0.514        |
| 0016740 | transferase activity                       | 126                   | 1468        | 115           | 1280        | 0.785        | 51               | 570        | 75         | 898        | 0.788        |
| 0016301 | kinase activity                            | 77                    | 1517        | 58            | 1337        | 0.426        | <b>40</b>        | <b>581</b> | <b>37</b>  | <b>936</b> | <b>0.023</b> |
| 0004672 | protein kinase activity                    | 51                    | 1543        | 44            | 1351        | 0.973        | <b>33</b>        | <b>588</b> | <b>18</b>  | <b>955</b> | <b>2E-04</b> |
| 0030234 | enzyme regulator activity                  | 59                    | 1535        | 46            | 1349        | 0.618        | 30               | 591        | 29         | 944        | 0.076        |
| 0003774 | motor activity                             | 16                    | 1578        | 12            | 1383        | 0.829        | 8                | 613        | 8          | 965        | 0.514        |
| 0004871 | signal transducer activity                 | 132                   | 1462        | 124           | 1271        | 0.598        | <b>88</b>        | <b>533</b> | <b>44</b>  | <b>929</b> | <b>2E-11</b> |
| 0004872 | receptor activity                          | 58                    | 1536        | 51            | 1344        | 0.942        | <b>41</b>        | <b>580</b> | <b>17</b>  | <b>956</b> | <b>9E-07</b> |
| 0004879 | ligand-dependent nuclear receptor activity | 6                     | 1588        | 3             | 1392        | 0.639        | 5                | 616        | 1          | 972        | 0.07         |
| 0004888 | transmembrane receptor activity            | 36                    | 1558        | 38            | 1357        | 0.484        | <b>26</b>        | <b>595</b> | <b>10</b>  | <b>963</b> | <b>7E-05</b> |
| 0004930 | G-protein coupled receptor activity        | 13                    | 1581        | 17            | 1378        | 0.358        | <b>10</b>        | <b>611</b> | <b>3</b>   | <b>970</b> | <b>0.011</b> |
| 0005057 | receptor signaling protein activity        | 45                    | 1549        | 35            | 1360        | 0.676        | <b>31</b>        | <b>590</b> | <b>14</b>  | <b>959</b> | <b>6E-05</b> |
| 0005102 | receptor binding                           | 29                    | 1565        | 40            | 1355        | 0.075        | <b>20</b>        | <b>601</b> | <b>9</b>   | <b>964</b> | <b>0.002</b> |
| 0005198 | structural molecule activity               | 83                    | 1511        | 79            | 1316        | 0.639        | 31               | 590        | 52         | 921        | 0.847        |
| 0030528 | transcription regulator activity           | <b>87</b>             | <b>1507</b> | <b>112</b>    | <b>1283</b> | <b>0.006</b> | <b>50</b>        | <b>571</b> | <b>37</b>  | <b>936</b> | <b>4E-04</b> |
| 0045182 | translation regulator activity             | <b>26</b>             | <b>1568</b> | <b>9</b>      | <b>1386</b> | <b>0.02</b>  | <b>2</b>         | <b>619</b> | <b>24</b>  | <b>949</b> | <b>0.002</b> |
| 0005215 | transporter activity                       | <b>152</b>            | <b>1442</b> | <b>101</b>    | <b>1294</b> | <b>0.029</b> | 62               | 559        | 90         | 883        | 0.69         |
| 0005489 | electron transporter activity              | <b>23</b>             | <b>1571</b> | <b>6</b>      | <b>1389</b> | <b>0.009</b> | 6                | 615        | 17         | 956        | 0.289        |
| 0005216 | ion channel activity                       | 28                    | 1566        | 24            | 1371        | 0.948        | <b>21</b>        | <b>600</b> | <b>7</b>   | <b>966</b> | <b>2E-04</b> |
| 0005244 | voltage-gated ion channel activity         | 15                    | 1579        | 11            | 1384        | 0.802        | <b>12</b>        | <b>609</b> | <b>3</b>   | <b>970</b> | <b>0.003</b> |
| 0005575 | cellular_component                         | <b>692</b>            | <b>902</b>  | <b>531</b>    | <b>864</b>  | <b>0.003</b> | <b>250</b>       | <b>371</b> | <b>442</b> | <b>531</b> | <b>0.048</b> |
| 0005623 | cell                                       | <b>629</b>            | <b>965</b>  | <b>483</b>    | <b>912</b>  | <b>0.007</b> | 228              | 393        | 401        | 572        | 0.082        |
| 0005622 | intracellular                              | <b>495</b>            | <b>1099</b> | <b>362</b>    | <b>1033</b> | <b>0.002</b> | <b>150</b>       | <b>471</b> | <b>345</b> | <b>628</b> | <b>3E-06</b> |
| 0005737 | cytoplasm                                  | <b>301</b>            | <b>1293</b> | <b>157</b>    | <b>1238</b> | <b>1E-08</b> | <b>60</b>        | <b>561</b> | <b>241</b> | <b>732</b> | <b>9E-14</b> |
| 0016023 | cytoplasmic vesicle                        | 24                    | 1570        | 17            | 1378        | 0.606        | 12               | 609        | 12         | 961        | 0.365        |
| 0005829 | cytosol                                    | <b>54</b>             | <b>1540</b> | <b>25</b>     | <b>1370</b> | <b>0.009</b> | <b>3</b>         | <b>618</b> | <b>51</b>  | <b>922</b> | <b>6E-07</b> |
| 0005783 | endoplasmic reticulum                      | 37                    | 1557        | 20            | 1375        | 0.102        | <b>2</b>         | <b>619</b> | <b>35</b>  | <b>938</b> | <b>5E-05</b> |
| 0005794 | Golgi apparatus                            | 12                    | 1582        | 13            | 1382        | 0.738        | 2                | 619        | 10         | 963        | 0.196        |
| 0005815 | microtubule organizing center              | 8                     | 1586        | 1             | 1394        | 0.071        | 4                | 617        | 4          | 969        | 0.781        |
| 0005739 | mitochondrion                              | <b>83</b>             | <b>1511</b> | <b>22</b>     | <b>1373</b> | <b>1E-07</b> | <b>5</b>         | <b>616</b> | <b>78</b>  | <b>895</b> | <b>6E-10</b> |
| 0005840 | ribosome                                   | 18                    | 1576        | 6             | 1389        | 0.053        | 1                | 620        | 17         | 956        | 0.007        |
| 0005773 | vacuole                                    | <b>13</b>             | <b>1581</b> | <b>1</b>      | <b>1394</b> | <b>0.007</b> | <b>0</b>         | <b>621</b> | <b>13</b>  | <b>960</b> | <b>0.009</b> |
| 0005764 | lysosome                                   | 5                     | 1589        | 0             | 1395        | 0.1          | 0                | 621        | 5          | 968        | 0.184        |
| 0005856 | cytoskeleton                               | 51                    | 1543        | 34            | 1361        | 0.254        | 24               | 597        | 27         | 946        | 0.289        |
| 0005694 | chromosome                                 | 18                    | 1576        | 22            | 1373        | 0.366        | 10               | 611        | 8          | 965        | 0.227        |
| 0000228 | nuclear chromosome                         | 3                     | 1591        | 2             | 1393        | 0.881        | 0                | 621        | 3          | 970        | 0.428        |
| 0005634 | nucleus                                    | 184                   | 1410        | 188           | 1207        | 0.123        | 78               | 543        | 106        | 867        | 0.35         |
| 0005635 | nuclear membrane                           | 6                     | 1588        | 11            | 1384        | 0.211        | 3                | 618        | 3          | 970        | 0.892        |
| 0005730 | nucleolus                                  | 6                     | 1588        | 5             | 1390        | 0.825        | 1                | 620        | 5          | 968        | 0.482        |
| 0005654 | nucleoplasm                                | 33                    | 1561        | 39            | 1356        | 0.242        | 13               | 608        | 20         | 953        | 0.898        |
| 0005777 | peroxisome                                 | 8                     | 1586        | 1             | 1394        | 0.071        | 0                | 621        | 8          | 965        | 0.057        |
| 0005886 | plasma membrane                            | 83                    | 1511        | 73            | 1322        | 0.96         | <b>56</b>        | <b>565</b> | <b>27</b>  | <b>946</b> | <b>9E-08</b> |
| 0005576 | extracellular region                       | 42                    | 1552        | 34            | 1361        | 0.821        | 22               | 599        | 20         | 953        | 0.099        |
| 0005578 | extracellular matrix (sensu Metazoa)       | 18                    | 1576        | 17            | 1378        | 0.955        | 10               | 611        | 8          | 965        | 0.227        |

| GO#     | GO term                                                                           | Representational bias |             |               |             |              | Directional bias |            |            |            |              |
|---------|-----------------------------------------------------------------------------------|-----------------------|-------------|---------------|-------------|--------------|------------------|------------|------------|------------|--------------|
|         |                                                                                   | regulated             |             | not regulated |             | $\rho$       | up-reg.          |            | down-reg.  |            | $\rho$       |
|         |                                                                                   | term                  | n.term      | term          | n.term      |              | term             | n.term     | term       | n.term     |              |
| 0008150 | biological_process                                                                | <b>927</b>            | <b>588</b>  | <b>827</b>    | <b>647</b>  | <b>0.005</b> | 615              | 373        | 312        | 215        | 0.27         |
| 0007610 | behavior                                                                          | 82                    | 1433        | 80            | 1394        | 0.95         | <b>37</b>        | <b>951</b> | <b>45</b>  | <b>482</b> | <b>1E-04</b> |
| 0030534 | adult behavior                                                                    | 12                    | 1503        | 12            | 1462        | 0.891        | 5                | 983        | 7          | 520        | 0.157        |
| 0030537 | larval behavior                                                                   | 4                     | 1511        | 5             | 1469        | 0.967        | 3                | 985        | 1          | 526        | 0.909        |
| 0007611 | learning and/or memory                                                            | 12                    | 1503        | 12            | 1462        | 0.891        | <b>4</b>         | <b>984</b> | <b>8</b>   | <b>519</b> | <b>0.043</b> |
| 0007612 | learning                                                                          | 5                     | 1510        | 10            | 1464        | 0.276        | 3                | 985        | 2          | 525        | 0.822        |
| 0007613 | memory                                                                            | 5                     | 1510        | 6             | 1468        | 0.964        | 1                | 987        | 4          | 523        | 0.098        |
| 0007626 | locomotory behavior                                                               | 63                    | 1452        | 60            | 1414        | 0.977        | <b>28</b>        | <b>960</b> | <b>35</b>  | <b>492</b> | <b>7E-04</b> |
| 0007635 | chemosensory behavior                                                             | 6                     | 1509        | 12            | 1462        | 0.215        | 2                | 986        | 4          | 523        | 0.225        |
| 0007622 | rhythmic behavior                                                                 | 7                     | 1508        | 8             | 1466        | 0.958        | 5                | 983        | 2          | 525        | 0.959        |
| 0048512 | circadian behavior                                                                | 7                     | 1508        | 7             | 1467        | 0.829        | 5                | 983        | 2          | 525        | 0.959        |
| 0009987 | cellular process                                                                  | <b>872</b>            | <b>643</b>  | <b>756</b>    | <b>718</b>  | <b>7E-04</b> | 580              | 408        | 292        | 235        | 0.237        |
| 0007154 | cell communication                                                                | 253                   | 1262        | 236           | 1238        | 0.646        | <b>136</b>       | <b>852</b> | <b>117</b> | <b>410</b> | <b>4E-05</b> |
| 0007155 | cell adhesion                                                                     | 37                    | 1478        | 53            | 1421        | 0.082        | <b>17</b>        | <b>971</b> | <b>20</b>  | <b>507</b> | <b>0.021</b> |
| 0008037 | cell recognition                                                                  | 0                     | 1515        | 2             | 1472        | 0.467        | 0                | 988        | 0          | 527        | -            |
| 0008038 | neuronal cell recognition                                                         | 0                     | 1515        | 2             | 1472        | 0.467        | 0                | 988        | 0          | 527        | -            |
| 0016337 | cell-cell adhesion                                                                | <b>12</b>             | <b>1503</b> | <b>27</b>     | <b>1447</b> | <b>0.019</b> | 5                | 983        | 7          | 520        | 0.157        |
| 0016339 | calcium-dependent cell-cell adhesion                                              | 2                     | 1513        | 5             | 1469        | 0.428        | 0                | 988        | 2          | 525        | 0.232        |
| 0007156 | homophilic cell adhesion                                                          | 3                     | 1512        | 6             | 1468        | 0.478        | 0                | 988        | 3          | 524        | 0.077        |
| 0007160 | cell-matrix adhesion                                                              | 2                     | 1513        | 7             | 1467        | 0.169        | 1                | 987        | 1          | 526        | 0.771        |
| 0007267 | cell-cell signaling                                                               | 88                    | 1427        | 68            | 1406        | 0.166        | <b>44</b>        | <b>944</b> | <b>44</b>  | <b>483</b> | <b>0.003</b> |
| 0019226 | transmission of nerve impulse                                                     | 79                    | 1436        | 59            | 1415        | 0.136        | <b>39</b>        | <b>949</b> | <b>40</b>  | <b>487</b> | <b>0.004</b> |
| 0007268 | synaptic transmission                                                             | 58                    | 1457        | 43            | 1431        | 0.202        | 31               | 957        | 27         | 500        | 0.075        |
| 0007270 | nerve-nerve synaptic transmission                                                 | 10                    | 1505        | 6             | 1468        | 0.486        | 5                | 983        | 5          | 522        | 0.496        |
| 0001505 | regulation of neurotransmitter levels                                             | 33                    | 1482        | 27            | 1447        | 0.586        | 20               | 968        | 13         | 514        | 0.706        |
| 0042133 | neurotransmitter metabolism                                                       | 3                     | 1512        | 5             | 1469        | 0.694        | 2                | 986        | 1          | 526        | 0.58         |
| 0007269 | neurotransmitter secretion                                                        | 30                    | 1485        | 23            | 1451        | 0.465        | 18               | 970        | 12         | 515        | 0.68         |
| 0007165 | signal transduction                                                               | 194                   | 1321        | 185           | 1289        | 0.878        | <b>108</b>       | <b>880</b> | <b>86</b>  | <b>441</b> | <b>0.004</b> |
| 0007166 | cell surface receptor linked signal transduction                                  | 86                    | 1429        | 71            | 1403        | 0.331        | 50               | 938        | 36         | 491        | 0.193        |
| 0007167 | enzyme linked receptor protein signaling pathway                                  | 25                    | 1490        | 21            | 1453        | 0.725        | <b>10</b>        | <b>978</b> | <b>15</b>  | <b>512</b> | <b>0.014</b> |
| 0007178 | transmembrane receptor protein serine/threonine kinase signaling pathway          | 10                    | 1505        | 6             | 1468        | 0.486        | 4                | 984        | 6          | 521        | 0.178        |
| 0007179 | transforming growth factor beta receptor signaling pathway                        | <b>8</b>              | <b>1507</b> | <b>1</b>      | <b>1473</b> | <b>0.05</b>  | 4                | 984        | 4          | 523        | 0.594        |
| 0007169 | transmembrane receptor protein tyrosine kinase signaling pathway                  | 15                    | 1500        | 17            | 1457        | 0.798        | 6                | 982        | 9          | 518        | 0.074        |
| 0007173 | epidermal growth factor receptor signaling pathway                                | 2                     | 1513        | 6             | 1468        | 0.271        | 0                | 988        | 2          | 525        | 0.232        |
| 0008286 | insulin receptor signaling pathway                                                | 2                     | 1513        | 2             | 1472        | 0.636        | 0                | 988        | 2          | 525        | 0.232        |
| 0008293 | torso signaling pathway                                                           | 2                     | 1513        | 5             | 1469        | 0.428        | 1                | 987        | 1          | 526        | 0.771        |
| 0007186 | G-protein coupled receptor protein signaling pathway                              | 41                    | 1474        | 30            | 1444        | 0.278        | 25               | 963        | 16         | 511        | 0.681        |
| 0007200 | G-protein signaling, coupled to IP3 second messenger (phospholipase C activating) | 3                     | 1512        | 2             | 1472        | 0.976        | 2                | 986        | 1          | 526        | 0.58         |
| 0007219 | Notch signaling pathway                                                           | 6                     | 1509        | 7             | 1467        | 0.96         | 4                | 984        | 2          | 525        | 0.723        |
| 0007224 | smoothened signaling pathway                                                      | 3                     | 1512        | 3             | 1471        | 0.708        | 2                | 986        | 1          | 526        | 0.58         |
| 0008063 | Toll signaling pathway                                                            | 3                     | 1512        | 1             | 1473        | 0.636        | 2                | 986        | 1          | 526        | 0.58         |
| 0016055 | Wnt receptor signaling pathway                                                    | 8                     | 1507        | 8             | 1466        | 0.845        | 6                | 982        | 2          | 525        | 0.833        |
| 0007242 | intracellular signaling cascade                                                   | 96                    | 1419        | 86            | 1388        | 0.619        | 57               | 931        | 39         | 488        | 0.258        |
| 0007263 | nitric oxide mediated signal transduction                                         | 2                     | 1513        | 2             | 1472        | 0.636        | 1                | 987        | 1          | 526        | 0.771        |
| 0007243 | protein kinase cascade                                                            | 23                    | 1492        | 18            | 1456        | 0.589        | 14               | 974        | 9          | 518        | 0.826        |
| 0007259 | JAK-STAT cascade                                                                  | 1                     | 1514        | 5             | 1469        | 0.208        | 1                | 987        | 0          | 527        | 0.749        |
| 0000165 | MAPKKK cascade                                                                    | 21                    | 1494        | 12            | 1462        | 0.186        | 12               | 976        | 9          | 518        | 0.581        |
| 0019932 | second-messenger-mediated signaling                                               | 11                    | 1504        | 11            | 1463        | 0.881        | 4                | 984        | 7          | 520        | 0.089        |
| 0019722 | calcium-mediated signaling                                                        | 7                     | 1508        | 8             | 1466        | 0.958        | 2                | 986        | 5          | 522        | 0.1          |
| 0048015 | phosphoinositide-mediated signaling                                               | 3                     | 1512        | 2             | 1472        | 0.976        | 2                | 986        | 1          | 526        | 0.58         |
| 0007264 | small GTPase mediated signal transduction                                         | 22                    | 1493        | 22            | 1452        | 0.952        | 12               | 976        | 10         | 517        | 0.405        |
| 0007265 | Ras protein signal transduction                                                   | 5                     | 1510        | 5             | 1469        | 0.785        | 1                | 987        | 4          | 523        | 0.098        |
| 0009966 | regulation of signal transduction                                                 | 15                    | 1500        | 19            | 1455        | 0.55         | 8                | 980        | 7          | 520        | 0.485        |
| 0007275 | development                                                                       | 239                   | 1276        | 221           | 1253        | 0.588        | <b>130</b>       | <b>858</b> | <b>109</b> | <b>418</b> | <b>2E-04</b> |
| 0007568 | aging                                                                             | 7                     | 1508        | 4             | 1470        | 0.576        | 6                | 982        | 1          | 526        | 0.457        |
| 0030154 | cell differentiation                                                              | 56                    | 1459        | 63            | 1411        | 0.475        | 31               | 957        | 25         | 502        | 0.151        |
| 0048468 | cell development                                                                  | 32                    | 1483        | 43            | 1431        | 0.197        | 22               | 966        | 10         | 517        | 0.813        |
| 0000904 | cellular morphogenesis during differentiation                                     | 7                     | 1508        | 12            | 1462        | 0.327        | 5                | 983        | 2          | 525        | 0.959        |
| 0042461 | photoreceptor cell development                                                    | 7                     | 1508        | 11            | 1463        | 0.443        | 5                | 983        | 2          | 525        | 0.959        |
| 0042051 | eye photoreceptor development (sensu Endopterygota)                               | 6                     | 1509        | 11            | 1463        | 0.303        | 5                | 983        | 1          | 526        | 0.614        |
| 0045165 | cell fate commitment                                                              | 23                    | 1492        | 26            | 1448        | 0.7          | 12               | 976        | 11         | 516        | 0.27         |

| GO#     | GO term                                                        | Representational bias |             |               |             |              | Directional bias |            |            |            |              |
|---------|----------------------------------------------------------------|-----------------------|-------------|---------------|-------------|--------------|------------------|------------|------------|------------|--------------|
|         |                                                                | regulated             |             | not regulated |             | $\rho$       | up-reg.          |            | down-reg.  |            | $\rho$       |
|         |                                                                | term                  | n.term      | term          | n.term      |              | term             | n.term     | term       | n.term     |              |
| 0001709 | cell fate determination                                        | 12                    | 1503        | 18            | 1456        | 0.321        | 6                | 982        | 6          | 521        | 0.42         |
| 0007400 | neuroblast cell fate determination                             | 5                     | 1510        | 3             | 1471        | 0.753        | 2                | 986        | 3          | 524        | 0.474        |
| 0001708 | cell fate specification                                        | 3                     | 1512        | 5             | 1469        | 0.694        | 1                | 987        | 2          | 525        | 0.58         |
| 0007349 | cellularization                                                | 9                     | 1506        | 2             | 1472        | 0.077        | 5                | 983        | 4          | 523        | 0.795        |
| 0040007 | growth                                                         | 20                    | 1495        | 16            | 1458        | 0.674        | <b>8</b>         | <b>980</b> | <b>12</b>  | <b>515</b> | <b>0.032</b> |
| 0002164 | larval development                                             | 10                    | 1505        | 7             | 1467        | 0.667        | 6                | 982        | 4          | 523        | 0.989        |
| 0002165 | larval or pupal development (sensu Insecta)                    | 65                    | 1450        | 64            | 1410        | 0.983        | <b>34</b>        | <b>954</b> | <b>31</b>  | <b>496</b> | <b>0.036</b> |
| 0007552 | metamorphosis                                                  | 60                    | 1455        | 61            | 1413        | 0.878        | <b>30</b>        | <b>958</b> | <b>30</b>  | <b>497</b> | <b>0.017</b> |
| 0009653 | morphogenesis                                                  | 160                   | 1355        | 159           | 1315        | 0.888        | <b>80</b>        | <b>908</b> | <b>80</b>  | <b>447</b> | <b>3E-05</b> |
| 0002009 | morphogenesis of an epithelium                                 | 22                    | 1493        | 22            | 1452        | 0.952        | 11               | 977        | 11         | 516        | 0.199        |
| 0009887 | organogenesis                                                  | 138                   | 1377        | 144           | 1330        | 0.579        | <b>70</b>        | <b>918</b> | <b>68</b>  | <b>459</b> | <b>3E-04</b> |
| 0001654 | eye morphogenesis                                              | 26                    | 1489        | 31            | 1443        | 0.522        | 14               | 974        | 12         | 515        | 0.308        |
| 0008406 | gonad development                                              | 7                     | 1508        | 4             | 1470        | 0.576        | 3                | 985        | 4          | 523        | 0.397        |
| 0007444 | imaginal disc development                                      | 39                    | 1476        | 54            | 1420        | 0.108        | <b>18</b>        | <b>970</b> | <b>21</b>  | <b>506</b> | <b>0.018</b> |
| 0007494 | midgut development                                             | 3                     | 1512        | 2             | 1472        | 0.976        | 1                | 987        | 2          | 525        | 0.58         |
| 0007517 | muscle development                                             | 17                    | 1498        | 17            | 1457        | 0.927        | 9                | 979        | 8          | 519        | 0.417        |
| 0007399 | neurogenesis                                                   | 87                    | 1428        | 75            | 1399        | 0.478        | <b>44</b>        | <b>944</b> | <b>43</b>  | <b>484</b> | <b>0.005</b> |
| 0007409 | axonogenesis                                                   | 27                    | 1488        | 16            | 1458        | 0.148        | <b>11</b>        | <b>977</b> | <b>16</b>  | <b>511</b> | <b>0.013</b> |
| 0007411 | axon guidance                                                  | 21                    | 1494        | 12            | 1462        | 0.186        | 9                | 979        | 12         | 515        | 0.053        |
| 0007417 | central nervous system development                             | 19                    | 1496        | 20            | 1454        | 0.931        | 9                | 979        | 10         | 517        | 0.161        |
| 0016358 | dendrite morphogenesis                                         | 9                     | 1506        | 5             | 1469        | 0.452        | 3                | 985        | 6          | 521        | 0.096        |
| 0042063 | gliogenesis                                                    | 5                     | 1510        | 6             | 1468        | 0.964        | 3                | 985        | 2          | 525        | 0.822        |
| 0007422 | peripheral nervous system development                          | 16                    | 1499        | 24            | 1450        | 0.229        | 8                | 980        | 8          | 519        | 0.307        |
| 0050767 | regulation of neurogenesis                                     | 3                     | 1512        | 2             | 1472        | 0.976        | 2                | 986        | 1          | 526        | 0.58         |
| 0007424 | tracheal system development (sensu Insecta)                    | 17                    | 1498        | 20            | 1454        | 0.678        | 12               | 976        | 5          | 522        | 0.832        |
| 0048513 | organ development                                              | 139                   | 1376        | 147           | 1327        | 0.497        | <b>71</b>        | <b>917</b> | <b>68</b>  | <b>459</b> | <b>3E-04</b> |
| 0007389 | pattern specification                                          | <b>26</b>             | <b>1489</b> | <b>50</b>     | <b>1424</b> | <b>0.005</b> | 17               | 971        | 9          | 518        | 0.85         |
| 0048066 | pigmentation                                                   | 5                     | 1510        | 6             | 1468        | 0.964        | 4                | 984        | 1          | 526        | 0.822        |
| 0009791 | post-embryonic development                                     | 10                    | 1505        | 7             | 1467        | 0.667        | 6                | 982        | 4          | 523        | 0.989        |
| 0009790 | embryonic development                                          | 54                    | 1461        | 46            | 1428        | 0.567        | 30               | 958        | 24         | 503        | 0.17         |
| 0007530 | sex determination                                              | 5                     | 1510        | 5             | 1469        | 0.785        | 3                | 985        | 2          | 525        | 0.822        |
| 0007548 | sex differentiation                                            | 10                    | 1505        | 9             | 1465        | 0.952        | 5                | 983        | 5          | 522        | 0.496        |
| 0019827 | stem cell maintenance                                          | 6                     | 1509        | 2             | 1472        | 0.306        | 5                | 983        | 1          | 526        | 0.614        |
| 0000003 | reproduction                                                   | 66                    | 1449        | 78            | 1396        | 0.268        | 37               | 951        | 29         | 498        | 0.143        |
| 0050793 | regulation of development                                      | 24                    | 1491        | 19            | 1455        | 0.6          | <b>8</b>         | <b>980</b> | <b>16</b>  | <b>511</b> | <b>0.002</b> |
| 0007582 | physiological process                                          | <b>860</b>            | <b>655</b>  | <b>745</b>    | <b>729</b>  | <b>7E-04</b> | <b>581</b>       | <b>407</b> | <b>279</b> | <b>248</b> | <b>0.032</b> |
| 0008152 | metabolism                                                     | <b>630</b>            | <b>885</b>  | <b>536</b>    | <b>938</b>  | <b>0.004</b> | <b>442</b>       | <b>546</b> | <b>188</b> | <b>339</b> | <b>8E-04</b> |
| 0009056 | catabolism                                                     | 117                   | 1398        | 92            | 1382        | 0.13         | <b>92</b>        | <b>896</b> | <b>25</b>  | <b>502</b> | <b>0.002</b> |
| 0006091 | energy pathways                                                | <b>80</b>             | <b>1435</b> | <b>28</b>     | <b>1446</b> | <b>1E-06</b> | <b>69</b>        | <b>919</b> | <b>11</b>  | <b>516</b> | <b>8E-05</b> |
| 0006118 | electron transport                                             | <b>38</b>             | <b>1477</b> | <b>17</b>     | <b>1457</b> | <b>0.009</b> | <b>32</b>        | <b>956</b> | <b>6</b>   | <b>521</b> | <b>0.02</b>  |
| 0006139 | nucleobase, nucleoside, nucleotide and nucleic acid metabolism | 224                   | 1291        | 208           | 1266        | 0.637        | 144              | 844        | 80         | 447        | 0.81         |
| 0006259 | DNA metabolism                                                 | 40                    | 1475        | 39            | 1435        | 0.917        | 26               | 962        | 14         | 513        | 0.889        |
| 0006350 | transcription                                                  | 110                   | 1405        | 117           | 1357        | 0.529        | <b>59</b>        | <b>929</b> | <b>51</b>  | <b>476</b> | <b>0.011</b> |
| 0043170 | macromolecule metabolism                                       | <b>346</b>            | <b>1169</b> | <b>282</b>    | <b>1192</b> | <b>0.015</b> | <b>252</b>       | <b>736</b> | <b>94</b>  | <b>433</b> | <b>9E-04</b> |
| 0019538 | protein metabolism                                             | 286                   | 1229        | 241           | 1233        | 0.078        | <b>202</b>       | <b>786</b> | <b>84</b>  | <b>443</b> | <b>0.039</b> |
| 0006412 | protein biosynthesis                                           | 49                    | 1466        | 61            | 1413        | 0.224        | 34               | 954        | 15         | 512        | 0.638        |
| 0006464 | protein modification                                           | <b>150</b>            | <b>1365</b> | <b>106</b>    | <b>1368</b> | <b>0.01</b>  | 100              | 888        | 50         | 477        | 0.762        |
| 0006457 | protein folding                                                | 24                    | 1491        | 19            | 1455        | 0.6          | 18               | 970        | 6          | 521        | 0.425        |
| 0005975 | carbohydrate metabolism                                        | 60                    | 1455        | 47            | 1427        | 0.3          | <b>51</b>        | <b>937</b> | <b>9</b>   | <b>518</b> | <b>0.002</b> |
| 0006519 | amino acid and derivative metabolism                           | 40                    | 1475        | 30            | 1444        | 0.331        | 29               | 959        | 11         | 516        | 0.417        |
| 0006629 | lipid metabolism                                               | 38                    | 1477        | 51            | 1423        | 0.155        | 26               | 962        | 12         | 515        | 0.804        |
| 0009308 | amine metabolism                                               | 43                    | 1472        | 38            | 1436        | 0.745        | 30               | 958        | 13         | 514        | 0.636        |
| 0042440 | pigment metabolism                                             | 5                     | 1510        | 7             | 1467        | 0.736        | 5                | 983        | 0          | 527        | 0.244        |
| 0042445 | hormone metabolism                                             | 2                     | 1513        | 5             | 1469        | 0.428        | 2                | 986        | 0          | 527        | 0.771        |
| 0009058 | biosynthesis                                                   | 99                    | 1416        | 105           | 1369        | 0.572        | <b>77</b>        | <b>911</b> | <b>22</b>  | <b>505</b> | <b>0.009</b> |
| 0019748 | secondary metabolism                                           | 5                     | 1510        | 9             | 1465        | 0.392        | 5                | 983        | 0          | 527        | 0.244        |
| 0019222 | regulation of metabolism                                       | 119                   | 1396        | 119           | 1355        | 0.878        | <b>60</b>        | <b>928</b> | <b>59</b>  | <b>468</b> | <b>6E-04</b> |
| 0016265 | death                                                          | 50                    | 1465        | 36            | 1438        | 0.196        | 33               | 955        | 17         | 510        | 0.974        |
| 0008219 | cell death                                                     | 42                    | 1473        | 32            | 1442        | 0.347        | 26               | 962        | 16         | 511        | 0.77         |
| 0016271 | tissue death                                                   | 17                    | 1498        | 10            | 1464        | 0.276        | 10               | 978        | 7          | 520        | 0.764        |
| 0042592 | homeostasis                                                    | 15                    | 1500        | 14            | 1460        | 0.941        | 11               | 977        | 4          | 523        | 0.696        |
| 0019725 | cell homeostasis                                               | 14                    | 1501        | 12            | 1462        | 0.899        | 11               | 977        | 3          | 524        | 0.44         |
| 0050801 | ion homeostasis                                                | 7                     | 1508        | 7             | 1467        | 0.829        | 6                | 982        | 1          | 526        | 0.457        |
| 0043062 | extracellular structure organization and biogenesis            | 11                    | 1504        | 8             | 1466        | 0.689        | 6                | 982        | 5          | 522        | 0.669        |
| 0046903 | secretion                                                      | 61                    | 1454        | 40            | 1434        | 0.059        | 42               | 946        | 19         | 508        | 0.637        |
| 0048511 | rhythmic process                                               | 8                     | 1507        | 9             | 1465        | 0.955        | 6                | 982        | 2          | 525        | 0.833        |

| GO#     | GO term                                                       | Representational bias |             |               |             |              | Directional bias |            |            |            |              |
|---------|---------------------------------------------------------------|-----------------------|-------------|---------------|-------------|--------------|------------------|------------|------------|------------|--------------|
|         |                                                               | regulated             |             | not regulated |             | $\rho$       | up-reg.          |            | down-reg.  |            | $\rho$       |
|         |                                                               | term                  | n.term      | term          | n.term      |              | term             | n.term     | term       | n.term     |              |
| 0050791 | regulation of physiological process                           | 179                   | 1336        | 168           | 1306        | 0.765        | <b>95</b>        | <b>893</b> | <b>84</b>  | <b>443</b> | <b>4E-04</b> |
| 0050874 | organismal physiological process                              | 117                   | 1398        | 115           | 1359        | 0.99         | <b>57</b>        | <b>931</b> | <b>60</b>  | <b>467</b> | <b>1E-04</b> |
| 0050875 | cellular physiological process                                | <b>820</b>            | <b>695</b>  | <b>699</b>    | <b>775</b>  | <b>3E-04</b> | <b>556</b>       | <b>432</b> | <b>264</b> | <b>263</b> | <b>0.025</b> |
| 0006810 | transport                                                     | <b>221</b>            | <b>1294</b> | <b>177</b>    | <b>1297</b> | <b>0.043</b> | 149              | 839        | 72         | 455        | 0.504        |
| 0006811 | ion transport                                                 | <b>75</b>             | <b>1440</b> | <b>45</b>     | <b>1429</b> | <b>0.011</b> | 48               | 940        | 27         | 500        | 0.919        |
| 0006818 | hydrogen transport                                            | <b>14</b>             | <b>1501</b> | <b>4</b>      | <b>1470</b> | <b>0.038</b> | 13               | 975        | 1          | 526        | 0.057        |
| 0006836 | neurotransmitter transport                                    | 3                     | 1512        | 2             | 1472        | 0.976        | 1                | 987        | 2          | 525        | 0.58         |
| 0006858 | extracellular transport                                       | 10                    | 1505        | 5             | 1469        | 0.326        | 5                | 983        | 5          | 522        | 0.496        |
| 0006869 | lipid transport                                               | 8                     | 1507        | 8             | 1466        | 0.845        | 7                | 981        | 1          | 526        | 0.34         |
| 0008643 | carbohydrate transport                                        | 8                     | 1507        | 7             | 1467        | 0.958        | 7                | 981        | 1          | 526        | 0.34         |
| 0015031 | protein transport                                             | 102                   | 1413        | 78            | 1396        | 0.114        | 69               | 919        | 33         | 494        | 0.67         |
| 0015837 | amine transport                                               | 7                     | 1508        | 5             | 1469        | 0.809        | 5                | 983        | 2          | 525        | 0.959        |
| 0015931 | nucleobase, nucleoside, nucleotide and nucleic acid transport | 7                     | 1508        | 6             | 1468        | 0.96         | 6                | 982        | 1          | 526        | 0.457        |
| 0016192 | vesicle-mediated transport                                    | <b>74</b>             | <b>1441</b> | <b>45</b>     | <b>1429</b> | <b>0.014</b> | 53               | 935        | 21         | 506        | 0.289        |
| 0045045 | secretory pathway                                             | <b>59</b>             | <b>1456</b> | <b>36</b>     | <b>1438</b> | <b>0.031</b> | 41               | 947        | 18         | 509        | 0.573        |
| 0046907 | intracellular transport                                       | 107                   | 1408        | 91            | 1383        | 0.366        | 74               | 914        | 33         | 494        | 0.433        |
| 0051049 | regulation of transport                                       | 9                     | 1506        | 9             | 1465        | 0.859        | 5                | 983        | 4          | 523        | 0.795        |
| 0008283 | cell proliferation                                            | 35                    | 1480        | 36            | 1438        | 0.907        | 22               | 966        | 13         | 514        | 0.907        |
| 0007049 | cell cycle                                                    | 60                    | 1455        | 68            | 1406        | 0.429        | 40               | 948        | 20         | 507        | 0.918        |
| 0017145 | stem cell division                                            | 7                     | 1508        | 5             | 1469        | 0.809        | 5                | 983        | 2          | 525        | 0.959        |
| 0016043 | cell organization and biogenesis                              | 131                   | 1384        | 144           | 1330        | 0.318        | <b>70</b>        | <b>918</b> | <b>61</b>  | <b>466</b> | <b>0.004</b> |
| 0000902 | cellular morphogenesis                                        | 44                    | 1471        | 36            | 1438        | 0.503        | <b>22</b>        | <b>966</b> | <b>22</b>  | <b>505</b> | <b>0.047</b> |
| 0006996 | organelle organization and biogenesis                         | 113                   | 1402        | 125           | 1349        | 0.335        | <b>60</b>        | <b>928</b> | <b>53</b>  | <b>474</b> | <b>0.007</b> |
| 0007010 | cytoskeleton organization and biogenesis                      | 82                    | 1433        | 88            | 1386        | 0.563        | <b>41</b>        | <b>947</b> | <b>41</b>  | <b>486</b> | <b>0.004</b> |
| 0006997 | nuclear organization and biogenesis                           | 4                     | 1511        | 6             | 1468        | 0.719        | 3                | 985        | 1          | 526        | 0.909        |
| 0007028 | cytoplasm organization and biogenesis                         | 10                    | 1505        | 9             | 1465        | 0.952        | 8                | 980        | 2          | 525        | 0.514        |
| 0016044 | membrane organization and biogenesis                          | 6                     | 1509        | 3             | 1471        | 0.531        | 5                | 983        | 1          | 526        | 0.614        |
| 0051128 | regulation of cell organization and biogenesis                | 8                     | 1507        | 3             | 1471        | 0.245        | 3                | 985        | 5          | 522        | 0.201        |
| 0016049 | cell growth                                                   | 5                     | 1510        | 4             | 1470        | 0.967        | 2                | 986        | 3          | 524        | 0.474        |
| 0050896 | response to stimulus                                          | 82                    | 1433        | 99            | 1375        | 0.156        | <b>43</b>        | <b>945</b> | <b>39</b>  | <b>488</b> | <b>0.017</b> |
| 0006950 | response to stress                                            | 24                    | 1491        | 35            | 1439        | 0.155        | 15               | 973        | 9          | 518        | 0.948        |
| 0009408 | response to heat                                              | 3                     | 1512        | 7             | 1467        | 0.32         | 1                | 987        | 2          | 525        | 0.58         |
| 0006979 | response to oxidative stress                                  | 1                     | 1514        | 1             | 1473        | 0.491        | 0                | 988        | 1          | 526        | 0.749        |
| 0051179 | localization                                                  | 236                   | 1279        | 193           | 1281        | 0.06         | 157              | 831        | 79         | 448        | 0.7          |
| 0006403 | RNA localization                                              | 14                    | 1501        | 18            | 1456        | 0.541        | 11               | 977        | 3          | 524        | 0.44         |
| 0008104 | protein localization                                          | 110                   | 1405        | 85            | 1389        | 0.114        | 73               | 915        | 37         | 490        | 0.874        |
| 0051234 | establishment of localization                                 | 223                   | 1292        | 180           | 1294        | 0.051        | 150              | 838        | 73         | 454        | 0.535        |
| 0051235 | maintenance of localization                                   | 2                     | 1513        | 2             | 1472        | 0.636        | 1                | 987        | 1          | 526        | 0.771        |
| 0050789 | regulation of biological process                              | 208                   | 1307        | 195           | 1279        | 0.729        | <b>113</b>       | <b>875</b> | <b>95</b>  | <b>432</b> | <b>5E-04</b> |
| 0050790 | regulation of enzyme activity                                 | 9                     | 1506        | 5             | 1469        | 0.452        | 8                | 980        | 1          | 526        | 0.252        |
| 0040029 | regulation of gene expression, epigenetic                     | 10                    | 1505        | 10            | 1464        | 0.871        | 6                | 982        | 4          | 523        | 0.989        |
| 0006306 | DNA methylation                                               | 3                     | 1512        | 4             | 1470        | 0.971        | 3                | 985        | 0          | 527        | 0.51         |
| 0045814 | negative regulation of gene expression, epigenetic            | 3                     | 1512        | 4             | 1470        | 0.971        | 1                | 987        | 2          | 525        | 0.58         |
| 0006342 | chromatin silencing                                           | 3                     | 1512        | 4             | 1470        | 0.971        | 1                | 987        | 2          | 525        | 0.58         |
| 0003674 | molecular_function                                            | <b>912</b>            | <b>603</b>  | <b>820</b>    | <b>654</b>  | <b>0.013</b> | 608              | 380        | 304        | 223        | 0.16         |
| 0016209 | antioxidant activity                                          | 5                     | 1510        | 4             | 1470        | 0.967        | 5                | 983        | 0          | 527        | 0.244        |
| 0005488 | binding                                                       | 521                   | 994         | 486           | 988         | 0.435        | <b>317</b>       | <b>671</b> | <b>204</b> | <b>323</b> | <b>0.011</b> |
| 0005509 | calcium ion binding                                           | 28                    | 1487        | 33            | 1441        | 0.531        | 14               | 974        | 14         | 513        | 0.132        |
| 0030246 | carbohydrate binding                                          | 8                     | 1507        | 7             | 1467        | 0.958        | 3                | 985        | 5          | 522        | 0.201        |
| 0008289 | lipid binding                                                 | 13                    | 1502        | 13            | 1461        | 0.899        | 5                | 983        | 8          | 519        | 0.082        |
| 0003676 | nucleic acid binding                                          | 191                   | 1324        | 198           | 1276        | 0.538        | <b>109</b>       | <b>879</b> | <b>82</b>  | <b>445</b> | <b>0.014</b> |
| 0003677 | DNA binding                                                   | 95                    | 1420        | 99            | 1375        | 0.674        | <b>47</b>        | <b>941</b> | <b>48</b>  | <b>479</b> | <b>0.001</b> |
| 0003682 | chromatin binding                                             | 9                     | 1506        | 14            | 1460        | 0.366        | 4                | 984        | 5          | 522        | 0.336        |
| 0003700 | transcription factor activity                                 | 43                    | 1472        | 43            | 1431        | 0.984        | <b>19</b>        | <b>969</b> | <b>24</b>  | <b>503</b> | <b>0.006</b> |
| 0003723 | RNA binding                                                   | 61                    | 1454        | 58            | 1416        | 0.973        | 37               | 951        | 24         | 503        | 0.531        |
| 0008135 | translation factor activity, nucleic acid binding             | 17                    | 1498        | 18            | 1456        | 0.935        | 15               | 973        | 2          | 525        | 0.08         |
| 0000166 | nucleotide binding                                            | 142                   | 1373        | 113           | 1361        | 0.109        | 100              | 888        | 42         | 485        | 0.202        |
| 0005515 | protein binding                                               | 184                   | 1331        | 195           | 1279        | 0.403        | <b>102</b>       | <b>886</b> | <b>82</b>  | <b>445</b> | <b>0.004</b> |
| 0008134 | transcription factor binding                                  | 10                    | 1505        | 21            | 1453        | 0.06         | 4                | 984        | 6          | 521        | 0.178        |
| 0008092 | cytoskeletal protein binding                                  | 41                    | 1474        | 47            | 1427        | 0.502        | <b>19</b>        | <b>969</b> | <b>22</b>  | <b>505</b> | <b>0.016</b> |
| 0003779 | actin binding                                                 | 24                    | 1491        | 29            | 1445        | 0.512        | 13               | 975        | 11         | 516        | 0.353        |
| 0003824 | catalytic activity                                            | <b>453</b>            | <b>1062</b> | <b>386</b>    | <b>1088</b> | <b>0.027</b> | <b>332</b>       | <b>656</b> | <b>121</b> | <b>406</b> | <b>2E-05</b> |
| 0016787 | hydrolase activity                                            | 196                   | 1319        | 176           | 1298        | 0.441        | <b>150</b>       | <b>838</b> | <b>46</b>  | <b>481</b> | <b>5E-04</b> |
| 0003924 | GTPase activity                                               | 17                    | 1498        | 23            | 1451        | 0.377        | 13               | 975        | 4          | 523        | 0.469        |
| 0004518 | nuclease activity                                             | 5                     | 1510        | 10            | 1464        | 0.276        | 4                | 984        | 1          | 526        | 0.822        |



## PC6

| GO#     | GO term                                    | Representational bias |             |               |             |              | Directional bias |            |            |            |              |
|---------|--------------------------------------------|-----------------------|-------------|---------------|-------------|--------------|------------------|------------|------------|------------|--------------|
|         |                                            | regulated             |             | not regulated |             | $\rho$       | up-reg.          |            | down-reg.  |            | $\rho$       |
|         |                                            | term                  | n.term      | term          | n.term      |              | term             | n.term     | term       | n.term     |              |
| 0008233 | peptidase activity                         | 67                    | 1448        | 51            | 1423        | 0.209        | <b>54</b>        | <b>934</b> | <b>13</b>  | <b>514</b> | <b>0.01</b>  |
| 0004721 | phosphoprotein phosphatase activity        | 18                    | 1497        | 12            | 1462        | 0.4          | 11               | 977        | 7          | 520        | 0.905        |
| 0016740 | transferase activity                       | 130                   | 1385        | 111           | 1363        | 0.324        | 93               | 895        | 37         | 490        | 0.137        |
| 0016301 | kinase activity                            | 80                    | 1435        | 55            | 1419        | 0.051        | 51               | 937        | 29         | 498        | 0.871        |
| 0004672 | protein kinase activity                    | 56                    | 1459        | 39            | 1435        | 0.125        | 32               | 956        | 24         | 503        | 0.25         |
| 0030234 | enzyme regulator activity                  | <b>65</b>             | <b>1450</b> | <b>40</b>     | <b>1434</b> | <b>0.025</b> | 44               | 944        | 21         | 506        | 0.768        |
| 0003774 | motor activity                             | 16                    | 1499        | 12            | 1462        | 0.619        | 8                | 980        | 8          | 519        | 0.307        |
| 0004871 | signal transducer activity                 | 134                   | 1381        | 122           | 1352        | 0.624        | <b>72</b>        | <b>916</b> | <b>62</b>  | <b>465</b> | <b>0.005</b> |
| 0004872 | receptor activity                          | 57                    | 1458        | 52            | 1422        | 0.807        | <b>27</b>        | <b>961</b> | <b>30</b>  | <b>497</b> | <b>0.006</b> |
| 0004879 | ligand-dependent nuclear receptor activity | 5                     | 1510        | 4             | 1470        | 0.967        | 3                | 985        | 2          | 525        | 0.822        |
| 0004888 | transmembrane receptor activity            | 39                    | 1476        | 35            | 1439        | 0.815        | 20               | 968        | 19         | 508        | 0.093        |
| 0004930 | G-protein coupled receptor activity        | 16                    | 1499        | 14            | 1460        | 0.914        | 10               | 978        | 6          | 521        | 0.972        |
| 0005057 | receptor signaling protein activity        | 48                    | 1467        | 32            | 1442        | 0.115        | 29               | 959        | 19         | 508        | 0.579        |
| 0005102 | receptor binding                           | 35                    | 1480        | 34            | 1440        | 0.908        | 19               | 969        | 16         | 511        | 0.233        |
| 0005198 | structural molecule activity               | 78                    | 1437        | 84            | 1390        | 0.56         | <b>41</b>        | <b>947</b> | <b>37</b>  | <b>490</b> | <b>0.022</b> |
| 0030528 | transcription regulator activity           | 93                    | 1422        | 106           | 1368        | 0.28         | <b>48</b>        | <b>940</b> | <b>45</b>  | <b>482</b> | <b>0.006</b> |
| 0045182 | translation regulator activity             | 17                    | 1498        | 18            | 1456        | 0.935        | 15               | 973        | 2          | 525        | 0.08         |
| 0005215 | transporter activity                       | <b>156</b>            | <b>1359</b> | <b>97</b>     | <b>1377</b> | <b>3E-04</b> | 112              | 876        | 44         | 483        | 0.083        |
| 0005489 | electron transporter activity              | 19                    | 1496        | 10            | 1464        | 0.156        | 16               | 972        | 3          | 524        | 0.132        |
| 0005216 | ion channel activity                       | 31                    | 1484        | 21            | 1453        | 0.246        | <b>13</b>        | <b>975</b> | <b>18</b>  | <b>509</b> | <b>0.01</b>  |
| 0005244 | voltage-gated ion channel activity         | 14                    | 1501        | 12            | 1462        | 0.899        | <b>3</b>         | <b>985</b> | <b>11</b>  | <b>516</b> | <b>0.002</b> |
| 0005575 | cellular_component                         | <b>647</b>            | <b>868</b>  | <b>576</b>    | <b>898</b>  | <b>0.048</b> | 429              | 559        | 218        | 309        | 0.474        |
| 0005623 | cell                                       | 585                   | 930         | 527           | 947         | 0.114        | 391              | 597        | 194        | 333        | 0.319        |
| 0005622 | intracellular                              | 448                   | 1067        | 409           | 1065        | 0.288        | <b>316</b>       | <b>672</b> | <b>132</b> | <b>395</b> | <b>0.006</b> |
| 0005737 | cytoplasm                                  | <b>267</b>            | <b>1248</b> | <b>191</b>    | <b>1283</b> | <b>5E-04</b> | <b>206</b>       | <b>782</b> | <b>61</b>  | <b>466</b> | <b>9E-06</b> |
| 0016023 | cytoplasmic vesicle                        | <b>28</b>             | <b>1487</b> | <b>13</b>     | <b>1461</b> | <b>0.035</b> | 20               | 968        | 8          | 519        | 0.619        |
| 0005829 | cytosol                                    | <b>52</b>             | <b>1463</b> | <b>27</b>     | <b>1447</b> | <b>0.009</b> | <b>42</b>        | <b>946</b> | <b>10</b>  | <b>517</b> | <b>0.025</b> |
| 0005783 | endoplasmic reticulum                      | 34                    | 1481        | 23            | 1451        | 0.218        | <b>29</b>        | <b>959</b> | <b>5</b>   | <b>522</b> | <b>0.021</b> |
| 0005794 | Golgi apparatus                            | 15                    | 1500        | 10            | 1464        | 0.463        | 11               | 977        | 4          | 523        | 0.696        |
| 0005815 | microtubule organizing center              | 3                     | 1512        | 6             | 1468        | 0.478        | 1                | 987        | 2          | 525        | 0.58         |
| 0005739 | mitochondrion                              | <b>66</b>             | <b>1449</b> | <b>39</b>     | <b>1435</b> | <b>0.015</b> | <b>57</b>        | <b>931</b> | <b>9</b>   | <b>518</b> | <b>4E-04</b> |
| 0005840 | ribosome                                   | 9                     | 1506        | 15            | 1459        | 0.275        | 7                | 981        | 2          | 525        | 0.658        |
| 0005773 | vacuole                                    | <b>13</b>             | <b>1502</b> | <b>1</b>      | <b>1473</b> | <b>0.004</b> | 12               | 976        | 1          | 526        | 0.077        |
| 0005764 | lysosome                                   | 4                     | 1511        | 1             | 1473        | 0.387        | 3                | 985        | 1          | 526        | 0.909        |
| 0005856 | cytoskeleton                               | 38                    | 1477        | 47            | 1427        | 0.313        | 19               | 969        | 19         | 508        | 0.068        |
| 0005694 | chromosome                                 | 14                    | 1501        | 26            | 1448        | 0.066        | 7                | 981        | 7          | 520        | 0.358        |
| 0000228 | nuclear chromosome                         | 0                     | 1515        | 5             | 1469        | 0.069        | 0                | 988        | 0          | 527        | -            |
| 0005634 | nucleus                                    | 179                   | 1336        | 193           | 1281        | 0.316        | 114              | 874        | 65         | 462        | 0.709        |
| 0005635 | nuclear membrane                           | 7                     | 1508        | 10            | 1464        | 0.587        | 4                | 984        | 3          | 524        | 0.959        |
| 0005730 | nucleolus                                  | 4                     | 1511        | 7             | 1467        | 0.516        | 4                | 984        | 0          | 527        | 0.349        |
| 0005654 | nucleoplasm                                | 37                    | 1478        | 35            | 1439        | 0.999        | 27               | 961        | 10         | 517        | 0.407        |
| 0005777 | peroxisome                                 | 4                     | 1511        | 5             | 1469        | 0.967        | 3                | 985        | 1          | 526        | 0.909        |
| 0005886 | plasma membrane                            | 84                    | 1431        | 72            | 1402        | 0.466        | <b>40</b>        | <b>948</b> | <b>44</b>  | <b>483</b> | <b>8E-04</b> |
| 0005576 | extracellular region                       | 37                    | 1478        | 39            | 1435        | 0.812        | 21               | 967        | 16         | 511        | 0.358        |
| 0005578 | extracellular matrix (sensu Metazoa)       | 20                    | 1495        | 15            | 1459        | 0.549        | 9                | 979        | 11         | 516        | 0.094        |

| GO#     | GO term                                                                           | Representational bias |        |               |        |        | Directional bias |            |           |            |              |
|---------|-----------------------------------------------------------------------------------|-----------------------|--------|---------------|--------|--------|------------------|------------|-----------|------------|--------------|
|         |                                                                                   | regulated             |        | not regulated |        | $\rho$ | up-reg.          |            | down-reg. |            | $\rho$       |
|         |                                                                                   | term                  | n.term | term          | n.term |        | term             | n.term     | term      | n.term     |              |
| 0008150 | biological_process                                                                | 885                   | 617    | 869           | 618    | 0.818  | 304              | 233        | 581       | 384        | 0.193        |
| 0007610 | behavior                                                                          | 82                    | 1420   | 80            | 1407   | 0.988  | 25               | 512        | 57        | 908        | 0.366        |
| 0030534 | adult behavior                                                                    | 10                    | 1492   | 14            | 1473   | 0.522  | 7                | 530        | 3         | 962        | 0.053        |
| 0030537 | larval behavior                                                                   | 6                     | 1496   | 3             | 1484   | 0.514  | 4                | 533        | 2         | 963        | 0.248        |
| 0007611 | learning and/or memory                                                            | 11                    | 1491   | 13            | 1474   | 0.818  | 2                | 535        | 9         | 956        | 0.366        |
| 0007612 | learning                                                                          | 8                     | 1494   | 7             | 1480   | 0.984  | 1                | 536        | 7         | 958        | 0.314        |
| 0007613 | memory                                                                            | 2                     | 1500   | 9             | 1478   | 0.067  | 0                | 537        | 2         | 963        | 0.751        |
| 0007626 | locomotory behavior                                                               | 58                    | 1444   | 65            | 1422   | 0.542  | 19               | 518        | 39        | 926        | 0.73         |
| 0007635 | chemosensory behavior                                                             | 9                     | 1493   | 9             | 1478   | 0.83   | 2                | 535        | 7         | 958        | 0.617        |
| 0007622 | rhythmic behavior                                                                 | 6                     | 1496   | 9             | 1478   | 0.591  | 2                | 535        | 4         | 961        | 0.762        |
| 0048512 | circadian behavior                                                                | 5                     | 1497   | 9             | 1478   | 0.411  | 2                | 535        | 3         | 962        | 0.788        |
| 0009987 | cellular process                                                                  | 815                   | 687    | 813           | 674    | 0.849  | 273              | 264        | 542       | 423        | 0.053        |
| 0007154 | cell communication                                                                | 252                   | 1250   | 237           | 1250   | 0.568  | 92               | 445        | 160       | 805        | 0.84         |
| 0007155 | cell adhesion                                                                     | 46                    | 1456   | 44            | 1443   | 0.953  | 16               | 521        | 30        | 935        | 0.987        |
| 0008037 | cell recognition                                                                  | 2                     | 1500   | 0             | 1487   | 0.484  | 0                | 537        | 2         | 963        | 0.751        |
| 0008038 | neuronal cell recognition                                                         | 2                     | 1500   | 0             | 1487   | 0.484  | 0                | 537        | 2         | 963        | 0.751        |
| 0016337 | cell-cell adhesion                                                                | 20                    | 1482   | 19            | 1468   | 0.975  | 9                | 528        | 11        | 954        | 0.526        |
| 0016339 | calcium-dependent cell-cell adhesion                                              | 2                     | 1500   | 5             | 1482   | 0.441  | 2                | 535        | 0         | 965        | 0.247        |
| 0007156 | homophilic cell adhesion                                                          | 3                     | 1499   | 6             | 1481   | 0.495  | 2                | 535        | 1         | 964        | 0.606        |
| 0007160 | cell-matrix adhesion                                                              | 4                     | 1498   | 5             | 1482   | 0.988  | 3                | 534        | 1         | 964        | 0.264        |
| 0007267 | cell-cell signaling                                                               | 74                    | 1428   | 82            | 1405   | 0.522  | 31               | 506        | 43        | 922        | 0.315        |
| 0019226 | transmission of nerve impulse                                                     | 68                    | 1434   | 70            | 1417   | 0.883  | 29               | 508        | 39        | 926        | 0.278        |
| 0007268 | synaptic transmission                                                             | 45                    | 1457   | 56            | 1431   | 0.288  | <b>24</b>        | <b>513</b> | <b>21</b> | <b>944</b> | <b>0.019</b> |
| 0007270 | nerve-nerve synaptic transmission                                                 | 7                     | 1495   | 9             | 1478   | 0.787  | <b>7</b>         | <b>530</b> | <b>0</b>  | <b>965</b> | <b>0.002</b> |
| 0001505 | regulation of neurotransmitter levels                                             | 28                    | 1474   | 32            | 1455   | 0.667  | 13               | 524        | 15        | 950        | 0.322        |
| 0042133 | neurotransmitter metabolism                                                       | 4                     | 1498   | 4             | 1483   | 0.734  | <b>4</b>         | <b>533</b> | <b>0</b>  | <b>965</b> | <b>0.031</b> |
| 0007269 | neurotransmitter secretion                                                        | 25                    | 1477   | 28            | 1459   | 0.753  | 10               | 527        | 15        | 950        | 0.813        |
| 0007165 | signal transduction                                                               | 198                   | 1304   | 181           | 1306   | 0.438  | 70               | 467        | 128       | 837        | 0.963        |
| 0007166 | cell surface receptor linked signal transduction                                  | 85                    | 1417   | 72            | 1415   | 0.358  | 25               | 512        | 60        | 905        | 0.255        |
| 0007167 | enzyme linked receptor protein signaling pathway                                  | 21                    | 1481   | 25            | 1462   | 0.631  | 5                | 532        | 16        | 949        | 0.357        |
| 0007178 | transmembrane receptor protein serine/threonine kinase signaling pathway          | 9                     | 1493   | 7             | 1480   | 0.818  | 2                | 535        | 7         | 958        | 0.617        |
| 0007179 | transforming growth factor beta receptor signaling pathway                        | 5                     | 1497   | 4             | 1483   | 0.988  | 1                | 536        | 4         | 961        | 0.788        |
| 0007169 | transmembrane receptor protein tyrosine kinase signaling pathway                  | 14                    | 1488   | 18            | 1469   | 0.574  | 3                | 534        | 11        | 954        | 0.399        |
| 0007173 | epidermal growth factor receptor signaling pathway                                | 4                     | 1498   | 4             | 1483   | 0.734  | 0                | 537        | 4         | 961        | 0.331        |
| 0008286 | insulin receptor signaling pathway                                                | 1                     | 1501   | 3             | 1484   | 0.61   | 0                | 537        | 1         | 964        | 0.766        |
| 0008293 | torso signaling pathway                                                           | 2                     | 1500   | 5             | 1482   | 0.441  | 1                | 536        | 1         | 964        | 0.751        |
| 0007186 | G-protein coupled receptor protein signaling pathway                              | 41                    | 1461   | 30            | 1457   | 0.247  | 14               | 523        | 27        | 938        | 0.958        |
| 0007200 | G-protein signaling, coupled to IP3 second messenger (phospholipase C activating) | 4                     | 1498   | 1             | 1486   | 0.377  | 1                | 536        | 3         | 962        | 0.942        |
| 0007219 | Notch signaling pathway                                                           | 9                     | 1493   | 4             | 1483   | 0.274  | 1                | 536        | 8         | 957        | 0.231        |
| 0007224 | smoothened signaling pathway                                                      | 3                     | 1499   | 3             | 1484   | 0.692  | 0                | 537        | 3         | 962        | 0.49         |
| 0008063 | Toll signaling pathway                                                            | 2                     | 1500   | 2             | 1485   | 0.624  | 0                | 537        | 2         | 963        | 0.751        |
| 0016055 | Wnt receptor signaling pathway                                                    | 9                     | 1493   | 7             | 1480   | 0.818  | 1                | 536        | 8         | 957        | 0.231        |
| 0007242 | intracellular signaling cascade                                                   | 98                    | 1404   | 84            | 1403   | 0.355  | 31               | 506        | 67        | 898        | 0.441        |
| 0007263 | nitric oxide mediated signal transduction                                         | 2                     | 1500   | 2             | 1485   | 0.624  | 1                | 536        | 1         | 964        | 0.751        |
| 0007243 | protein kinase cascade                                                            | 25                    | 1477   | 16            | 1471   | 0.22   | 6                | 531        | 19        | 946        | 0.305        |
| 0007259 | JAK-STAT cascade                                                                  | 3                     | 1499   | 3             | 1484   | 0.692  | 0                | 537        | 3         | 962        | 0.49         |
| 0000165 | MAPKKK cascade                                                                    | 22                    | 1480   | 11            | 1476   | 0.085  | 6                | 531        | 16        | 949        | 0.541        |
| 0019932 | second-messenger-mediated signaling                                               | 12                    | 1490   | 10            | 1477   | 0.849  | 7                | 530        | 5         | 960        | 0.181        |
| 0019722 | calcium-mediated signaling                                                        | 8                     | 1494   | 7             | 1480   | 0.984  | 6                | 531        | 2         | 963        | 0.051        |
| 0048015 | phosphoinositide-mediated signaling                                               | 4                     | 1498   | 1             | 1486   | 0.377  | 1                | 536        | 3         | 962        | 0.942        |
| 0007264 | small GTPase mediated signal transduction                                         | 28                    | 1474   | 16            | 1471   | 0.102  | 11               | 526        | 17        | 948        | 0.846        |
| 0007265 | Ras protein signal transduction                                                   | 5                     | 1497   | 5             | 1482   | 0.764  | 2                | 535        | 3         | 962        | 0.788        |
| 0009966 | regulation of signal transduction                                                 | 20                    | 1482   | 14            | 1473   | 0.405  | 5                | 532        | 15        | 950        | 0.438        |
| 0007275 | development                                                                       | 229                   | 1273   | 231           | 1256   | 0.867  | 75               | 462        | 154       | 811        | 0.34         |
| 0007568 | aging                                                                             | 5                     | 1497   | 6             | 1481   | 0.987  | 2                | 535        | 3         | 962        | 0.788        |
| 0030154 | cell differentiation                                                              | 63                    | 1439   | 56            | 1431   | 0.613  | 17               | 520        | 46        | 919        | 0.177        |
| 0048468 | cell development                                                                  | 39                    | 1463   | 36            | 1451   | 0.849  | 13               | 524        | 26        | 939        | 0.881        |
| 0000904 | cellular morphogenesis during differentiation                                     | 9                     | 1493   | 10            | 1477   | 0.982  | 4                | 533        | 5         | 960        | 0.844        |
| 0042461 | photoreceptor cell development                                                    | 9                     | 1493   | 9             | 1478   | 0.83   | 4                | 533        | 5         | 960        | 0.844        |
| 0042051 | eye photoreceptor development (sensu Endopterygota)                               | 9                     | 1493   | 8             | 1479   | 0.983  | 4                | 533        | 5         | 960        | 0.844        |
| 0045165 | cell fate commitment                                                              | 24                    | 1478   | 25            | 1462   | 0.972  | 7                | 530        | 17        | 948        | 0.643        |

| GO#     | GO term                                                        | Representational bias |             |               |             |              | Directional bias |            |            |            |              |
|---------|----------------------------------------------------------------|-----------------------|-------------|---------------|-------------|--------------|------------------|------------|------------|------------|--------------|
|         |                                                                | regulated             |             | not regulated |             | $\rho$       | up-reg.          |            | down-reg.  |            | $\rho$       |
|         |                                                                | term                  | n.term      | term          | n.term      |              | term             | n.term     | term       | n.term     |              |
| 0001709 | cell fate determination                                        | 16                    | 1486        | 14            | 1473        | 0.876        | 4                | 533        | 12         | 953        | 0.522        |
| 0007400 | neuroblast cell fate determination                             | 6                     | 1496        | 2             | 1485        | 0.295        | 1                | 536        | 5          | 960        | 0.582        |
| 0001708 | cell fate specification                                        | 2                     | 1500        | 6             | 1481        | 0.282        | 0                | 537        | 2          | 963        | 0.751        |
| 0007349 | cellularization                                                | 7                     | 1495        | 4             | 1483        | 0.557        | 2                | 535        | 5          | 960        | 0.998        |
| 0040007 | growth                                                         | 14                    | 1488        | 22            | 1465        | 0.229        | 4                | 533        | 10         | 955        | 0.777        |
| 0002164 | larval development                                             | 12                    | 1490        | 5             | 1482        | 0.15         | 4                | 533        | 8          | 957        | 0.899        |
| 0002165 | larval or pupal development (sensu Insecta)                    | 67                    | 1435        | 62            | 1425        | 0.763        | <b>14</b>        | <b>523</b> | <b>53</b>  | <b>912</b> | <b>0.014</b> |
| 0007552 | metamorphosis                                                  | 60                    | 1442        | 61            | 1426        | 0.955        | <b>11</b>        | <b>526</b> | <b>49</b>  | <b>916</b> | <b>0.006</b> |
| 0009653 | morphogenesis                                                  | 157                   | 1345        | 162           | 1325        | 0.74         | 48               | 489        | 109        | 856        | 0.179        |
| 0002009 | morphogenesis of an epithelium                                 | 24                    | 1478        | 20            | 1467        | 0.673        | 4                | 533        | 20         | 945        | 0.08         |
| 0009887 | organogenesis                                                  | 139                   | 1363        | 143           | 1344        | 0.782        | 42               | 495        | 97         | 868        | 0.181        |
| 0001654 | eye morphogenesis                                              | 24                    | 1478        | 33            | 1454        | 0.268        | 6                | 531        | 18         | 947        | 0.372        |
| 0008406 | gonad development                                              | 4                     | 1498        | 7             | 1480        | 0.535        | 2                | 535        | 2          | 963        | 0.942        |
| 0007444 | imaginal disc development                                      | 43                    | 1459        | 50            | 1437        | 0.496        | <b>7</b>         | <b>530</b> | <b>36</b>  | <b>929</b> | <b>0.011</b> |
| 0007494 | midgut development                                             | 1                     | 1501        | 4             | 1483        | 0.365        | 0                | 537        | 1          | 964        | 0.766        |
| 0007517 | muscle development                                             | 16                    | 1486        | 18            | 1469        | 0.84         | 6                | 531        | 10         | 955        | 0.908        |
| 0007399 | neurogenesis                                                   | <b>95</b>             | <b>1407</b> | <b>67</b>     | <b>1420</b> | <b>0.034</b> | 27               | 510        | 68         | 897        | 0.153        |
| 0007409 | axonogenesis                                                   | 25                    | 1477        | 18            | 1469        | 0.374        | 4                | 533        | 21         | 944        | 0.062        |
| 0007411 | axon guidance                                                  | 17                    | 1485        | 16            | 1471        | 0.977        | 4                | 533        | 13         | 952        | 0.422        |
| 0007417 | central nervous system development                             | 21                    | 1481        | 18            | 1469        | 0.771        | 8                | 529        | 13         | 952        | 0.997        |
| 0016358 | dendrite morphogenesis                                         | 8                     | 1494        | 6             | 1481        | 0.803        | 3                | 534        | 5          | 960        | 0.79         |
| 0042063 | gliogenesis                                                    | 7                     | 1495        | 4             | 1483        | 0.557        | 0                | 537        | 7          | 958        | 0.113        |
| 0007422 | peripheral nervous system development                          | 25                    | 1477        | 15            | 1472        | 0.161        | 8                | 529        | 17         | 948        | 0.854        |
| 0050767 | regulation of neurogenesis                                     | 3                     | 1499        | 2             | 1485        | 0.991        | 1                | 536        | 2          | 963        | 0.606        |
| 0007424 | tracheal system development (sensu Insecta)                    | 20                    | 1482        | 17            | 1470        | 0.764        | 6                | 531        | 14         | 951        | 0.76         |
| 0048513 | organ development                                              | 141                   | 1361        | 145           | 1342        | 0.783        | 42               | 495        | 99         | 866        | 0.144        |
| 0007389 | pattern specification                                          | 35                    | 1467        | 41            | 1446        | 0.532        | 9                | 528        | 26         | 939        | 0.282        |
| 0048066 | pigmentation                                                   | 5                     | 1497        | 6             | 1481        | 0.987        | 3                | 534        | 2          | 963        | 0.506        |
| 0009791 | post-embryonic development                                     | 12                    | 1490        | 5             | 1482        | 0.15         | 4                | 533        | 8          | 957        | 0.899        |
| 0009790 | embryonic development                                          | 51                    | 1451        | 49            | 1438        | 0.96         | 14               | 523        | 37         | 928        | 0.267        |
| 0007530 | sex determination                                              | 6                     | 1496        | 4             | 1483        | 0.764        | 1                | 536        | 5          | 960        | 0.582        |
| 0007548 | sex differentiation                                            | 6                     | 1496        | 13            | 1474        | 0.161        | 3                | 534        | 3          | 962        | 0.762        |
| 0019827 | stem cell maintenance                                          | 4                     | 1498        | 4             | 1483        | 0.734        | 0                | 537        | 4          | 961        | 0.331        |
| 0000003 | reproduction                                                   | 68                    | 1434        | 76            | 1411        | 0.509        | <b>15</b>        | <b>522</b> | <b>53</b>  | <b>912</b> | <b>0.023</b> |
| 0050793 | regulation of development                                      | 19                    | 1483        | 24            | 1463        | 0.517        | 3                | 534        | 16         | 949        | 0.113        |
| 0007582 | physiological process                                          | 804                   | 698         | 801           | 686         | 0.882        | <b>268</b>       | <b>269</b> | <b>536</b> | <b>429</b> | <b>0.041</b> |
| 0008152 | metabolism                                                     | 567                   | 935         | 599           | 888         | 0.167        | 192              | 345        | 375        | 590        | 0.257        |
| 0009056 | catabolism                                                     | 105                   | 1397        | 104           | 1383        | 0.946        | 38               | 499        | 67         | 898        | 0.993        |
| 0006091 | energy pathways                                                | 57                    | 1445        | 51            | 1436        | 0.662        | <b>36</b>        | <b>501</b> | <b>21</b>  | <b>944</b> | <b>2E-05</b> |
| 0006118 | electron transport                                             | 31                    | 1471        | 24            | 1463        | 0.436        | <b>17</b>        | <b>520</b> | <b>14</b>  | <b>951</b> | <b>0.04</b>  |
| 0006139 | nucleobase, nucleoside, nucleotide and nucleic acid metabolism | <b>196</b>            | <b>1306</b> | <b>236</b>    | <b>1251</b> | <b>0.032</b> | 63               | 474        | 133        | 832        | 0.293        |
| 0006259 | DNA metabolism                                                 | 37                    | 1465        | 42            | 1445        | 0.616        | 11               | 526        | 26         | 939        | 0.548        |
| 0006350 | transcription                                                  | 113                   | 1389        | 114           | 1373        | 0.937        | <b>30</b>        | <b>507</b> | <b>83</b>  | <b>882</b> | <b>0.043</b> |
| 0043170 | macromolecule metabolism                                       | 303                   | 1199        | 325           | 1162        | 0.278        | <b>82</b>        | <b>455</b> | <b>221</b> | <b>744</b> | <b>5E-04</b> |
| 0019538 | protein metabolism                                             | 254                   | 1248        | 273           | 1214        | 0.322        | <b>61</b>        | <b>476</b> | <b>193</b> | <b>772</b> | <b>3E-05</b> |
| 0006412 | protein biosynthesis                                           | 53                    | 1449        | 57            | 1430        | 0.73         | 14               | 523        | 39         | 926        | 0.194        |
| 0006464 | protein modification                                           | 122                   | 1380        | 134           | 1353        | 0.422        | <b>29</b>        | <b>508</b> | <b>93</b>  | <b>872</b> | <b>0.005</b> |
| 0006457 | protein folding                                                | 22                    | 1480        | 21            | 1466        | 0.974        | 5                | 532        | 17         | 948        | 0.289        |
| 0005975 | carbohydrate metabolism                                        | 51                    | 1451        | 56            | 1431        | 0.655        | 21               | 516        | 30         | 935        | 0.501        |
| 0006519 | amino acid and derivative metabolism                           | 35                    | 1467        | 35            | 1452        | 0.937        | 15               | 522        | 20         | 945        | 0.478        |
| 0006629 | lipid metabolism                                               | 42                    | 1460        | 47            | 1440        | 0.632        | 13               | 524        | 29         | 936        | 0.621        |
| 0009308 | amine metabolism                                               | 40                    | 1462        | 41            | 1446        | 0.963        | 16               | 521        | 24         | 941        | 0.688        |
| 0042440 | pigment metabolism                                             | 6                     | 1496        | 6             | 1481        | 0.786        | 4                | 533        | 2          | 963        | 0.248        |
| 0042445 | hormone metabolism                                             | 3                     | 1499        | 4             | 1483        | 0.989        | 1                | 536        | 2          | 963        | 0.606        |
| 0009058 | biosynthesis                                                   | 104                   | 1398        | 100           | 1387        | 0.886        | 42               | 495        | 62         | 903        | 0.36         |
| 0019748 | secondary metabolism                                           | 7                     | 1495        | 7             | 1480        | 0.803        | 5                | 532        | 2          | 963        | 0.114        |
| 0019222 | regulation of metabolism                                       | 120                   | 1382        | 118           | 1369        | 0.99         | <b>28</b>        | <b>509</b> | <b>92</b>  | <b>873</b> | <b>0.004</b> |
| 0016265 | death                                                          | 48                    | 1454        | 38            | 1449        | 0.348        | 11               | 526        | 37         | 928        | 0.083        |
| 0008219 | cell death                                                     | 42                    | 1460        | 32            | 1455        | 0.31         | <b>8</b>         | <b>529</b> | <b>34</b>  | <b>931</b> | <b>0.033</b> |
| 0016271 | tissue death                                                   | 17                    | 1485        | 10            | 1477        | 0.257        | 4                | 533        | 13         | 952        | 0.422        |
| 0042592 | homeostasis                                                    | 17                    | 1485        | 12            | 1475        | 0.472        | 8                | 529        | 9          | 956        | 0.469        |
| 0019725 | cell homeostasis                                               | 14                    | 1488        | 12            | 1475        | 0.864        | 7                | 530        | 7          | 958        | 0.402        |
| 0050801 | ion homeostasis                                                | 8                     | 1494        | 6             | 1481        | 0.803        | 4                | 533        | 4          | 961        | 0.636        |
| 0043062 | extracellular structure organization and biogenesis            | 10                    | 1492        | 9             | 1478        | 0.982        | 1                | 536        | 9          | 956        | 0.169        |
| 0046903 | secretion                                                      | 57                    | 1445        | 44            | 1443        | 0.245        | 19               | 518        | 38         | 927        | 0.804        |
| 0048511 | rhythmic process                                               | 7                     | 1495        | 10            | 1477        | 0.612        | 2                | 535        | 5          | 960        | 0.998        |

| GO#     | GO term                                                       | Representational bias |             |               |             |              | Directional bias |            |            |            |              |
|---------|---------------------------------------------------------------|-----------------------|-------------|---------------|-------------|--------------|------------------|------------|------------|------------|--------------|
|         |                                                               | regulated             |             | not regulated |             | $\rho$       | up-reg.          |            | down-reg.  |            | $\rho$       |
|         |                                                               | term                  | n.term      | term          | n.term      |              | term             | n.term     | term       | n.term     |              |
| 0050791 | regulation of physiological process                           | 189                   | 1313        | 158           | 1329        | 0.107        | <b>41</b>        | <b>496</b> | <b>148</b> | <b>817</b> | <b>2E-05</b> |
| 0050874 | organismal physiological process                              | 115                   | 1387        | 117           | 1370        | 0.882        | 49               | 488        | 66         | 899        | 0.135        |
| 0050875 | cellular physiological process                                | 756                   | 746         | 763           | 724         | 0.618        | <b>248</b>       | <b>289</b> | <b>508</b> | <b>457</b> | <b>0.019</b> |
| 0006810 | transport                                                     | 196                   | 1306        | 202           | 1285        | 0.706        | 67               | 470        | 129        | 836        | 0.681        |
| 0006811 | ion transport                                                 | 58                    | 1444        | 62            | 1425        | 0.737        | <b>34</b>        | <b>503</b> | <b>24</b>  | <b>941</b> | <b>4E-04</b> |
| 0006818 | hydrogen transport                                            | 9                     | 1493        | 9             | 1478        | 0.83         | <b>8</b>         | <b>529</b> | <b>1</b>   | <b>964</b> | <b>0.003</b> |
| 0006836 | neurotransmitter transport                                    | 1                     | 1501        | 4             | 1483        | 0.365        | 1                | 536        | 0          | 965        | 0.766        |
| 0006858 | extracellular transport                                       | 5                     | 1497        | 10            | 1477        | 0.291        | 3                | 534        | 2          | 963        | 0.506        |
| 0006869 | lipid transport                                               | 7                     | 1495        | 9             | 1478        | 0.787        | 1                | 536        | 6          | 959        | 0.428        |
| 0008643 | carbohydrate transport                                        | 6                     | 1496        | 9             | 1478        | 0.591        | 1                | 536        | 5          | 960        | 0.582        |
| 0015031 | protein transport                                             | 98                    | 1404        | 82            | 1405        | 0.278        | <b>20</b>        | <b>517</b> | <b>78</b>  | <b>887</b> | <b>0.002</b> |
| 0015837 | amine transport                                               | 3                     | 1499        | 9             | 1478        | 0.143        | 2                | 535        | 1          | 964        | 0.606        |
| 0015931 | nucleobase, nucleoside, nucleotide and nucleic acid transport | 4                     | 1498        | 9             | 1478        | 0.258        | 1                | 536        | 3          | 962        | 0.942        |
| 0016192 | vesicle-mediated transport                                    | 65                    | 1437        | 54            | 1433        | 0.379        | 20               | 517        | 45         | 920        | 0.469        |
| 0045045 | secretory pathway                                             | 55                    | 1447        | 40            | 1447        | 0.159        | 18               | 519        | 37         | 928        | 0.739        |
| 0046907 | intracellular transport                                       | 103                   | 1399        | 95            | 1392        | 0.659        | <b>22</b>        | <b>515</b> | <b>81</b>  | <b>884</b> | <b>0.002</b> |
| 0051049 | regulation of transport                                       | <b>15</b>             | <b>1487</b> | <b>3</b>      | <b>1484</b> | <b>0.01</b>  | 5                | 532        | 10         | 955        | 0.941        |
| 0008283 | cell proliferation                                            | 36                    | 1466        | 35            | 1452        | 0.966        | 9                | 528        | 27         | 938        | 0.235        |
| 0007049 | cell cycle                                                    | 59                    | 1443        | 69            | 1418        | 0.384        | <b>7</b>         | <b>530</b> | <b>52</b>  | <b>913</b> | <b>2E-04</b> |
| 0017145 | stem cell division                                            | 8                     | 1494        | 4             | 1483        | 0.395        | 1                | 536        | 7          | 958        | 0.314        |
| 0016043 | cell organization and biogenesis                              | 140                   | 1362        | 135           | 1352        | 0.868        | <b>36</b>        | <b>501</b> | <b>104</b> | <b>861</b> | <b>0.012</b> |
| 0000902 | cellular morphogenesis                                        | 41                    | 1461        | 39            | 1448        | 0.946        | 13               | 524        | 28         | 937        | 0.702        |
| 0006996 | organelle organization and biogenesis                         | 119                   | 1383        | 119           | 1368        | 0.99         | <b>24</b>        | <b>513</b> | <b>95</b>  | <b>870</b> | <b>3E-04</b> |
| 0007010 | cytoskeleton organization and biogenesis                      | 83                    | 1419        | 87            | 1400        | 0.761        | <b>19</b>        | <b>518</b> | <b>64</b>  | <b>901</b> | <b>0.017</b> |
| 0006997 | nuclear organization and biogenesis                           | 4                     | 1498        | 6             | 1481        | 0.739        | 0                | 537        | 4          | 961        | 0.331        |
| 0007028 | cytoplasm organization and biogenesis                         | 9                     | 1493        | 10            | 1477        | 0.982        | 3                | 534        | 6          | 959        | 0.844        |
| 0016044 | membrane organization and biogenesis                          | 4                     | 1498        | 5             | 1482        | 0.988        | 0                | 537        | 4          | 961        | 0.331        |
| 0051128 | regulation of cell organization and biogenesis                | 5                     | 1497        | 6             | 1481        | 0.987        | 0                | 537        | 5          | 960        | 0.229        |
| 0016049 | cell growth                                                   | 2                     | 1500        | 7             | 1480        | 0.177        | 1                | 536        | 1          | 964        | 0.751        |
| 0050896 | response to stimulus                                          | 89                    | 1413        | 92            | 1395        | 0.824        | 30               | 507        | 59         | 906        | 0.763        |
| 0006950 | response to stress                                            | 32                    | 1470        | 27            | 1460        | 0.626        | 9                | 528        | 23         | 942        | 0.469        |
| 0009408 | response to heat                                              | 8                     | 1494        | 2             | 1485        | 0.117        | 4                | 533        | 4          | 961        | 0.636        |
| 0006979 | response to oxidative stress                                  | 1                     | 1501        | 1             | 1486        | 0.484        | 0                | 537        | 1          | 964        | 0.766        |
| 0051179 | localization                                                  | 210                   | 1292        | 219           | 1268        | 0.596        | 72               | 465        | 138        | 827        | 0.689        |
| 0006403 | RNA localization                                              | 15                    | 1487        | 17            | 1470        | 0.837        | 6                | 531        | 9          | 956        | 0.941        |
| 0008104 | protein localization                                          | 107                   | 1395        | 88            | 1399        | 0.207        | <b>22</b>        | <b>515</b> | <b>85</b>  | <b>880</b> | <b>1E-03</b> |
| 0051234 | establishment of localization                                 | 198                   | 1304        | 205           | 1282        | 0.667        | 68               | 469        | 130        | 835        | 0.716        |
| 0051235 | maintenance of localization                                   | 2                     | 1500        | 2             | 1485        | 0.624        | 1                | 536        | 1          | 964        | 0.751        |
| 0050789 | regulation of biological process                              | 220                   | 1282        | 183           | 1304        | 0.069        | <b>52</b>        | <b>485</b> | <b>168</b> | <b>797</b> | <b>7E-05</b> |
| 0050790 | regulation of enzyme activity                                 | 6                     | 1496        | 8             | 1479        | 0.774        | 2                | 535        | 4          | 961        | 0.762        |
| 0040029 | regulation of gene expression, epigenetic                     | 10                    | 1492        | 10            | 1477        | 0.84         | 3                | 534        | 7          | 958        | 0.96         |
| 0006306 | DNA methylation                                               | 2                     | 1500        | 5             | 1482        | 0.441        | 2                | 535        | 0          | 965        | 0.247        |
| 0045814 | negative regulation of gene expression, epigenetic            | 5                     | 1497        | 2             | 1485        | 0.457        | 1                | 536        | 4          | 961        | 0.788        |
| 0006342 | chromatin silencing                                           | 5                     | 1497        | 2             | 1485        | 0.457        | 1                | 536        | 4          | 961        | 0.788        |
| 0003674 | molecular_function                                            | 870                   | 632         | 862           | 625         | 0.991        | 303              | 234        | 567        | 398        | 0.411        |
| 0016209 | antioxidant activity                                          | 7                     | 1495        | 2             | 1485        | 0.187        | 4                | 533        | 3          | 962        | 0.43         |
| 0005488 | binding                                                       | 496                   | 1006        | 511           | 976         | 0.461        | <b>148</b>       | <b>389</b> | <b>348</b> | <b>617</b> | <b>1E-03</b> |
| 0005509 | calcium ion binding                                           | 36                    | 1466        | 25            | 1462        | 0.21         | 17               | 520        | 19         | 946        | 0.201        |
| 0030246 | carbohydrate binding                                          | 10                    | 1492        | 5             | 1482        | 0.31         | 1                | 536        | 9          | 956        | 0.169        |
| 0008289 | lipid binding                                                 | 10                    | 1492        | 16            | 1471        | 0.312        | 3                | 534        | 7          | 958        | 0.96         |
| 0003676 | nucleic acid binding                                          | 177                   | 1325        | 212           | 1275        | 0.051        | <b>47</b>        | <b>490</b> | <b>130</b> | <b>835</b> | <b>0.008</b> |
| 0003677 | DNA binding                                                   | 85                    | 1417        | 109           | 1378        | 0.075        | 27               | 510        | 58         | 907        | 0.501        |
| 0003682 | chromatin binding                                             | 16                    | 1486        | 7             | 1480        | 0.099        | 4                | 533        | 12         | 953        | 0.522        |
| 0003700 | transcription factor activity                                 | 36                    | 1466        | 50            | 1437        | 0.142        | 16               | 521        | 20         | 945        | 0.355        |
| 0003723 | RNA binding                                                   | 58                    | 1444        | 61            | 1426        | 0.808        | <b>10</b>        | <b>527</b> | <b>48</b>  | <b>917</b> | <b>0.004</b> |
| 0008135 | translation factor activity, nucleic acid binding             | 20                    | 1482        | 15            | 1472        | 0.516        | 5                | 532        | 15         | 950        | 0.438        |
| 0000166 | nucleotide binding                                            | 136                   | 1366        | 119           | 1368        | 0.335        | 42               | 495        | 94         | 871        | 0.251        |
| 0005515 | protein binding                                               | 185                   | 1317        | 194           | 1293        | 0.586        | <b>41</b>        | <b>496</b> | <b>144</b> | <b>821</b> | <b>5E-05</b> |
| 0008134 | transcription factor binding                                  | 15                    | 1487        | 16            | 1471        | 0.978        | 1                | 536        | 14         | 951        | 0.036        |
| 0008092 | cytoskeletal protein binding                                  | 43                    | 1459        | 45            | 1442        | 0.876        | 11               | 526        | 32         | 933        | 0.211        |
| 0003779 | actin binding                                                 | 30                    | 1472        | 23            | 1464        | 0.427        | 8                | 529        | 22         | 943        | 0.392        |
| 0003824 | catalytic activity                                            | 446                   | 1056        | 393           | 1094        | 0.052        | 159              | 378        | 287        | 678        | 0.996        |
| 0016787 | hydrolase activity                                            | <b>207</b>            | <b>1295</b> | <b>165</b>    | <b>1322</b> | <b>0.03</b>  | 67               | 470        | 140        | 825        | 0.309        |
| 0003924 | GTPase activity                                               | <b>29</b>             | <b>1473</b> | <b>11</b>     | <b>1476</b> | <b>0.007</b> | 11               | 526        | 18         | 947        | 0.959        |
| 0004518 | nuclease activity                                             | 5                     | 1497        | 10            | 1477        | 0.291        | 0                | 537        | 5          | 960        | 0.229        |

## PC7

| GO#     | GO term                                    | Representational bias |             |               |             |              | Directional bias |            |            |            |              |
|---------|--------------------------------------------|-----------------------|-------------|---------------|-------------|--------------|------------------|------------|------------|------------|--------------|
|         |                                            | regulated             |             | not regulated |             | $\rho$       | up-reg.          |            | down-reg.  |            | $\rho$       |
|         |                                            | term                  | n.term      | term          | n.term      |              | term             | n.term     | term       | n.term     |              |
| 0008233 | peptidase activity                         | 62                    | 1440        | 56            | 1431        | 0.679        | 18               | 519        | 44         | 921        | 0.321        |
| 0004721 | phosphoprotein phosphatase activity        | 17                    | 1485        | 13            | 1474        | 0.601        | 2                | 535        | 15         | 950        | 0.069        |
| 0016740 | transferase activity                       | 120                   | 1382        | 121           | 1366        | 0.935        | 39               | 498        | 81         | 884        | 0.499        |
| 0016301 | kinase activity                            | 74                    | 1428        | 61            | 1426        | 0.319        | 22               | 515        | 52         | 913        | 0.325        |
| 0004672 | protein kinase activity                    | 48                    | 1454        | 47            | 1440        | 0.96         | 14               | 523        | 34         | 931        | 0.415        |
| 0030234 | enzyme regulator activity                  | 53                    | 1449        | 52            | 1435        | 0.958        | 18               | 519        | 35         | 930        | 0.896        |
| 0003774 | motor activity                             | 15                    | 1487        | 13            | 1474        | 0.87         | 7                | 530        | 8          | 957        | 0.538        |
| 0004871 | signal transducer activity                 | 133                   | 1369        | 123           | 1364        | 0.614        | 53               | 484        | 80         | 885        | 0.348        |
| 0004872 | receptor activity                          | 54                    | 1448        | 55            | 1432        | 0.957        | <b>29</b>        | <b>508</b> | <b>25</b>  | <b>940</b> | <b>0.008</b> |
| 0004879 | ligand-dependent nuclear receptor activity | 4                     | 1498        | 5             | 1482        | 0.988        | 2                | 535        | 2          | 963        | 0.942        |
| 0004888 | transmembrane receptor activity            | 36                    | 1466        | 38            | 1449        | 0.872        | 18               | 519        | 18         | 947        | 0.103        |
| 0004930 | G-protein coupled receptor activity        | 15                    | 1487        | 15            | 1472        | 0.876        | 8                | 529        | 7          | 958        | 0.247        |
| 0005057 | receptor signaling protein activity        | 35                    | 1467        | 45            | 1442        | 0.287        | 10               | 527        | 25         | 940        | 0.472        |
| 0005102 | receptor binding                           | 34                    | 1468        | 35            | 1452        | 0.966        | 11               | 526        | 23         | 942        | 0.812        |
| 0005198 | structural molecule activity               | 79                    | 1423        | 83            | 1404        | 0.758        | 27               | 510        | 52         | 913        | 0.858        |
| 0030528 | transcription regulator activity           | 96                    | 1406        | 103           | 1384        | 0.608        | 26               | 511        | 70         | 895        | 0.085        |
| 0045182 | translation regulator activity             | 20                    | 1482        | 15            | 1472        | 0.516        | 5                | 532        | 15         | 950        | 0.438        |
| 0005215 | transporter activity                       | 128                   | 1374        | 125           | 1362        | 0.962        | <b>62</b>        | <b>475</b> | <b>66</b>  | <b>899</b> | <b>0.002</b> |
| 0005489 | electron transporter activity              | 16                    | 1486        | 13            | 1474        | 0.729        | 7                | 530        | 9          | 956        | 0.683        |
| 0005216 | ion channel activity                       | 24                    | 1478        | 28            | 1459        | 0.648        | <b>14</b>        | <b>523</b> | <b>10</b>  | <b>955</b> | <b>0.035</b> |
| 0005244 | voltage-gated ion channel activity         | 10                    | 1492        | 16            | 1471        | 0.312        | 5                | 532        | 5          | 960        | 0.54         |
| 0005575 | cellular_component                         | 608                   | 894         | 615           | 872         | 0.652        | 204              | 333        | 404        | 561        | 0.158        |
| 0005623 | cell                                       | 550                   | 952         | 562           | 925         | 0.53         | 188              | 349        | 362        | 603        | 0.363        |
| 0005622 | intracellular                              | 428                   | 1074        | 429           | 1058        | 0.862        | <b>136</b>       | <b>401</b> | <b>292</b> | <b>673</b> | <b>0.049</b> |
| 0005737 | cytoplasm                                  | 240                   | 1262        | 218           | 1269        | 0.342        | 84               | 453        | 156        | 809        | 0.848        |
| 0016023 | cytoplasmic vesicle                        | 20                    | 1482        | 21            | 1466        | 0.974        | 8                | 529        | 12         | 953        | 0.87         |
| 0005829 | cytosol                                    | 42                    | 1460        | 37            | 1450        | 0.681        | 9                | 528        | 33         | 932        | 0.072        |
| 0005783 | endoplasmic reticulum                      | <b>37</b>             | <b>1465</b> | <b>20</b>     | <b>1467</b> | <b>0.036</b> | <b>4</b>         | <b>533</b> | <b>33</b>  | <b>932</b> | <b>0.002</b> |
| 0005794 | Golgi apparatus                            | 12                    | 1490        | 13            | 1474        | 0.98         | 2                | 535        | 10         | 955        | 0.279        |
| 0005815 | microtubule organizing center              | 3                     | 1499        | 6             | 1481        | 0.495        | 0                | 537        | 3          | 962        | 0.49         |
| 0005739 | mitochondrion                              | 55                    | 1447        | 50            | 1437        | 0.73         | <b>35</b>        | <b>502</b> | <b>20</b>  | <b>945</b> | <b>2E-05</b> |
| 0005840 | ribosome                                   | 9                     | 1493        | 15            | 1472        | 0.294        | 4                | 533        | 5          | 960        | 0.844        |
| 0005773 | vacuole                                    | 7                     | 1495        | 7             | 1480        | 0.803        | 4                | 533        | 3          | 962        | 0.43         |
| 0005764 | lysosome                                   | 2                     | 1500        | 3             | 1484        | 0.991        | 0                | 537        | 2          | 963        | 0.751        |
| 0005856 | cytoskeleton                               | 38                    | 1464        | 47            | 1440        | 0.354        | 11               | 526        | 27         | 938        | 0.475        |
| 0005694 | chromosome                                 | 24                    | 1478        | 16            | 1471        | 0.279        | 7                | 530        | 17         | 948        | 0.643        |
| 0000228 | nuclear chromosome                         | 1                     | 1501        | 4             | 1483        | 0.365        | 1                | 536        | 0          | 965        | 0.766        |
| 0005634 | nucleus                                    | 180                   | 1322        | 192           | 1295        | 0.476        | <b>44</b>        | <b>493</b> | <b>136</b> | <b>829</b> | <b>1E-03</b> |
| 0005635 | nuclear membrane                           | 11                    | 1491        | 6             | 1481        | 0.341        | 1                | 536        | 10         | 955        | 0.125        |
| 0005730 | nucleolus                                  | 2                     | 1500        | 9             | 1478        | 0.067        | 0                | 537        | 2          | 963        | 0.751        |
| 0005654 | nucleoplasm                                | 35                    | 1467        | 37            | 1450        | 0.871        | 13               | 524        | 22         | 943        | 0.996        |
| 0005777 | peroxisome                                 | 6                     | 1496        | 3             | 1484        | 0.514        | 1                | 536        | 5          | 960        | 0.582        |
| 0005886 | plasma membrane                            | 84                    | 1418        | 72            | 1415        | 0.401        | 35               | 502        | 49         | 916        | 0.295        |
| 0005576 | extracellular region                       | 42                    | 1460        | 34            | 1453        | 0.442        | 17               | 520        | 25         | 940        | 0.628        |
| 0005578 | extracellular matrix (sensu Metazoa)       | 21                    | 1481        | 14            | 1473        | 0.322        | 12               | 525        | 9          | 956        | 0.067        |

| GO#     | GO term                                                                           | Representational bias |             |               |             |              | Directional bias |            |            |            |              |
|---------|-----------------------------------------------------------------------------------|-----------------------|-------------|---------------|-------------|--------------|------------------|------------|------------|------------|--------------|
|         |                                                                                   | regulated             |             | not regulated |             | $\rho$       | up-reg.          |            | down-reg.  |            | $\rho$       |
|         |                                                                                   | term                  | n.term      | term          | n.term      |              | term             | n.term     | term       | n.term     |              |
| 0008150 | biological_process                                                                | 955                   | 620         | 799           | 615         | 0.024        | <b>324</b>       | <b>289</b> | <b>631</b> | <b>331</b> | <b>6E-07</b> |
| 0007610 | behavior                                                                          | <b>71</b>             | <b>1504</b> | <b>91</b>     | <b>1323</b> | <b>0.025</b> | 25               | 588        | 46         | 916        | 0.595        |
| 0030534 | adult behavior                                                                    | 12                    | 1563        | 12            | 1402        | 0.952        | 4                | 609        | 8          | 954        | 0.919        |
| 0030537 | larval behavior                                                                   | 7                     | 1568        | 2             | 1412        | 0.24         | 4                | 609        | 3          | 959        | 0.547        |
| 0007611 | learning and/or memory                                                            | 11                    | 1564        | 13            | 1401        | 0.638        | 6                | 607        | 5          | 957        | 0.449        |
| 0007612 | learning                                                                          | 6                     | 1569        | 9             | 1405        | 0.467        | 3                | 610        | 3          | 959        | 0.89         |
| 0007613 | memory                                                                            | 4                     | 1571        | 7             | 1407        | 0.433        | 1                | 612        | 3          | 959        | 0.953        |
| 0007626 | locomotory behavior                                                               | <b>50</b>             | <b>1525</b> | <b>73</b>     | <b>1341</b> | <b>0.008</b> | 19               | 594        | 31         | 931        | 0.991        |
| 0007635 | chemosensory behavior                                                             | 7                     | 1568        | 11            | 1403        | 0.347        | 2                | 611        | 5          | 957        | 0.862        |
| 0007622 | rhythmic behavior                                                                 | 10                    | 1565        | 5             | 1409        | 0.408        | 2                | 611        | 8          | 954        | 0.365        |
| 0048512 | circadian behavior                                                                | 9                     | 1566        | 5             | 1409        | 0.547        | 2                | 611        | 7          | 955        | 0.492        |
| 0009987 | cellular process                                                                  | 879                   | 696         | 749           | 665         | 0.129        | <b>298</b>       | <b>315</b> | <b>581</b> | <b>381</b> | <b>6E-06</b> |
| 0007154 | cell communication                                                                | <b>235</b>            | <b>1340</b> | <b>254</b>    | <b>1160</b> | <b>0.028</b> | <b>116</b>       | <b>497</b> | <b>119</b> | <b>843</b> | <b>5E-04</b> |
| 0007155 | cell adhesion                                                                     | <b>32</b>             | <b>1543</b> | <b>58</b>     | <b>1356</b> | <b>0.001</b> | 17               | 596        | 15         | 947        | 0.138        |
| 0008037 | cell recognition                                                                  | 1                     | 1574        | 1             | 1413        | 0.527        | 0                | 613        | 1          | 961        | 0.82         |
| 0008038 | neuronal cell recognition                                                         | 1                     | 1574        | 1             | 1413        | 0.527        | 0                | 613        | 1          | 961        | 0.82         |
| 0016337 | cell-cell adhesion                                                                | <b>13</b>             | <b>1562</b> | <b>26</b>     | <b>1388</b> | <b>0.023</b> | <b>10</b>        | <b>603</b> | <b>3</b>   | <b>959</b> | <b>0.011</b> |
| 0016339 | calcium-dependent cell-cell adhesion                                              | 1                     | 1574        | 6             | 1408        | 0.097        | 1                | 612        | 0          | 962        | 0.82         |
| 0007156 | homophilic cell adhesion                                                          | 2                     | 1573        | 7             | 1407        | 0.134        | 1                | 612        | 1          | 961        | 0.686        |
| 0007160 | cell-matrix adhesion                                                              | 3                     | 1572        | 6             | 1408        | 0.406        | 3                | 610        | 0          | 962        | 0.114        |
| 0007267 | cell-cell signaling                                                               | 73                    | 1502        | 83            | 1331        | 0.152        | <b>39</b>        | <b>574</b> | <b>34</b>  | <b>928</b> | <b>0.013</b> |
| 0019226 | transmission of nerve impulse                                                     | 68                    | 1507        | 70            | 1344        | 0.462        | <b>38</b>        | <b>575</b> | <b>30</b>  | <b>932</b> | <b>0.005</b> |
| 0007268 | synaptic transmission                                                             | 48                    | 1527        | 53            | 1361        | 0.339        | <b>28</b>        | <b>585</b> | <b>20</b>  | <b>942</b> | <b>0.008</b> |
| 0007270 | nerve-nerve synaptic transmission                                                 | 10                    | 1565        | 6             | 1408        | 0.591        | 6                | 607        | 4          | 958        | 0.295        |
| 0001505 | regulation of neurotransmitter levels                                             | 28                    | 1547        | 32            | 1382        | 0.416        | 15               | 598        | 13         | 949        | 0.159        |
| 0042133 | neurotransmitter metabolism                                                       | 5                     | 1570        | 3             | 1411        | 0.84         | 4                | 609        | 1          | 961        | 0.153        |
| 0007269 | neurotransmitter secretion                                                        | 24                    | 1551        | 29            | 1385        | 0.341        | 11               | 602        | 13         | 949        | 0.625        |
| 0007165 | signal transduction                                                               | 192                   | 1383        | 187           | 1227        | 0.427        | <b>89</b>        | <b>524</b> | <b>103</b> | <b>859</b> | <b>0.03</b>  |
| 0007166 | cell surface receptor linked signal transduction                                  | 75                    | 1500        | 82            | 1332        | 0.235        | 31               | 582        | 44         | 918        | 0.751        |
| 0007167 | enzyme linked receptor protein signaling pathway                                  | 20                    | 1555        | 26            | 1388        | 0.266        | 8                | 605        | 12         | 950        | 0.896        |
| 0007178 | transmembrane receptor protein serine/threonine kinase signaling pathway          | 10                    | 1565        | 6             | 1408        | 0.591        | 1                | 612        | 9          | 953        | 0.12         |
| 0007179 | transforming growth factor beta receptor signaling pathway                        | 5                     | 1570        | 4             | 1410        | 0.871        | 0                | 613        | 5          | 957        | 0.184        |
| 0007169 | transmembrane receptor protein tyrosine kinase signaling pathway                  | <b>10</b>             | <b>1565</b> | <b>22</b>     | <b>1392</b> | <b>0.024</b> | 7                | 606        | 3          | 959        | 0.09         |
| 0007173 | epidermal growth factor receptor signaling pathway                                | 1                     | 1574        | 7             | 1407        | 0.054        | 1                | 612        | 0          | 962        | 0.82         |
| 0008286 | insulin receptor signaling pathway                                                | 2                     | 1573        | 2             | 1412        | 0.694        | 1                | 612        | 1          | 961        | 0.686        |
| 0008293 | torso signaling pathway                                                           | 3                     | 1572        | 4             | 1410        | 0.886        | 1                | 612        | 2          | 960        | 0.694        |
| 0007186 | G-protein coupled receptor protein signaling pathway                              | 34                    | 1541        | 37            | 1377        | 0.484        | 17               | 596        | 17         | 945        | 0.245        |
| 0007200 | G-protein signaling, coupled to IP3 second messenger (phospholipase C activating) | 3                     | 1572        | 2             | 1412        | 0.904        | 1                | 612        | 2          | 960        | 0.694        |
| 0007219 | Notch signaling pathway                                                           | 6                     | 1569        | 7             | 1407        | 0.845        | 1                | 612        | 5          | 957        | 0.483        |
| 0007224 | smoothed signaling pathway                                                        | 5                     | 1570        | 1             | 1413        | 0.273        | 1                | 612        | 4          | 958        | 0.682        |
| 0008063 | Toll signaling pathway                                                            | 3                     | 1572        | 1             | 1413        | 0.694        | 1                | 612        | 2          | 960        | 0.694        |
| 0016055 | Wnt receptor signaling pathway                                                    | <b>4</b>              | <b>1571</b> | <b>12</b>     | <b>1402</b> | <b>0.048</b> | 2                | 611        | 2          | 960        | 0.953        |
| 0007242 | intracellular signaling cascade                                                   | 87                    | 1488        | 95            | 1319        | 0.198        | 40               | 573        | 47         | 915        | 0.202        |
| 0007263 | nitric oxide mediated signal transduction                                         | 0                     | 1575        | 4             | 1410        | 0.107        | 0                | 613        | 0          | 962        | -            |
| 0007243 | protein kinase cascade                                                            | 19                    | 1556        | 22            | 1392        | 0.507        | 8                | 605        | 11         | 951        | 0.96         |
| 0007259 | JAK-STAT cascade                                                                  | 3                     | 1572        | 3             | 1411        | 0.782        | 0                | 613        | 3          | 959        | 0.429        |
| 0000165 | MAPKKK cascade                                                                    | 16                    | 1559        | 17            | 1397        | 0.755        | 8                | 605        | 8          | 954        | 0.512        |
| 0019932 | second-messenger-mediated signaling                                               | 14                    | 1561        | 8             | 1406        | 0.414        | 6                | 607        | 8          | 954        | 0.978        |
| 0019722 | calcium-mediated signaling                                                        | 11                    | 1564        | 4             | 1410        | 0.178        | 5                | 608        | 6          | 956        | 0.892        |
| 0048015 | phosphoinositide-mediated signaling                                               | 3                     | 1572        | 2             | 1412        | 0.904        | 1                | 612        | 2          | 960        | 0.694        |
| 0007264 | small GTPase mediated signal transduction                                         | 22                    | 1553        | 22            | 1392        | 0.835        | 8                | 605        | 14         | 948        | 0.978        |
| 0007265 | Ras protein signal transduction                                                   | 4                     | 1571        | 6             | 1408        | 0.625        | 2                | 611        | 2          | 960        | 0.953        |
| 0009966 | regulation of signal transduction                                                 | 16                    | 1559        | 18            | 1396        | 0.625        | 7                | 606        | 9          | 953        | 0.888        |
| 0007275 | development                                                                       | 232                   | 1343        | 228           | 1186        | 0.315        | 80               | 533        | 152        | 810        | 0.153        |
| 0007568 | aging                                                                             | 8                     | 1567        | 3             | 1411        | 0.303        | 2                | 611        | 6          | 956        | 0.656        |
| 0030154 | cell differentiation                                                              | 54                    | 1521        | 65            | 1349        | 0.124        | 18               | 595        | 36         | 926        | 0.475        |
| 0048468 | cell development                                                                  | 33                    | 1542        | 42            | 1372        | 0.159        | 9                | 604        | 24         | 938        | 0.228        |
| 0000904 | cellular morphogenesis during differentiation                                     | 8                     | 1567        | 11            | 1403        | 0.486        | 3                | 610        | 5          | 957        | 0.779        |
| 0042461 | photoreceptor cell development                                                    | 8                     | 1567        | 10            | 1404        | 0.641        | 3                | 610        | 5          | 957        | 0.779        |
| 0042051 | eye photoreceptor development (sensu Endopterygota)                               | 7                     | 1568        | 10            | 1404        | 0.478        | 3                | 610        | 4          | 958        | 0.862        |
| 0045165 | cell fate commitment                                                              | 19                    | 1556        | 30            | 1384        | 0.068        | 7                | 606        | 12         | 950        | 0.96         |

| GO#     | GO term                                                        | Representational bias |             |               |             |              | Directional bias |            |            |            |              |
|---------|----------------------------------------------------------------|-----------------------|-------------|---------------|-------------|--------------|------------------|------------|------------|------------|--------------|
|         |                                                                | regulated             |             | not regulated |             | $\rho$       | up-reg.          |            | down-reg.  |            | $\rho$       |
|         |                                                                | term                  | n.term      | term          | n.term      |              | term             | n.term     | term       | n.term     |              |
| 0001709 | cell fate determination                                        | 12                    | 1563        | 18            | 1396        | 0.224        | 5                | 608        | 7          | 955        | 0.919        |
| 0007400 | neuroblast cell fate determination                             | 4                     | 1571        | 4             | 1410        | 0.84         | 2                | 611        | 2          | 960        | 0.953        |
| 0001708 | cell fate specification                                        | 3                     | 1572        | 5             | 1409        | 0.612        | 1                | 612        | 2          | 960        | 0.694        |
| 0007349 | cellularization                                                | 6                     | 1569        | 5             | 1409        | 0.858        | 1                | 612        | 5          | 957        | 0.483        |
| 0040007 | growth                                                         | 17                    | 1558        | 19            | 1395        | 0.622        | 3                | 610        | 14         | 948        | 0.119        |
| 0002164 | larval development                                             | 9                     | 1566        | 8             | 1406        | 0.823        | 1                | 612        | 8          | 954        | 0.17         |
| 0002165 | larval or pupal development (sensu Insecta)                    | 66                    | 1509        | 63            | 1351        | 0.79         | 15               | <b>598</b> | 51         | <b>911</b> | <b>0.009</b> |
| 0007552 | metamorphosis                                                  | 61                    | 1514        | 60            | 1354        | 0.675        | <b>14</b>        | <b>599</b> | <b>47</b>  | <b>915</b> | <b>0.013</b> |
| 0009653 | morphogenesis                                                  | 158                   | 1417        | 161           | 1253        | 0.255        | 56               | 557        | 102        | 860        | 0.39         |
| 0002009 | morphogenesis of an epithelium                                 | 20                    | 1555        | 24            | 1390        | 0.414        | 2                | <b>611</b> | 18         | <b>944</b> | <b>0.015</b> |
| 0009887 | organogenesis                                                  | 137                   | 1438        | 145           | 1269        | 0.164        | 53               | 560        | 84         | 878        | 0.974        |
| 0001654 | eye morphogenesis                                              | 25                    | 1550        | 32            | 1382        | 0.224        | 7                | 606        | 18         | 944        | 0.356        |
| 0008406 | gonad development                                              | 3                     | 1572        | 8             | 1406        | 0.165        | 1                | 612        | 2          | 960        | 0.694        |
| 0007444 | imaginal disc development                                      | <b>37</b>             | <b>1538</b> | <b>56</b>     | <b>1358</b> | <b>0.015</b> | 9                | 604        | 28         | 934        | 0.094        |
| 0007494 | midgut development                                             | 4                     | 1571        | 1             | 1413        | 0.438        | 3                | 610        | 1          | 961        | 0.333        |
| 0007517 | muscle development                                             | 19                    | 1556        | 15            | 1399        | 0.84         | 8                | 605        | 11         | 951        | 0.96         |
| 0007399 | neurogenesis                                                   | <b>70</b>             | <b>1505</b> | <b>92</b>     | <b>1322</b> | <b>0.016</b> | 30               | 583        | 40         | 922        | 0.572        |
| 0007409 | axonogenesis                                                   | <b>15</b>             | <b>1560</b> | <b>28</b>     | <b>1386</b> | <b>0.028</b> | 5                | 608        | 10         | 952        | 0.857        |
| 0007411 | axon guidance                                                  | <b>10</b>             | <b>1565</b> | <b>23</b>     | <b>1391</b> | <b>0.016</b> | 3                | 610        | 7          | 955        | 0.799        |
| 0007417 | central nervous system development                             | 19                    | 1556        | 20            | 1394        | 0.735        | 9                | 604        | 10         | 952        | 0.601        |
| 0016358 | dendrite morphogenesis                                         | 5                     | 1570        | 9             | 1405        | 0.314        | 2                | 611        | 3          | 959        | 0.682        |
| 0042063 | gliogenesis                                                    | 4                     | 1571        | 7             | 1407        | 0.433        | 3                | 610        | 1          | 961        | 0.333        |
| 0007422 | peripheral nervous system development                          | 18                    | 1557        | 22            | 1392        | 0.411        | 6                | 607        | 12         | 950        | 0.806        |
| 0050767 | regulation of neurogenesis                                     | 3                     | 1572        | 2             | 1412        | 0.904        | 1                | 612        | 2          | 960        | 0.694        |
| 0007424 | tracheal system development (sensu Insecta)                    | 21                    | 1554        | 16            | 1398        | 0.74         | 6                | 607        | 15         | 947        | 0.451        |
| 0048513 | organ development                                              | 140                   | 1435        | 146           | 1268        | 0.204        | 55               | 558        | 85         | 877        | 0.998        |
| 0007389 | pattern specification                                          | <b>31</b>             | <b>1544</b> | <b>45</b>     | <b>1369</b> | <b>0.047</b> | 9                | 604        | 22         | 940        | 0.34         |
| 0048066 | pigmentation                                                   | 6                     | 1569        | 5             | 1409        | 0.858        | 4                | 609        | 2          | 960        | 0.329        |
| 0009791 | post-embryonic development                                     | 9                     | 1566        | 8             | 1406        | 0.823        | 1                | 612        | 8          | 954        | 0.17         |
| 0009790 | embryonic development                                          | 46                    | 1529        | 54            | 1360        | 0.207        | 15               | 598        | 31         | 931        | 0.461        |
| 0007530 | sex determination                                              | 3                     | 1572        | 7             | 1407        | 0.262        | 1                | 612        | 2          | 960        | 0.694        |
| 0007548 | sex differentiation                                            | 8                     | 1567        | 11            | 1403        | 0.486        | 3                | 610        | 5          | 957        | 0.779        |
| 0019827 | stem cell maintenance                                          | 3                     | 1572        | 5             | 1409        | 0.612        | 0                | 613        | 3          | 959        | 0.429        |
| 0000003 | reproduction                                                   | 67                    | 1508        | 77            | 1337        | 0.152        | 18               | 595        | 49         | 913        | 0.052        |
| 0050793 | regulation of development                                      | 20                    | 1555        | 23            | 1391        | 0.507        | 5                | 608        | 15         | 947        | 0.292        |
| 0007582 | physiological process                                          | <b>873</b>            | <b>702</b>  | <b>732</b>    | <b>682</b>  | <b>0.049</b> | <b>291</b>       | <b>322</b> | <b>582</b> | <b>380</b> | <b>5E-07</b> |
| 0008152 | metabolism                                                     | 635                   | 940         | 531           | 883         | 0.131        | <b>195</b>       | <b>418</b> | <b>440</b> | <b>522</b> | <b>5E-08</b> |
| 0009056 | catabolism                                                     | 121                   | 1454        | 88            | 1326        | 0.136        | <b>34</b>        | <b>579</b> | <b>87</b>  | <b>875</b> | <b>0.015</b> |
| 0006091 | energy pathways                                                | <b>72</b>             | <b>1503</b> | <b>36</b>     | <b>1378</b> | <b>0.004</b> | 22               | 591        | 50         | 912        | 0.172        |
| 0006118 | electron transport                                             | 36                    | 1539        | 19            | 1395        | 0.076        | 9                | 604        | 27         | 935        | 0.119        |
| 0006139 | nucleobase, nucleoside, nucleotide and nucleic acid metabolism | 222                   | 1353        | 210           | 1204        | 0.593        | <b>67</b>        | <b>546</b> | <b>155</b> | <b>807</b> | <b>0.005</b> |
| 0006259 | DNA metabolism                                                 | 39                    | 1536        | 40            | 1374        | 0.627        | 14               | 599        | 25         | 937        | 0.821        |
| 0006350 | transcription                                                  | <b>103</b>            | <b>1472</b> | <b>124</b>    | <b>1290</b> | <b>0.026</b> | 37               | 576        | 66         | 896        | 0.588        |
| 0043170 | macromolecule metabolism                                       | <b>357</b>            | <b>1218</b> | <b>271</b>    | <b>1143</b> | <b>0.021</b> | <b>89</b>        | <b>524</b> | <b>268</b> | <b>694</b> | <b>1E-09</b> |
| 0019538 | protein metabolism                                             | 296                   | 1279        | 231           | 1183        | 0.087        | <b>75</b>        | <b>538</b> | <b>221</b> | <b>741</b> | <b>2E-07</b> |
| 0006412 | protein biosynthesis                                           | <b>73</b>             | <b>1502</b> | <b>37</b>     | <b>1377</b> | <b>0.005</b> | <b>12</b>        | <b>601</b> | <b>61</b>  | <b>901</b> | <b>9E-05</b> |
| 0006464 | protein modification                                           | 120                   | 1455        | 136           | 1278        | 0.06         | 37               | 576        | 83         | 879        | 0.073        |
| 0006457 | protein folding                                                | 27                    | 1548        | 16            | 1398        | 0.237        | <b>3</b>         | <b>610</b> | <b>24</b>  | <b>938</b> | <b>0.005</b> |
| 0005975 | carbohydrate metabolism                                        | 66                    | 1509        | 41            | 1373        | 0.072        | <b>17</b>        | <b>596</b> | <b>49</b>  | <b>913</b> | <b>0.035</b> |
| 0006519 | amino acid and derivative metabolism                           | 41                    | 1534        | 29            | 1385        | 0.381        | 16               | 597        | 25         | 937        | 0.882        |
| 0006629 | lipid metabolism                                               | 50                    | 1525        | 39            | 1375        | 0.575        | 18               | 595        | 32         | 930        | 0.777        |
| 0009308 | amine metabolism                                               | 46                    | 1529        | 35            | 1379        | 0.525        | 17               | 596        | 29         | 933        | 0.901        |
| 0042440 | pigment metabolism                                             | 7                     | 1568        | 5             | 1409        | 0.918        | 3                | 610        | 4          | 958        | 0.862        |
| 0042445 | hormone metabolism                                             | 4                     | 1571        | 3             | 1411        | 0.886        | 2                | 611        | 2          | 960        | 0.953        |
| 0009058 | biosynthesis                                                   | <b>126</b>            | <b>1449</b> | <b>78</b>     | <b>1336</b> | <b>0.009</b> | <b>33</b>        | <b>580</b> | <b>93</b>  | <b>869</b> | <b>0.003</b> |
| 0019748 | secondary metabolism                                           | 8                     | 1567        | 6             | 1408        | 0.947        | 3                | 610        | 5          | 957        | 0.779        |
| 0019222 | regulation of metabolism                                       | 117                   | 1458        | 121           | 1293        | 0.284        | 37               | 576        | 80         | 882        | 0.113        |
| 0016265 | death                                                          | 49                    | 1526        | 37            | 1377        | 0.485        | <b>11</b>        | <b>602</b> | <b>38</b>  | <b>924</b> | <b>0.024</b> |
| 0008219 | cell death                                                     | 41                    | 1534        | 33            | 1381        | 0.722        | <b>9</b>         | <b>604</b> | <b>32</b>  | <b>930</b> | <b>0.036</b> |
| 0016271 | tissue death                                                   | 18                    | 1557        | 9             | 1405        | 0.205        | 3                | 610        | 15         | 947        | 0.088        |
| 0042592 | homeostasis                                                    | 16                    | 1559        | 13            | 1401        | 0.935        | 8                | 605        | 8          | 954        | 0.512        |
| 0019725 | cell homeostasis                                               | 15                    | 1560        | 11            | 1403        | 0.752        | 7                | 606        | 8          | 954        | 0.725        |
| 0050801 | ion homeostasis                                                | 10                    | 1565        | 4             | 1410        | 0.255        | 7                | 606        | 3          | 959        | 0.09         |
| 0043062 | extracellular structure organization and biogenesis            | 10                    | 1565        | 9             | 1405        | 0.822        | 4                | 609        | 6          | 956        | 0.799        |
| 0046903 | secretion                                                      | 58                    | 1517        | 43            | 1371        | 0.386        | 16               | 597        | 42         | 920        | 0.096        |
| 0048511 | rhythmic process                                               | 11                    | 1564        | 6             | 1408        | 0.452        | 2                | 611        | 9          | 953        | 0.269        |

| GO#     | GO term                                                       | Representational bias |             |               |             |              | Directional bias |            |            |            |              |
|---------|---------------------------------------------------------------|-----------------------|-------------|---------------|-------------|--------------|------------------|------------|------------|------------|--------------|
|         |                                                               | regulated             |             | not regulated |             | $\rho$       | up-reg.          |            | down-reg.  |            | $\rho$       |
|         |                                                               | term                  | n.term      | term          | n.term      |              | term             | n.term     | term       | n.term     |              |
| 0050791 | regulation of physiological process                           | <b>165</b>            | <b>1410</b> | <b>182</b>    | <b>1232</b> | <b>0.047</b> | <b>49</b>        | <b>564</b> | <b>116</b> | <b>846</b> | <b>0.013</b> |
| 0050874 | organismal physiological process                              | 121                   | 1454        | 111           | 1303        | 0.918        | <b>64</b>        | <b>549</b> | <b>57</b>  | <b>905</b> | <b>0.001</b> |
| 0050875 | cellular physiological process                                | 826                   | 749         | 693           | 721         | 0.066        | <b>271</b>       | <b>342</b> | <b>555</b> | <b>407</b> | <b>2E-07</b> |
| 0006810 | transport                                                     | <b>230</b>            | <b>1345</b> | <b>168</b>    | <b>1246</b> | <b>0.033</b> | <b>104</b>       | <b>509</b> | <b>126</b> | <b>836</b> | <b>0.041</b> |
| 0006811 | ion transport                                                 | 71                    | 1504        | 49            | 1365        | 0.175        | <b>54</b>        | <b>559</b> | <b>17</b>  | <b>945</b> | <b>1E-10</b> |
| 0006818 | hydrogen transport                                            | 10                    | 1565        | 8             | 1406        | 0.994        | 6                | 607        | 4          | 958        | 0.295        |
| 0006836 | neurotransmitter transport                                    | 3                     | 1572        | 2             | 1412        | 0.904        | 3                | 610        | 0          | 962        | 0.114        |
| 0006858 | extracellular transport                                       | 10                    | 1565        | 5             | 1409        | 0.408        | 6                | 607        | 4          | 958        | 0.295        |
| 0006869 | lipid transport                                               | 8                     | 1567        | 8             | 1406        | 0.972        | 2                | 611        | 6          | 956        | 0.656        |
| 0008643 | carbohydrate transport                                        | 8                     | 1567        | 7             | 1407        | 0.834        | 3                | 610        | 5          | 957        | 0.779        |
| 0015031 | protein transport                                             | 107                   | 1468        | 73            | 1341        | 0.073        | <b>31</b>        | <b>582</b> | <b>76</b>  | <b>886</b> | <b>0.037</b> |
| 0015837 | amine transport                                               | 5                     | 1570        | 7             | 1407        | 0.633        | 3                | 610        | 2          | 960        | 0.611        |
| 0015931 | nucleobase, nucleoside, nucleotide and nucleic acid transport | 8                     | 1567        | 5             | 1409        | 0.718        | 3                | 610        | 5          | 957        | 0.779        |
| 0016192 | vesicle-mediated transport                                    | 65                    | 1510        | 54            | 1360        | 0.737        | 22               | 591        | 43         | 919        | 0.467        |
| 0045045 | secretory pathway                                             | 54                    | 1521        | 41            | 1373        | 0.472        | 15               | 598        | 39         | 923        | 0.117        |
| 0046907 | intracellular transport                                       | 114                   | 1461        | 84            | 1330        | 0.177        | <b>31</b>        | <b>582</b> | <b>83</b>  | <b>879</b> | <b>0.01</b>  |
| 0051049 | regulation of transport                                       | 8                     | 1567        | 10            | 1404        | 0.641        | 2                | 611        | 6          | 956        | 0.656        |
| 0008283 | cell proliferation                                            | <b>27</b>             | <b>1548</b> | <b>44</b>     | <b>1370</b> | <b>0.017</b> | 10               | 603        | 17         | 945        | 0.997        |
| 0007049 | cell cycle                                                    | <b>56</b>             | <b>1519</b> | <b>72</b>     | <b>1342</b> | <b>0.048</b> | <b>14</b>        | <b>599</b> | <b>42</b>  | <b>920</b> | <b>0.042</b> |
| 0017145 | stem cell division                                            | 7                     | 1568        | 5             | 1409        | 0.918        | 1                | 612        | 6          | 956        | 0.341        |
| 0016043 | cell organization and biogenesis                              | <b>128</b>            | <b>1447</b> | <b>147</b>    | <b>1267</b> | <b>0.038</b> | 41               | 572        | 87         | 875        | 0.116        |
| 0000902 | cellular morphogenesis                                        | 36                    | 1539        | 44            | 1370        | 0.199        | 9                | 604        | 27         | 935        | 0.119        |
| 0006996 | organelle organization and biogenesis                         | <b>110</b>            | <b>1465</b> | <b>128</b>    | <b>1286</b> | <b>0.044</b> | <b>32</b>        | <b>581</b> | <b>78</b>  | <b>884</b> | <b>0.037</b> |
| 0007010 | cytoskeleton organization and biogenesis                      | 78                    | 1497        | 92            | 1322        | 0.08         | 22               | 591        | 56         | 906        | 0.061        |
| 0006997 | nuclear organization and biogenesis                           | 5                     | 1570        | 5             | 1409        | 0.884        | 0                | 613        | 5          | 957        | 0.184        |
| 0007028 | cytoplasm organization and biogenesis                         | 9                     | 1566        | 10            | 1404        | 0.814        | 2                | 611        | 7          | 955        | 0.492        |
| 0016044 | membrane organization and biogenesis                          | 2                     | 1573        | 7             | 1407        | 0.134        | 1                | 612        | 1          | 961        | 0.686        |
| 0051128 | regulation of cell organization and biogenesis                | 6                     | 1569        | 5             | 1409        | 0.858        | 1                | 612        | 5          | 957        | 0.483        |
| 0016049 | cell growth                                                   | 4                     | 1571        | 5             | 1409        | 0.871        | 2                | 611        | 2          | 960        | 0.953        |
| 0050896 | response to stimulus                                          | 91                    | 1484        | 90            | 1324        | 0.552        | 39               | 574        | 52         | 910        | 0.495        |
| 0006950 | response to stress                                            | 30                    | 1545        | 29            | 1385        | 0.877        | <b>5</b>         | <b>608</b> | <b>25</b>  | <b>937</b> | <b>0.02</b>  |
| 0009408 | response to heat                                              | 5                     | 1570        | 5             | 1409        | 0.884        | 0                | 613        | 5          | 957        | 0.184        |
| 0006979 | response to oxidative stress                                  | 2                     | 1573        | 0             | 1414        | 0.527        | 1                | 612        | 1          | 961        | 0.686        |
| 0051179 | localization                                                  | <b>251</b>            | <b>1324</b> | <b>178</b>    | <b>1236</b> | <b>0.011</b> | 109              | 504        | 142        | 820        | 0.127        |
| 0006403 | RNA localization                                              | 17                    | 1558        | 15            | 1399        | 0.898        | 4                | 609        | 13         | 949        | 0.29         |
| 0008104 | protein localization                                          | 115                   | 1460        | 80            | 1334        | 0.081        | <b>32</b>        | <b>581</b> | <b>83</b>  | <b>879</b> | <b>0.015</b> |
| 0051234 | establishment of localization                                 | <b>234</b>            | <b>1341</b> | <b>169</b>    | <b>1245</b> | <b>0.023</b> | 105              | 508        | 129        | 833        | 0.051        |
| 0051235 | maintenance of localization                                   | 2                     | 1573        | 2             | 1412        | 0.694        | 0                | 613        | 2          | 960        | 0.686        |
| 0050789 | regulation of biological process                              | <b>191</b>            | <b>1384</b> | <b>212</b>    | <b>1202</b> | <b>0.025</b> | <b>59</b>        | <b>554</b> | <b>132</b> | <b>830</b> | <b>0.019</b> |
| 0050790 | regulation of enzyme activity                                 | 5                     | 1570        | 9             | 1405        | 0.314        | 1                | 612        | 4          | 958        | 0.682        |
| 0040029 | regulation of gene expression, epigenetic                     | 11                    | 1564        | 9             | 1405        | 0.986        | 5                | 608        | 6          | 956        | 0.892        |
| 0006306 | DNA methylation                                               | 5                     | 1570        | 2             | 1412        | 0.539        | 2                | 611        | 3          | 959        | 0.682        |
| 0045814 | negative regulation of gene expression, epigenetic            | 4                     | 1571        | 3             | 1411        | 0.886        | 2                | 611        | 2          | 960        | 0.953        |
| 0006342 | chromatin silencing                                           | 4                     | 1571        | 3             | 1411        | 0.886        | 2                | 611        | 2          | 960        | 0.953        |
| 0003674 | molecular_function                                            | 934                   | 641         | 798           | 616         | 0.122        | <b>318</b>       | <b>295</b> | <b>616</b> | <b>346</b> | <b>2E-06</b> |
| 0016209 | antioxidant activity                                          | 7                     | 1568        | 2             | 1412        | 0.24         | 2                | 611        | 5          | 957        | 0.862        |
| 0005488 | binding                                                       | 533                   | 1042        | 474           | 940         | 0.884        | <b>165</b>       | <b>448</b> | <b>368</b> | <b>594</b> | <b>5E-06</b> |
| 0005509 | calcium ion binding                                           | 26                    | 1549        | 35            | 1379        | 0.144        | 13               | 600        | 13         | 949        | 0.334        |
| 0030246 | carbohydrate binding                                          | 5                     | 1570        | 10            | 1404        | 0.213        | 1                | 612        | 4          | 958        | 0.682        |
| 0008289 | lipid binding                                                 | 10                    | 1565        | 16            | 1398        | 0.207        | 6                | 607        | 4          | 958        | 0.295        |
| 0003676 | nucleic acid binding                                          | 220                   | 1355        | 169           | 1245        | 0.114        | <b>59</b>        | <b>554</b> | <b>161</b> | <b>801</b> | <b>1E-04</b> |
| 0003677 | DNA binding                                                   | 91                    | 1484        | 103           | 1311        | 0.111        | 36               | 577        | 55         | 907        | 0.985        |
| 0003682 | chromatin binding                                             | 9                     | 1566        | 14            | 1400        | 0.272        | 5                | 608        | 4          | 958        | 0.494        |
| 0003700 | transcription factor activity                                 | 41                    | 1534        | 45            | 1369        | 0.403        | 21               | 592        | 20         | 942        | 0.14         |
| 0003723 | RNA binding                                                   | <b>74</b>             | <b>1501</b> | <b>45</b>     | <b>1369</b> | <b>0.043</b> | <b>13</b>        | <b>600</b> | <b>61</b>  | <b>901</b> | <b>2E-04</b> |
| 0008135 | translation factor activity, nucleic acid binding             | <b>31</b>             | <b>1544</b> | <b>4</b>      | <b>1410</b> | <b>4E-05</b> | <b>3</b>         | <b>610</b> | <b>28</b>  | <b>934</b> | <b>0.001</b> |
| 0000166 | nucleotide binding                                            | 139                   | 1436        | 116           | 1298        | 0.588        | <b>40</b>        | <b>573</b> | <b>99</b>  | <b>863</b> | <b>0.013</b> |
| 0005515 | protein binding                                               | 191                   | 1384        | 188           | 1226        | 0.366        | <b>51</b>        | <b>562</b> | <b>140</b> | <b>822</b> | <b>3E-04</b> |
| 0008134 | transcription factor binding                                  | 15                    | 1560        | 16            | 1398        | 0.763        | 1                | 612        | 14         | 948        | 0.021        |
| 0008092 | cytoskeletal protein binding                                  | 43                    | 1532        | 45            | 1369        | 0.534        | <b>10</b>        | <b>603</b> | <b>33</b>  | <b>929</b> | <b>0.048</b> |
| 0003779 | actin binding                                                 | 26                    | 1549        | 27            | 1387        | 0.692        | <b>4</b>         | <b>609</b> | <b>22</b>  | <b>940</b> | <b>0.023</b> |
| 0003824 | catalytic activity                                            | 450                   | 1125        | 389           | 1025        | 0.546        | <b>142</b>       | <b>471</b> | <b>308</b> | <b>654</b> | <b>2E-04</b> |
| 0016787 | hydrolase activity                                            | 202                   | 1373        | 170           | 1244        | 0.543        | <b>62</b>        | <b>551</b> | <b>140</b> | <b>822</b> | <b>0.013</b> |
| 0003924 | GTPase activity                                               | 21                    | 1554        | 19            | 1395        | 0.893        | 8                | 605        | 13         | 949        | 0.883        |
| 0004518 | nuclease activity                                             | 8                     | 1567        | 7             | 1407        | 0.834        | 3                | 610        | 5          | 957        | 0.779        |



## PC8

| GO#     | GO term                                    | Representational bias |             |               |             |              | Directional bias |            |            |            |              |
|---------|--------------------------------------------|-----------------------|-------------|---------------|-------------|--------------|------------------|------------|------------|------------|--------------|
|         |                                            | regulated             |             | not regulated |             | $\rho$       | up-reg.          |            | down-reg.  |            | $\rho$       |
|         |                                            | term                  | n.term      | term          | n.term      |              | term             | n.term     | term       | n.term     |              |
| 0008233 | peptidase activity                         | 70                    | 1505        | 48            | 1366        | 0.168        | <b>18</b>        | <b>595</b> | <b>52</b>  | <b>910</b> | <b>0.028</b> |
| 0004721 | phosphoprotein phosphatase activity        | 11                    | 1564        | 19            | 1395        | 0.113        | 4                | 609        | 7          | 955        | 0.892        |
| 0016740 | transferase activity                       | 119                   | 1456        | 122           | 1292        | 0.313        | 41               | 572        | 78         | 884        | 0.346        |
| 0016301 | kinase activity                            | <b>58</b>             | <b>1517</b> | <b>77</b>     | <b>1337</b> | <b>0.026</b> | 23               | 590        | 35         | 927        | 0.984        |
| 0004672 | protein kinase activity                    | <b>38</b>             | <b>1537</b> | <b>57</b>     | <b>1357</b> | <b>0.016</b> | 16               | 597        | 22         | 940        | 0.811        |
| 0030234 | enzyme regulator activity                  | 58                    | 1517        | 47            | 1367        | 0.666        | 21               | 592        | 37         | 925        | 0.768        |
| 0003774 | motor activity                             | 10                    | 1565        | 18            | 1396        | 0.106        | 3                | 610        | 7          | 955        | 0.799        |
| 0004871 | signal transducer activity                 | 128                   | 1447        | 128           | 1286        | 0.403        | 59               | 554        | 69         | 893        | 0.101        |
| 0004872 | receptor activity                          | 55                    | 1520        | 54            | 1360        | 0.705        | 27               | 586        | 28         | 934        | 0.152        |
| 0004879 | ligand-dependent nuclear receptor activity | 3                     | 1572        | 6             | 1408        | 0.406        | 1                | 612        | 2          | 960        | 0.694        |
| 0004888 | transmembrane receptor activity            | 38                    | 1537        | 36            | 1378        | 0.907        | 19               | 594        | 19         | 943        | 0.211        |
| 0004930 | G-protein coupled receptor activity        | 16                    | 1559        | 14            | 1400        | 0.91         | 6                | 607        | 10         | 952        | 0.888        |
| 0005057 | receptor signaling protein activity        | 38                    | 1537        | 42            | 1372        | 0.407        | 16               | 597        | 22         | 940        | 0.811        |
| 0005102 | receptor binding                           | 34                    | 1541        | 35            | 1379        | 0.65         | 12               | 601        | 22         | 940        | 0.794        |
| 0005198 | structural molecule activity               | 82                    | 1493        | 80            | 1334        | 0.643        | 26               | 587        | 56         | 906        | 0.208        |
| 0030528 | transcription regulator activity           | 93                    | 1482        | 106           | 1308        | 0.095        | 33               | 580        | 60         | 902        | 0.554        |
| 0045182 | translation regulator activity             | <b>31</b>             | <b>1544</b> | <b>4</b>      | <b>1410</b> | <b>4E-05</b> | <b>3</b>         | <b>610</b> | <b>28</b>  | <b>934</b> | <b>0.001</b> |
| 0005215 | transporter activity                       | <b>153</b>            | <b>1422</b> | <b>100</b>    | <b>1314</b> | <b>0.012</b> | <b>77</b>        | <b>536</b> | <b>76</b>  | <b>886</b> | <b>0.003</b> |
| 0005489 | electron transporter activity              | 20                    | 1555        | 9             | 1405        | 0.115        | 5                | 608        | 15         | 947        | 0.292        |
| 0005216 | ion channel activity                       | 28                    | 1547        | 24            | 1390        | 0.978        | <b>23</b>        | <b>590</b> | <b>5</b>   | <b>957</b> | <b>6E-06</b> |
| 0005244 | voltage-gated ion channel activity         | 14                    | 1561        | 12            | 1402        | 0.937        | <b>11</b>        | <b>602</b> | <b>3</b>   | <b>959</b> | <b>0.005</b> |
| 0005575 | cellular_component                         | 671                   | 904         | 552           | 862         | 0.052        | <b>216</b>       | <b>397</b> | <b>455</b> | <b>507</b> | <b>3E-06</b> |
| 0005623 | cell                                       | <b>617</b>            | <b>958</b>  | <b>495</b>    | <b>919</b>  | <b>0.021</b> | <b>198</b>       | <b>415</b> | <b>419</b> | <b>543</b> | <b>1E-05</b> |
| 0005622 | intracellular                              | 475                   | 1100        | 382           | 1032        | 0.063        | <b>116</b>       | <b>497</b> | <b>359</b> | <b>603</b> | <b>1E-14</b> |
| 0005737 | cytoplasm                                  | <b>277</b>            | <b>1298</b> | <b>181</b>    | <b>1233</b> | <b>3E-04</b> | <b>51</b>        | <b>562</b> | <b>226</b> | <b>736</b> | <b>2E-14</b> |
| 0016023 | cytoplasmic vesicle                        | 25                    | 1550        | 16            | 1398        | 0.362        | 6                | 607        | 19         | 943        | 0.182        |
| 0005829 | cytosol                                    | <b>63</b>             | <b>1512</b> | <b>16</b>     | <b>1398</b> | <b>2E-06</b> | <b>5</b>         | <b>608</b> | <b>58</b>  | <b>904</b> | <b>5E-07</b> |
| 0005783 | endoplasmic reticulum                      | <b>43</b>             | <b>1532</b> | <b>14</b>     | <b>1400</b> | <b>8E-04</b> | <b>6</b>         | <b>607</b> | <b>37</b>  | <b>925</b> | <b>0.001</b> |
| 0005794 | Golgi apparatus                            | 11                    | 1564        | 14            | 1400        | 0.501        | 1                | 612        | 10         | 952        | 0.084        |
| 0005815 | microtubule organizing center              | 5                     | 1570        | 4             | 1410        | 0.871        | 1                | 612        | 4          | 958        | 0.682        |
| 0005739 | mitochondrion                              | <b>69</b>             | <b>1506</b> | <b>36</b>     | <b>1378</b> | <b>0.009</b> | <b>13</b>        | <b>600</b> | <b>56</b>  | <b>906</b> | <b>7E-04</b> |
| 0005840 | ribosome                                   | 14                    | 1561        | 10            | 1404        | 0.726        | 3                | 610        | 11         | 951        | 0.283        |
| 0005773 | vacuole                                    | 7                     | 1568        | 7             | 1407        | 0.947        | 5                | 608        | 2          | 960        | 0.168        |
| 0005764 | lysosome                                   | 2                     | 1573        | 3             | 1411        | 0.904        | 0                | 613        | 2          | 960        | 0.686        |
| 0005856 | cytoskeleton                               | 40                    | 1535        | 45            | 1369        | 0.344        | 10               | 603        | 30         | 932        | 0.096        |
| 0005694 | chromosome                                 | <b>13</b>             | <b>1562</b> | <b>27</b>     | <b>1387</b> | <b>0.016</b> | 4                | 609        | 9          | 953        | 0.749        |
| 0000228 | nuclear chromosome                         | 3                     | 1572        | 2             | 1412        | 0.904        | 2                | 611        | 1          | 961        | 0.694        |
| 0005634 | nucleus                                    | 192                   | 1383        | 180           | 1234        | 0.696        | <b>52</b>        | <b>561</b> | <b>140</b> | <b>822</b> | <b>4E-04</b> |
| 0005635 | nuclear membrane                           | 7                     | 1568        | 10            | 1404        | 0.478        | 1                | 612        | 6          | 956        | 0.341        |
| 0005730 | nucleolus                                  | 7                     | 1568        | 4             | 1410        | 0.67         | 0                | 613        | 7          | 955        | 0.084        |
| 0005654 | nucleoplasm                                | 33                    | 1542        | 39            | 1375        | 0.289        | 11               | 602        | 22         | 940        | 0.628        |
| 0005777 | peroxisome                                 | 6                     | 1569        | 3             | 1411        | 0.612        | 0                | 613        | 6          | 956        | 0.124        |
| 0005886 | plasma membrane                            | 79                    | 1496        | 77            | 1337        | 0.656        | <b>48</b>        | <b>565</b> | <b>31</b>  | <b>931</b> | <b>7E-05</b> |
| 0005576 | extracellular region                       | 38                    | 1537        | 38            | 1376        | 0.719        | 20               | 593        | 18         | 944        | 0.113        |
| 0005578 | extracellular matrix (sensu Metazoa)       | 20                    | 1555        | 15            | 1399        | 0.719        | 12               | 601        | 8          | 954        | 0.086        |

| GO#     | GO term                                                                           | Representational bias |        |               |        |        | Directional bias |            |           |            |              |
|---------|-----------------------------------------------------------------------------------|-----------------------|--------|---------------|--------|--------|------------------|------------|-----------|------------|--------------|
|         |                                                                                   | regulated             |        | not regulated |        | $\rho$ | up-reg.          |            | down-reg. |            | $\rho$       |
|         |                                                                                   | term                  | n.term | term          | n.term |        | term             | n.term     | term      | n.term     |              |
| 0008150 | biological_process                                                                | 862                   | 613    | 892           | 622    | 0.82   | 444              | 321        | 418       | 292        | 0.786        |
| 0007610 | behavior                                                                          | 72                    | 1403   | 90            | 1424   | 0.229  | <b>46</b>        | <b>719</b> | <b>26</b> | <b>684</b> | <b>0.049</b> |
| 0030534 | adult behavior                                                                    | 11                    | 1464   | 13            | 1501   | 0.888  | 8                | 757        | 3         | 707        | 0.277        |
| 0030537 | larval behavior                                                                   | 2                     | 1473   | 7             | 1507   | 0.195  | 1                | 764        | 1         | 709        | 0.512        |
| 0007611 | learning and/or memory                                                            | 10                    | 1465   | 14            | 1500   | 0.582  | 7                | 758        | 3         | 707        | 0.404        |
| 0007612 | learning                                                                          | 6                     | 1469   | 9             | 1505   | 0.64   | 3                | 762        | 3         | 707        | 0.751        |
| 0007613 | memory                                                                            | 4                     | 1471   | 7             | 1507   | 0.575  | 2                | 763        | 2         | 708        | 0.67         |
| 0007626 | locomotory behavior                                                               | 56                    | 1419   | 67            | 1447   | 0.439  | 36               | 729        | 20        | 690        | 0.078        |
| 0007635 | chemosensory behavior                                                             | 8                     | 1467   | 10            | 1504   | 0.856  | 5                | 760        | 3         | 707        | 0.803        |
| 0007622 | rhythmic behavior                                                                 | 8                     | 1467   | 7             | 1507   | 0.96   | 2                | 763        | 6         | 704        | 0.242        |
| 0048512 | circadian behavior                                                                | 8                     | 1467   | 6             | 1508   | 0.751  | 2                | 763        | 6         | 704        | 0.242        |
| 0009987 | cellular process                                                                  | 796                   | 679    | 832           | 682    | 0.613  | 418              | 347        | 378       | 332        | 0.626        |
| 0007154 | cell communication                                                                | 245                   | 1230   | 244           | 1270   | 0.752  | 123              | 642        | 122       | 588        | 0.617        |
| 0007155 | cell adhesion                                                                     | 44                    | 1431   | 46            | 1468   | 0.985  | 25               | 740        | 19        | 691        | 0.607        |
| 0008037 | cell recognition                                                                  | 1                     | 1474   | 1             | 1513   | 0.491  | 1                | 764        | 0         | 710        | 0.97         |
| 0008038 | neuronal cell recognition                                                         | 1                     | 1474   | 1             | 1513   | 0.491  | 1                | 764        | 0         | 710        | 0.97         |
| 0016337 | cell-cell adhesion                                                                | 19                    | 1456   | 20            | 1494   | 0.935  | 11               | 754        | 8         | 702        | 0.765        |
| 0016339 | calcium-dependent cell-cell adhesion                                              | 2                     | 1473   | 5             | 1509   | 0.47   | 2                | 763        | 0         | 710        | 0.512        |
| 0007156 | homophilic cell adhesion                                                          | 3                     | 1472   | 6             | 1508   | 0.53   | 3                | 762        | 0         | 710        | 0.275        |
| 0007160 | cell-matrix adhesion                                                              | 4                     | 1471   | 5             | 1509   | 0.969  | 2                | 763        | 2         | 708        | 0.67         |
| 0007267 | cell-cell signaling                                                               | 82                    | 1393   | 74            | 1440   | 0.457  | 41               | 724        | 41        | 669        | 0.815        |
| 0019226 | transmission of nerve impulse                                                     | 72                    | 1403   | 66            | 1448   | 0.553  | 38               | 727        | 34        | 676        | 0.97         |
| 0007268 | synaptic transmission                                                             | 51                    | 1424   | 50            | 1464   | 0.894  | 27               | 738        | 24        | 686        | 0.989        |
| 0007270 | nerve-nerve synaptic transmission                                                 | 8                     | 1467   | 8             | 1506   | 0.843  | 3                | 762        | 5         | 705        | 0.645        |
| 0001505 | regulation of neurotransmitter levels                                             | 31                    | 1444   | 29            | 1485   | 0.816  | 16               | 749        | 15        | 695        | 0.878        |
| 0042133 | neurotransmitter metabolism                                                       | 4                     | 1471   | 4             | 1510   | 0.751  | 2                | 763        | 2         | 708        | 0.67         |
| 0007269 | neurotransmitter secretion                                                        | 27                    | 1448   | 26            | 1488   | 0.924  | 14               | 751        | 13        | 697        | 0.847        |
| 0007165 | signal transduction                                                               | 186                   | 1289   | 193           | 1321   | 0.954  | 94               | 671        | 92        | 618        | 0.757        |
| 0007166 | cell surface receptor linked signal transduction                                  | 82                    | 1393   | 75            | 1439   | 0.509  | 40               | 725        | 42        | 668        | 0.645        |
| 0007167 | enzyme linked receptor protein signaling pathway                                  | 24                    | 1451   | 22            | 1492   | 0.812  | 11               | 754        | 13        | 697        | 0.696        |
| 0007178 | transmembrane receptor protein serine/threonine kinase signaling pathway          | 8                     | 1467   | 8             | 1506   | 0.843  | 5                | 760        | 3         | 707        | 0.803        |
| 0007179 | transforming growth factor beta receptor signaling pathway                        | 5                     | 1470   | 4             | 1510   | 0.969  | 2                | 763        | 3         | 707        | 0.933        |
| 0007169 | transmembrane receptor protein tyrosine kinase signaling pathway                  | 17                    | 1458   | 15            | 1499   | 0.801  | 7                | 758        | 10        | 700        | 0.52         |
| 0007173 | epidermal growth factor receptor signaling pathway                                | 3                     | 1472   | 5             | 1509   | 0.751  | 2                | 763        | 1         | 709        | 0.948        |
| 0008286 | insulin receptor signaling pathway                                                | 1                     | 1474   | 3             | 1511   | 0.635  | 1                | 764        | 0         | 710        | 0.97         |
| 0008293 | torso signaling pathway                                                           | 4                     | 1471   | 3             | 1511   | 0.972  | 1                | 764        | 3         | 707        | 0.565        |
| 0007186 | G-protein coupled receptor protein signaling pathway                              | 35                    | 1440   | 36            | 1478   | 0.911  | 15               | 750        | 20        | 690        | 0.364        |
| 0007200 | G-protein signaling, coupled to IP3 second messenger (phospholipase C activating) | 1                     | 1474   | 4             | 1510   | 0.386  | 0                | 765        | 1         | 709        | 0.97         |
| 0007219 | Notch signaling pathway                                                           | 6                     | 1469   | 7             | 1507   | 0.962  | 3                | 762        | 3         | 707        | 0.751        |
| 0007224 | smoothened signaling pathway                                                      | 3                     | 1472   | 3             | 1511   | 0.706  | 2                | 763        | 1         | 709        | 0.948        |
| 0008063 | Toll signaling pathway                                                            | 2                     | 1473   | 2             | 1512   | 0.635  | 1                | 764        | 1         | 709        | 0.512        |
| 0016055 | Wnt receptor signaling pathway                                                    | 7                     | 1468   | 9             | 1505   | 0.843  | 6                | 759        | 1         | 709        | 0.156        |
| 0007242 | intracellular signaling cascade                                                   | 89                    | 1386   | 93            | 1421   | 0.962  | 46               | 719        | 43        | 667        | 0.941        |
| 0007263 | nitric oxide mediated signal transduction                                         | 2                     | 1473   | 2             | 1512   | 0.635  | 0                | 765        | 2         | 708        | 0.447        |
| 0007243 | protein kinase cascade                                                            | 22                    | 1453   | 19            | 1495   | 0.69   | 11               | 754        | 11        | 699        | 0.969        |
| 0007259 | JAK-STAT cascade                                                                  | 1                     | 1474   | 5             | 1509   | 0.232  | 1                | 764        | 0         | 710        | 0.97         |
| 0000165 | MAPKKK cascade                                                                    | 19                    | 1456   | 14            | 1500   | 0.438  | 10               | 755        | 9         | 701        | 0.87         |
| 0019932 | second-messenger-mediated signaling                                               | 11                    | 1464   | 11            | 1503   | 0.879  | 6                | 759        | 5         | 705        | 0.901        |
| 0019722 | calcium-mediated signaling                                                        | 8                     | 1467   | 7             | 1507   | 0.96   | 6                | 759        | 2         | 708        | 0.338        |
| 0048015 | phosphoinositide-mediated signaling                                               | 1                     | 1474   | 4             | 1510   | 0.386  | 0                | 765        | 1         | 709        | 0.97         |
| 0007264 | small GTPase mediated signal transduction                                         | 24                    | 1451   | 20            | 1494   | 0.587  | 11               | 754        | 13        | 697        | 0.696        |
| 0007265 | Ras protein signal transduction                                                   | 5                     | 1470   | 5             | 1509   | 0.783  | 4                | 761        | 1         | 709        | 0.416        |
| 0009966 | regulation of signal transduction                                                 | 17                    | 1458   | 17            | 1497   | 0.924  | 8                | 757        | 9         | 701        | 0.877        |
| 0007275 | development                                                                       | 229                   | 1246   | 231           | 1283   | 0.879  | 124              | 641        | 105       | 605        | 0.496        |
| 0007568 | aging                                                                             | 6                     | 1469   | 5             | 1509   | 0.965  | 2                | 763        | 4         | 706        | 0.616        |
| 0030154 | cell differentiation                                                              | 62                    | 1413   | 57            | 1457   | 0.603  | 32               | 733        | 30        | 680        | 0.929        |
| 0048468 | cell development                                                                  | 33                    | 1442   | 42            | 1472   | 0.412  | 17               | 748        | 16        | 694        | 0.892        |
| 0000904 | cellular morphogenesis during differentiation                                     | 8                     | 1467   | 11            | 1503   | 0.687  | 5                | 760        | 3         | 707        | 0.803        |
| 0042461 | photoreceptor cell development                                                    | 8                     | 1467   | 10            | 1504   | 0.856  | 5                | 760        | 3         | 707        | 0.803        |
| 0042051 | eye photoreceptor development (sensu Endopterygota)                               | 8                     | 1467   | 9             | 1505   | 0.957  | 5                | 760        | 3         | 707        | 0.803        |
| 0045165 | cell fate commitment                                                              | 29                    | 1446   | 20            | 1494   | 0.213  | 14               | 751        | 15        | 695        | 0.839        |

## PC9

| GO#     | GO term                                                        | Representational bias |             |               |             |              | Directional bias |            |           |            |              |
|---------|----------------------------------------------------------------|-----------------------|-------------|---------------|-------------|--------------|------------------|------------|-----------|------------|--------------|
|         |                                                                | regulated             |             | not regulated |             | $\rho$       | up-reg.          |            | down-reg. |            | $\rho$       |
|         |                                                                | term                  | n.term      | term          | n.term      |              | term             | n.term     | term      | n.term     |              |
| 0001709 | cell fate determination                                        | 18                    | 1457        | 12            | 1502        | 0.322        | 8                | 757        | 10        | 700        | 0.692        |
| 0007400 | neuroblast cell fate determination                             | 4                     | 1471        | 4             | 1510        | 0.751        | 2                | 763        | 2         | 708        | 0.67         |
| 0001708 | cell fate specification                                        | 4                     | 1471        | 4             | 1510        | 0.751        | 1                | 764        | 3         | 707        | 0.565        |
| 0007349 | cellularization                                                | 5                     | 1470        | 6             | 1508        | 0.965        | 3                | 762        | 2         | 708        | 0.933        |
| 0040007 | growth                                                         | 14                    | 1461        | 22            | 1492        | 0.273        | 8                | 757        | 6         | 704        | 0.898        |
| 0002164 | larval development                                             | 7                     | 1468        | 10            | 1504        | 0.665        | 3                | 762        | 4         | 706        | 0.921        |
| 0002165 | larval or pupal development (sensu Insecta)                    | 62                    | 1413        | 67            | 1447        | 0.835        | 35               | 730        | 27        | 683        | 0.543        |
| 0007552 | metamorphosis                                                  | 59                    | 1416        | 62            | 1452        | 0.969        | 35               | 730        | 24        | 686        | 0.3          |
| 0009653 | morphogenesis                                                  | 163                   | 1312        | 156           | 1358        | 0.547        | 91               | 674        | 72        | 638        | 0.322        |
| 0002009 | morphogenesis of an epithelium                                 | 28                    | 1447        | 16            | 1498        | 0.079        | 16               | 749        | 12        | 698        | 0.709        |
| 0009887 | organogenesis                                                  | 143                   | 1332        | 139           | 1375        | 0.676        | 76               | 689        | 67        | 643        | 0.814        |
| 0001654 | eye morphogenesis                                              | 30                    | 1445        | 27            | 1487        | 0.714        | 16               | 749        | 14        | 696        | 0.983        |
| 0008406 | gonad development                                              | 3                     | 1472        | 8             | 1506        | 0.244        | 1                | 764        | 2         | 708        | 0.948        |
| 0007444 | imaginal disc development                                      | 45                    | 1430        | 48            | 1466        | 0.934        | 28               | 737        | 17        | 693        | 0.207        |
| 0007494 | midgut development                                             | 4                     | 1471        | 1             | 1513        | 0.355        | 1                | 764        | 3         | 707        | 0.565        |
| 0007517 | muscle development                                             | 14                    | 1461        | 20            | 1494        | 0.432        | 6                | 759        | 8         | 702        | 0.683        |
| 0007399 | neurogenesis                                                   | 82                    | 1393        | 80            | 1434        | 0.801        | 39               | 726        | 43        | 667        | 0.491        |
| 0007409 | axonogenesis                                                   | 20                    | 1455        | 23            | 1491        | 0.825        | 13               | 752        | 7         | 703        | 0.338        |
| 0007411 | axon guidance                                                  | 18                    | 1457        | 15            | 1499        | 0.67         | 13               | 752        | 5         | 705        | 0.133        |
| 0007417 | central nervous system development                             | 21                    | 1454        | 18            | 1496        | 0.686        | 9                | 756        | 12        | 698        | 0.54         |
| 0016358 | dendrite morphogenesis                                         | 6                     | 1469        | 8             | 1506        | 0.827        | 3                | 762        | 3         | 707        | 0.751        |
| 0042063 | gliogenesis                                                    | 4                     | 1471        | 7             | 1507        | 0.575        | 4                | 761        | 0         | 710        | 0.153        |
| 0007422 | peripheral nervous system development                          | 16                    | 1459        | 24            | 1490        | 0.302        | 5                | 760        | 11        | 699        | 0.159        |
| 0050767 | regulation of neurogenesis                                     | 3                     | 1472        | 2             | 1512        | 0.977        | 3                | 762        | 0         | 710        | 0.275        |
| 0007424 | tracheal system development (sensu Insecta)                    | 16                    | 1459        | 21            | 1493        | 0.561        | 10               | 755        | 6         | 704        | 0.545        |
| 0048513 | organ development                                              | 144                   | 1331        | 142           | 1372        | 0.769        | 77               | 688        | 67        | 643        | 0.75         |
| 0007389 | pattern specification                                          | 35                    | 1440        | 41            | 1473        | 0.641        | 17               | 748        | 18        | 692        | 0.823        |
| 0048066 | pigmentation                                                   | 5                     | 1470        | 6             | 1508        | 0.965        | 1                | 764        | 4         | 706        | 0.327        |
| 0009791 | post-embryonic development                                     | 7                     | 1468        | 10            | 1504        | 0.665        | 3                | 762        | 4         | 706        | 0.921        |
| 0009790 | embryonic development                                          | 54                    | 1421        | 46            | 1468        | 0.398        | 29               | 736        | 25        | 685        | 0.891        |
| 0007530 | sex determination                                              | 4                     | 1471        | 6             | 1508        | 0.783        | 2                | 763        | 2         | 708        | 0.67         |
| 0007548 | sex differentiation                                            | 7                     | 1468        | 12            | 1502        | 0.388        | 2                | 763        | 5         | 705        | 0.391        |
| 0019827 | stem cell maintenance                                          | 4                     | 1471        | 4             | 1510        | 0.751        | 2                | 763        | 2         | 708        | 0.67         |
| 0000003 | reproduction                                                   | 64                    | 1411        | 80            | 1434        | 0.262        | 39               | 726        | 25        | 685        | 0.175        |
| 0050793 | regulation of development                                      | 19                    | 1456        | 24            | 1490        | 0.597        | 12               | 753        | 7         | 703        | 0.447        |
| 0007582 | physiological process                                          | 784                   | 691         | 821           | 693         | 0.581        | 414              | 351        | 370       | 340        | 0.472        |
| 0008152 | metabolism                                                     | <b>546</b>            | <b>929</b>  | <b>620</b>    | <b>894</b>  | <b>0.03</b>  | 290              | 475        | 256       | 454        | 0.495        |
| 0009056 | catabolism                                                     | 96                    | 1379        | 113           | 1401        | 0.341        | 53               | 712        | 43        | 667        | 0.567        |
| 0006091 | energy pathways                                                | 50                    | 1425        | 58            | 1456        | 0.584        | 19               | 746        | 31        | 679        | 0.064        |
| 0006118 | electron transport                                             | 26                    | 1449        | 29            | 1485        | 0.861        | 10               | 755        | 16        | 694        | 0.237        |
| 0006139 | nucleobase, nucleoside, nucleotide and nucleic acid metabolism | 212                   | 1263        | 220           | 1294        | 0.943        | <b>130</b>       | <b>635</b> | <b>12</b> | <b>628</b> | <b>0.004</b> |
| 0006259 | DNA metabolism                                                 | 42                    | 1433        | 37            | 1477        | 0.566        | <b>30</b>        | <b>735</b> | <b>82</b> | <b>698</b> | <b>0.016</b> |
| 0006350 | transcription                                                  | 111                   | 1364        | 116           | 1398        | 0.943        | <b>70</b>        | <b>695</b> | <b>41</b> | <b>669</b> | <b>0.018</b> |
| 0043170 | macromolecule metabolism                                       | <b>284</b>            | <b>1191</b> | <b>344</b>    | <b>1170</b> | <b>0.023</b> | 151              | 614        | 133       | 577        | 0.672        |
| 0019538 | protein metabolism                                             | 242                   | 1233        | 285           | 1229        | 0.092        | 133              | 632        | 109       | 601        | 0.325        |
| 0006412 | protein biosynthesis                                           | 49                    | 1426        | 61            | 1453        | 0.353        | 31               | 734        | 18        | 692        | 0.139        |
| 0006464 | protein modification                                           | 117                   | 1358        | 139           | 1375        | 0.248        | 59               | 706        | 58        | 652        | 0.82         |
| 0006457 | protein folding                                                | 23                    | 1452        | 20            | 1494        | 0.694        | 10               | 755        | 13        | 697        | 0.548        |
| 0005975 | carbohydrate metabolism                                        | <b>42</b>             | <b>1433</b> | <b>65</b>     | <b>1449</b> | <b>0.042</b> | 20               | 745        | 22        | 688        | 0.688        |
| 0006519 | amino acid and derivative metabolism                           | 34                    | 1441        | 36            | 1478        | 0.992        | 16               | 749        | 18        | 692        | 0.694        |
| 0006629 | lipid metabolism                                               | 38                    | 1437        | 51            | 1463        | 0.243        | 15               | 750        | 23        | 687        | 0.166        |
| 0009308 | amine metabolism                                               | 36                    | 1439        | 45            | 1469        | 0.434        | 17               | 748        | 19        | 691        | 0.692        |
| 0042440 | pigment metabolism                                             | 7                     | 1468        | 5             | 1509        | 0.738        | 3                | 762        | 4         | 706        | 0.921        |
| 0042445 | hormone metabolism                                             | 4                     | 1471        | 3             | 1511        | 0.972        | 1                | 764        | 3         | 707        | 0.565        |
| 0009058 | biosynthesis                                                   | 88                    | 1387        | 116           | 1398        | 0.077        | 49               | 716        | 39        | 671        | 0.529        |
| 0019748 | secondary metabolism                                           | 8                     | 1467        | 6             | 1508        | 0.751        | 3                | 762        | 5         | 705        | 0.645        |
| 0019222 | regulation of metabolism                                       | 117                   | 1358        | 121           | 1393        | 0.994        | <b>75</b>        | <b>690</b> | <b>42</b> | <b>668</b> | <b>0.008</b> |
| 0016265 | death                                                          | 44                    | 1431        | 42            | 1472        | 0.816        | 22               | 743        | 22        | 688        | 0.922        |
| 0008219 | cell death                                                     | 38                    | 1437        | 36            | 1478        | 0.817        | 20               | 745        | 18        | 692        | 0.945        |
| 0016271 | tissue death                                                   | 11                    | 1464        | 16            | 1498        | 0.481        | 7                | 758        | 4         | 706        | 0.63         |
| 0042592 | homeostasis                                                    | 16                    | 1459        | 13            | 1501        | 0.657        | 7                | 758        | 9         | 701        | 0.688        |
| 0019725 | cell homeostasis                                               | 15                    | 1460        | 11            | 1503        | 0.511        | 6                | 759        | 9         | 701        | 0.506        |
| 0050801 | ion homeostasis                                                | 9                     | 1466        | 5             | 1509        | 0.394        | 4                | 761        | 5         | 705        | 0.911        |
| 0043062 | extracellular structure organization and biogenesis            | 7                     | 1468        | 12            | 1502        | 0.388        | 4                | 761        | 3         | 707        | 0.921        |
| 0046903 | secretion                                                      | 50                    | 1425        | 51            | 1463        | 0.945        | 25               | 740        | 25        | 685        | 0.901        |
| 0048511 | rhythmic process                                               | 9                     | 1466        | 8             | 1506        | 0.957        | 3                | 762        | 6         | 704        | 0.435        |

| GO#     | GO term                                                       | Representational bias |             |               |             |              | Directional bias |            |            |            |              |
|---------|---------------------------------------------------------------|-----------------------|-------------|---------------|-------------|--------------|------------------|------------|------------|------------|--------------|
|         |                                                               | regulated             |             | not regulated |             | $\rho$       | up-reg.          |            | down-reg.  |            | $\rho$       |
|         |                                                               | term                  | n.term      | term          | n.term      |              | term             | n.term     | term       | n.term     |              |
| 0050791 | regulation of physiological process                           | 172                   | 1303        | 175           | 1339        | 0.976        | <b>105</b>       | <b>660</b> | <b>67</b>  | <b>643</b> | <b>0.013</b> |
| 0050874 | organismal physiological process                              | 111                   | 1364        | 121           | 1393        | 0.683        | 56               | 709        | 55         | 655        | 0.833        |
| 0050875 | cellular physiological process                                | 740                   | 735         | 779           | 735         | 0.506        | 396              | 369        | 344        | 366        | 0.223        |
| 0006810 | transport                                                     | 207                   | 1268        | 191           | 1323        | 0.277        | 111              | 654        | 96         | 614        | 0.637        |
| 0006811 | ion transport                                                 | 62                    | 1413        | 58            | 1456        | 0.671        | <b>23</b>        | <b>742</b> | <b>39</b>  | <b>671</b> | <b>0.025</b> |
| 0006818 | hydrogen transport                                            | 8                     | 1467        | 10            | 1504        | 0.856        | 3                | 762        | 5          | 705        | 0.645        |
| 0006836 | neurotransmitter transport                                    | 4                     | 1471        | 1             | 1513        | 0.355        | 2                | 763        | 2          | 708        | 0.67         |
| 0006858 | extracellular transport                                       | 11                    | 1464        | 4             | 1510        | 0.109        | 3                | 762        | 8          | 702        | 0.182        |
| 0006869 | lipid transport                                               | 6                     | 1469        | 10            | 1504        | 0.484        | 2                | 763        | 4          | 706        | 0.616        |
| 0008643 | carbohydrate transport                                        | 5                     | 1470        | 10            | 1504        | 0.325        | 2                | 763        | 3          | 707        | 0.933        |
| 0015031 | protein transport                                             | 98                    | 1377        | 82            | 1432        | 0.182        | 58               | 707        | 40         | 670        | 0.163        |
| 0015837 | amine transport                                               | 7                     | 1468        | 5             | 1509        | 0.738        | 2                | 763        | 5          | 705        | 0.391        |
| 0015931 | nucleobase, nucleoside, nucleotide and nucleic acid transport | 10                    | 1465        | 3             | 1511        | 0.086        | 8                | 757        | 2          | 708        | 0.142        |
| 0016192 | vesicle-mediated transport                                    | 66                    | 1409        | 53            | 1461        | 0.205        | 32               | 733        | 34         | 676        | 0.663        |
| 0045045 | secretory pathway                                             | 48                    | 1427        | 47            | 1467        | 0.897        | 24               | 741        | 24         | 686        | 0.908        |
| 0046907 | intracellular transport                                       | 110                   | 1365        | 88            | 1426        | 0.083        | 67               | 698        | 43         | 667        | 0.061        |
| 0051049 | regulation of transport                                       | 9                     | 1466        | 9             | 1505        | 0.856        | 6                | 759        | 3          | 707        | 0.578        |
| 0008283 | cell proliferation                                            | 36                    | 1439        | 35            | 1479        | 0.911        | 22               | 743        | 14         | 696        | 0.339        |
| 0007049 | cell cycle                                                    | 66                    | 1409        | 62            | 1452        | 0.673        | 41               | 724        | 25         | 685        | 0.114        |
| 0017145 | stem cell division                                            | 5                     | 1470        | 7             | 1507        | 0.807        | 2                | 763        | 3          | 707        | 0.933        |
| 0016043 | cell organization and biogenesis                              | 141                   | 1334        | 134           | 1380        | 0.544        | <b>88</b>        | <b>677</b> | <b>53</b>  | <b>657</b> | <b>0.011</b> |
| 0000902 | cellular morphogenesis                                        | 41                    | 1434        | 39            | 1475        | 0.817        | <b>29</b>        | <b>736</b> | <b>12</b>  | <b>698</b> | <b>0.022</b> |
| 0006996 | organelle organization and biogenesis                         | 122                   | 1353        | 116           | 1398        | 0.584        | <b>76</b>        | <b>689</b> | <b>46</b>  | <b>664</b> | <b>0.021</b> |
| 0007010 | cytoskeleton organization and biogenesis                      | 90                    | 1385        | 80            | 1434        | 0.376        | 54               | 711        | 36         | 674        | 0.137        |
| 0006997 | nuclear organization and biogenesis                           | 7                     | 1468        | 3             | 1511        | 0.321        | 5                | 760        | 2          | 708        | 0.51         |
| 0007028 | cytoplasm organization and biogenesis                         | <b>4</b>              | <b>1471</b> | <b>15</b>     | <b>1499</b> | <b>0.025</b> | 3                | 762        | 1          | 709        | 0.67         |
| 0016044 | membrane organization and biogenesis                          | 5                     | 1470        | 4             | 1510        | 0.969        | 5                | 760        | 0          | 710        | 0.087        |
| 0051128 | regulation of cell organization and biogenesis                | 7                     | 1468        | 4             | 1510        | 0.517        | 5                | 760        | 2          | 708        | 0.51         |
| 0016049 | cell growth                                                   | 4                     | 1471        | 5             | 1509        | 0.969        | 3                | 762        | 1          | 709        | 0.67         |
| 0050896 | response to stimulus                                          | 90                    | 1385        | 91            | 1423        | 0.978        | 43               | 722        | 47         | 663        | 0.489        |
| 0006950 | response to stress                                            | 26                    | 1449        | 33            | 1481        | 0.492        | 11               | 754        | 15         | 695        | 0.432        |
| 0009408 | response to heat                                              | 6                     | 1469        | 4             | 1510        | 0.72         | 2                | 763        | 4          | 706        | 0.616        |
| 0006979 | response to oxidative stress                                  | 1                     | 1474        | 1             | 1513        | 0.491        | 0                | 765        | 1          | 709        | 0.97         |
| 0051179 | localization                                                  | 220                   | 1255        | 209           | 1305        | 0.416        | 115              | 650        | 105        | 605        | 0.954        |
| 0006403 | RNA localization                                              | 16                    | 1459        | 16            | 1498        | 0.918        | 8                | 757        | 8          | 702        | 0.919        |
| 0008104 | protein localization                                          | 103                   | 1372        | 92            | 1422        | 0.353        | 60               | 705        | 43         | 667        | 0.214        |
| 0051234 | establishment of localization                                 | 209                   | 1266        | 194           | 1320        | 0.302        | 112              | 653        | 97         | 613        | 0.643        |
| 0051235 | maintenance of localization                                   | 1                     | 1474        | 3             | 1511        | 0.635        | 0                | 765        | 1          | 709        | 0.97         |
| 0050789 | regulation of biological process                              | 196                   | 1279        | 207           | 1307        | 0.8          | <b>117</b>       | <b>648</b> | <b>79</b>  | <b>631</b> | <b>0.023</b> |
| 0050790 | regulation of enzyme activity                                 | 4                     | 1471        | 10            | 1504        | 0.197        | 4                | 761        | 0          | 710        | 0.153        |
| 0040029 | regulation of gene expression, epigenetic                     | 8                     | 1467        | 12            | 1502        | 0.539        | 7                | 758        | 1          | 709        | 0.095        |
| 0006306 | DNA methylation                                               | 4                     | 1471        | 3             | 1511        | 0.972        | 3                | 762        | 1          | 709        | 0.67         |
| 0045814 | negative regulation of gene expression, epigenetic            | 2                     | 1473        | 5             | 1509        | 0.47         | 2                | 763        | 0          | 710        | 0.512        |
| 0006342 | chromatin silencing                                           | 2                     | 1473        | 5             | 1509        | 0.47         | 2                | 763        | 0          | 710        | 0.512        |
| 0003674 | molecular_function                                            | 842                   | 633         | 890           | 624         | 0.366        | 435              | 330        | 407        | 303        | 0.9          |
| 0016209 | antioxidant activity                                          | 6                     | 1469        | 3             | 1511        | 0.48         | 2                | 763        | 4          | 706        | 0.616        |
| 0005488 | binding                                                       | 476                   | 999         | 531           | 983         | 0.114        | <b>271</b>       | <b>494</b> | <b>205</b> | <b>505</b> | <b>0.008</b> |
| 0005509 | calcium ion binding                                           | 29                    | 1446        | 32            | 1482        | 0.876        | 15               | 750        | 14         | 696        | 0.863        |
| 0030246 | carbohydrate binding                                          | 6                     | 1469        | 9             | 1505        | 0.64         | 3                | 762        | 3          | 707        | 0.751        |
| 0008289 | lipid binding                                                 | 14                    | 1461        | 12            | 1502        | 0.792        | 8                | 757        | 6          | 704        | 0.898        |
| 0003676 | nucleic acid binding                                          | 192                   | 1283        | 197           | 1317        | 0.96         | <b>119</b>       | <b>646</b> | <b>73</b>  | <b>637</b> | <b>0.003</b> |
| 0003677 | DNA binding                                                   | 101                   | 1374        | 93            | 1421        | 0.479        | 62               | 703        | 39         | 671        | 0.06         |
| 0003682 | chromatin binding                                             | 14                    | 1461        | 9             | 1505        | 0.368        | 10               | 755        | 4          | 706        | 0.229        |
| 0003700 | transcription factor activity                                 | 39                    | 1436        | 47            | 1467        | 0.52         | 21               | 744        | 18         | 692        | 0.929        |
| 0003723 | RNA binding                                                   | 57                    | 1418        | 62            | 1452        | 0.819        | 37               | 728        | 20         | 690        | 0.061        |
| 0008135 | translation factor activity, nucleic acid binding             | 19                    | 1456        | 16            | 1498        | 0.676        | 14               | 751        | 5          | 705        | 0.092        |
| 0000166 | nucleotide binding                                            | 127                   | 1348        | 128           | 1386        | 0.931        | 75               | 690        | 52         | 658        | 0.109        |
| 0005515 | protein binding                                               | 177                   | 1298        | 202           | 1312        | 0.295        | 100              | 665        | 77         | 633        | 0.217        |
| 0008134 | transcription factor binding                                  | 19                    | 1456        | 12            | 1502        | 0.248        | 13               | 752        | 6          | 704        | 0.221        |
| 0008092 | cytoskeletal protein binding                                  | 43                    | 1432        | 45            | 1469        | 0.987        | 26               | 739        | 17         | 693        | 0.322        |
| 0003779 | actin binding                                                 | 28                    | 1447        | 25            | 1489        | 0.709        | 18               | 747        | 10         | 700        | 0.255        |
| 0003824 | catalytic activity                                            | 392                   | 1083        | 447           | 1067        | 0.08         | 205              | 560        | 187        | 523        | 0.888        |
| 0016787 | hydrolase activity                                            | 173                   | 1302        | 199           | 1315        | 0.264        | 101              | 664        | 72         | 638        | 0.081        |
| 0003924 | GTPase activity                                               | 19                    | 1456        | 21            | 1493        | 0.939        | 8                | 757        | 11         | 699        | 0.531        |
| 0004518 | nuclease activity                                             | <b>12</b>             | <b>1463</b> | <b>3</b>      | <b>1511</b> | <b>0.034</b> | 7                | 758        | 5          | 705        | 0.873        |

## PC9

| GO#     | GO term                                    | Representational bias |             |               |             |              | Directional bias |            |           |            |              |
|---------|--------------------------------------------|-----------------------|-------------|---------------|-------------|--------------|------------------|------------|-----------|------------|--------------|
|         |                                            | regulated             |             | not regulated |             | $\rho$       | up-reg.          |            | down-reg. |            | $\rho$       |
|         |                                            | term                  | n.term      | term          | n.term      |              | term             | n.term     | term      | n.term     |              |
| 0008233 | peptidase activity                         | 54                    | 1421        | 64            | 1450        | 0.483        | 31               | 734        | 23        | 687        | 0.489        |
| 0004721 | phosphoprotein phosphatase activity        | 13                    | 1462        | 17            | 1497        | 0.632        | 10               | 755        | 3         | 707        | 0.124        |
| 0016740 | transferase activity                       | 117                   | 1358        | 124           | 1390        | 0.848        | 67               | 698        | 50        | 660        | 0.262        |
| 0016301 | kinase activity                            | 62                    | 1413        | 73            | 1441        | 0.468        | 37               | 728        | 25        | 685        | 0.259        |
| 0004672 | protein kinase activity                    | 47                    | 1428        | 48            | 1466        | 0.937        | 28               | 737        | 19        | 691        | 0.354        |
| 0030234 | enzyme regulator activity                  | 51                    | 1424        | 54            | 1460        | 0.95         | 23               | 742        | 28        | 682        | 0.4          |
| 0003774 | motor activity                             | 15                    | 1460        | 13            | 1501        | 0.795        | 7                | 758        | 8         | 702        | 0.885        |
| 0004871 | signal transducer activity                 | 132                   | 1343        | 124           | 1390        | 0.499        | 71               | 694        | 61        | 649        | 0.71         |
| 0004872 | receptor activity                          | 58                    | 1417        | 51            | 1463        | 0.469        | 29               | 736        | 29        | 681        | 0.876        |
| 0004879 | ligand-dependent nuclear receptor activity | 6                     | 1469        | 3             | 1511        | 0.48         | 3                | 762        | 3         | 707        | 0.751        |
| 0004888 | transmembrane receptor activity            | 37                    | 1438        | 37            | 1477        | 0.997        | 18               | 747        | 19        | 691        | 0.818        |
| 0004930 | G-protein coupled receptor activity        | 15                    | 1460        | 15            | 1499        | 0.911        | 7                | 758        | 8         | 702        | 0.885        |
| 0005057 | receptor signaling protein activity        | 41                    | 1434        | 39            | 1475        | 0.817        | <b>29</b>        | <b>736</b> | <b>12</b> | <b>698</b> | <b>0.022</b> |
| 0005102 | receptor binding                           | 38                    | 1437        | 31            | 1483        | 0.401        | 19               | 746        | 19        | 691        | 0.945        |
| 0005198 | structural molecule activity               | 76                    | 1399        | 86            | 1428        | 0.578        | 42               | 723        | 34        | 676        | 0.623        |
| 0030528 | transcription regulator activity           | 93                    | 1382        | 106           | 1408        | 0.49         | <b>58</b>        | <b>707</b> | <b>35</b> | <b>675</b> | <b>0.047</b> |
| 0045182 | translation regulator activity             | 19                    | 1456        | 16            | 1498        | 0.676        | 14               | 751        | 5         | 705        | 0.092        |
| 0005215 | transporter activity                       | 122                   | 1353        | 131           | 1383        | 0.757        | 53               | 712        | 69        | 641        | 0.064        |
| 0005489 | electron transporter activity              | 14                    | 1461        | 15            | 1499        | 0.944        | 4                | 761        | 10        | 700        | 0.138        |
| 0005216 | ion channel activity                       | 22                    | 1453        | 30            | 1484        | 0.376        | 9                | 756        | 13        | 697        | 0.412        |
| 0005244 | voltage-gated ion channel activity         | 12                    | 1463        | 14            | 1500        | 0.896        | 7                | 758        | 5         | 705        | 0.873        |
| 0005575 | cellular_component                         | 597                   | 878         | 626           | 888         | 0.654        | 310              | 455        | 287       | 423        | 0.989        |
| 0005623 | cell                                       | 544                   | 931         | 568           | 946         | 0.748        | 291              | 474        | 253       | 457        | 0.367        |
| 0005622 | intracellular                              | 418                   | 1057        | 439           | 1075        | 0.721        | 231              | 534        | 187       | 523        | 0.113        |
| 0005737 | cytoplasm                                  | 222                   | 1253        | 236           | 1278        | 0.721        | 116              | 649        | 106       | 604        | 0.958        |
| 0016023 | cytoplasmic vesicle                        | 23                    | 1452        | 18            | 1496        | 0.476        | 9                | 756        | 14        | 696        | 0.307        |
| 0005829 | cytosol                                    | 39                    | 1436        | 40            | 1474        | 0.912        | 25               | 740        | 14        | 696        | 0.165        |
| 0005783 | endoplasmic reticulum                      | 22                    | 1453        | 35            | 1479        | 0.132        | 15               | 750        | 7         | 703        | 0.184        |
| 0005794 | Golgi apparatus                            | 14                    | 1461        | 11            | 1503        | 0.64         | 9                | 756        | 5         | 705        | 0.505        |
| 0005815 | microtubule organizing center              | 6                     | 1469        | 3             | 1511        | 0.48         | 3                | 762        | 3         | 707        | 0.751        |
| 0005739 | mitochondrion                              | 44                    | 1431        | 61            | 1453        | 0.146        | 17               | 748        | 27        | 683        | 0.103        |
| 0005840 | ribosome                                   | 9                     | 1466        | 15            | 1499        | 0.337        | 3                | 762        | 6         | 704        | 0.435        |
| 0005773 | vacuole                                    | 5                     | 1470        | 9             | 1505        | 0.45         | 0                | 765        | 5         | 705        | 0.061        |
| 0005764 | lysosome                                   | 1                     | 1474        | 4             | 1510        | 0.386        | 0                | 765        | 1         | 709        | 0.97         |
| 0005856 | cytoskeleton                               | 41                    | 1434        | 44            | 1470        | 0.922        | 24               | 741        | 17        | 693        | 0.479        |
| 0005694 | chromosome                                 | 21                    | 1454        | 19            | 1495        | 0.809        | <b>17</b>        | <b>748</b> | <b>4</b>  | <b>706</b> | <b>0.014</b> |
| 0000228 | nuclear chromosome                         | 1                     | 1474        | 4             | 1510        | 0.386        | 1                | 764        | 0         | 710        | 0.97         |
| 0005634 | nucleus                                    | 184                   | 1291        | 188           | 1326        | 0.994        | <b>116</b>       | <b>649</b> | <b>68</b> | <b>642</b> | <b>0.002</b> |
| 0005635 | nuclear membrane                           | 9                     | 1466        | 8             | 1506        | 0.957        | 7                | 758        | 2         | 708        | 0.22         |
| 0005730 | nucleolus                                  | 3                     | 1472        | 8             | 1506        | 0.244        | 1                | 764        | 2         | 708        | 0.948        |
| 0005654 | nucleoplasm                                | 37                    | 1438        | 35            | 1479        | 0.817        | 24               | 741        | 13        | 697        | 0.151        |
| 0005777 | peroxisome                                 | 6                     | 1469        | 3             | 1511        | 0.48         | 5                | 760        | 1         | 709        | 0.256        |
| 0005886 | plasma membrane                            | 78                    | 1397        | 78            | 1436        | 0.932        | 41               | 724        | 37        | 673        | 0.991        |
| 0005576 | extracellular region                       | <b>25</b>             | <b>1450</b> | <b>51</b>     | <b>1463</b> | <b>0.005</b> | 9                | 756        | 16        | 694        | 0.162        |
| 0005578 | extracellular matrix (sensu Metazoa)       | 13                    | 1462        | 22            | 1492        | 0.2          | 5                | 760        | 8         | 702        | 0.489        |
