# Supplementary material
Source: PubMed Central journal article supplement (PMC1697327)

Colony 1

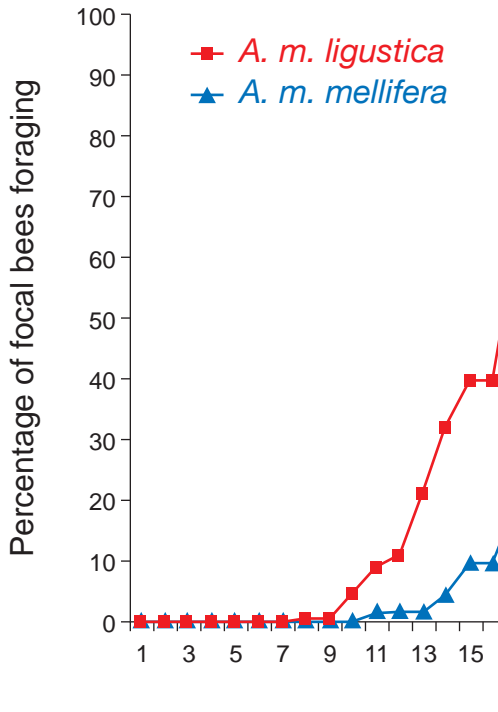

Colony 2

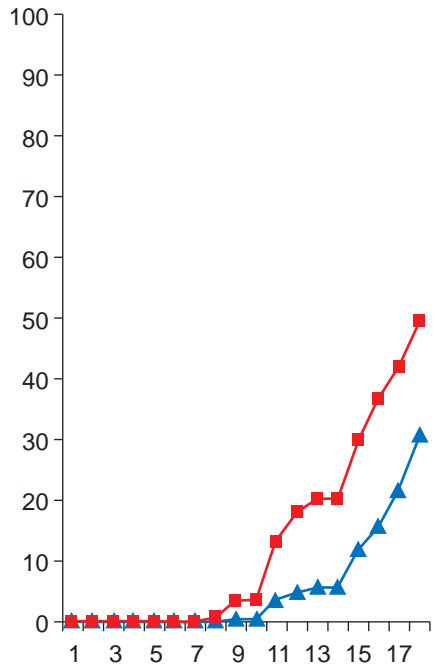

Supplement: pnas_0606909103_1.pdf [file pnas_0606909103_1.pdf]

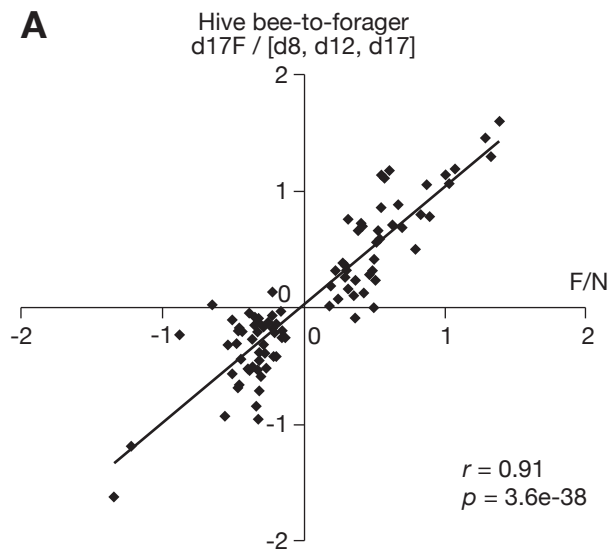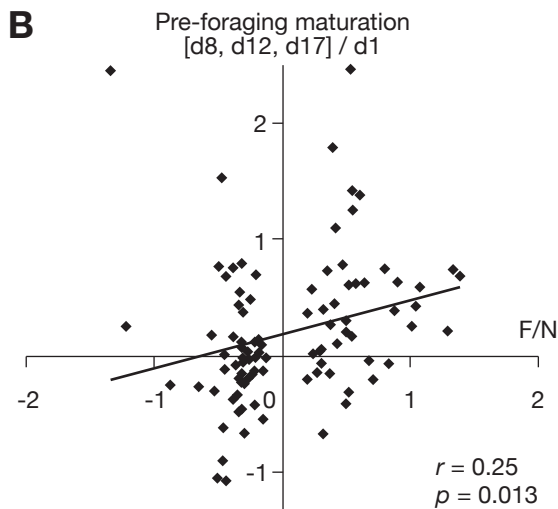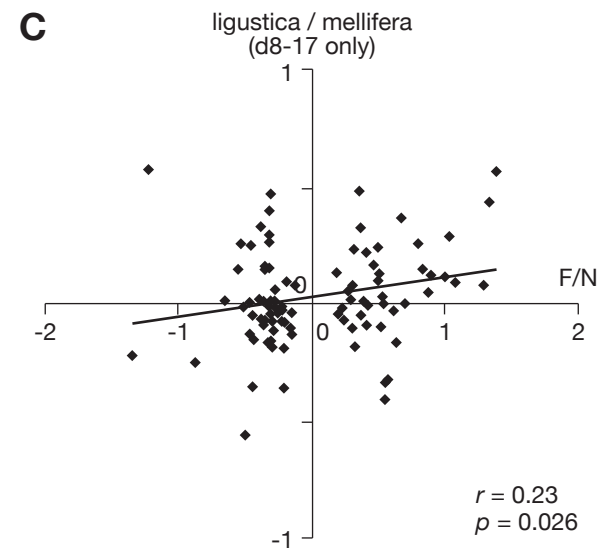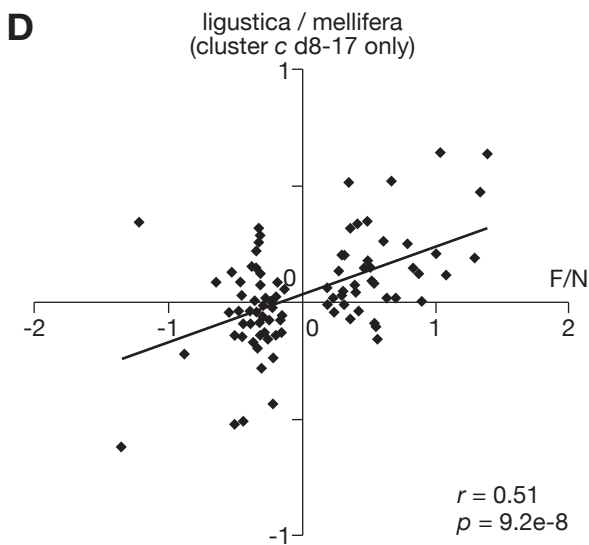

Supplement: pnas_0606909103_2.pdf [file pnas_0606909103_2.pdf]

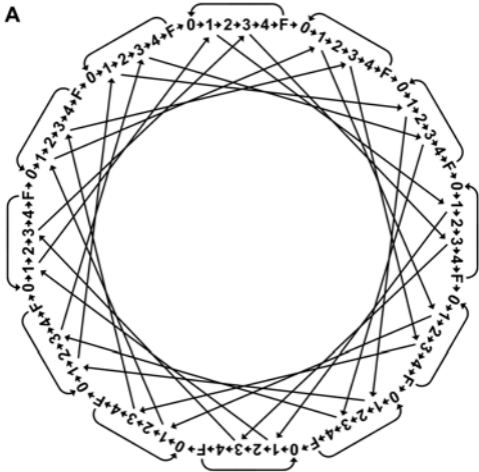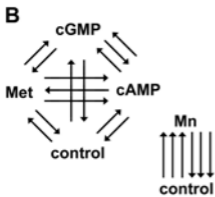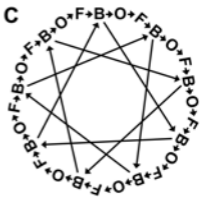

Supplement: pnas_0606909103_4.pdf [file pnas_0606909103_4.pdf]
